# Supplementary material
Source: publisher site journal article supplement (https://mbmg.pensoft.net/article/85794/download/suppl/32/)
Supplement: Supplementary file 1

## Sheet: ReadMe
			Sheet	Content
			ASV counts	ASV counts per sample of the 15 sample set (time-series) from the Belgial Coastal Zone
			Taxonomy	Taxonomical assignment of ASVs using PR2 as reference database

## Sheet: ASV counts
#ASV	Sample 1	Sample 2	Sample 3	Sample 4	Sample 5	Sample 6	Sample 7	Sample 8	Sample 9	Sample 10	Sample 11	Sample 12	Sample 13	Sample 14	Sample 15	Kingdom	Supergroup	Division	Class	Order	Family	Genus	Species	TAXA
1	0	0	0	0	0	0	5	0	7	0	0	0	0	0	0	Eukaryota	Alveolata	Ciliophora	CONThreeP	CONThreeP_X	CONThreeP_XX	Askenasia	Askenasia_sp.	Ciliophora (Alveolata)
2	0	0	0	0	0	0	1166	31	90	0	0	0	0	0	0	Eukaryota	Alveolata	Dinoflagellata	Syndiniales	Dino-Group-I	Dino-Group-I-Clade-4	Dino-Group-I-Clade-4_X	Dino-Group-I-Clade-4_X_sp.	Dinoflagellata (Alveolata)
3	0	0	0	0	0	0	0	0	0	5	0	0	273	18	0	Eukaryota	Alveolata	Ciliophora	Phyllopharyngea	Suctoria	Ephelotidae	Ephelota	Ephelota_mammillata	Ciliophora (Alveolata)
5	0	0	0	0	0	0	0	0	0	0	0	0	5	0	0	Eukaryota	Stramenopiles	Ochrophyta	Chrysophyceae	Chrysophyceae_X	Chrysophyceae_Clade-C	Chrysophyceae_Clade-C_X	Chrysophyceae_Clade-C_X_sp.	Bacillariophyta (Stramenopiles)
6	0	0	0	0	0	0	0	0	0	0	0	0	22	0	0	Eukaryota	Alveolata	Ciliophora	Phyllopharyngea	Suctoria	Ephelotidae	Ephelota	Ephelota_mammillata	Ciliophora (Alveolata)
7	0	0	0	0	0	0	0	0	0	0	0	0	7146	2437	38	Eukaryota	Alveolata	Dinoflagellata	Dinophyceae	Dinophyceae_X	Dinophyceae_XX	Dinophyceae_XXX	Dinophyceae_XXX_sp.	Dinoflagellata (Alveolata)
9	0	359	186	363	28	5	0	0	0	0	0	0	0	0	0	Eukaryota	Alveolata	Dinoflagellata	Syndiniales	Dino-Group-I	Dino-Group-I-Clade-4	Dino-Group-I-Clade-4_X	Dino-Group-I-Clade-4_X_sp.	Dinoflagellata (Alveolata)
12	0	0	2	5	0	0	0	0	0	0	0	0	0	0	0	Eukaryota	Alveolata	Ciliophora	CONThreeP	CONThreeP_X	CONThreeP_XX	Askenasia	Askenasia_sp.	Ciliophora (Alveolata)
13	0	0	0	0	0	0	0	0	224	0	0	0	0	0	0	Eukaryota	Stramenopiles	Ochrophyta	Bacillariophyta	Bacillariophyta_X	Polar-centric-Mediophyceae	Thalassiosira	Thalassiosira_minima	Bacillariophyta (Stramenopiles)
14	239	0	0	0	0	0	0	0	0	0	0	0	0	0	0	Eukaryota	Alveolata	Dinoflagellata	Dinophyceae	Dinophyceae_X	Dinophyceae_XX	Dinophyceae_XXX	Dinophyceae_XXX_sp.	Dinoflagellata (Alveolata)
18	0	0	0	0	0	0	0	0	0	49	0	0	0	0	0	Eukaryota	Rhizaria	Cercozoa	Filosa-Thecofilosea	Cryomonadida	Protaspa-lineage	Protaspa-lineage_X	Protaspa-lineage_X_sp.	Flagellated cells
19	0	0	0	0	6	41	0	0	0	0	0	0	0	0	0	Eukaryota	Stramenopiles	Opalozoa	MAST-3	MAST-3E	MAST-3E_X	MAST-3E_XX	MAST-3E_XX_sp.	Bacillariophyta (Stramenopiles)
20	0	0	0	5	0	0	0	0	0	0	0	0	0	0	0	Eukaryota	Stramenopiles	Ochrophyta	Bacillariophyta	Bacillariophyta_X	Raphid-pennate	Cymbella	Cymbella_similis	Bacillariophyta (Stramenopiles)
21	0	0	0	0	0	0	0	302	0	0	29	0	0	0	0	Eukaryota	Alveolata	Dinoflagellata	Dinophyceae	Dinophyceae_X	Dinophyceae_XX	Dinophyceae_XXX	Dinophyceae_XXX_sp.	Dinoflagellata (Alveolata)
24	0	0	0	0	0	0	0	399	20	0	118	0	0	0	0	Eukaryota	Alveolata	Ciliophora	Spirotrichea	Choreotrichida	Strobilidiidae_E	Strobilidium_E	Strobilidium_caudatum	Ciliophora (Alveolata)
25	0	0	0	0	0	0	0	0	29	0	0	0	0	0	0	Eukaryota	Stramenopiles	Ochrophyta	Chrysophyceae	Chrysophyceae_X	Chrysophyceae_Clade-C	Spumella	Spumella_elongata	Bacillariophyta (Stramenopiles)
26	0	0	0	0	0	0	249	0	0	0	0	0	0	0	0	Eukaryota	Alveolata	Ciliophora	Spirotrichea	Tintinnida	Tintinnidae	Tintinnidae_X	Tintinnidae_X_sp.	Ciliophora (Alveolata)
27	0	0	1	7	6	0	0	0	0	0	0	0	0	0	0	Eukaryota	Rhizaria	Cercozoa	Filosa-Sarcomonadea	Cercomonadida	Cercomonadidae	Cercomonas	Cercomonas_alexieffi	Flagellated cells
28	0	0	0	0	0	0	38	36	29	0	0	0	0	0	0	Eukaryota	Stramenopiles	Ochrophyta	Bacillariophyta	Bacillariophyta_X	Polar-centric-Mediophyceae	Thalassiosira	Thalassiosira_minima	Bacillariophyta (Stramenopiles)
31	0	0	8	7	0	3	0	0	0	0	0	0	0	0	0	Eukaryota	Rhizaria	Cercozoa	Filosa-Thecofilosea	Cryomonadida	Protaspa-lineage	Protaspa	Protaspa_grandis	Flagellated cells
32	0	0	0	0	0	0	0	0	7	0	0	0	0	0	0	Eukaryota	Alveolata	Ciliophora	Spirotrichea	Strombidiida	Strombidiidae	Spirostrombidium	Spirostrombidium_agathae	Ciliophora (Alveolata)
33	0	0	0	0	0	0	47	22	0	0	0	23	0	12	0	Eukaryota	Stramenopiles	Ochrophyta	Bacillariophyta	Bacillariophyta_X	Raphid-pennate	Pleurosigma	Pleurosigma_intermedium	Bacillariophyta (Stramenopiles)
34	0	0	10	0	0	0	0	0	0	0	0	0	0	0	0	Eukaryota	Alveolata	Ciliophora	Spirotrichea	Choreotrichida	Strobilidiidae_I	Pelagostrobilidium	Pelagostrobilidium_sp.	Ciliophora (Alveolata)
35	0	0	0	0	0	0	0	0	0	0	0	0	0	29	0	Eukaryota	Opisthokonta	Mesomycetozoa	Ichthyosporea	Ichthyosphonida	Abeoformidae_Group_MAIP_1	Abeoformidae_Group_MAIP_1_X	Abeoformidae_Group_MAIP_1_X_sp.	Flagellated cells
36	0	0	0	0	0	5	0	0	0	0	0	0	0	0	0	Eukaryota	Alveolata	Ciliophora	CONThreeP	CONThreeP_X	CONThreeP_XX	Askenasia	Askenasia_sp.	Ciliophora (Alveolata)
37	0	1978	27	14	441	176	0	0	0	0	0	0	0	0	0	Eukaryota	Alveolata	Dinoflagellata	Dinophyceae	Dinophyceae_X	Dinophyceae_XX	Dinophyceae_XXX	Dinophyceae_XXX_sp.	Dinoflagellata (Alveolata)
38	0	0	0	0	0	0	9	0	0	0	0	0	0	0	0	Eukaryota	Stramenopiles	Ochrophyta	Chrysophyceae	Chrysophyceae_X	Chrysophyceae_Clade-F	Chrysophyceae_Clade-F_X	Chrysophyceae_Clade-F_X_sp.	Bacillariophyta (Stramenopiles)
39	0	0	0	19	16	9	0	0	0	0	0	0	0	0	0	Eukaryota	Stramenopiles	Ochrophyta	Bacillariophyta	Bacillariophyta_X	Polar-centric-Mediophyceae	Thalassiosira	Thalassiosira_eccentrica	Bacillariophyta (Stramenopiles)
40	0	0	0	0	0	0	0	17	18	0	12	0	0	0	0	Eukaryota	Rhizaria	Cercozoa	Filosa-Thecofilosea	Ventricleftida	Ventrifissuridae	Ventrifissuridae_X	Ventrifissuridae_X_sp.	Flagellated cells
41	0	0	0	0	0	0	89	46	51	27	32	0	12	24	0	Eukaryota	Alveolata	Dinoflagellata	Dinophyceae	Dinophyceae_X	Dinophyceae_XX	Dinophyceae_XXX	Dinophyceae_XXX_sp.	Dinoflagellata (Alveolata)
42	0	166	0	0	43	0	0	0	0	0	0	0	0	0	0	Eukaryota	Alveolata	Dinoflagellata	Dinophyceae	Dinophyceae_X	Dinophyceae_XX	Dinophyceae_XXX	Dinophyceae_XXX_sp.	Dinoflagellata (Alveolata)
45	0	0	19	74	33	0	0	0	0	0	0	0	0	0	0	Eukaryota	Stramenopiles	Ochrophyta	Bacillariophyta	Bacillariophyta_X	Polar-centric-Mediophyceae	Thalassiosira	Thalassiosira_sp.	Bacillariophyta (Stramenopiles)
46	0	0	0	0	18	8	0	0	0	0	0	0	0	0	0	Eukaryota	Alveolata	Ciliophora	Spirotrichea	Tintinnida	Tintinnidae	Tintinnidae_X	Tintinnidae_X_sp.	Ciliophora (Alveolata)
48	0	0	0	0	0	0	0	0	0	0	3	0	0	0	0	Eukaryota	Alveolata	Ciliophora	Spirotrichea	Hypotrichia	Hypotrichia_X	Hypotrichia_XX	Hypotrichia_XX_sp.	Ciliophora (Alveolata)
50	0	0	0	0	0	0	8	0	0	0	0	0	0	0	0	Eukaryota	Stramenopiles	Ochrophyta	Chrysophyceae	Chrysophyceae_X	Chrysophyceae_Clade-F	Chrysophyceae_Clade-F_X	Chrysophyceae_Clade-F_X_sp.	Bacillariophyta (Stramenopiles)
51	0	0	0	0	0	0	0	86	3	0	5	0	0	0	0	Eukaryota	Alveolata	Ciliophora	CONThreeP	CONThreeP_X	Plagiocampidae	Plagiocampa	Plagiocampa_sp.	Ciliophora (Alveolata)
52	0	0	0	0	0	0	0	0	0	0	15	0	0	0	0	Eukaryota	Alveolata	Ciliophora	CONThreeP	CONThreeP_X	CONThreeP_XX	Askenasia	Askenasia_sp.	Ciliophora (Alveolata)
53	0	0	0	0	0	0	13	0	40	330	49	15	0	0	0	Eukaryota	Rhizaria	Cercozoa	Filosa-Thecofilosea	Cryomonadida	Protaspa-lineage	Protaspa-lineage_X	Protaspa-lineage_X_sp.	Flagellated cells
54	0	0	0	0	0	0	13	0	27	21	35	0	16	141	0	Eukaryota	Rhizaria	Cercozoa	Filosa-Thecofilosea	Cryomonadida	Protaspa-lineage	Protaspa-lineage_X	Protaspa-lineage_X_sp.	Flagellated cells
55	0	0	0	0	0	7	0	0	0	0	0	0	0	0	0	Eukaryota	Rhizaria	Cercozoa	Filosa-Sarcomonadea	Cercomonadida	Cercomonadidae	Cercomonas	Cercomonas_parincurva	Flagellated cells
56	0	0	0	0	0	0	0	0	99	0	0	0	0	0	0	Eukaryota	Alveolata	Ciliophora	CONTH_7	CONTH_7_X	CONTH_7_XX	CONTH_7_XXX	CONTH_7_XXX_sp.	Ciliophora (Alveolata)
57	0	0	0	0	0	0	0	18	22	14	10	76	0	47	68	Eukaryota	Alveolata	Dinoflagellata	Dinophyceae	Dinophyceae_X	Dinophyceae_XX	Dinophyceae_XXX	Dinophyceae_XXX_sp.	Dinoflagellata (Alveolata)
58	0	0	0	0	0	0	0	0	23	0	0	0	0	0	0	Eukaryota	Amoebozoa	Lobosa	Discosea-Longamoebia	Dermamoebida	Mayorellidae	Mayorella	Mayorella_sp.	Flagellated cells
60	0	9	35	15	0	0	0	0	0	0	0	0	0	0	0	Eukaryota	Rhizaria	Cercozoa	Filosa-Thecofilosea	Cryomonadida	Protaspa-lineage	Protaspa-lineage_X	Protaspa-lineage_X_sp.	Flagellated cells
62	0	7	0	0	0	0	0	0	0	0	0	0	0	0	0	Eukaryota	Alveolata	Ciliophora	CONTH_7	CONTH_7_X	CONTH_7_XX	CONTH_7_XXX	CONTH_7_XXX_sp.	Ciliophora (Alveolata)
63	0	0	0	13	0	34	0	0	0	0	0	0	0	0	0	Eukaryota	Alveolata	Dinoflagellata	Dinophyceae	Torodiniales	Torodiniaceae	Torodinium	Torodinium_robustum	Dinoflagellata (Alveolata)
65	0	0	0	0	0	0	110	72	0	0	0	0	0	65	0	Eukaryota	Hacrobia	Haptophyta	Prymnesiophyceae	Prymnesiales	Chrysochromulinaceae	Chrysochromulina	Chrysochromulina_sp.	Flagellated cells
66	0	0	40	44	110	18	0	0	0	0	0	0	0	0	0	Eukaryota	Alveolata	Dinoflagellata	Dinophyceae	Dinophyceae_X	Dinophyceae_XX	Dinophyceae_XXX	Dinophyceae_XXX_sp.	Dinoflagellata (Alveolata)
67	0	0	0	0	0	0	0	0	0	0	12	0	0	0	0	Eukaryota	Stramenopiles	Ochrophyta	Chrysophyceae	Chrysophyceae_X	Chrysophyceae_Clade-F	Paraphysomonas	Paraphysomonas_imperforata	Bacillariophyta (Stramenopiles)
68	27	0	0	0	0	0	0	0	0	0	0	0	0	0	0	Eukaryota	Rhizaria	Cercozoa	Filosa-Thecofilosea	Cryomonadida	Protaspa-lineage	Protaspa-lineage_X	Protaspa-lineage_X_sp.	Flagellated cells
69	0	0	0	0	0	0	11	0	0	175	3	397	0	0	0	Eukaryota	Stramenopiles	Ochrophyta	Bacillariophyta	Bacillariophyta_X	Raphid-pennate	Meuniera	Meuniera_membranacea	Bacillariophyta (Stramenopiles)
70	0	0	0	0	0	0	22	0	0	0	0	0	0	0	0	Eukaryota	Hacrobia	Haptophyta	Prymnesiophyceae	Prymnesiophyceae_Clade_E	Prymnesiophyceae_Clade_E_X	Prymnesiophyceae_Clade_E_XX	Prymnesiophyceae_Clade_E_XX_sp.	Flagellated cells
72	0	0	0	0	0	0	0	0	9	0	0	0	0	0	0	Eukaryota	Stramenopiles	Ochrophyta	Chrysophyceae	Chrysophyceae_X	Chrysophyceae_Clade-F	Paraphysomonas	Paraphysomonas_imperforata	Bacillariophyta (Stramenopiles)
73	0	4	0	18	0	0	0	0	0	0	0	0	0	0	0	Eukaryota	Alveolata	Ciliophora	Spirotrichea	Strombidiida	Strombidiidae	Parallelostrombidium	Parallelostrombidium_conicum	Ciliophora (Alveolata)
74	0	0	0	0	0	0	0	0	11	0	0	0	0	0	0	Eukaryota	Stramenopiles	Ochrophyta	Bacillariophyta	Bacillariophyta_X	Polar-centric-Mediophyceae	Thalassiosira	Thalassiosira_sp.	Bacillariophyta (Stramenopiles)
75	0	0	199	135	144	96	0	0	0	0	0	0	0	0	0	Eukaryota	Alveolata	Dinoflagellata	Syndiniales	Dino-Group-I	Dino-Group-I-Clade-4	Dino-Group-I-Clade-4_X	Dino-Group-I-Clade-4_X_sp.	Dinoflagellata (Alveolata)
76	0	0	0	0	0	4	0	0	0	0	0	0	0	0	0	Eukaryota	Alveolata	Dinoflagellata	Syndiniales	Dino-Group-II	Dino-Group-II-Clade-1	Dino-Group-II-Clade-1_X	Dino-Group-II-Clade-1_X_sp.	Dinoflagellata (Alveolata)
77	0	0	0	0	0	0	18	0	0	0	0	0	0	0	0	Eukaryota	Stramenopiles	Ochrophyta	Bacillariophyta	Bacillariophyta_X	Polar-centric-Mediophyceae	Polar-centric-Mediophyceae_X	Polar-centric-Mediophyceae_X_sp.	Bacillariophyta (Stramenopiles)
78	17	0	2	0	0	0	0	0	0	0	0	0	0	0	0	Eukaryota	Archaeplastida	Chlorophyta	Mamiellophyceae	Dolichomastigales	Dolichomastigaceae	Dolichomastigaceae-B	Dolichomastigaceae-B_sp.	Flagellated cells
79	0	18	0	0	0	0	0	0	0	0	0	0	0	0	0	Eukaryota	Alveolata	Ciliophora	Spirotrichea	Strombidiida	Strombidiidae	Parallelostrombidium	Parallelostrombidium_conicum	Ciliophora (Alveolata)
80	0	0	0	0	0	0	12	0	0	0	0	0	0	86	161	Eukaryota	Alveolata	Dinoflagellata	Dinophyceae	Dinophyceae_X	Dinophyceae_XX	Dinophyceae_XXX	Dinophyceae_XXX_sp.	Dinoflagellata (Alveolata)
81	0	0	0	0	0	0	0	0	7	0	0	0	0	0	0	Eukaryota	Rhizaria	Cercozoa	Filosa-Thecofilosea	Ventricleftida	Ventricleftida_X	Ventricleftida_XX	Ventricleftida_XX_sp.	Flagellated cells
83	0	0	1	0	0	0	0	0	0	0	0	0	0	0	0	Eukaryota	Opisthokonta	Mesomycetozoa	Ichthyosporea	Ichthyosphonida	Abeoformidae_Group_MAIP_1	Abeoformidae_Group_MAIP_1_X	Abeoformidae_Group_MAIP_1_X_sp.	Flagellated cells
84	0	0	3	8	0	0	0	0	0	0	0	0	0	0	0	Eukaryota	Alveolata	Dinoflagellata	Syndiniales	Dino-Group-II	Dino-Group-II-Clade-14	Dino-Group-II-Clade-14_X	Dino-Group-II-Clade-14_X_sp.	Dinoflagellata (Alveolata)
85	0	17	0	75	40	38	0	0	0	0	0	0	0	0	0	Eukaryota	Rhizaria	Cercozoa	Filosa-Thecofilosea	Cryomonadida	Protaspa-lineage	Protaspa-lineage_X	Protaspa-lineage_X_sp.	Flagellated cells
86	0	0	0	0	0	0	0	0	0	25	0	0	0	20	0	Eukaryota	Rhizaria	Cercozoa	Filosa-Thecofilosea	Cryomonadida	Protaspa-lineage	Protaspa-lineage_X	Protaspa-lineage_X_sp.	Flagellated cells
88	0	0	0	0	0	0	0	0	0	0	0	0	3	14	0	Eukaryota	Rhizaria	Cercozoa	Filosa-Imbricatea	Thaumatomonadida	Thaumatomonadidae	Thaumatomastix	Thaumatomastix_salina	Flagellated cells
90	0	0	0	0	0	0	0	0	0	0	0	24	0	0	0	Eukaryota	Opisthokonta	Mesomycetozoa	Ichthyosporea	Ichthyosphonida	Abeoformidae_Group_MAIP_1	Abeoformidae_Group_MAIP_1_X	Abeoformidae_Group_MAIP_1_X_sp.	Flagellated cells
91	0	0	0	0	0	0	0	16	4	0	189	0	0	10	8	Eukaryota	Alveolata	Ciliophora	Spirotrichea	Choreotrichida	Strobilidiidae_G	Strobilidiidae_G_X	Strobilidiidae_G_X_sp.	Ciliophora (Alveolata)
92	0	0	0	0	0	0	4	9	0	0	0	0	0	0	0	Eukaryota	Rhizaria	Cercozoa	Filosa-Thecofilosea	Ebriida	Botuliformidae	Botuliformidae_X	Botuliformidae_X_sp.	Flagellated cells
93	0	0	0	0	0	0	10	128	18	0	0	0	0	0	0	Eukaryota	Alveolata	Dinoflagellata	Syndiniales	Dino-Group-I	Dino-Group-I-Clade-4	Dino-Group-I-Clade-4_X	Dino-Group-I-Clade-4_X_sp.	Dinoflagellata (Alveolata)
96	0	0	0	0	227	693	0	0	0	0	0	0	0	0	0	Eukaryota	Alveolata	Dinoflagellata	Dinophyceae	Gymnodiniales	Kareniaceae	Karlodinium	Karlodinium_veneficum	Dinoflagellata (Alveolata)
97	0	0	0	0	0	0	0	7	0	0	0	0	0	0	0	Eukaryota	Alveolata	Ciliophora	Spirotrichea	Tintinnida	Tintinnidae	Tintinnidae_X	Tintinnidae_X_sp.	Ciliophora (Alveolata)
98	0	0	0	0	0	0	179	27	0	7	0	0	3	129	22	Eukaryota	Alveolata	Ciliophora	Spirotrichea	Choreotrichida	Strobilidiidae_I	Strobilidiidae_I_X	Strobilidiidae_I_X_sp.	Ciliophora (Alveolata)
99	0	0	0	0	0	0	0	0	0	0	12	123	18	68	0	Eukaryota	Opisthokonta	Mesomycetozoa	Ichthyosporea	Ichthyosphonida	Abeoformidae_Group_MAIP_2	Abeoformidae_Group_MAIP_2_X	Abeoformidae_Group_MAIP_2_X_sp.	Flagellated cells
100	0	0	0	0	0	0	0	0	0	0	0	352	12	0	0	Eukaryota	Amoebozoa	Conosa	Mycetozoa-Myxogastrea	Stemonitales-Physarales	Stemonitales-Physarales_X	Kelleromyxa	Kelleromyxa_fimicola	Flagellated cells
102	0	0	0	0	444	40	0	0	0	0	0	0	0	0	0	Eukaryota	Alveolata	Dinoflagellata	Dinophyta_X	Dinophyta_XX	Dinophyta_XXX	Dinophyta_XXXX	Dinophyta_XXXX_sp.	Dinoflagellata (Alveolata)
103	0	0	0	0	0	0	0	0	0	0	0	0	38	2	0	Eukaryota	Stramenopiles	Ochrophyta	Chrysophyceae	Chrysophyceae_X	Chrysophyceae_Clade-F	Paraphysomonas	Paraphysomonas_sp.	Bacillariophyta (Stramenopiles)
104	0	0	0	0	0	0	0	0	0	13	0	13	0	0	0	Eukaryota	Opisthokonta	Mesomycetozoa	Ichthyosporea	Ichthyosphonida	Abeoformidae_Group_MAIP_1	Abeoformidae_Group_MAIP_1_X	Abeoformidae_Group_MAIP_1_X_sp.	Flagellated cells
105	0	0	0	4	0	5	0	0	0	0	0	0	0	0	0	Eukaryota	Stramenopiles	Ochrophyta	Bolidophyceae	Parmales	Parmales_env_3	Parmales_env_3A	Parmales_env_3A_sp.	Bacillariophyta (Stramenopiles)
106	0	0	0	0	0	0	2	0	0	0	0	0	0	0	0	Eukaryota	Stramenopiles	Ochrophyta	Bacillariophyta	Bacillariophyta_X	Raphid-pennate	Raphid-pennate_X	Raphid-pennate_X_sp.	Bacillariophyta (Stramenopiles)
107	0	0	0	0	0	0	0	0	9	0	0	0	0	0	0	Eukaryota	Alveolata	Ciliophora	Spirotrichea	Strombidiida	Strombidiidae	Parallelostrombidium	Parallelostrombidium_conicum	Ciliophora (Alveolata)
108	0	0	0	0	0	0	16	0	0	0	0	0	0	0	0	Eukaryota	Rhizaria	Foraminifera	Monothalamids	Monothalamids_Clade-C	Monothalamids_Clade-C_X	Shinkaiya	Shinkaiya_lindsayi	Flagellated cells
112	0	0	0	6	0	0	0	0	0	0	0	0	0	0	0	Eukaryota	Rhizaria	Cercozoa	Filosa-Thecofilosea	Ventricleftida	Ventricleftida_X	Ventricleftida_XX	Ventricleftida_XX_sp.	Flagellated cells
113	0	0	0	0	0	0	11	0	0	0	0	0	0	0	0	Eukaryota	Stramenopiles	Opalozoa	MAST-3	MAST-3E	MAST-3E_X	MAST-3E_XX	MAST-3E_XX_sp.	Bacillariophyta (Stramenopiles)
114	0	0	0	20	18	57	0	0	0	0	0	0	0	0	0	Eukaryota	Stramenopiles	Opalozoa	MAST-3	MAST-3A	MAST-3A_X	MAST-3A_XX	MAST-3A_XX_sp.	Bacillariophyta (Stramenopiles)
115	0	0	0	0	0	0	0	0	24	0	12	0	0	0	0	Eukaryota	Rhizaria	Cercozoa	Filosa-Thecofilosea	Cryomonadida	Protaspa-lineage	Protaspa-lineage_X	Protaspa-lineage_X_sp.	Flagellated cells
116	0	4	0	0	0	0	0	0	0	0	0	0	0	0	0	Eukaryota	Alveolata	Ciliophora	CONTH_7	CONTH_7_X	CONTH_7_XX	CONTH_7_XXX	CONTH_7_XXX_sp.	Ciliophora (Alveolata)
117	0	0	0	0	0	0	5	0	0	0	0	0	0	0	0	Eukaryota	Rhizaria	Cercozoa	Chlorarachniophyceae	Chlorarachnida	Minorisa-lineage	Minorisa	Minorisa_minuta	Flagellated cells
119	0	0	0	0	0	0	37	127	0	0	72	0	0	0	0	Eukaryota	Alveolata	Dinoflagellata	Dinophyceae	Dinophyceae_X	Dinophyceae_XX	Dinophyceae_XXX	Dinophyceae_XXX_sp.	Dinoflagellata (Alveolata)
120	0	0	0	0	0	0	0	0	0	0	0	0	0	0	7	Eukaryota	Alveolata	Dinoflagellata	Dinophyceae	Dinophyceae_X	Dinophyceae_XX	Dinophyceae_XXX	Dinophyceae_XXX_sp.	Dinoflagellata (Alveolata)
121	0	0	0	0	0	0	0	0	0	21	39	9	6	0	0	Eukaryota	Alveolata	Ciliophora	Oligohymenophorea	Scuticociliatia_1	Thigmophryidae	Myxophyllum	Myxophyllum_sp.	Ciliophora (Alveolata)
122	0	0	2	3	0	13	0	0	0	0	0	0	0	0	0	Eukaryota	Alveolata	Dinoflagellata	Syndiniales	Dino-Group-II	Dino-Group-II-Clade-7	Dino-Group-II-Clade-7_X	Dino-Group-II-Clade-7_X_sp.	Dinoflagellata (Alveolata)
123	0	0	18	0	0	0	0	0	0	0	0	0	0	0	0	Eukaryota	Rhizaria	Cercozoa	Filosa-Thecofilosea	Cryomonadida	Protaspa-lineage	Protaspa-lineage_X	Protaspa-lineage_X_sp.	Flagellated cells
124	0	0	0	0	0	0	0	0	0	5	0	6	1	0	0	Eukaryota	Rhizaria	Cercozoa	Chlorarachniophyceae	Chlorarachnida	Minorisa-lineage	Minorisa-lineage_X	Minorisa-lineage_X_sp.	Flagellated cells
125	0	0	0	0	0	0	0	2	4	0	0	0	0	0	0	Eukaryota	Rhizaria	Cercozoa	Filosa-Imbricatea	Thaumatomonadida	Thaumatomonadidae	Reckertia	Reckertia_filosa	Flagellated cells
126	0	9	29	13	55	12	0	0	0	0	0	0	0	0	0	Eukaryota	Alveolata	Dinoflagellata	Dinophyceae	Peridiniales	Amphidiniopsidaceae	Archaeperidinium	Archaeperidinium_minutum	Dinoflagellata (Alveolata)
127	0	0	0	0	0	0	0	600	71	0	127	9	0	0	0	Eukaryota	Alveolata	Ciliophora	Spirotrichea	Tintinnida	Tintinnidiidae	Tintinnidium	Tintinnidium_sp.	Ciliophora (Alveolata)
128	0	0	0	0	0	0	4	0	6	0	0	0	0	0	0	Eukaryota	Rhizaria	Cercozoa	Filosa-Imbricatea	Marimonadida	Marimonadida_X	Marimonadida_XX	Marimonadida_XX_sp.	Flagellated cells
129	0	0	0	0	0	0	0	0	0	0	16	0	0	0	0	Eukaryota	Stramenopiles	Ochrophyta	Bacillariophyta	Bacillariophyta_X	Polar-centric-Mediophyceae	Thalassiosira	Thalassiosira_guillardii	Bacillariophyta (Stramenopiles)
131	0	0	0	0	0	0	36	0	0	0	0	0	0	0	0	Eukaryota	Rhizaria	Cercozoa	Filosa-Thecofilosea	Ventricleftida	Ventrifissuridae	Ventrifissuridae_X	Ventrifissuridae_X_sp.	Flagellated cells
133	0	0	0	0	0	0	0	0	9	0	0	0	0	0	0	Eukaryota	Alveolata	Ciliophora	Oligohymenophorea	Scuticociliatia_1	Philasterida	Parauronema	Parauronema_longum	Ciliophora (Alveolata)
136	0	0	0	0	0	0	0	0	0	0	0	0	0	0	15	Eukaryota	Alveolata	Dinoflagellata	Dinophyceae	Dinophyceae_X	Dinophyceae_XX	Dinophyceae_XXX	Dinophyceae_XXX_sp.	Dinoflagellata (Alveolata)
137	0	0	0	0	0	0	0	160	1061	0	384	99	0	0	0	Eukaryota	Stramenopiles	Ochrophyta	Bacillariophyta	Bacillariophyta_X	Polar-centric-Mediophyceae	Thalassiosira	Thalassiosira_sp.	Bacillariophyta (Stramenopiles)
138	0	0	0	0	0	0	0	7	0	0	0	0	0	0	0	Eukaryota	Alveolata	Dinoflagellata	Dinophyceae	Dinophyceae_X	Ptychodiscaceae	Ptychodiscus	Ptychodiscus_noctiluca	Dinoflagellata (Alveolata)
139	0	0	0	0	0	0	0	0	0	0	0	0	8	12	0	Eukaryota	Alveolata	Ciliophora	Oligohymenophorea	Scuticociliatia_1	Philasterida	Philasterida_X	Philasterida_X_sp.	Ciliophora (Alveolata)
140	7	0	0	0	0	0	0	0	0	0	0	0	0	0	0	Eukaryota	Rhizaria	Cercozoa	Filosa-Imbricatea	Marimonadida	Marimonadida_X	Marimonadida_XX	Marimonadida_XX_sp.	Flagellated cells
143	0	0	0	0	0	0	0	13	95	0	5	0	0	0	0	Eukaryota	Alveolata	Ciliophora	CONThreeP	CONThreeP_X	CONThreeP_XX	Askenasia	Askenasia_sp.	Ciliophora (Alveolata)
145	0	0	0	0	0	0	0	0	0	0	0	0	5	0	0	Eukaryota	Rhizaria	Cercozoa	Filosa-Thecofilosea	Cryomonadida	Protaspa-lineage	Protaspa	Protaspa_grandis	Flagellated cells
146	0	5	0	8	8	56	0	0	0	0	0	0	0	0	0	Eukaryota	Stramenopiles	Ochrophyta	Bacillariophyta	Bacillariophyta_X	Radial-centric-basal-Coscinodiscophyceae	Leptocylindrus	Leptocylindrus_sp.	Bacillariophyta (Stramenopiles)
147	0	0	0	0	0	0	3	6	0	0	3	0	0	0	0	Eukaryota	Rhizaria	Cercozoa	Filosa-Thecofilosea	Cryomonadida	Protaspa-lineage	Protaspa-lineage_X	Protaspa-lineage_X_sp.	Flagellated cells
149	0	0	0	15	302	197	0	0	0	0	0	0	0	0	0	Eukaryota	Alveolata	Dinoflagellata	Syndiniales	Dino-Group-II	Dino-Group-II-Clade-10-and-11	Dino-Group-II-Clade-10-and-11_X	Dino-Group-II-Clade-10-and-11_X_sp.	Dinoflagellata (Alveolata)
150	0	0	0	0	0	0	0	0	0	0	0	0	0	0	7	Eukaryota	Hacrobia	Haptophyta	Prymnesiophyceae	Prymnesiophyceae_Clade_F	Prymnesiophyceae_Clade_F_X	Prymnesiophyceae_Clade_F_XX	Prymnesiophyceae_Clade_F_XX_sp.	Flagellated cells
151	6	0	0	0	0	0	0	0	0	0	0	0	0	0	0	Eukaryota	Alveolata	Dinoflagellata	Syndiniales	Dino-Group-I	Dino-Group-I-Clade-1	Dino-Group-I-Clade-1_X	Dino-Group-I-Clade-1_X_sp.	Dinoflagellata (Alveolata)
152	0	0	0	0	0	0	0	8	0	0	0	0	0	0	0	Eukaryota	Stramenopiles	Ochrophyta	Bacillariophyta	Bacillariophyta_X	Raphid-pennate	Nitzschia	Nitzschia_linearis	Bacillariophyta (Stramenopiles)
153	0	0	0	0	0	0	4	0	0	0	0	0	0	9	3	Eukaryota	Rhizaria	Cercozoa	Filosa-Sarcomonadea	Cercomonadida	Cercomonadidae	Eocercomonas	Eocercomonas_echina	Flagellated cells
155	0	10	27	31	0	0	0	0	0	0	0	0	0	0	0	Eukaryota	Stramenopiles	Ochrophyta	Bacillariophyta	Bacillariophyta_X	Polar-centric-Mediophyceae	Thalassiosira	Thalassiosira_tenera	Bacillariophyta (Stramenopiles)
156	4	556	6	0	30	71	0	0	0	0	0	0	0	0	0	Eukaryota	Stramenopiles	Ochrophyta	Bacillariophyta	Bacillariophyta_X	Radial-centric-basal-Coscinodiscophyceae	Guinardia	Guinardia_flaccida	Bacillariophyta (Stramenopiles)
157	0	3	7	5	0	0	0	0	0	0	0	0	0	0	0	Eukaryota	Alveolata	Ciliophora	Spirotrichea	Tintinnida	Eutintinnidae	Eutintinnus	Eutintinnus_tubulosus	Ciliophora (Alveolata)
158	0	0	0	0	0	0	0	0	0	0	0	0	14	6	3	Eukaryota	Rhizaria	Cercozoa	Filosa-Thecofilosea	Filosa-Thecofilosea_X	Mataza-lineage	Mataza-lineage_X	Mataza-lineage_X_sp.	Flagellated cells
159	0	0	0	4	0	7	0	0	0	0	0	0	0	0	0	Eukaryota	Rhizaria	Cercozoa	Filosa-Thecofilosea	Filosa-Thecofilosea_X	Novel-Clade-4	Novel-Clade-4_X	Novel-Clade-4_X_sp.	Flagellated cells
160	0	0	27	31	0	0	0	0	0	0	0	0	0	0	0	Eukaryota	Alveolata	Ciliophora	Spirotrichea	Tintinnida	Tintinnidae	Amphorellopsis	Amphorellopsis_acuta	Ciliophora (Alveolata)
161	0	81	25	85	93	165	0	0	0	0	0	0	0	0	0	Eukaryota	Stramenopiles	Ochrophyta	Bacillariophyta	Bacillariophyta_X	Polar-centric-Mediophyceae	Thalassiosira	Thalassiosira_oceanica	Bacillariophyta (Stramenopiles)
162	0	0	0	0	0	0	0	494	312	0	27	78	0	0	0	Eukaryota	Rhizaria	Cercozoa	Filosa-Thecofilosea	Ebriida	TAGIRI1-lineage	TAGIRI1-lineage_X	TAGIRI1-lineage_X_sp.	Flagellated cells
164	0	0	0	0	0	0	3	0	0	0	0	0	0	2	8	Eukaryota	Alveolata	Dinoflagellata	Dinophyceae	Peridiniales	Thoracosphaeraceae	Pentapharsodinium	Pentapharsodinium_tyrrhenicum	Dinoflagellata (Alveolata)
167	0	0	0	0	0	13	0	0	0	0	0	0	0	0	0	Eukaryota	Rhizaria	Cercozoa	Filosa-Thecofilosea	Cryomonadida	Cryothecomonas-lineage	Cryothecomonas	Cryothecomonas_sp.	Flagellated cells
168	0	10	7	62	98	149	0	0	0	0	0	0	0	0	0	Eukaryota	Hacrobia	Katablepharidophyta	Katablepharidaceae	Katablepharidales	Katablepharidales_X	Katablepharidales_XX	Katablepharidales_XX_sp.	Flagellated cells
170	0	0	0	0	0	0	35	16	0	0	0	0	0	37	0	Eukaryota	Hacrobia	Haptophyta	Prymnesiophyceae	Prymnesiales	Chrysochromulinaceae	Chrysochromulina	Chrysochromulina_sp.	Flagellated cells
171	0	0	0	49	27	119	0	0	0	0	0	0	0	0	0	Eukaryota	Alveolata	Dinoflagellata	Dinophyceae	Gymnodiniales	Kareniaceae	Karlodinium	Karlodinium_veneficum	Dinoflagellata (Alveolata)
172	0	0	0	0	0	0	5	0	0	114	0	0	0	0	0	Eukaryota	Stramenopiles	Ochrophyta	Bacillariophyta	Bacillariophyta_X	Radial-centric-basal-Coscinodiscophyceae	Radial-centric-basal-Coscinodiscophyceae_X	Radial-centric-basal-Coscinodiscophyceae_X_sp.	Bacillariophyta (Stramenopiles)
173	7	188	39	0	0	0	0	0	0	0	0	0	0	0	0	Eukaryota	Alveolata	Dinoflagellata	Dinophyceae	Suessiales	Suessiaceae	Protodinium	Protodinium_simplex	Dinoflagellata (Alveolata)
174	0	0	0	0	0	0	0	57	0	0	0	0	0	0	0	Eukaryota	Rhizaria	Cercozoa	Filosa-Thecofilosea	Cryomonadida	Protaspa-lineage	Protaspa	Protaspa_grandis	Flagellated cells
175	0	0	0	0	0	0	0	0	7	0	6	0	0	0	0	Eukaryota	Stramenopiles	Ochrophyta	Chrysophyceae	Chrysophyceae_X	Chrysophyceae_Clade-G	Chrysophyceae_Clade-G_X	Chrysophyceae_Clade-G_X_sp.	Bacillariophyta (Stramenopiles)
176	0	0	0	317	18	47	0	0	0	0	0	0	0	0	0	Eukaryota	Stramenopiles	Ochrophyta	Bacillariophyta	Bacillariophyta_X	Polar-centric-Mediophyceae	Thalassiosira	Thalassiosira_hendeyi	Bacillariophyta (Stramenopiles)
177	0	0	0	0	0	0	0	46	0	0	71	0	0	0	0	Eukaryota	Alveolata	Ciliophora	Spirotrichea	Strombidiida_B	Strombidiida_B_X	Strombidiida_B_XX	Strombidiida_B_XX_sp.	Ciliophora (Alveolata)
178	0	0	0	0	0	0	435	58	20	0	0	0	0	1772	0	Eukaryota	Alveolata	Dinoflagellata	Dinophyceae	Dinophyceae_X	Dinophyceae_XX	Dinophyceae_XXX	Dinophyceae_XXX_sp.	Dinoflagellata (Alveolata)
179	11	0	0	0	0	0	0	0	0	0	0	0	0	0	0	Eukaryota	Rhizaria	Cercozoa	Filosa-Thecofilosea	Cryomonadida	Protaspa-lineage	Protaspa-lineage_X	Protaspa-lineage_X_sp.	Flagellated cells
181	0	0	0	0	0	0	0	0	0	0	0	74	64	0	0	Eukaryota	Rhizaria	Cercozoa	Filosa-Thecofilosea	Cryomonadida	Protaspa-lineage	Protaspa-lineage_X	Protaspa-lineage_X_sp.	Flagellated cells
182	0	0	0	0	0	0	68	0	0	0	0	0	0	0	0	Eukaryota	Opisthokonta	Mesomycetozoa	Ichthyosporea	Ichthyosphonida	Abeoformidae_Group_MAIP_2	Abeoformidae_Group_MAIP_2_X	Abeoformidae_Group_MAIP_2_X_sp.	Flagellated cells
183	0	0	0	0	0	14	0	0	0	0	0	0	0	0	0	Eukaryota	Alveolata	Ciliophora	Spirotrichea	Strombidiida	Strombidiidae_M	Strombidium_M	Strombidium_M_sp.	Ciliophora (Alveolata)
184	0	0	0	0	0	0	0	8	0	0	0	0	0	0	0	Eukaryota	Rhizaria	Cercozoa	Filosa-Imbricatea	Thaumatomonadida	Thaumatomonadidae	Reckertia	Reckertia_filosa	Flagellated cells
186	0	21	0	27	0	0	0	0	0	0	0	0	0	0	0	Eukaryota	Stramenopiles	Ochrophyta	Bacillariophyta	Bacillariophyta_X	Polar-centric-Mediophyceae	Thalassiosira	Thalassiosira_sp.	Bacillariophyta (Stramenopiles)
188	49	0	0	0	0	0	0	0	0	0	0	0	0	0	0	Eukaryota	Opisthokonta	Mesomycetozoa	Ichthyosporea	Ichthyosphonida	Abeoformidae_Group_MAIP_2	Abeoformidae_Group_MAIP_2_X	Abeoformidae_Group_MAIP_2_X_sp.	Flagellated cells
189	0	0	0	0	0	0	0	15	0	0	0	0	0	0	0	Eukaryota	Alveolata	Ciliophora	CONThreeP	CONThreeP_X	Plagiocampidae	Plagiocampa	Plagiocampa_sp.	Ciliophora (Alveolata)
190	0	0	0	0	0	0	0	0	0	0	0	0	0	9	0	Eukaryota	Rhizaria	Cercozoa	Filosa-Imbricatea	Marimonadida	Marimonadida_X	Marimonadida_XX	Marimonadida_XX_sp.	Flagellated cells
191	0	0	0	0	0	0	0	0	0	49	18	22	0	0	0	Eukaryota	Alveolata	Dinoflagellata	Syndiniales	Dino-Group-I	Dino-Group-I-Clade-4	Dino-Group-I-Clade-4_X	Dino-Group-I-Clade-4_X_sp.	Dinoflagellata (Alveolata)
192	0	66	0	0	0	0	0	0	0	0	0	0	0	0	0	Eukaryota	Alveolata	Dinoflagellata	Noctilucophyceae	Noctilucales	Noctilucaceae	Noctiluca	Noctiluca_scintillans	Dinoflagellata (Alveolata)
193	0	0	0	0	0	11	0	0	0	0	0	0	0	0	0	Eukaryota	Rhizaria	Cercozoa	Cercozoa_X	Cercozoa_XX	Cercozoa_XXX	Cercozoa_XXXX	Cercozoa_XXXX_sp.	Flagellated cells
194	0	0	0	0	0	0	0	0	0	0	0	0	0	77	0	Eukaryota	Rhizaria	Cercozoa	Filosa-Thecofilosea	Cryomonadida	Protaspa-lineage	Protaspa-lineage_X	Protaspa-lineage_X_sp.	Flagellated cells
196	0	0	0	0	0	40	0	0	0	0	0	0	0	0	0	Eukaryota	Alveolata	Dinoflagellata	Dinophyceae	Dinophyceae_X	Dinophyceae_XX	Dinophyceae_XXX	Dinophyceae_XXX_sp.	Dinoflagellata (Alveolata)
197	0	0	0	0	0	0	0	25	10	0	0	0	0	0	0	Eukaryota	Rhizaria	Cercozoa	Filosa-Thecofilosea	Cryomonadida	Protaspa-lineage	Protaspa-lineage_X	Protaspa-lineage_X_sp.	Flagellated cells
198	0	0	0	0	0	0	0	16	0	0	0	0	0	0	0	Eukaryota	Alveolata	Ciliophora	CONThreeP	CONThreeP_X	CONThreeP_XX	Askenasia	Askenasia_sp.	Ciliophora (Alveolata)
199	0	0	0	5	11	0	0	0	0	0	0	0	0	0	0	Eukaryota	Alveolata	Dinoflagellata	Dinophyceae	Peridiniales	Diplopsalidaceae	Diplopsalis	Diplopsalis_caspica	Dinoflagellata (Alveolata)
200	0	0	0	0	0	0	0	0	0	0	0	0	6	0	0	Eukaryota	Alveolata	Dinoflagellata	Dinophyceae	Dinophyceae_X	Dinophyceae_XX	Dinophyceae_XXX	Dinophyceae_XXX_sp.	Dinoflagellata (Alveolata)
201	0	0	0	30	0	0	0	0	0	0	0	0	0	0	0	Eukaryota	Opisthokonta	Mesomycetozoa	Ichthyosporea	Ichthyosphonida	Abeoformidae_Group_MAIP_2	Abeoformidae_Group_MAIP_2_X	Abeoformidae_Group_MAIP_2_X_sp.	Flagellated cells
202	0	0	0	0	0	54	0	0	0	0	0	0	0	0	0	Eukaryota	Stramenopiles	Ochrophyta	Bacillariophyta	Bacillariophyta_X	Polar-centric-Mediophyceae	Thalassiosira	Thalassiosira_sp.	Bacillariophyta (Stramenopiles)
203	0	4	0	20	9	10	0	0	0	0	0	0	0	0	0	Eukaryota	Alveolata	Ciliophora	CONThreeP	CONThreeP_X	Urotrichidae	Urotricha	Urotricha_sp.	Ciliophora (Alveolata)
204	0	0	0	8	0	22	0	0	0	0	0	0	0	0	0	Eukaryota	Alveolata	Dinoflagellata	Dinophyceae	Gymnodiniales	Gymnodiniaceae	Gyrodinium	Gyrodinium_sp.	Dinoflagellata (Alveolata)
205	0	0	0	0	0	0	54	129	18	17	32	0	7	0	0	Eukaryota	Hacrobia	Katablepharidophyta	Katablepharidaceae	Katablepharidales	Katablepharidales_X	Katablepharidales_XX	Katablepharidales_XX_sp.	Flagellated cells
206	0	0	0	0	0	0	19	0	0	0	0	0	0	0	0	Eukaryota	Alveolata	Dinoflagellata	Syndiniales	Dino-Group-II	Dino-Group-II-Clade-1	Dino-Group-II-Clade-1_X	Dino-Group-II-Clade-1_X_sp.	Dinoflagellata (Alveolata)
207	0	0	0	0	0	0	28	14	9	0	17	5	0	0	8	Eukaryota	Stramenopiles	Ochrophyta	Chrysophyceae	Chrysophyceae_X	Chrysophyceae_Clade-H	Chrysophyceae_Clade-H_X	Chrysophyceae_Clade-H_X_sp.	Bacillariophyta (Stramenopiles)
208	23	0	0	0	0	0	0	0	0	0	0	0	0	0	0	Eukaryota	Alveolata	Dinoflagellata	Dinophyceae	Gymnodiniales	Gymnodiniaceae	Gyrodinium	Gyrodinium_sp.	Dinoflagellata (Alveolata)
209	0	0	0	0	0	0	0	22	0	0	0	0	0	0	0	Eukaryota	Stramenopiles	Opalozoa	MAST-3	MAST-3A	MAST-3A_X	MAST-3A_XX	MAST-3A_XX_sp.	Bacillariophyta (Stramenopiles)
210	0	0	0	0	0	0	4	0	0	0	0	0	0	0	0	Eukaryota	Alveolata	Dinoflagellata	Syndiniales	Dino-Group-II	Dino-Group-II-Clade-1	Dino-Group-II-Clade-1_X	Dino-Group-II-Clade-1_X_sp.	Dinoflagellata (Alveolata)
211	0	0	0	0	61	942	0	0	0	0	0	0	0	0	0	Eukaryota	Alveolata	Dinoflagellata	Dinophyceae	Peridiniales	Heterocapsaceae	Heterocapsa	Heterocapsa_nei/rotundata	Dinoflagellata (Alveolata)
213	0	0	0	0	0	47	0	0	0	0	0	0	0	0	0	Eukaryota	Stramenopiles	Ochrophyta	Chrysophyceae	Chrysophyceae_X	Chrysophyceae_Clade-H	Chrysophyceae_Clade-H_X	Chrysophyceae_Clade-H_X_sp.	Bacillariophyta (Stramenopiles)
214	0	0	0	0	0	0	0	39	12	0	0	0	0	0	0	Eukaryota	Alveolata	Ciliophora	CONThreeP	CONThreeP_X	CONThreeP_XX	Askenasia	Askenasia_sp.	Ciliophora (Alveolata)
216	0	0	0	0	0	0	17	0	0	0	36	0	0	0	0	Eukaryota	Stramenopiles	Ochrophyta	Chrysophyceae	Chrysophyceae_X	Chrysophyceae_Clade-H	Chrysophyceae_Clade-H_X	Chrysophyceae_Clade-H_X_sp.	Bacillariophyta (Stramenopiles)
217	0	0	4	28	43	37	0	0	0	0	0	0	0	0	0	Eukaryota	Stramenopiles	Stramenopiles_X	Stramenopiles_X-Group-7	Stramenopiles_X-Group-7_X	Stramenopiles_X-Group-7_XX	Stramenopiles_X-Group-7_XXX	Stramenopiles_X-Group-7_XXX_sp.	Bacillariophyta (Stramenopiles)
218	0	0	0	14	0	0	0	0	0	0	0	0	0	0	0	Eukaryota	Rhizaria	Cercozoa	Filosa-Thecofilosea	Cryomonadida	Cryothecomonas-lineage	Cryothecomonas	Cryothecomonas_aestivalis	Flagellated cells
219	0	0	0	0	0	0	0	0	0	0	22	0	7	40	0	Eukaryota	Rhizaria	Cercozoa	Filosa-Thecofilosea	Cryomonadida	Protaspa-lineage	Protaspa-lineage_X	Protaspa-lineage_X_sp.	Flagellated cells
220	8	0	0	0	0	0	0	0	0	0	0	0	0	0	0	Eukaryota	Archaeplastida	Chlorophyta	Mamiellophyceae	Dolichomastigales	Dolichomastigaceae	Dolichomastigaceae-B	Dolichomastigaceae-B_sp.	Flagellated cells
221	0	0	0	0	8	62	0	0	0	0	0	0	0	0	0	Eukaryota	Alveolata	Dinoflagellata	Dinophyceae	Gymnodiniales	Kareniaceae	Karlodinium	Karlodinium_veneficum	Dinoflagellata (Alveolata)
223	0	0	0	0	0	0	0	0	0	0	34	0	0	0	0	Eukaryota	Stramenopiles	Ochrophyta	Chrysophyceae	Chrysophyceae_X	Chrysophyceae_Clade-H	Chrysophyceae_Clade-H_X	Chrysophyceae_Clade-H_X_sp.	Bacillariophyta (Stramenopiles)
224	0	0	0	3	0	4	0	0	0	0	0	0	0	0	0	Eukaryota	Rhizaria	Cercozoa	Filosa-Thecofilosea	Cryomonadida	Protaspa-lineage	Protaspa-lineage_X	Protaspa-lineage_X_sp.	Flagellated cells
227	0	0	0	0	0	0	0	0	0	0	0	0	0	0	51	Eukaryota	Alveolata	Ciliophora	CONThreeP	CONThreeP_X	CONThreeP_XX	Askenasia	Askenasia_sp.	Ciliophora (Alveolata)
228	0	41	0	0	0	0	0	0	0	0	0	0	0	0	0	Eukaryota	Rhizaria	Cercozoa	Filosa-Thecofilosea	Cryomonadida	Cryothecomonas-lineage	Cryothecomonas	Cryothecomonas_aestivalis	Flagellated cells
229	0	0	0	0	0	0	0	0	5	0	0	0	0	0	0	Eukaryota	Rhizaria	Cercozoa	Filosa-Thecofilosea	Cryomonadida	Protaspa-lineage	Protaspa	Protaspa_grandis	Flagellated cells
230	0	0	8	0	0	0	0	0	0	0	0	0	0	0	0	Eukaryota	Alveolata	Ciliophora	Spirotrichea	Tintinnida	TIN_02	Rhizodomus	Rhizodomus_tagatzi	Ciliophora (Alveolata)
231	0	10	0	0	0	0	0	0	0	0	0	0	0	0	0	Eukaryota	Opisthokonta	Mesomycetozoa	Ichthyosporea	Ichthyosphonida	Abeoformidae_Group_MAIP_2	Abeoformidae_Group_MAIP_2_X	Abeoformidae_Group_MAIP_2_X_sp.	Flagellated cells
232	0	0	0	0	0	0	0	0	0	0	0	0	3	7	0	Eukaryota	Rhizaria	Cercozoa	Filosa-Thecofilosea	Filosa-Thecofilosea_X	Novel-Clade-4	Novel-Clade-4_X	Novel-Clade-4_X_sp.	Flagellated cells
233	0	31	0	0	0	0	0	0	0	0	0	0	0	0	0	Eukaryota	Alveolata	Ciliophora	CONThreeP	CONThreeP_X	CONThreeP_XX	Askenasia	Askenasia_sp.	Ciliophora (Alveolata)
234	0	0	0	0	0	0	14	2	40	20	3	0	9	22	0	Eukaryota	Stramenopiles	Ochrophyta	Bacillariophyta	Bacillariophyta_X	Polar-centric-Mediophyceae	Thalassiosira	Thalassiosira_sp.	Bacillariophyta (Stramenopiles)
237	0	0	0	0	0	0	0	28	0	0	0	0	3	0	0	Eukaryota	Alveolata	Dinoflagellata	Dinophyceae	Dinophyceae_X	Dinophyceae_XX	Dinophyceae_XXX	Dinophyceae_XXX_sp.	Dinoflagellata (Alveolata)
238	0	0	0	0	0	0	0	5	0	0	0	0	0	0	0	Eukaryota	Rhizaria	Cercozoa	Filosa-Thecofilosea	Ebriida	Botuliformidae	Botuliforma	Botuliforma_benthica	Flagellated cells
239	0	0	0	0	0	0	532	135	16	42	28	0	8	0	0	Eukaryota	Alveolata	Dinoflagellata	Dinophyceae	Peridiniales	Heterocapsaceae	Heterocapsa	Heterocapsa_nei/rotundata	Dinoflagellata (Alveolata)
242	0	0	0	0	0	0	7	0	0	0	0	0	0	0	0	Eukaryota	Stramenopiles	Ochrophyta	Bolidophyceae	Parmales	Parmales_env_3	Parmales_env_3_X	Parmales_env_3_X_sp.	Bacillariophyta (Stramenopiles)
243	0	0	0	0	0	0	0	26	0	6	14	0	0	0	0	Eukaryota	Stramenopiles	Ochrophyta	Chrysophyceae	Chrysophyceae_X	Chrysophyceae_Clade-H	Chrysophyceae_Clade-H_X	Chrysophyceae_Clade-H_X_sp.	Bacillariophyta (Stramenopiles)
247	0	0	0	0	0	0	0	0	77	0	21	23	0	0	0	Eukaryota	Stramenopiles	Ochrophyta	Bacillariophyta	Bacillariophyta_X	Polar-centric-Mediophyceae	Thalassiosira	Thalassiosira_sp.	Bacillariophyta (Stramenopiles)
248	0	0	0	0	0	0	0	0	0	0	0	12	0	0	0	Eukaryota	Archaeplastida	Chlorophyta	Mamiellophyceae	Dolichomastigales	Dolichomastigaceae	Dolichomastigaceae-B	Dolichomastigaceae-B_sp.	Flagellated cells
249	0	0	0	0	0	0	0	0	0	0	8	0	0	0	0	Eukaryota	Alveolata	Ciliophora	Spirotrichea	Choreotrichida	Strobilidiidae_A	Strobilidiidae_A_X	Strobilidiidae_A_X_sp.	Ciliophora (Alveolata)
250	0	0	0	0	0	0	11	70	67	0	182	0	48	0	0	Eukaryota	Rhizaria	Cercozoa	Filosa-Thecofilosea	Cryomonadida	Cryothecomonas-lineage	Cryothecomonas	Cryothecomonas_aestivalis	Flagellated cells
251	0	14	0	0	0	0	0	0	0	0	0	0	0	0	0	Eukaryota	Alveolata	Dinoflagellata	Syndiniales	Dino-Group-II	Dino-Group-II-Clade-1	Dino-Group-II-Clade-1_X	Dino-Group-II-Clade-1_X_sp.	Dinoflagellata (Alveolata)
252	0	0	0	0	0	0	0	0	0	0	0	0	0	0	7	Eukaryota	Rhizaria	Cercozoa	Filosa-Thecofilosea	Ventricleftida	Ventrifissuridae	Ventrifissuridae_X	Ventrifissuridae_X_sp.	Flagellated cells
253	0	0	0	0	0	0	0	0	0	0	27	0	0	0	49	Eukaryota	Alveolata	Dinoflagellata	Noctilucophyceae	Noctilucales	Noctilucaceae	Noctiluca	Noctiluca_scintillans	Dinoflagellata (Alveolata)
254	0	0	0	0	0	0	124	0	0	0	141	31	6	1003	0	Eukaryota	Alveolata	Ciliophora	Spirotrichea	Strombidiida	Strombidiidae_M	Strombidiidae_M_X	Strombidiidae_M_X_sp.	Ciliophora (Alveolata)
256	0	0	0	0	0	0	0	0	0	0	18	0	16	0	0	Eukaryota	Stramenopiles	Ochrophyta	Chrysophyceae	Chrysophyceae_X	Chrysophyceae_Clade-H	Chrysophyceae_Clade-H_X	Chrysophyceae_Clade-H_X_sp.	Bacillariophyta (Stramenopiles)
258	0	0	0	0	5	1	0	0	0	0	0	0	0	0	0	Eukaryota	Alveolata	Ciliophora	Spirotrichea	Strombidiida_G	Strombidiida_G_X	Strombidiida_G_XX	Strombidiida_G_XX_sp.	Ciliophora (Alveolata)
259	0	0	0	0	0	0	153	545	486	23	115	332	2	79	0	Eukaryota	Stramenopiles	Ochrophyta	Bacillariophyta	Bacillariophyta_X	Polar-centric-Mediophyceae	Thalassiosira	Thalassiosira_sp.	Bacillariophyta (Stramenopiles)
260	0	0	0	0	0	24	0	0	0	0	0	0	0	0	0	Eukaryota	Alveolata	Dinoflagellata	Syndiniales	Dino-Group-II	Dino-Group-II-Clade-13	Dino-Group-II-Clade-13_X	Dino-Group-II-Clade-13_X_sp.	Dinoflagellata (Alveolata)
261	0	0	0	0	0	0	0	66	347	0	0	0	0	0	0	Eukaryota	Alveolata	Ciliophora	Spirotrichea	Choreotrichida	Strombidinopsidae	Parastrombidinopsis	Parastrombidinopsis_shimi	Ciliophora (Alveolata)
262	0	124	40	26	21	0	0	0	0	0	0	0	0	0	0	Eukaryota	Alveolata	Dinoflagellata	Dinophyceae	Gymnodiniales	Gymnodiniaceae	Bispinodinium	Bispinodinium_angelaceum	Dinoflagellata (Alveolata)
263	0	0	0	0	0	0	9	0	0	0	0	0	0	0	0	Eukaryota	Alveolata	Dinoflagellata	Syndiniales	Dino-Group-II	Dino-Group-II-Clade-22	Dino-Group-II-Clade-22_X	Dino-Group-II-Clade-22_X_sp.	Dinoflagellata (Alveolata)
264	0	0	0	0	0	0	0	18	8	0	85	0	0	0	0	Eukaryota	Alveolata	Ciliophora	Spirotrichea	Choreotrichida	Leegaardiellidae_B	Leegaardiella	Leegaardiella_sp.	Ciliophora (Alveolata)
267	0	22	0	0	5	40	0	0	0	0	0	0	0	0	0	Eukaryota	Alveolata	Dinoflagellata	Syndiniales	Dino-Group-II	Dino-Group-II-Clade-8	Dino-Group-II-Clade-8_X	Dino-Group-II-Clade-8_X_sp.	Dinoflagellata (Alveolata)
268	0	0	0	0	0	0	8	0	0	0	0	0	0	0	0	Eukaryota	Rhizaria	Cercozoa	Filosa-Imbricatea	Marimonadida	Marimonadida_X	Marimonadida_XX	Marimonadida_XX_sp.	Flagellated cells
269	0	0	0	0	0	15	0	0	0	0	0	0	0	0	0	Eukaryota	Alveolata	Dinoflagellata	Dinophyceae	Dinophyceae_X	Dinophyceae_XX	Dinophyceae_XXX	Dinophyceae_XXX_sp.	Dinoflagellata (Alveolata)
270	0	0	0	0	0	0	3	16	0	3	3	0	0	0	13	Eukaryota	Rhizaria	Cercozoa	Chlorarachniophyceae	Chlorarachniophyceae_X	NPK2-lineage	NPK2-lineage_X	NPK2-lineage_X_sp.	Flagellated cells
272	0	0	0	0	0	0	0	0	0	0	20	31	0	0	0	Eukaryota	Alveolata	Dinoflagellata	Syndiniales	Dino-Group-I	Dino-Group-I-Clade-4	Dino-Group-I-Clade-4_X	Dino-Group-I-Clade-4_X_sp.	Dinoflagellata (Alveolata)
274	0	0	0	0	0	0	0	0	0	0	41	0	0	0	0	Eukaryota	Stramenopiles	Ochrophyta	Chrysophyceae	Chrysophyceae_X	Chrysophyceae_Clade-H	Chrysophyceae_Clade-H_X	Chrysophyceae_Clade-H_X_sp.	Bacillariophyta (Stramenopiles)
275	0	0	0	0	0	0	0	4	6	0	0	0	0	0	0	Eukaryota	Stramenopiles	Opalozoa	MAST-3	MAST-3J	MAST-3J_X	MAST-3J_XX	MAST-3J_XX_sp.	Bacillariophyta (Stramenopiles)
277	14	0	0	0	0	0	0	0	0	0	0	0	0	0	0	Eukaryota	Alveolata	Ciliophora	Spirotrichea	Choreotrichida	Strobilidiidae_G	Strobilidiidae_G_X	Strobilidiidae_G_X_sp.	Ciliophora (Alveolata)
279	0	0	0	0	0	0	0	73	41	0	21	0	0	0	0	Eukaryota	Hacrobia	Katablepharidophyta	Katablepharidaceae	Katablepharidales	Katablepharidales_X	Katablepharidales_XX	Katablepharidales_XX_sp.	Flagellated cells
280	0	0	0	7	0	3	0	0	0	0	0	0	0	0	0	Eukaryota	Stramenopiles	Ochrophyta	Chrysophyceae	Chrysophyceae_X	Chrysophyceae_Clade-H	Chrysophyceae_Clade-H_X	Chrysophyceae_Clade-H_X_sp.	Bacillariophyta (Stramenopiles)
281	0	0	0	0	0	9	0	0	0	0	0	0	0	0	0	Eukaryota	Stramenopiles	Ochrophyta	Chrysophyceae	Chrysophyceae_X	Chrysophyceae_Clade-H	Chrysophyceae_Clade-H_X	Chrysophyceae_Clade-H_X_sp.	Bacillariophyta (Stramenopiles)
282	0	0	0	0	0	0	0	0	10	0	0	0	0	0	0	Eukaryota	Stramenopiles	Ochrophyta	Chrysophyceae	Chrysophyceae_X	Chrysophyceae_Clade-H	Chrysophyceae_Clade-H_X	Chrysophyceae_Clade-H_X_sp.	Bacillariophyta (Stramenopiles)
283	0	7	3	33	13	0	0	0	0	0	0	0	0	0	0	Eukaryota	Rhizaria	Cercozoa	Filosa-Sarcomonadea	Glissomonadida	Allapsidae	Viridiraptor	Viridiraptor_sp.	Flagellated cells
284	0	0	0	0	0	0	27	0	0	0	0	0	0	0	0	Eukaryota	Alveolata	Dinoflagellata	Syndiniales	Dino-Group-II	Dino-Group-II-Clade-5	Dino-Group-II-Clade-5_X	Dino-Group-II-Clade-5_X_sp.	Dinoflagellata (Alveolata)
285	0	0	0	0	0	6	0	0	0	0	0	0	0	0	0	Eukaryota	Rhizaria	Cercozoa	Filosa-Imbricatea	Euglyphida	Euglyphida_X	Euglyphida_XX	Euglyphida_XX_sp.	Flagellated cells
287	0	0	0	0	0	0	426	206	75	1524	2495	253	2885	450	0	Eukaryota	Hacrobia	Haptophyta	Prymnesiophyceae	Phaeocystales	Phaeocystaceae	Phaeocystis	Phaeocystis_globosa	Flagellated cells
289	237	0	0	0	0	0	0	0	0	0	0	0	0	0	0	Eukaryota	Amoebozoa	Conosa	Mycetozoa-Myxogastrea	Stemonitales-Physarales	Stemonitales-Physarales_X	Kelleromyxa	Kelleromyxa_fimicola	Flagellated cells
291	0	0	0	16	12	0	0	0	0	0	0	0	0	0	0	Eukaryota	Rhizaria	Cercozoa	Filosa-Thecofilosea	Cryomonadida	Cryothecomonas-lineage	Cryothecomonas	Cryothecomonas_aestivalis	Flagellated cells
292	0	0	0	0	0	0	0	157	873	0	196	0	0	0	0	Eukaryota	Alveolata	Ciliophora	Spirotrichea	Choreotrichida	Strombidinopsidae	Parastrombidinopsis	Parastrombidinopsis_sp.	Ciliophora (Alveolata)
293	0	12	0	0	0	0	0	0	0	0	0	0	0	0	0	Eukaryota	Rhizaria	Cercozoa	Filosa-Thecofilosea	Cryomonadida	Protaspa-lineage	Protaspa-lineage_X	Protaspa-lineage_X_sp.	Flagellated cells
295	0	0	0	0	0	0	0	6	0	0	0	0	0	0	0	Eukaryota	Alveolata	Dinoflagellata	Syndiniales	Dino-Group-II	Dino-Group-II-Clade-22	Dino-Group-II-Clade-22_X	Dino-Group-II-Clade-22_X_sp.	Dinoflagellata (Alveolata)
296	0	0	0	0	0	0	138	0	0	0	1	0	0	39	0	Eukaryota	Alveolata	Ciliophora	Spirotrichea	Choreotrichida	Strobilidiidae_I	Pelagostrobilidium	Pelagostrobilidium_minutum	Ciliophora (Alveolata)
297	0	0	13	30	17	0	0	0	0	0	0	0	0	0	0	Eukaryota	Stramenopiles	Ochrophyta	Bacillariophyta	Bacillariophyta_X	Raphid-pennate	Pleurosigma	Pleurosigma_intermedium	Bacillariophyta (Stramenopiles)
298	0	0	0	0	0	0	0	0	0	0	0	0	923	347	0	Eukaryota	Alveolata	Dinoflagellata	Dinophyceae	Dinophyceae_X	Dinophyceae_XX	Dinophyceae_XXX	Dinophyceae_XXX_sp.	Dinoflagellata (Alveolata)
299	0	0	0	0	0	13	0	0	0	0	0	0	0	0	0	Eukaryota	Alveolata	Dinoflagellata	Syndiniales	Dino-Group-II	Dino-Group-II-Clade-14	Dino-Group-II-Clade-14_X	Dino-Group-II-Clade-14_X_sp.	Dinoflagellata (Alveolata)
300	0	0	0	0	0	0	0	39	0	0	0	0	0	0	0	Eukaryota	Alveolata	Ciliophora	Spirotrichea	Strombidiida	Strombidiidae	Strombidiidae_X	Strombidiidae_X_sp.	Ciliophora (Alveolata)
301	0	0	0	0	0	0	0	0	0	0	0	0	4	14	0	Eukaryota	Rhizaria	Cercozoa	Chlorarachniophyceae	Chlorarachniophyceae_X	NPK2-lineage	NPK2-lineage_X	NPK2-lineage_X_sp.	Flagellated cells
302	0	0	6	16	2	4	0	0	0	0	0	0	0	0	0	Eukaryota	Rhizaria	Cercozoa	Filosa-Thecofilosea	Cryomonadida	Rhogostoma-lineage	Rhogostoma	Rhogostoma_minus	Flagellated cells
303	0	8	0	0	0	0	0	0	0	0	0	0	0	0	0	Eukaryota	Alveolata	Dinoflagellata	Syndiniales	Dino-Group-II	Dino-Group-II-Clade-2	Dino-Group-II-Clade-2_X	Dino-Group-II-Clade-2_X_sp.	Dinoflagellata (Alveolata)
304	0	0	0	0	0	9	0	0	0	0	0	0	0	0	0	Eukaryota	Rhizaria	Cercozoa	Cercozoa_X	Cercozoa_XX	Cercozoa_XXX	Cercozoa_XXXX	Cercozoa_XXXX_sp.	Flagellated cells
305	0	0	0	0	0	0	0	17	0	0	0	0	0	0	0	Eukaryota	Rhizaria	Cercozoa	Filosa-Thecofilosea	Cryomonadida	Protaspa-lineage	Protaspa	Protaspa_grandis	Flagellated cells
306	0	0	0	0	0	0	0	0	0	0	0	0	0	19	0	Eukaryota	Rhizaria	Cercozoa	Filosa-Thecofilosea	Cryomonadida	Protaspa-lineage	Protaspa-lineage_X	Protaspa-lineage_X_sp.	Flagellated cells
308	0	0	0	0	0	22	0	0	0	0	0	0	0	0	0	Eukaryota	Alveolata	Dinoflagellata	Dinophyceae	Dinophyceae_X	Dinophyceae_XX	Dinophyceae_XXX	Dinophyceae_XXX_sp.	Dinoflagellata (Alveolata)
309	0	0	0	0	0	0	55	0	52	21	75	0	0	0	0	Eukaryota	Alveolata	Ciliophora	Spirotrichea	Strombidiida_B	Strombidiida_B_X	Strombidiida_B_XX	Strombidiida_B_XX_sp.	Ciliophora (Alveolata)
310	0	0	0	0	0	11	0	0	0	0	0	0	0	0	0	Eukaryota	Alveolata	Ciliophora	Spirotrichea	Strombidiida	Strombidiidae_H	Strombidiidae_H_X	Strombidiidae_H_X_sp.	Ciliophora (Alveolata)
312	0	0	0	0	0	0	0	25	5	0	0	0	0	0	0	Eukaryota	Alveolata	Dinoflagellata	Dinophyceae	Dinophyceae_X	Dinophyceae_XX	Dinophyceae_XXX	Dinophyceae_XXX_sp.	Dinoflagellata (Alveolata)
314	0	0	3	0	15	0	0	0	0	0	0	0	0	0	0	Eukaryota	Alveolata	Dinoflagellata	Dinophyceae	Peridiniales	Amphidiniopsidaceae	Islandinium	Islandinium_tricingulatum	Dinoflagellata (Alveolata)
315	0	0	0	0	0	0	0	0	0	0	5	0	0	0	0	Eukaryota	Rhizaria	Cercozoa	Filosa-Thecofilosea	Cryomonadida	Protaspa-lineage	Protaspa	Protaspa_grandis	Flagellated cells
316	0	0	0	0	0	15	0	0	0	0	0	0	0	0	0	Eukaryota	Stramenopiles	Opalozoa	MAST-3	MAST-3A	MAST-3A_X	MAST-3A_XX	MAST-3A_XX_sp.	Bacillariophyta (Stramenopiles)
317	0	0	0	0	0	12	0	0	0	0	0	0	0	0	0	Eukaryota	Alveolata	Ciliophora	Spirotrichea	Strombidiida_G	Strombidiida_G_X	Strombidiida_G_XX	Strombidiida_G_XX_sp.	Ciliophora (Alveolata)
318	0	0	0	0	0	0	5	22	89	0	16	4	0	0	0	Eukaryota	Stramenopiles	Ochrophyta	Bacillariophyta	Bacillariophyta_X	Polar-centric-Mediophyceae	Thalassiosira	Thalassiosira_allenii	Bacillariophyta (Stramenopiles)
319	0	0	0	22	0	0	0	0	0	0	0	0	0	0	0	Eukaryota	Opisthokonta	Mesomycetozoa	Ichthyosporea	Ichthyosphonida	Ichthyophonidae_Eccrinales	Eccrinidus	Eccrinidus_flexilis	Flagellated cells
320	0	0	0	19	0	0	0	0	0	0	0	0	0	0	0	Eukaryota	Rhizaria	Cercozoa	Filosa-Thecofilosea	Ventricleftida	Ventrifissuridae	Ventrifissuridae_X	Ventrifissuridae_X_sp.	Flagellated cells
321	0	0	0	0	0	0	7	0	0	0	4	0	0	0	0	Eukaryota	Rhizaria	Cercozoa	Filosa-Thecofilosea	Cryomonadida	Protaspa-lineage	Protaspa-lineage_X	Protaspa-lineage_X_sp.	Flagellated cells
322	0	0	0	0	0	0	35	81	843	19	104	209	0	22	0	Eukaryota	Rhizaria	Cercozoa	Filosa-Thecofilosea	Cryomonadida	Protaspa-lineage	Protaspa-lineage_X	Protaspa-lineage_X_sp.	Flagellated cells
323	0	0	103	0	12	0	0	0	0	0	0	0	0	0	0	Eukaryota	Alveolata	Dinoflagellata	Dinophyceae	Peridiniales	Thoracosphaeraceae	Scrippsiella	Scrippsiella_acuminata	Dinoflagellata (Alveolata)
324	0	94	106	37	25	67	0	0	0	0	0	0	0	0	0	Eukaryota	Stramenopiles	Ochrophyta	Bacillariophyta	Bacillariophyta_X	Polar-centric-Mediophyceae	Thalassiosira	Thalassiosira_sp.	Bacillariophyta (Stramenopiles)
328	452	76	0	0	0	361	0	0	0	0	0	0	0	0	0	Eukaryota	Hacrobia	Haptophyta	Prymnesiophyceae	Phaeocystales	Phaeocystaceae	Phaeocystis	Phaeocystis_globosa	Flagellated cells
329	0	0	0	18	76	13	0	0	0	0	0	0	0	0	0	Eukaryota	Alveolata	Dinoflagellata	Dinophyceae	Gymnodiniales	Gymnodiniaceae	Gyrodinium	Gyrodinium_heterogrammum	Dinoflagellata (Alveolata)
330	22	0	0	0	0	0	0	0	0	0	0	0	0	0	0	Eukaryota	Alveolata	Ciliophora	Phyllopharyngea	Suctoria	Ephelotidae	Ephelota	Ephelota_mammillata	Ciliophora (Alveolata)
331	0	0	0	0	7	0	0	0	0	0	0	0	0	0	0	Eukaryota	Rhizaria	Cercozoa	Filosa-Thecofilosea	Cryomonadida	Protaspa-lineage	Protaspa-lineage_X	Protaspa-lineage_X_sp.	Flagellated cells
332	0	0	0	0	0	0	35	6	0	7	5	0	0	0	0	Eukaryota	Alveolata	Ciliophora	Spirotrichea	Choreotrichida	Lynnellidae	Lynnella	Lynnella_semiglobulosa	Ciliophora (Alveolata)
333	13	0	0	0	0	0	0	0	0	0	0	0	0	0	0	Eukaryota	Rhizaria	Cercozoa	Filosa-Thecofilosea	Filosa-Thecofilosea_X	Mataza-lineage	Mataza-lineage_X	Mataza-lineage_X_sp.	Flagellated cells
335	0	0	0	0	15	20	0	0	0	0	0	0	0	0	0	Eukaryota	Hacrobia	Katablepharidophyta	Katablepharidaceae	Katablepharidales	Katablepharidales_X	Katablepharidales_XX	Katablepharidales_XX_sp.	Flagellated cells
336	0	0	6	5	0	6	0	0	0	0	0	0	0	0	0	Eukaryota	Stramenopiles	Ochrophyta	Bacillariophyta	Bacillariophyta_X	Raphid-pennate	Navicula	Navicula_cryptocephala_var._veneta	Bacillariophyta (Stramenopiles)
337	0	0	14	0	0	0	0	0	0	0	0	0	0	0	0	Eukaryota	Alveolata	Dinoflagellata	Dinophyceae	Suessiales	Suessiaceae	Protodinium	Protodinium_simplex	Dinoflagellata (Alveolata)
338	0	0	0	0	0	0	0	7	19	17	0	0	0	0	0	Eukaryota	Stramenopiles	Ochrophyta	Bacillariophyta	Bacillariophyta_X	Radial-centric-basal-Coscinodiscophyceae	Rhizosolenia	Rhizosolenia_setigera	Bacillariophyta (Stramenopiles)
340	0	0	0	0	27	20	0	0	0	0	0	0	0	0	0	Eukaryota	Alveolata	Dinoflagellata	Dinophyceae	Dinophyceae_X	Dinophyceae_XX	Dinophyceae_XXX	Dinophyceae_XXX_sp.	Dinoflagellata (Alveolata)
341	0	0	0	0	0	0	9	0	0	0	0	0	0	0	0	Eukaryota	Alveolata	Ciliophora	Spirotrichea	Strombidiida_G	Strombidiida_G_X	Strombidiida_G_XX	Strombidiida_G_XX_sp.	Ciliophora (Alveolata)
342	0	0	0	0	0	0	0	0	0	0	8	0	0	0	0	Eukaryota	Stramenopiles	Ochrophyta	Chrysophyceae	Chrysophyceae_X	Chrysophyceae_Clade-H	Chrysophyceae_Clade-H_X	Chrysophyceae_Clade-H_X_sp.	Bacillariophyta (Stramenopiles)
343	0	0	0	0	0	0	0	2	6	0	0	0	0	0	0	Eukaryota	Rhizaria	Cercozoa	Filosa-Sarcomonadea	Glissomonadida	Sandonidae	Sandonidae_X	Sandonidae_X_sp.	Flagellated cells
344	0	0	0	0	0	0	0	0	0	0	0	0	0	7	0	Eukaryota	Rhizaria	Cercozoa	Filosa-Thecofilosea	Ventricleftida	Ventrifissuridae	Ventrifissura	Ventrifissura_artocarpoidea	Flagellated cells
345	0	0	0	0	0	5	0	0	0	0	0	0	0	0	0	Eukaryota	Stramenopiles	Ochrophyta	Bacillariophyta	Bacillariophyta_X	Polar-centric-Mediophyceae	Chaetoceros	Chaetoceros_eibenii	Bacillariophyta (Stramenopiles)
346	0	0	0	0	0	0	0	9	0	0	0	0	7	0	0	Eukaryota	Stramenopiles	Opalozoa	MAST-3	MAST-3F	MAST-3F_X	MAST-3F_XX	MAST-3F_XX_sp.	Bacillariophyta (Stramenopiles)
347	0	11	0	0	0	0	0	0	0	0	0	0	0	0	0	Eukaryota	Rhizaria	Cercozoa	Filosa-Thecofilosea	Cryomonadida	Protaspa-lineage	Protaspa-lineage_X	Protaspa-lineage_X_sp.	Flagellated cells
348	0	27	0	0	0	0	0	0	0	0	0	0	0	0	0	Eukaryota	Alveolata	Dinoflagellata	Dinophyceae	Suessiales	Suessiaceae	Pelagodinium	Pelagodinium_beii	Dinoflagellata (Alveolata)
349	0	0	0	4	39	11	0	0	0	0	0	0	0	0	0	Eukaryota	Stramenopiles	Ochrophyta	Bacillariophyta	Bacillariophyta_X	Radial-centric-basal-Coscinodiscophyceae	Rhizosolenia	Rhizosolenia_fallax	Bacillariophyta (Stramenopiles)
351	0	0	0	0	0	0	0	0	20	0	0	0	0	0	0	Eukaryota	Rhizaria	Cercozoa	Filosa-Imbricatea	Thaumatomonadida	Thaumatomonadidae	Reckertia	Reckertia_filosa	Flagellated cells
353	0	0	0	0	0	0	0	28	0	0	0	0	0	0	0	Eukaryota	Stramenopiles	Opalozoa	MAST-3	MAST-3A	MAST-3A_X	MAST-3A_XX	MAST-3A_XX_sp.	Bacillariophyta (Stramenopiles)
354	0	0	0	0	0	0	26	5	0	0	0	0	0	0	0	Eukaryota	Hacrobia	Katablepharidophyta	Katablepharidaceae	Katablepharidales	Katablepharidales_X	Katablepharidales_XX	Katablepharidales_XX_sp.	Flagellated cells
355	0	0	10	2	0	6	0	0	0	0	0	0	0	0	0	Eukaryota	Rhizaria	Cercozoa	Filosa-Thecofilosea	Cryomonadida	Cryomonadida_X	Cryomonadida_XX	Cryomonadida_XX_sp.	Flagellated cells
357	0	63	0	0	8	88	0	0	0	0	0	0	0	0	0	Eukaryota	Alveolata	Ciliophora	Spirotrichea	Strombidiida	Strombidiidae_Q	Strombidiidae_Q_X	Strombidiidae_Q_X_sp.	Ciliophora (Alveolata)
358	0	0	0	0	0	0	0	3	0	0	0	0	0	5	0	Eukaryota	Alveolata	Dinoflagellata	Dinophyceae	Gymnodiniales	Gymnodiniaceae	Bispinodinium	Bispinodinium_angelaceum	Dinoflagellata (Alveolata)
359	0	0	0	0	0	0	4	0	0	0	0	0	0	0	0	Eukaryota	Rhizaria	Cercozoa	Filosa-Imbricatea	Thaumatomonadida	Thaumatomonadidae	Thaumatomastix	Thaumatomastix_sp.	Flagellated cells
360	0	0	0	0	153	1033	0	0	0	0	0	0	0	0	0	Eukaryota	Alveolata	Dinoflagellata	Dinophyceae	Dinophyceae_X	Dinophyceae_XX	Dinophyceae_XXX	Dinophyceae_XXX_sp.	Dinoflagellata (Alveolata)
361	0	0	0	0	0	0	0	0	6	0	0	0	0	0	0	Eukaryota	Archaeplastida	Chlorophyta	Mamiellophyceae	Dolichomastigales	Dolichomastigaceae	Dolichomastigaceae-B	Dolichomastigaceae-B_sp.	Flagellated cells
362	0	0	0	0	0	6	0	0	0	0	0	0	0	0	0	Eukaryota	Alveolata	Dinoflagellata	Syndiniales	Dino-Group-II	Dino-Group-II-Clade-46	Dino-Group-II-Clade-46_X	Dino-Group-II-Clade-46_X_sp.	Dinoflagellata (Alveolata)
365	0	0	0	0	0	6	0	0	0	0	0	0	0	0	0	Eukaryota	Hacrobia	Centroheliozoa	Centroheliozoa_X	Pterocystida	Pterocystida_X	Pterocystida_XX	Pterocystida_XX_sp.	Flagellated cells
366	0	0	0	0	0	0	261	135	542	0	56	0	0	0	0	Eukaryota	Archaeplastida	Chlorophyta	Mamiellophyceae	Mamiellales	Bathycoccaceae	Bathycoccus	Bathycoccus_prasinos	Flagellated cells
367	0	0	7	11	0	0	0	0	0	0	0	0	0	0	0	Eukaryota	Rhizaria	Cercozoa	Filosa-Imbricatea	Marimonadida	Marimonadida_X	Pseudopirsonia	Pseudopirsonia_mucosa	Flagellated cells
368	0	0	0	0	0	0	0	0	0	0	6	0	1	0	0	Eukaryota	Stramenopiles	Ochrophyta	Chrysophyceae	Chrysophyceae_X	Chrysophyceae_Clade-H	Chrysophyceae_Clade-H_X	Chrysophyceae_Clade-H_X_sp.	Bacillariophyta (Stramenopiles)
369	0	0	0	0	0	10	0	0	0	0	0	0	0	0	0	Eukaryota	Stramenopiles	Ochrophyta	Bacillariophyta	Bacillariophyta_X	Raphid-pennate	Cylindrotheca	Cylindrotheca_sp.	Bacillariophyta (Stramenopiles)
370	0	0	0	0	0	0	0	0	0	0	0	0	0	7	0	Eukaryota	Hacrobia	Centroheliozoa	Centroheliozoa_X	Pterocystida	Pterocystida_X	Pterocystida_XX	Pterocystida_XX_sp.	Flagellated cells
371	0	0	0	0	0	17	0	0	0	0	0	0	0	0	0	Eukaryota	Rhizaria	Cercozoa	Filosa-Imbricatea	Filosa-Imbricatea_X	Novel-clade-2	Novel-clade-2_X	Novel-clade-2_X_sp.	Flagellated cells
373	0	0	20	10	44	0	0	0	0	0	0	0	0	0	0	Eukaryota	Alveolata	Dinoflagellata	Syndiniales	Dino-Group-I	Dino-Group-I-Clade-3	Dino-Group-I-Clade-3_X	Dino-Group-I-Clade-3_X_sp.	Dinoflagellata (Alveolata)
374	63	0	0	80	7	6	0	0	0	0	0	0	0	0	0	Eukaryota	Stramenopiles	Ochrophyta	Bacillariophyta	Bacillariophyta_X	Raphid-pennate	Meuniera	Meuniera_membranacea	Bacillariophyta (Stramenopiles)
375	0	0	5	7	3	0	0	0	0	0	0	0	0	0	0	Eukaryota	Alveolata	Ciliophora	Spirotrichea	Strombidiida	Strombidiidae_L	Strombidiidae_L_X	Strombidiidae_L_X_sp.	Ciliophora (Alveolata)
378	0	0	0	0	628	131	0	0	0	0	0	0	0	0	0	Eukaryota	Alveolata	Dinoflagellata	Dinophyceae	Dinophyceae_X	Tovelliaceae	Woloszynskia	Woloszynskia_halophila	Dinoflagellata (Alveolata)
379	0	0	0	0	0	0	4	0	0	0	0	0	0	0	0	Eukaryota	Stramenopiles	Opalozoa	MAST-3	MAST-3F	MAST-3F_X	MAST-3F_XX	MAST-3F_XX_sp.	Bacillariophyta (Stramenopiles)
381	0	0	0	0	0	0	0	0	0	36	38	0	0	0	0	Eukaryota	Alveolata	Ciliophora	Spirotrichea	Tintinnida	TIN_11	Helicostomella	Helicostomella_subulata	Ciliophora (Alveolata)
382	0	0	0	26	0	128	0	0	0	0	0	0	0	0	0	Eukaryota	Alveolata	Dinoflagellata	Dinophyceae	Dinophyceae_X	Dinophyceae_XX	Dinophyceae_XXX	Dinophyceae_XXX_sp.	Dinoflagellata (Alveolata)
383	0	0	0	0	0	0	76	8	40	33	59	0	0	1836	12	Eukaryota	Alveolata	Ciliophora	Spirotrichea	Choreotrichida	Strobilidiidae_I	Pelagostrobilidium	Pelagostrobilidium_neptuni	Ciliophora (Alveolata)
385	0	0	0	0	0	0	0	6	0	0	23	0	0	0	0	Eukaryota	Alveolata	Dinoflagellata	Dinophyceae	Prorocentrales	Prorocentraceae	Prorocentrum	Prorocentrum_sp.	Dinoflagellata (Alveolata)
386	0	0	0	0	13	3	0	0	0	0	0	0	0	0	0	Eukaryota	Alveolata	Dinoflagellata	Dinophyceae	Dinophysiales	Oxyphysiaceae	Phalachroma	Phalacroma_rotundatum	Dinoflagellata (Alveolata)
387	0	0	0	0	0	4	0	0	0	0	0	0	0	0	0	Eukaryota	Hacrobia	Katablepharidophyta	Katablepharidaceae	Katablepharidales	Katablepharidales_X	Katablepharidales_XX	Katablepharidales_XX_sp.	Flagellated cells
388	0	35	44	82	253	25	0	0	0	0	0	0	0	0	0	Eukaryota	Alveolata	Dinoflagellata	Dinophyceae	Suessiales	Suessiaceae	Pelagodinium	Pelagodinium_sp.	Dinoflagellata (Alveolata)
389	0	0	0	6	0	20	0	0	0	0	0	0	0	0	0	Eukaryota	Alveolata	Ciliophora	Spirotrichea	Strombidiida	Strombidiidae	Strombidiidae_X	Strombidiidae_X_sp.	Ciliophora (Alveolata)
391	0	9	0	0	7	3	0	0	0	0	0	0	0	0	0	Eukaryota	Rhizaria	Cercozoa	Filosa-Thecofilosea	Ventricleftida	Ventrifissuridae	Ventrifissuridae_X	Ventrifissuridae_X_sp.	Flagellated cells
393	0	0	0	0	0	0	0	0	9	0	0	0	0	0	0	Eukaryota	Rhizaria	Cercozoa	Filosa-Thecofilosea	Cryomonadida	Cryothecomonas-lineage	Cryothecomonas-lineage_X	Cryothecomonas-lineage_X_sp.	Flagellated cells
394	0	0	0	0	0	0	0	9	0	0	0	0	0	0	0	Eukaryota	Rhizaria	Cercozoa	Filosa-Sarcomonadea	Cercomonadida	Cercomonadidae	Eocercomonas	Eocercomonas_echina	Flagellated cells
395	0	28	0	4	14	0	0	0	0	0	0	0	0	0	0	Eukaryota	Opisthokonta	Mesomycetozoa	Ichthyosporea	Ichthyosphonida	Ichthyosphonida_X	Ichthyosphonida_XX	Ichthyosphonida_XX_sp.	Flagellated cells
396	0	0	0	0	0	0	0	0	9	0	0	0	0	0	0	Eukaryota	Rhizaria	Cercozoa	Filosa-Thecofilosea	Filosa-Thecofilosea_X	Mataza-lineage	Mataza-lineage_X	Mataza-lineage_X_sp.	Flagellated cells
398	0	0	0	0	0	0	0	0	0	0	25	10	0	0	3	Eukaryota	Hacrobia	Centroheliozoa	Centroheliozoa_X	Centroheliozoa_XX	Centroheliozoa_XXX	Centroheliozoa_XXXX	Centroheliozoa_XXXX_sp.	Flagellated cells
399	0	0	0	7	2	0	0	0	0	0	0	0	0	0	0	Eukaryota	Rhizaria	Cercozoa	Endomyxa	Novel-clade-9	Novel-clade-9_X	Novel-clade-9_XX	Novel-clade-9_XX_sp.	Flagellated cells
400	0	0	0	0	0	0	0	93	0	0	0	0	0	0	0	Eukaryota	Alveolata	Dinoflagellata	Dinophyceae	Peridiniales	Thoracosphaeraceae	Pentapharsodinium	Pentapharsodinium_tyrrhenicum	Dinoflagellata (Alveolata)
402	0	0	0	0	0	0	7	38	15	0	7	0	0	0	0	Eukaryota	Rhizaria	Cercozoa	Filosa-Imbricatea	Marimonadida	Marimonadida_X	Pseudopirsonia	Pseudopirsonia_sp.	Flagellated cells
404	0	0	0	0	109	0	0	0	0	0	0	0	0	0	0	Eukaryota	Opisthokonta	Mesomycetozoa	Ichthyosporea	Ichthyosphonida	Pseudoperkinsidae	Pseudoperkinsidae_X	Pseudoperkinsidae_X_sp.	Flagellated cells
405	0	0	0	0	0	15	0	0	0	0	0	0	0	0	0	Eukaryota	Alveolata	Dinoflagellata	Dinophyceae	Peridiniales	Heterocapsaceae	Heterocapsa	Heterocapsa_nei/rotundata	Dinoflagellata (Alveolata)
406	0	0	0	0	0	0	0	0	0	0	0	0	3	0	0	Eukaryota	Stramenopiles	Ochrophyta	Chrysophyceae	Chrysophyceae_X	Chrysophyceae_Clade-H	Chrysophyceae_Clade-H_X	Chrysophyceae_Clade-H_X_sp.	Bacillariophyta (Stramenopiles)
407	0	0	0	0	8	0	0	0	0	0	0	0	0	0	0	Eukaryota	Alveolata	Ciliophora	Phyllopharyngea	Suctoria	Ephelotidae	Ephelota	Ephelota_mammillata	Ciliophora (Alveolata)
408	0	5	0	3	5	62	0	0	0	0	0	0	0	0	0	Eukaryota	Hacrobia	Katablepharidophyta	Katablepharidaceae	Katablepharidales	Katablepharidales_X	Katablepharis	Katablepharis_japonica	Flagellated cells
409	0	0	0	0	0	0	0	0	515	0	0	0	0	0	0	Eukaryota	Alveolata	Ciliophora	Spirotrichea	Choreotrichida	Strombidinopsidae	Strombidinopsis	Strombidinopsis_acuminata	Ciliophora (Alveolata)
410	0	0	0	0	0	0	14	103	25	4	263	22	43	0	2	Eukaryota	Alveolata	Dinoflagellata	Syndiniales	Dino-Group-II	Dino-Group-II-Clade-14	Dino-Group-II-Clade-14_X	Dino-Group-II-Clade-14_X_sp.	Dinoflagellata (Alveolata)
411	0	0	23	27	16	70	0	0	0	0	0	0	0	0	0	Eukaryota	Rhizaria	Cercozoa	Filosa-Thecofilosea	Cryomonadida	Protaspa-lineage	Protaspa-lineage_X	Protaspa-lineage_X_sp.	Flagellated cells
412	0	0	0	0	0	0	63	0	0	0	0	0	0	0	0	Eukaryota	Hacrobia	Haptophyta	Prymnesiophyceae	Prymnesiales	Chrysochromulinaceae	Chrysochromulina	Chrysochromulina_sp.	Flagellated cells
414	0	0	0	0	0	0	0	0	0	0	0	3	0	73	68	Eukaryota	Hacrobia	Katablepharidophyta	Katablepharidaceae	Katablepharidales	Katablepharidales_X	Leucocryptos	Leucocryptos_marina	Flagellated cells
416	0	0	0	0	0	0	64	0	34	28	0	0	0	0	95	Eukaryota	Stramenopiles	Ochrophyta	Bacillariophyta	Bacillariophyta_X	Polar-centric-Mediophyceae	Thalassiosira	Thalassiosira_oceanica	Bacillariophyta (Stramenopiles)
417	0	0	0	0	0	0	6	0	0	0	0	0	0	0	0	Eukaryota	Alveolata	Dinoflagellata	Dinophyceae	Peridiniales	Kryptoperidiniaceae	Unruhdinium	Unruhdinium_minima	Dinoflagellata (Alveolata)
418	0	0	0	0	0	0	19	0	0	0	0	0	0	0	0	Eukaryota	Alveolata	Dinoflagellata	Dinophyceae	Gymnodiniales	Kareniaceae	Karlodinium	Karlodinium_veneficum	Dinoflagellata (Alveolata)
419	0	0	3312	397	864	101	0	0	0	0	0	0	0	0	0	Eukaryota	Alveolata	Dinoflagellata	Syndiniales	Dino-Group-I	Dino-Group-I-Clade-4	Dino-Group-I-Clade-4_X	Dino-Group-I-Clade-4_X_sp.	Dinoflagellata (Alveolata)
421	0	0	0	0	0	0	0	0	0	0	0	0	8	0	0	Eukaryota	Rhizaria	Cercozoa	Filosa-Imbricatea	Thaumatomonadida	Thaumatomonadidae	Thaumatomastix	Thaumatomastix_sp.	Flagellated cells
422	0	0	0	0	7	0	0	0	0	0	0	0	0	0	0	Eukaryota	Rhizaria	Cercozoa	Filosa-Thecofilosea	Ebriida	Botuliformidae	Botuliformidae_X	Botuliformidae_X_sp.	Flagellated cells
423	0	0	0	0	20	12	0	0	0	0	0	0	0	0	0	Eukaryota	Rhizaria	Cercozoa	Filosa-Thecofilosea	Cryomonadida	Protaspa-lineage	Protaspa-lineage_X	Protaspa-lineage_X_sp.	Flagellated cells
425	0	0	0	6	0	0	0	0	0	0	0	0	0	0	0	Eukaryota	Rhizaria	Cercozoa	Filosa-Thecofilosea	Cryomonadida	Cryothecomonas-lineage	Cryothecomonas	Cryothecomonas_sp.	Flagellated cells
426	0	0	0	0	0	0	0	0	482	0	24	0	0	0	0	Eukaryota	Rhizaria	Cercozoa	Filosa-Thecofilosea	Cryomonadida	Protaspa-lineage	Protaspa-lineage_X	Protaspa-lineage_X_sp.	Flagellated cells
427	2	5	0	0	0	0	0	0	0	0	0	0	0	0	0	Eukaryota	Alveolata	Dinoflagellata	Syndiniales	Dino-Group-II	Dino-Group-II-Clade-1	Dino-Group-II-Clade-1_X	Dino-Group-II-Clade-1_X_sp.	Dinoflagellata (Alveolata)
428	0	0	0	0	0	10	0	0	0	0	0	0	0	0	0	Eukaryota	Rhizaria	Cercozoa	Filosa-Thecofilosea	Cryomonadida	Cryothecomonas-lineage	Cryothecomonas	Cryothecomonas_aestivalis	Flagellated cells
429	0	0	0	0	0	0	11	0	0	0	8	0	0	94	0	Eukaryota	Stramenopiles	Ochrophyta	Bacillariophyta	Bacillariophyta_X	Polar-centric-Mediophyceae	Chaetoceros	Chaetoceros_danicus	Bacillariophyta (Stramenopiles)
430	0	0	16	0	0	0	0	0	0	0	0	0	0	0	0	Eukaryota	Stramenopiles	Ochrophyta	Bacillariophyta	Bacillariophyta_X	Raphid-pennate	Navicula	Navicula_sp.	Bacillariophyta (Stramenopiles)
431	0	0	7	1969	6	0	0	0	0	0	0	0	0	0	0	Eukaryota	Alveolata	Dinoflagellata	Syndiniales	Dino-Group-I	Dino-Group-I-Clade-1	Dino-Group-I-Clade-1_X	Dino-Group-I-Clade-1_X_sp.	Dinoflagellata (Alveolata)
432	0	2	0	13	0	24	0	0	0	0	0	0	0	0	0	Eukaryota	Archaeplastida	Chlorophyta	Mamiellophyceae	Mamiellales	Bathycoccaceae	Bathycoccus	Bathycoccus_prasinos	Flagellated cells
433	0	0	0	0	0	0	0	0	0	7	0	25	6	0	2	Eukaryota	Archaeplastida	Chlorophyta	Trebouxiophyceae	Microthamniales	Microthamniales_X	Trebouxia	Trebouxia_sp.	Flagellated cells
434	0	0	0	11	0	0	0	0	0	0	0	0	0	0	0	Eukaryota	Alveolata	Dinoflagellata	Noctilucophyceae	Noctilucales	Noctilucaceae	Spatulodinium	Spatulodinium_pseudonoctiluca	Dinoflagellata (Alveolata)
436	0	0	0	0	0	0	0	0	0	0	0	0	7	0	0	Eukaryota	Alveolata	Dinoflagellata	Syndiniales	Dino-Group-II	Dino-Group-II-Clade-1	Dino-Group-II-Clade-1_X	Dino-Group-II-Clade-1_X_sp.	Dinoflagellata (Alveolata)
437	0	0	0	0	0	0	0	0	0	0	5	0	0	0	0	Eukaryota	Stramenopiles	Ochrophyta	Chrysophyceae	Chrysophyceae_X	Chrysophyceae_Clade-H	Chrysophyceae_Clade-H_X	Chrysophyceae_Clade-H_X_sp.	Bacillariophyta (Stramenopiles)
438	0	0	0	0	0	0	0	43	46	0	15	0	0	0	0	Eukaryota	Stramenopiles	Ochrophyta	Bacillariophyta	Bacillariophyta_X	Raphid-pennate	Nitzschia	Nitzschia_pusilla	Bacillariophyta (Stramenopiles)
439	0	0	0	0	0	0	7	0	0	0	0	0	0	0	0	Eukaryota	Rhizaria	Radiolaria	Acantharea	Acantharea_X	Acantharea_XX	Acantharea_XXX	Acantharea_XXX_sp.	Flagellated cells
440	0	0	0	0	0	0	0	0	0	0	5	0	0	0	0	Eukaryota	Rhizaria	Cercozoa	Filosa-Imbricatea	Thaumatomonadida	Thaumatomonadidae	Reckertia	Reckertia_filosa	Flagellated cells
441	0	0	0	0	6	10	0	0	0	0	0	0	0	0	0	Eukaryota	Alveolata	Dinoflagellata	Syndiniales	Dino-Group-II	Dino-Group-II-Clade-47	Dino-Group-II-Clade-47_X	Dino-Group-II-Clade-47_X_sp.	Dinoflagellata (Alveolata)
442	0	0	0	0	0	0	0	5	0	0	31	0	0	0	4	Eukaryota	Alveolata	Ciliophora	CONThreeP	CONThreeP_X	CONThreeP_XX	Askenasia	Askenasia_sp.	Ciliophora (Alveolata)
443	0	60	0	0	0	0	0	0	0	0	0	0	0	0	0	Eukaryota	Alveolata	Dinoflagellata	Dinophyceae	Gymnodiniales	Gymnodiniaceae	Gymnodinium	Gymnodinium_microreticulatum	Dinoflagellata (Alveolata)
444	0	0	0	0	0	0	26	0	0	0	0	0	0	0	0	Eukaryota	Rhizaria	Cercozoa	Filosa-Thecofilosea	Cryomonadida	Cryothecomonas-lineage	Cryothecomonas	Cryothecomonas_aestivalis	Flagellated cells
445	0	0	0	0	0	0	10	8	16	0	0	0	0	0	0	Eukaryota	Alveolata	Ciliophora	CONThreeP	CONThreeP_X	Urotrichidae	Urotricha	Urotricha_sp.	Ciliophora (Alveolata)
446	0	0	0	0	0	0	0	0	0	0	23	0	0	0	0	Eukaryota	Alveolata	Ciliophora	CONThreeP	CONThreeP_X	Urotrichidae	Urotricha	Urotricha_sp.	Ciliophora (Alveolata)
447	0	0	0	0	0	0	6	0	0	0	0	0	0	0	0	Eukaryota	Stramenopiles	Ochrophyta	Chrysophyceae	Chrysophyceae_X	Chrysophyceae_Clade-H	Chrysophyceae_Clade-H_X	Chrysophyceae_Clade-H_X_sp.	Bacillariophyta (Stramenopiles)
448	0	0	0	0	836	0	0	0	0	0	0	0	0	0	0	Eukaryota	Stramenopiles	Opalozoa	MAST-3	MAST-3I	MAST-3I_X	MAST-3I_XX	MAST-3I_XX_sp.	Bacillariophyta (Stramenopiles)
449	0	0	0	0	0	0	20	6	4	0	0	0	0	5	0	Eukaryota	Stramenopiles	Ochrophyta	Bacillariophyta	Bacillariophyta_X	Raphid-pennate	Pleurosigma	Pleurosigma_intermedium	Bacillariophyta (Stramenopiles)
451	6	0	0	0	0	0	0	0	0	0	0	0	0	0	0	Eukaryota	Alveolata	Dinoflagellata	Dinophyceae	Gymnodiniales	Gymnodiniaceae	Gyrodinium	Gyrodinium_fusiforme	Dinoflagellata (Alveolata)
452	0	0	0	0	0	0	0	13	0	0	0	0	0	0	0	Eukaryota	Hacrobia	Katablepharidophyta	Katablepharidaceae	Katablepharidales	Katablepharidales_X	Roombia	Roombia_truncata	Flagellated cells
453	0	0	0	0	0	0	6	0	4	0	0	0	0	0	0	Eukaryota	Alveolata	Ciliophora	CONThreeP	CONThreeP_X	Urotrichidae	Urotricha	Urotricha_sp.	Ciliophora (Alveolata)
455	0	0	0	0	30	0	0	0	0	0	0	0	0	0	0	Eukaryota	Alveolata	Dinoflagellata	Dinophyceae	Dinophyceae_X	Dinophyceae_XX	Dinophyceae_XXX	Dinophyceae_XXX_sp.	Dinoflagellata (Alveolata)
456	0	0	0	0	0	0	0	12	25	8	30	4412	1742	141	55	Eukaryota	Alveolata	Ciliophora	Phyllopharyngea	Suctoria	Suctoria_X	Suctoria_XX	Suctoria_XX_sp.	Ciliophora (Alveolata)
457	0	0	0	0	25	176	0	0	0	0	0	0	0	0	0	Eukaryota	Alveolata	Dinoflagellata	Dinophyceae	Gymnodiniales	Warnowiaceae	Warnowia	Warnowia_sp.	Dinoflagellata (Alveolata)
458	0	0	0	0	0	0	14	49	0	0	34	29	0	19	0	Eukaryota	Rhizaria	Cercozoa	Filosa-Thecofilosea	Cryomonadida	Protaspa-lineage	Protaspa-lineage_X	Protaspa-lineage_X_sp.	Flagellated cells
459	0	0	0	0	0	0	3	0	0	3	4	0	0	0	0	Eukaryota	Alveolata	Dinoflagellata	Syndiniales	Dino-Group-II	Dino-Group-II-Clade-47	Dino-Group-II-Clade-47_X	Dino-Group-II-Clade-47_X_sp.	Dinoflagellata (Alveolata)
460	0	0	0	0	0	0	32	10	0	0	0	0	0	0	0	Eukaryota	Alveolata	Dinoflagellata	Syndiniales	Dino-Group-II	Dino-Group-II-Clade-22	Dino-Group-II-Clade-22_X	Dino-Group-II-Clade-22_X_sp.	Dinoflagellata (Alveolata)
463	0	63	0	0	0	0	0	0	0	0	0	0	0	0	0	Eukaryota	Alveolata	Dinoflagellata	Dinophyceae	Peridiniales	Peridiniaceae	Peridinium	Peridinium_sociale	Dinoflagellata (Alveolata)
464	0	0	0	0	0	0	0	0	0	0	2	0	0	4	0	Eukaryota	Rhizaria	Cercozoa	Filosa-Thecofilosea	Ebriida	Botuliformidae	Botuliforma	Botuliforma_benthica	Flagellated cells
465	0	0	0	8	0	0	0	0	0	0	0	0	0	0	0	Eukaryota	Alveolata	Perkinsea	Perkinsida	Perkinsida_X	Perkinsida_XX	Perkinsus	Perkinsus_qugwadi	Flagellated cells
467	0	0	0	0	0	0	4	0	10	0	0	0	0	0	0	Eukaryota	Amoebozoa	Lobosa	Lobosa_X	Himatismenida	Parvamoebidae	Parvamoeba	Parvamoeba_sp.	Flagellated cells
468	0	0	0	0	0	0	0	17	59	0	0	0	0	0	0	Eukaryota	Rhizaria	Cercozoa	Filosa-Imbricatea	Marimonadida	Marimonadida_X	Auranticordis	Auranticordis_quadriverberis	Flagellated cells
469	0	0	0	0	0	6	0	0	0	0	0	0	0	0	0	Eukaryota	Alveolata	Ciliophora	Spirotrichea	Choreotrichida	Strombidinopsidae	Strombidinopsis	Strombidinopsis_batos	Ciliophora (Alveolata)
470	0	0	0	0	0	0	0	0	0	0	0	0	0	19	0	Eukaryota	Alveolata	Ciliophora	Oligohymenophorea	Scuticociliatia_1	Philasterida	Philasterida_X	Philasterida_X_sp.	Ciliophora (Alveolata)
471	0	0	0	0	0	0	0	0	54	0	32	0	0	13	0	Eukaryota	Alveolata	Dinoflagellata	Syndiniales	Dino-Group-I	Dino-Group-I-Clade-4	Dino-Group-I-Clade-4_X	Dino-Group-I-Clade-4_X_sp.	Dinoflagellata (Alveolata)
472	0	0	0	0	0	0	0	0	0	0	0	0	3	3	0	Eukaryota	Rhizaria	Cercozoa	Filosa-Imbricatea	Euglyphida	Euglyphida_X	Euglyphida_XX	Euglyphida_XX_sp.	Flagellated cells
473	0	0	0	0	0	0	0	0	0	19	0	0	0	0	0	Eukaryota	Alveolata	Dinoflagellata	Dinophyceae	Suessiales	Suessiaceae	Pelagodinium	Pelagodinium_sp.	Dinoflagellata (Alveolata)
474	0	0	0	0	4	9	0	0	0	0	0	0	0	0	0	Eukaryota	Stramenopiles	Ochrophyta	Bacillariophyta	Bacillariophyta_X	Polar-centric-Mediophyceae	Chaetoceros	Chaetoceros_protuberans	Bacillariophyta (Stramenopiles)
477	0	0	0	0	0	5	0	0	0	0	0	0	0	0	0	Eukaryota	Stramenopiles	Ochrophyta	Bacillariophyta	Bacillariophyta_X	Radial-centric-basal-Coscinodiscophyceae	Actinocyclus	Actinocyclus_sp.	Bacillariophyta (Stramenopiles)
478	3380	7379	6415	4651	5069	878	0	0	0	0	0	0	0	0	0	Eukaryota	Alveolata	Dinoflagellata	Dinophyceae	Gymnodiniales	Gymnodiniaceae	Gyrodinium	Gyrodinium_fusiforme	Dinoflagellata (Alveolata)
479	0	0	0	5	0	0	0	0	0	0	0	0	0	0	0	Eukaryota	Rhizaria	Cercozoa	Endomyxa	Novel-clade-9	Novel-clade-9_X	Novel-clade-9_XX	Novel-clade-9_XX_sp.	Flagellated cells
480	0	38	0	33	11	43	0	0	0	0	0	0	0	0	0	Eukaryota	Rhizaria	Cercozoa	Filosa-Thecofilosea	Cryomonadida	Protaspa-lineage	Protaspa-lineage_X	Protaspa-lineage_X_sp.	Flagellated cells
481	0	0	0	0	0	0	10	0	0	0	0	0	0	0	0	Eukaryota	Stramenopiles	Opalozoa	MAST-3	MAST-3A	MAST-3A_X	MAST-3A_XX	MAST-3A_XX_sp.	Bacillariophyta (Stramenopiles)
482	0	0	0	0	0	0	33	0	3	0	0	0	0	0	0	Eukaryota	Alveolata	Dinoflagellata	Syndiniales	Dino-Group-II	Dino-Group-II-Clade-6	Dino-Group-II-Clade-6_X	Dino-Group-II-Clade-6_X_sp.	Dinoflagellata (Alveolata)
483	0	0	0	0	0	0	0	8	0	0	0	0	0	0	0	Eukaryota	Alveolata	Dinoflagellata	Syndiniales	Dino-Group-II	Dino-Group-II-Clade-14	Dino-Group-II-Clade-14_X	Dino-Group-II-Clade-14_X_sp.	Dinoflagellata (Alveolata)
484	0	0	0	0	0	0	0	0	0	0	0	0	0	28	0	Eukaryota	Rhizaria	Cercozoa	Filosa-Thecofilosea	Cryomonadida	Protaspa-lineage	Protaspa-lineage_X	Protaspa-lineage_X_sp.	Flagellated cells
485	0	0	0	0	0	0	0	0	0	13	0	0	0	0	0	Eukaryota	Alveolata	Ciliophora	CONThreeP	CONThreeP_X	Urotrichidae	Urotricha	Urotricha_sp.	Ciliophora (Alveolata)
486	0	0	0	3	0	16	0	0	0	0	0	0	0	0	0	Eukaryota	Stramenopiles	Ochrophyta	Bolidophyceae	Parmales	Parmales_X	Parmales_XX	Parmales_XX_sp.	Bacillariophyta (Stramenopiles)
487	0	0	0	0	0	0	0	259	198	0	59	0	0	0	0	Eukaryota	Alveolata	Ciliophora	Spirotrichea	Strombidiida	Strombidiidae	Spirostrombidium	Spirostrombidium_agathae	Ciliophora (Alveolata)
488	0	0	0	0	0	0	0	0	0	8	0	0	0	0	0	Eukaryota	Alveolata	Ciliophora	CONThreeP	CONThreeP_X	Urotrichidae	Urotricha	Urotricha_sp.	Ciliophora (Alveolata)
489	0	0	0	0	0	0	0	79	75	38	12	18	0	0	0	Eukaryota	Rhizaria	Cercozoa	Filosa-Thecofilosea	Filosa-Thecofilosea_X	Mataza-lineage	Mataza-lineage_X	Mataza-lineage_X_sp.	Flagellated cells
490	0	0	0	0	0	0	0	0	0	0	0	0	2	0	0	Eukaryota	Rhizaria	Cercozoa	Filosa-Thecofilosea	Ebriida	Botuliformidae	Botuliforma	Botuliforma_benthica	Flagellated cells
491	0	0	0	0	0	0	0	0	0	21	0	0	0	0	0	Eukaryota	Hacrobia	Haptophyta	Prymnesiophyceae	Prymnesiales	Chrysochromulinaceae	Chrysochromulina	Chrysochromulina_sp.	Flagellated cells
492	0	0	0	0	0	0	0	13	0	8	163	116	16	202	0	Eukaryota	Alveolata	Ciliophora	Spirotrichea	Strombidiida	Strombidiidae	Strombidium	Strombidium_sp.	Ciliophora (Alveolata)
493	0	0	66	0	1	6	0	0	0	0	0	0	0	0	0	Eukaryota	Alveolata	Dinoflagellata	Dinophyceae	Peridiniales	Protoperidiniaceae	Protoperidinium	Protoperidinium_bipes	Dinoflagellata (Alveolata)
495	0	0	0	0	0	0	120	10	12	14	0	0	0	0	0	Eukaryota	Alveolata	Dinoflagellata	Dinophyceae	Dinophyceae_X	Dinophyceae_XX	Dinophyceae_XXX	Dinophyceae_XXX_sp.	Dinoflagellata (Alveolata)
496	0	0	0	0	0	0	160	388	0	12	0	5	0	79	0	Eukaryota	Stramenopiles	Ochrophyta	Bacillariophyta	Bacillariophyta_X	Araphid-pennate	Delphineis	Delphineis_sp.	Bacillariophyta (Stramenopiles)
498	0	0	0	0	0	0	0	0	0	0	0	0	6	0	0	Eukaryota	Rhizaria	Cercozoa	Filosa-Thecofilosea	Ebriida	Botuliformidae	Botuliforma	Botuliforma_benthica	Flagellated cells
501	0	0	0	0	0	0	504	68	0	2887	862	2524	81	152	1594	Eukaryota	Alveolata	Dinoflagellata	Dinophyceae	Gymnodiniales	Gymnodiniaceae	Gyrodinium	Gyrodinium_fusiforme	Dinoflagellata (Alveolata)
502	0	0	0	0	0	0	0	0	0	0	0	12	0	0	0	Eukaryota	Alveolata	Dinoflagellata	Dinophyceae	Gymnodiniales	Gymnodiniaceae	Gyrodinium	Gyrodinium_fusiforme	Dinoflagellata (Alveolata)
503	0	0	0	0	0	7	0	0	0	0	0	0	0	0	0	Eukaryota	Stramenopiles	Ochrophyta	Chrysophyceae	Chrysophyceae_X	Chrysophyceae_Clade-H	Chrysophyceae_Clade-H_X	Chrysophyceae_Clade-H_X_sp.	Bacillariophyta (Stramenopiles)
504	0	0	0	0	0	0	48	565	186	0	63	0	0	337	0	Eukaryota	Hacrobia	Picozoa	Picozoa_X	Picozoa_XX	Picozoa_XXX	Picomonas	Picomonas_judraskeda	Flagellated cells
505	0	0	0	0	0	0	0	19	0	22	0	0	0	0	0	Eukaryota	Rhizaria	Cercozoa	Filosa-Imbricatea	Marimonadida	Marimonadida_X	Pseudopirsonia	Pseudopirsonia_sp.	Flagellated cells
506	0	0	0	0	0	0	0	0	0	0	0	0	4	0	0	Eukaryota	Rhizaria	Cercozoa	Filosa-Sarcomonadea	Cercomonadida	Cercomonadidae	Eocercomonas	Eocercomonas_echina	Flagellated cells
507	0	0	0	0	0	0	0	0	0	0	0	0	8	0	0	Eukaryota	Rhizaria	Cercozoa	Filosa-Thecofilosea	Cryomonadida	Protaspa-lineage	Protaspa-lineage_X	Protaspa-lineage_X_sp.	Flagellated cells
508	0	0	0	0	0	0	3	0	0	0	16	0	0	0	0	Eukaryota	Rhizaria	Cercozoa	Filosa-Thecofilosea	Filosa-Thecofilosea_X	Mataza-lineage	Mataza	Mataza_hastifera	Flagellated cells
509	0	0	0	3	0	27	0	0	0	0	0	0	0	0	0	Eukaryota	Archaeplastida	Rhodophyta	Stylonematophyceae	Porphyridiales-2	Stylonematales-Group-I	Rhodospora	Rhodospora_sordida	Flagellated cells
510	0	0	0	0	0	0	0	0	0	0	0	16	0	0	0	Eukaryota	Alveolata	Dinoflagellata	Dinophyceae	Dinophyceae_X	Dinophyceae_XX	Dinophyceae_XXX	Dinophyceae_XXX_sp.	Dinoflagellata (Alveolata)
511	0	100	9	16	9	0	0	0	0	0	0	0	0	0	0	Eukaryota	Rhizaria	Cercozoa	Filosa-Thecofilosea	Ventricleftida	Ventrifissuridae	Ventrifissura	Ventrifissura_foliiformis	Flagellated cells
512	0	0	0	0	0	0	0	0	0	0	13	0	0	0	0	Eukaryota	Alveolata	Dinoflagellata	Dinophyceae	Gymnodiniales	Warnowiaceae	Warnowia	Warnowia_sp.	Dinoflagellata (Alveolata)
513	0	0	0	0	0	0	0	2	8	0	0	0	0	0	0	Eukaryota	Alveolata	Ciliophora	Spirotrichea	Strombidiida_G	Strombidiida_G_X	Strombidiida_G_XX	Strombidiida_G_XX_sp.	Ciliophora (Alveolata)
514	0	0	0	0	0	0	179	30	182	0	36	0	0	0	0	Eukaryota	Archaeplastida	Chlorophyta	Mamiellophyceae	Mamiellales	Bathycoccaceae	Ostreococcus	Ostreococcus_lucimarinus	Flagellated cells
515	4	0	0	0	0	0	0	0	0	0	0	0	0	0	0	Eukaryota	Alveolata	Dinoflagellata	Dinophyceae	Dinophyceae_X	Dinophyceae_XX	Dinophyceae_XXX	Dinophyceae_XXX_sp.	Dinoflagellata (Alveolata)
516	0	7	0	0	0	0	0	0	0	0	0	0	0	0	0	Eukaryota	Alveolata	Dinoflagellata	Dinophyceae	Gymnodiniales	Gymnodiniaceae	Gyrodinium	Gyrodinium_fusiforme	Dinoflagellata (Alveolata)
517	0	0	0	0	0	0	31	33	0	0	0	0	0	0	0	Eukaryota	Alveolata	Dinoflagellata	Dinophyceae	Gymnodiniales	Kareniaceae	Karlodinium	Karlodinium_veneficum	Dinoflagellata (Alveolata)
518	0	0	0	4	0	0	0	0	0	0	0	0	0	0	0	Eukaryota	Stramenopiles	Ochrophyta	Chrysophyceae	Chrysophyceae_X	Chrysophyceae_Clade-H	Chrysophyceae_Clade-H_X	Chrysophyceae_Clade-H_X_sp.	Bacillariophyta (Stramenopiles)
519	0	0	6	0	0	3	0	0	0	0	0	0	0	0	0	Eukaryota	Stramenopiles	Ochrophyta	Bacillariophyta	Bacillariophyta_X	Polar-centric-Mediophyceae	Chaetoceros	Chaetoceros_elegans	Bacillariophyta (Stramenopiles)
520	0	0	0	33	13	263	0	0	0	0	0	0	0	0	0	Eukaryota	Hacrobia	Picozoa	Picozoa_X	Picozoa_XX	Picozoa_XXX	Picomonas	Picomonas_judraskeda	Flagellated cells
522	0	0	0	0	0	4	0	0	0	0	0	0	0	0	0	Eukaryota	Stramenopiles	Ochrophyta	Chrysophyceae	Chrysophyceae_X	Chrysophyceae_Clade-H	Chrysophyceae_Clade-H_X	Chrysophyceae_Clade-H_X_sp.	Bacillariophyta (Stramenopiles)
523	0	0	0	0	0	0	17	0	0	0	0	0	0	0	0	Eukaryota	Rhizaria	Cercozoa	Filosa-Thecofilosea	Cryomonadida	Protaspa-lineage	Protaspa	Protaspa_grandis	Flagellated cells
525	0	0	0	0	0	0	5	54	17	0	13	0	0	0	0	Eukaryota	Stramenopiles	Ochrophyta	Chrysophyceae	Chrysophyceae_X	Chrysophyceae_Clade-I	Chrysophyceae_Clade-I_X	Chrysophyceae_Clade-I_X_sp.	Bacillariophyta (Stramenopiles)
526	0	13	0	0	0	0	0	0	0	0	0	0	0	0	0	Eukaryota	Alveolata	Ciliophora	Spirotrichea	Strombidiida	Strombidiidae_H	Strombidiidae_H_X	Strombidiidae_H_X_sp.	Ciliophora (Alveolata)
527	0	0	0	0	0	0	36	0	0	0	0	0	0	0	0	Eukaryota	Alveolata	Dinoflagellata	Syndiniales	Dino-Group-II	Dino-Group-II-Clade-8	Dino-Group-II-Clade-8_X	Dino-Group-II-Clade-8_X_sp.	Dinoflagellata (Alveolata)
528	0	0	0	0	0	0	24	71	60	0	0	0	0	0	0	Eukaryota	Alveolata	Dinoflagellata	Dinophyceae	Dinophyceae_X	Dinophyceae_XX	Dinophyceae_XXX	Dinophyceae_XXX_sp.	Dinoflagellata (Alveolata)
530	0	0	0	0	5	0	0	0	0	0	0	0	0	0	0	Eukaryota	Stramenopiles	Opalozoa	MAST-3	MAST-3E	MAST-3E_X	MAST-3E_XX	MAST-3E_XX_sp.	Bacillariophyta (Stramenopiles)
531	0	0	0	23	0	18	0	0	0	0	0	0	0	0	0	Eukaryota	Stramenopiles	Opalozoa	MAST-3	MAST-3A	MAST-3A_X	MAST-3A_XX	MAST-3A_XX_sp.	Bacillariophyta (Stramenopiles)
532	0	0	0	0	0	0	0	49	0	0	0	0	0	8	0	Eukaryota	Stramenopiles	Ochrophyta	Bacillariophyta	Bacillariophyta_X	Radial-centric-basal-Coscinodiscophyceae	Paralia	Paralia_sulcata	Bacillariophyta (Stramenopiles)
533	0	0	0	0	0	0	1	0	0	9	0	7	6	0	2	Eukaryota	Hacrobia	Picozoa	Picozoa_X	Picozoa_XX	Picozoa_XXX	Picomonas	Picomonas_judraskeda	Flagellated cells
535	0	0	0	0	0	0	0	0	0	145	16	0	0	0	0	Eukaryota	Rhizaria	Cercozoa	Filosa-Thecofilosea	Cryomonadida	Protaspa-lineage	Protaspa-lineage_X	Protaspa-lineage_X_sp.	Flagellated cells
536	0	0	0	0	0	0	0	0	0	26	0	0	0	25	0	Eukaryota	Alveolata	Ciliophora	Cyclotrichium_like_organism	Cyclotrichium_like_organism_X	Cyclotrichium_like_organism_XX	Cyclotrichium	Cyclotrichium_cyclokaryon	Ciliophora (Alveolata)
537	0	0	0	0	2	12	0	0	0	0	0	0	0	0	0	Eukaryota	Stramenopiles	Ochrophyta	Bacillariophyta	Bacillariophyta_X	Polar-centric-Mediophyceae	Ditylum	Ditylum_brightwellii	Bacillariophyta (Stramenopiles)
538	1902	0	0	0	0	5	0	0	0	0	0	0	0	0	0	Eukaryota	Alveolata	Ciliophora	Phyllopharyngea	Suctoria	Suctoria_X	Suctoria_XX	Suctoria_XX_sp.	Ciliophora (Alveolata)
539	0	0	0	0	0	24	0	0	0	0	0	0	0	0	0	Eukaryota	Alveolata	Dinoflagellata	Syndiniales	Dino-Group-III	Dino-Group-III_X	Dino-Group-III_XX	Dino-Group-III_XX_sp.	Dinoflagellata (Alveolata)
540	0	0	0	0	0	0	0	20	0	0	0	0	0	0	0	Eukaryota	Alveolata	Dinoflagellata	Dinophyceae	Peridiniales	Amphidiniopsidaceae	Archaeperidinium	Archaeperidinium_saanichi	Dinoflagellata (Alveolata)
541	0	0	0	0	0	0	0	7	0	0	0	0	0	0	0	Eukaryota	Alveolata	Ciliophora	Cyclotrichium_like_organism	Cyclotrichium_like_organism_X	Cyclotrichium_like_organism_XX	Cyclotrichium	Cyclotrichium_cyclokaryon	Ciliophora (Alveolata)
542	0	0	0	0	0	0	15	7	28	2	23	0	0	0	0	Eukaryota	Stramenopiles	Ochrophyta	Chrysophyceae	Chrysophyceae_X	Chrysophyceae_Clade-I	Chrysophyceae_Clade-I_X	Chrysophyceae_Clade-I_X_sp.	Bacillariophyta (Stramenopiles)
543	0	0	0	0	0	0	0	14	0	0	0	0	0	0	0	Eukaryota	Rhizaria	Cercozoa	Filosa-Imbricatea	Filosa-Imbricatea_X	Novel-clade-2	Novel-clade-2_X	Novel-clade-2_X_sp.	Flagellated cells
544	0	66	19	60	55	510	0	0	0	0	0	0	0	0	0	Eukaryota	Hacrobia	Cryptophyta	Cryptophyceae	Cryptomonadales	Cryptomonadales_X	Plagioselmis	Plagioselmis_prolonga	Flagellated cells
546	0	0	0	0	8	0	0	0	0	0	0	0	0	0	0	Eukaryota	Rhizaria	Cercozoa	Endomyxa	Vampyrellida	op14-lineage	op14-lineage_X	op14-lineage_X_sp.	Flagellated cells
548	0	0	0	0	0	0	17	6	51	6	0	0	0	0	0	Eukaryota	Stramenopiles	Ochrophyta	Bacillariophyta	Bacillariophyta_X	Polar-centric-Mediophyceae	Chaetoceros	Chaetoceros_danicus	Bacillariophyta (Stramenopiles)
549	0	0	0	0	0	0	34	0	0	107	0	7	25	292	88	Eukaryota	Hacrobia	Picozoa	Picozoa_X	Picozoa_XX	Picozoa_XXX	Picozoa_XXXX	Picozoa_XXXX_sp.	Flagellated cells
550	0	0	0	0	0	0	0	0	0	0	0	0	34	0	2	Eukaryota	Rhizaria	Cercozoa	Filosa-Thecofilosea	Ventricleftida	Verrucomonadidae	Verrucomonas	Verrucomonas_bifida	Flagellated cells
551	0	0	0	0	0	0	0	43	0	0	0	6	0	0	0	Eukaryota	Stramenopiles	Ochrophyta	Chrysophyceae	Chrysophyceae_X	Chrysophyceae_Clade-I	Chrysophyceae_Clade-I_X	Chrysophyceae_Clade-I_X_sp.	Bacillariophyta (Stramenopiles)
552	0	0	0	2	15	5	0	0	0	0	0	0	0	0	0	Eukaryota	Rhizaria	Cercozoa	Filosa-Imbricatea	Marimonadida	Marimonadida_X	Pseudopirsonia	Pseudopirsonia_sp.	Flagellated cells
553	0	0	0	0	0	0	0	0	0	0	0	0	4	17	0	Eukaryota	Rhizaria	Cercozoa	Filosa-Thecofilosea	Cryomonadida	Protaspa-lineage	Protaspa-lineage_X	Protaspa-lineage_X_sp.	Flagellated cells
555	0	0	0	0	0	0	38	0	0	0	0	0	0	0	0	Eukaryota	Alveolata	Ciliophora	Spirotrichea	Strombidiida	Strombidiidae_B	Strombidiidae_B_X	Strombidiidae_B_X_sp.	Ciliophora (Alveolata)
556	0	0	0	0	11	0	0	0	0	0	0	0	0	0	0	Eukaryota	Rhizaria	Cercozoa	Filosa-Thecofilosea	Ebriida	TAGIRI1-lineage	TAGIRI1-lineage_X	TAGIRI1-lineage_X_sp.	Flagellated cells
557	0	0	201	253	972	651	0	0	0	0	0	0	0	0	0	Eukaryota	Alveolata	Dinoflagellata	Dinophyceae	Gymnodiniales	Gymnodiniaceae	Gyrodinium	Gyrodinium_fusiforme	Dinoflagellata (Alveolata)
559	0	0	0	0	0	0	0	42	0	0	0	0	0	0	0	Eukaryota	Stramenopiles	Ochrophyta	Chrysophyceae	Chrysophyceae_X	Chrysophyceae_Clade_B2	Oikomonas	Oikomonas_sp.	Bacillariophyta (Stramenopiles)
560	0	0	0	0	0	0	0	0	0	0	20	0	0	0	0	Eukaryota	Stramenopiles	Ochrophyta	Chrysophyceae	Chrysophyceae_X	Chrysophyceae_Clade-I	Chrysophyceae_Clade-I_X	Chrysophyceae_Clade-I_X_sp.	Bacillariophyta (Stramenopiles)
561	56	8	14	0	0	43	0	0	0	0	0	0	0	0	0	Eukaryota	Alveolata	Ciliophora	Spirotrichea	Strombidiida	Strombidiidae_B	Strombidiidae_B_X	Strombidiidae_B_X_sp.	Ciliophora (Alveolata)
562	0	0	0	0	6	0	0	0	0	0	0	0	0	0	0	Eukaryota	Rhizaria	Cercozoa	Filosa-Thecofilosea	Cryomonadida	Protaspa-lineage	Protaspa	Protaspa_grandis	Flagellated cells
563	0	0	52	0	0	0	0	0	0	0	0	0	0	0	0	Eukaryota	Rhizaria	Cercozoa	Filosa-Thecofilosea	Cryomonadida	Protaspa-lineage	Protaspa-lineage_X	Protaspa-lineage_X_sp.	Flagellated cells
564	0	7	0	0	0	0	0	0	0	0	0	0	0	0	0	Eukaryota	Alveolata	Ciliophora	Litostomatea	Haptoria_4	Didiniidae	Didiniidae_X	Didiniidae_X_sp.	Ciliophora (Alveolata)
565	32	0	0	0	0	0	0	0	0	0	0	0	0	0	0	Eukaryota	Alveolata	Dinoflagellata	Syndiniales	Dino-Group-I	Dino-Group-I-Clade-4	Dino-Group-I-Clade-4_X	Dino-Group-I-Clade-4_X_sp.	Dinoflagellata (Alveolata)
566	0	0	1843	937	131	37	0	0	0	0	0	0	0	0	0	Eukaryota	Alveolata	Dinoflagellata	Syndiniales	Dino-Group-I	Dino-Group-I-Clade-4	Dino-Group-I-Clade-4_X	Dino-Group-I-Clade-4_X_sp.	Dinoflagellata (Alveolata)
567	0	11	12	25	0	104	0	0	0	0	0	0	0	0	0	Eukaryota	Alveolata	Dinoflagellata	Dinophyceae	Gymnodiniales	Gymnodiniaceae	Polykrikos	Polykrikos_kofoidii	Dinoflagellata (Alveolata)
568	0	0	0	0	0	0	0	30	10	0	22	0	0	0	0	Eukaryota	Alveolata	Ciliophora	Spirotrichea	Strombidiida	Strombidiidae_Q	Strombidiidae_Q_X	Strombidiidae_Q_X_sp.	Ciliophora (Alveolata)
569	0	0	0	0	0	0	0	0	0	0	0	0	0	10	0	Eukaryota	Hacrobia	Haptophyta	Prymnesiophyceae	Prymnesiales	Chrysochromulinaceae	Chrysochromulina	Chrysochromulina_sp.	Flagellated cells
570	0	0	0	0	0	0	0	0	0	0	0	0	0	0	12	Eukaryota	Opisthokonta	Mesomycetozoa	Ichthyosporea	Ichthyosphonida	Abeoformidae_Group_MAIP_1	Abeoformidae_Group_MAIP_1_X	Abeoformidae_Group_MAIP_1_X_sp.	Flagellated cells
571	0	0	0	4	0	11	0	0	0	0	0	0	0	0	0	Eukaryota	Alveolata	Ciliophora	Prostomatea_1	Prostomatea_1_X	Colepidae	Tiarina	Tiarina_sp.	Ciliophora (Alveolata)
573	0	0	0	0	0	0	4	0	0	0	4	6	0	0	5	Eukaryota	Stramenopiles	Ochrophyta	Chrysophyceae	Chrysophyceae_X	Chrysophyceae_Clade-I	Chrysophyceae_Clade-I_X	Chrysophyceae_Clade-I_X_sp.	Bacillariophyta (Stramenopiles)
574	0	0	68	13	5	0	0	0	0	0	0	0	0	0	0	Eukaryota	Rhizaria	Cercozoa	Filosa-Thecofilosea	Ventricleftida	Verrucomonadidae	Verrucomonas	Verrucomonas_sp.	Flagellated cells
575	0	0	0	0	0	84	0	0	0	0	0	0	0	0	0	Eukaryota	Alveolata	Ciliophora	Spirotrichea	Strombidiida	Strombidiidae	Varistrombidium	Varistrombidium_kielum	Ciliophora (Alveolata)
576	0	0	0	0	0	8	0	0	0	0	0	0	0	0	0	Eukaryota	Stramenopiles	Ochrophyta	Chrysophyceae	Chrysophyceae_X	Chrysophyceae_Clade-I	Chrysophyceae_Clade-I_X	Chrysophyceae_Clade-I_X_sp.	Bacillariophyta (Stramenopiles)
577	0	0	0	0	0	0	0	0	15	0	0	0	0	0	0	Eukaryota	Rhizaria	Cercozoa	Filosa-Imbricatea	Filosa-Imbricatea_X	Novel-clade-2	Novel-clade-2_X	Novel-clade-2_X_sp.	Flagellated cells
578	0	15	18	0	2	8	0	0	0	0	0	0	0	0	0	Eukaryota	Stramenopiles	Ochrophyta	Bacillariophyta	Bacillariophyta_X	Polar-centric-Mediophyceae	Skeletonema	Skeletonema_sp.	Bacillariophyta (Stramenopiles)
579	0	0	0	19	0	69	0	0	0	0	0	0	0	0	0	Eukaryota	Alveolata	Ciliophora	Spirotrichea	Tintinnida	Tintinnidiidae	Tintinnidium	Tintinnidium_sp.	Ciliophora (Alveolata)
580	0	0	0	0	0	0	30	0	0	51	16	0	23	0	229	Eukaryota	Alveolata	Dinoflagellata	Dinophyceae	Dinophyceae_X	Dinophyceae_XX	Dinophyceae_XXX	Dinophyceae_XXX_sp.	Dinoflagellata (Alveolata)
581	0	0	0	0	55	22	0	0	0	0	0	0	0	0	0	Eukaryota	Alveolata	Dinoflagellata	Dinophyceae	Gymnodiniales	Gymnodiniaceae	Gyrodinium	Gyrodinium_spirale	Dinoflagellata (Alveolata)
582	0	0	0	0	0	0	11	15	20	17	32	5	15	32	0	Eukaryota	Rhizaria	Cercozoa	Filosa-Imbricatea	Thaumatomonadida	Thaumatomonadidae	Reckertia	Reckertia_filosa	Flagellated cells
583	0	0	0	4	9	0	0	0	0	0	0	0	0	0	0	Eukaryota	Alveolata	Ciliophora	Spirotrichea	Tintinnida	Eutintinnidae	Eutintinnidae_X	Eutintinnidae_X_sp.	Ciliophora (Alveolata)
584	0	0	0	21	0	22	0	0	0	0	0	0	0	0	0	Eukaryota	Archaeplastida	Chlorophyta	Mamiellophyceae	Mamiellales	Bathycoccaceae	Ostreococcus	Ostreococcus_lucimarinus	Flagellated cells
585	0	0	0	9	0	16	0	0	0	0	0	0	0	0	0	Eukaryota	Stramenopiles	Opalozoa	MAST-3	MAST-3E	MAST-3E_X	MAST-3E_XX	MAST-3E_XX_sp.	Bacillariophyta (Stramenopiles)
586	0	0	0	0	0	0	0	0	0	21	0	0	0	13	8	Eukaryota	Rhizaria	Cercozoa	Filosa-Thecofilosea	Cryomonadida	Protaspa-lineage	Protaspa-lineage_X	Protaspa-lineage_X_sp.	Flagellated cells
587	0	0	14	35	6	9	0	0	0	0	0	0	0	0	0	Eukaryota	Rhizaria	Cercozoa	Filosa-Thecofilosea	Ebriida	Botuliformidae	Botuliformidae_X	Botuliformidae_X_sp.	Flagellated cells
589	0	0	0	0	0	5	0	0	0	0	0	0	0	0	0	Eukaryota	Stramenopiles	Ochrophyta	Chrysophyceae	Chrysophyceae_X	Chrysophyceae_Clade-I	Chrysophyceae_Clade-I_X	Chrysophyceae_Clade-I_X_sp.	Bacillariophyta (Stramenopiles)
590	0	0	0	0	0	0	0	0	0	0	0	0	0	18	0	Eukaryota	Rhizaria	Cercozoa	Filosa-Thecofilosea	Ventricleftida	CCW10-lineage	CCW10-lineage_X	CCW10-lineage_X_sp.	Flagellated cells
591	0	7	0	0	0	0	0	0	0	0	0	0	0	0	0	Eukaryota	Alveolata	Dinoflagellata	Syndiniales	Dino-Group-II	Dino-Group-II-Clade-23	Dino-Group-II-Clade-23_X	Dino-Group-II-Clade-23_X_sp.	Dinoflagellata (Alveolata)
592	0	0	0	0	0	0	13	0	0	0	0	0	0	27	40	Eukaryota	Hacrobia	Picozoa	Picozoa_X	Picozoa_XX	Picozoa_XXX	Picozoa_XXXX	Picozoa_XXXX_sp.	Flagellated cells
593	0	0	0	0	0	0	28	0	0	10	14	0	3	22	0	Eukaryota	Stramenopiles	Ochrophyta	Bacillariophyta	Bacillariophyta_X	Raphid-pennate	Pleurosigma	Pleurosigma_sp.	Bacillariophyta (Stramenopiles)
594	0	0	0	11	16	42	0	0	0	0	0	0	0	0	0	Eukaryota	Hacrobia	Picozoa	Picozoa_X	Picozoa_XX	Picozoa_XXX	Picozoa_XXXX	Picozoa_XXXX_sp.	Flagellated cells
595	0	0	0	0	0	0	7	0	0	0	0	0	0	0	0	Eukaryota	Hacrobia	Haptophyta	Prymnesiophyceae	Prymnesiales	Chrysochromulinaceae	Chrysochromulina	Chrysochromulina_sp.	Flagellated cells
596	0	0	20	0	0	0	0	0	0	0	0	0	0	0	0	Eukaryota	Alveolata	Dinoflagellata	Dinophyceae	Gymnodiniales	Gymnodiniaceae	Gyrodinium	Gyrodinium_fusiforme	Dinoflagellata (Alveolata)
597	0	0	0	0	0	7	0	0	0	0	0	0	0	0	0	Eukaryota	Stramenopiles	Ochrophyta	Chrysophyceae	Chrysophyceae_X	Chrysophyceae_Clade-I	Chrysophyceae_Clade-I_X	Chrysophyceae_Clade-I_X_sp.	Bacillariophyta (Stramenopiles)
599	0	0	0	19	0	0	0	0	0	0	0	0	0	0	0	Eukaryota	Stramenopiles	Ochrophyta	Bacillariophyta	Bacillariophyta_X	Raphid-pennate	Pleurosigma	Pleurosigma_intermedium	Bacillariophyta (Stramenopiles)
600	0	202	3	11	3	18	0	0	0	0	0	0	0	0	0	Eukaryota	Alveolata	Ciliophora	Spirotrichea	Choreotrichida	Strobilidiidae_I	Pelagostrobilidium	Pelagostrobilidium_neptuni	Ciliophora (Alveolata)
601	0	0	0	0	0	9	0	0	0	0	0	0	0	0	0	Eukaryota	Alveolata	Dinoflagellata	Syndiniales	Dino-Group-II	Dino-Group-II-Clade-1	Dino-Group-II-Clade-1_X	Dino-Group-II-Clade-1_X_sp.	Dinoflagellata (Alveolata)
602	0	0	0	0	0	95	0	0	0	0	0	0	0	0	0	Eukaryota	Alveolata	Dinoflagellata	Dinophyceae	Dinophyceae_X	Dinophyceae_XX	Dinophyceae_XXX	Dinophyceae_XXX_sp.	Dinoflagellata (Alveolata)
603	0	0	6	0	0	0	0	0	0	0	0	0	0	0	0	Eukaryota	Rhizaria	Cercozoa	Filosa-Thecofilosea	Cryomonadida	Protaspa-lineage	Protaspa-lineage_X	Protaspa-lineage_X_sp.	Flagellated cells
604	0	0	26	41	15	10	0	0	0	0	0	0	0	0	0	Eukaryota	Archaeplastida	Chlorophyta	Trebouxiophyceae	Chlorellales	Chlorellales_X	Picochlorum	Picochlorum_sp.	Flagellated cells
606	0	0	0	0	0	0	64	0	0	77	0	5	0	0	26	Eukaryota	Stramenopiles	Ochrophyta	Bacillariophyta	Bacillariophyta_X	Polar-centric-Mediophyceae	Cerataulina	Cerataulina_pelagica	Bacillariophyta (Stramenopiles)
607	0	0	18	28	0	9	0	0	0	0	0	0	0	0	0	Eukaryota	Alveolata	Dinoflagellata	Dinophyceae	Peridiniales	Protoperidiniaceae	Protoperidinium	Protoperidinium_bipes	Dinoflagellata (Alveolata)
608	0	0	0	0	0	0	0	0	0	0	0	0	11	0	0	Eukaryota	Rhizaria	Cercozoa	Filosa-Thecofilosea	Ventricleftida	Ventrifissuridae	Ventrifissuridae_X	Ventrifissuridae_X_sp.	Flagellated cells
610	0	0	3	5	0	0	0	0	0	0	0	0	0	0	0	Eukaryota	Rhizaria	Cercozoa	Filosa-Imbricatea	Marimonadida	Marimonadida_X	Marimonadida_XX	Marimonadida_XX_sp.	Flagellated cells
611	10	0	0	0	0	0	0	0	0	0	0	0	0	0	0	Eukaryota	Alveolata	Dinoflagellata	Dinophyceae	Peridiniales	Thoracosphaeraceae	Scrippsiella	Scrippsiella_acuminata	Dinoflagellata (Alveolata)
612	0	0	0	5	0	12	0	0	0	0	0	0	0	0	0	Eukaryota	Alveolata	Ciliophora	Spirotrichea	Choreotrichida	Lynnellidae	Lynnella	Lynnella_semiglobulosa	Ciliophora (Alveolata)
615	0	0	3	31	13	11	0	0	0	0	0	0	0	0	0	Eukaryota	Hacrobia	Picozoa	Picozoa_X	Picozoa_XX	Picozoa_XXX	Picozoa_XXXX	Picozoa_XXXX_sp.	Flagellated cells
617	0	0	0	0	0	0	0	0	0	0	0	0	0	2549	0	Eukaryota	Rhizaria	Cercozoa	Filosa-Thecofilosea	Ebriida	Ebriidae	Ebria	Ebria_tripartita	Flagellated cells
618	0	0	0	0	0	0	140	0	0	0	0	0	0	0	0	Eukaryota	Alveolata	Ciliophora	Spirotrichea	Strombidiida	Strombidiidae_J	Strombidiidae_J_X	Strombidiidae_J_X_sp.	Ciliophora (Alveolata)
619	0	7	0	21	46	234	0	0	0	0	0	0	0	0	0	Eukaryota	Alveolata	Dinoflagellata	Syndiniales	Dino-Group-II	Dino-Group-II-Clade-10-and-11	Dino-Group-II-Clade-10-and-11_X	Dino-Group-II-Clade-10-and-11_X_sp.	Dinoflagellata (Alveolata)
620	0	0	0	0	0	0	158	34	122	0	0	0	0	0	0	Eukaryota	Archaeplastida	Chlorophyta	Mamiellophyceae	Mamiellales	Bathycoccaceae	Ostreococcus	Ostreococcus_tauri	Flagellated cells
621	0	0	0	0	0	0	0	23	39	0	0	0	0	0	0	Eukaryota	Rhizaria	Cercozoa	Filosa-Thecofilosea	Cryomonadida	Protaspa-lineage	Protaspa	Protaspa_obliqua	Flagellated cells
622	0	0	0	0	0	0	0	0	23	0	0	0	0	0	0	Eukaryota	Rhizaria	Cercozoa	Filosa-Thecofilosea	Filosa-Thecofilosea_X	Mataza-lineage	Mataza	Mataza_hastifera	Flagellated cells
623	0	0	0	0	0	0	0	23	0	0	0	0	0	0	0	Eukaryota	Stramenopiles	Ochrophyta	Bolidophyceae	Parmales	Parmales_env_2	Parmales_env_2_X	Parmales_env_2_X_sp.	Bacillariophyta (Stramenopiles)
625	0	0	0	7	0	0	0	0	0	0	0	0	0	0	0	Eukaryota	Opisthokonta	Choanoflagellida	Choanoflagellatea	Acanthoecida	Stephanoecidae_Group_H	Stephanoecidae_Group_H_X	Stephanoecidae_Group_H_X_sp.	Flagellated cells
626	0	6	5	0	0	38	0	0	0	0	0	0	0	0	0	Eukaryota	Hacrobia	Haptophyta	Prymnesiophyceae	Prymnesiales	Chrysochromulinaceae	Chrysochromulina	Chrysochromulina_sp.	Flagellated cells
628	0	0	0	4	0	10	0	0	0	0	0	0	0	0	0	Eukaryota	Alveolata	Dinoflagellata	Syndiniales	Dino-Group-II	Dino-Group-II-Clade-5	Dino-Group-II-Clade-5_X	Dino-Group-II-Clade-5_X_sp.	Dinoflagellata (Alveolata)
629	0	0	0	0	0	0	2994	881	1586	385	659	3563	265	2055	0	Eukaryota	Alveolata	Dinoflagellata	Syndiniales	Dino-Group-I	Dino-Group-I-Clade-1	Dino-Group-I-Clade-1_X	Dino-Group-I-Clade-1_X_sp.	Dinoflagellata (Alveolata)
630	0	0	0	0	0	207	0	0	0	0	0	0	0	0	0	Eukaryota	Alveolata	Dinoflagellata	Syndiniales	Dino-Group-II	Dino-Group-II-Clade-10-and-11	Dino-Group-II-Clade-10-and-11_X	Dino-Group-II-Clade-10-and-11_X_sp.	Dinoflagellata (Alveolata)
631	0	0	0	0	0	0	0	0	0	0	7	0	0	0	0	Eukaryota	Alveolata	Ciliophora	Spirotrichea	Choreotrichida	Strobilidiidae_A	Rimostrombidium_A	Rimostrombidium_A_sp.	Ciliophora (Alveolata)
632	0	0	0	0	0	0	0	85	0	0	0	0	0	0	0	Eukaryota	Alveolata	Ciliophora	Spirotrichea	Tintinnida	Tintinnidiidae	Tintinnidium	Tintinnidium_sp.	Ciliophora (Alveolata)
633	46	0	0	0	0	0	0	0	0	0	0	0	0	0	0	Eukaryota	Alveolata	Dinoflagellata	Dinophyceae	Gymnodiniales	Gymnodiniaceae	Gyrodinium	Gyrodinium_fusiforme	Dinoflagellata (Alveolata)
634	0	24	0	0	0	0	0	0	0	0	0	0	0	0	0	Eukaryota	Opisthokonta	Mesomycetozoa	Ichthyosporea	Ichthyosphonida	Pseudoperkinsidae	Pseudoperkinsidae_X	Pseudoperkinsidae_X_sp.	Flagellated cells
636	0	0	0	0	0	0	0	7	22	0	0	0	0	0	0	Eukaryota	Stramenopiles	Ochrophyta	Bolidophyceae	Parmales	Parmales_env_2	Parmales_env_2_X	Parmales_env_2_X_sp.	Bacillariophyta (Stramenopiles)
637	0	0	0	0	0	0	0	16	0	0	12	0	0	0	0	Eukaryota	Alveolata	Dinoflagellata	Syndiniales	Dino-Group-III	Dino-Group-III_X	Dino-Group-III_XX	Dino-Group-III_XX_sp.	Dinoflagellata (Alveolata)
638	21	0	0	0	0	0	0	0	0	0	0	0	0	0	0	Eukaryota	Alveolata	Dinoflagellata	Syndiniales	Dino-Group-I	Dino-Group-I-Clade-4	Dino-Group-I-Clade-4_X	Dino-Group-I-Clade-4_X_sp.	Dinoflagellata (Alveolata)
640	0	0	0	0	0	0	0	11	0	0	7	0	0	0	0	Eukaryota	Rhizaria	Cercozoa	Filosa-Imbricatea	Thaumatomonadida	Thaumatomonadidae	Thaumatomastix	Thaumatomastix_sp.	Flagellated cells
642	0	0	0	0	0	0	8	6	0	0	0	0	0	0	0	Eukaryota	Rhizaria	Cercozoa	Filosa-Thecofilosea	Cryomonadida	Cryothecomonas-lineage	Cryothecomonas	Cryothecomonas_aestivalis	Flagellated cells
643	0	25	0	9	0	0	0	0	0	0	0	0	0	0	0	Eukaryota	Rhizaria	Cercozoa	Endomyxa	Vampyrellida	Sey055-lineage	Sey055-lineage_X	Sey055-lineage_X_sp.	Flagellated cells
644	0	0	6	0	0	0	0	0	0	0	0	0	0	0	0	Eukaryota	Archaeplastida	Chlorophyta	Trebouxiophyceae	Microthamniales	Microthamniales_X	Trebouxia	Trebouxia_sp.	Flagellated cells
645	0	0	0	0	0	87	0	0	0	0	0	0	0	0	0	Eukaryota	Rhizaria	Cercozoa	Filosa-Imbricatea	Marimonadida	Marimonadida_X	Pseudopirsonia	Pseudopirsonia_mucosa	Flagellated cells
646	0	12	0	62	0	12	0	0	0	0	0	0	0	0	0	Eukaryota	Archaeplastida	Chlorophyta	Mamiellophyceae	Mamiellales	Bathycoccaceae	Ostreococcus	Ostreococcus_tauri	Flagellated cells
648	0	0	0	0	0	0	5	5	8	0	12	0	0	0	0	Eukaryota	Alveolata	Dinoflagellata	Syndiniales	Dino-Group-I	Dino-Group-I-Clade-4	Dino-Group-I-Clade-4_X	Dino-Group-I-Clade-4_X_sp.	Dinoflagellata (Alveolata)
649	0	0	0	0	21	2	0	0	0	0	0	0	0	0	0	Eukaryota	Rhizaria	Cercozoa	Filosa-Thecofilosea	Ebriida	TAGIRI1-lineage	TAGIRI1-lineage_X	TAGIRI1-lineage_X_sp.	Flagellated cells
650	0	43	0	0	0	0	0	0	0	0	0	0	0	0	0	Eukaryota	Stramenopiles	Ochrophyta	Bacillariophyta	Bacillariophyta_X	Polar-centric-Mediophyceae	Chaetoceros	Chaetoceros_danicus	Bacillariophyta (Stramenopiles)
651	0	0	0	0	0	0	0	26	2	0	10	0	0	0	0	Eukaryota	Alveolata	Ciliophora	CONThreeP	CONThreeP_X	CONThreeP_XX	Askenasia	Askenasia_sp.	Ciliophora (Alveolata)
652	0	0	30	16	0	0	0	0	0	0	0	0	0	0	0	Eukaryota	Alveolata	Ciliophora	Spirotrichea	Choreotrichida	Strombidinopsidae	Strombidinopsis	Strombidinopsis_sp.	Ciliophora (Alveolata)
653	0	0	0	0	0	0	0	0	0	0	0	0	0	113	0	Eukaryota	Rhizaria	Cercozoa	Filosa-Thecofilosea	Cryomonadida	Protaspa-lineage	Protaspa-lineage_X	Protaspa-lineage_X_sp.	Flagellated cells
654	0	0	0	0	0	11	0	0	0	0	0	0	0	0	0	Eukaryota	Stramenopiles	Ochrophyta	Chrysophyceae	Chrysophyceae_X	Chrysophyceae_XX	Chrysophyceae_XXX	Chrysophyceae_XXX_sp.	Bacillariophyta (Stramenopiles)
655	0	0	0	3	1	0	0	0	0	0	0	0	0	0	0	Eukaryota	Alveolata	Dinoflagellata	Syndiniales	Dino-Group-II	Dino-Group-II-Clade-15	Dino-Group-II-Clade-15_X	Dino-Group-II-Clade-15_X_sp.	Dinoflagellata (Alveolata)
656	0	17	0	0	131	6	0	0	0	0	0	0	0	0	0	Eukaryota	Opisthokonta	Mesomycetozoa	Ichthyosporea	Ichthyosphonida	Abeoformidae_Group_MAIP_1	Abeoformidae_Group_MAIP_1_X	Abeoformidae_Group_MAIP_1_X_sp.	Flagellated cells
657	0	0	0	0	0	0	0	0	5	0	0	0	0	5	0	Eukaryota	Rhizaria	Cercozoa	Filosa-Thecofilosea	Ebriida	Botuliformidae	Botuliforma	Botuliforma_benthica	Flagellated cells
658	0	0	0	0	0	0	56	24	185	0	31	15	0	0	0	Eukaryota	Stramenopiles	Ochrophyta	Bacillariophyta	Bacillariophyta_X	Polar-centric-Mediophyceae	Thalassiosira	Thalassiosira_profunda	Bacillariophyta (Stramenopiles)
659	0	0	0	0	0	0	53	0	0	0	0	0	0	0	0	Eukaryota	Hacrobia	Picozoa	Picozoa_X	Picozoa_XX	Picozoa_XXX	Picozoa_XXXX	Picozoa_XXXX_sp.	Flagellated cells
660	15	0	0	21	0	28	0	0	0	0	0	0	0	0	0	Eukaryota	Alveolata	Ciliophora	Spirotrichea	Strombidiida_B	Strombidiida_B_X	Strombidiida_B_XX	Strombidiida_B_XX_sp.	Ciliophora (Alveolata)
661	0	0	0	0	0	0	17	0	0	0	0	0	0	0	0	Eukaryota	Hacrobia	Haptophyta	Prymnesiophyceae	Prymnesiales	Prymnesiophyceae_Clade_B4	Prymnesiophyceae_Clade_B4_X	Prymnesiophyceae_Clade_B4_X_sp.	Flagellated cells
662	0	0	0	0	0	0	10	0	0	0	0	0	0	0	0	Eukaryota	Alveolata	Ciliophora	Spirotrichea	Strombidiida	Strombidiidae_Q	Strombidiidae_Q_X	Strombidiidae_Q_X_sp.	Ciliophora (Alveolata)
663	21	0	0	0	0	0	0	0	0	0	0	0	0	0	0	Eukaryota	Opisthokonta	Mesomycetozoa	Ichthyosporea	Ichthyosphonida	Abeoformidae_Group_MAIP_1	Abeoformidae_Group_MAIP_1_X	Abeoformidae_Group_MAIP_1_X_sp.	Flagellated cells
664	0	0	0	0	0	0	0	17	16	0	0	0	0	0	15	Eukaryota	Alveolata	Ciliophora	Spirotrichea	Strombidiida	Strombidiidae_B	Strombidiidae_B_X	Strombidiidae_B_X_sp.	Ciliophora (Alveolata)
666	0	0	0	0	0	0	0	0	16	0	19	0	0	0	0	Eukaryota	Rhizaria	Cercozoa	Filosa-Thecofilosea	Cryomonadida	Protaspa-lineage	Protaspa	Protaspa_grandis	Flagellated cells
668	0	0	0	6	0	0	0	0	0	0	0	0	0	0	0	Eukaryota	Alveolata	Ciliophora	Litostomatea	Haptoria_4	Didiniidae	Didiniidae_X	Didiniidae_X_sp.	Ciliophora (Alveolata)
669	0	0	0	0	0	0	23	0	0	0	0	0	0	0	0	Eukaryota	Alveolata	Dinoflagellata	Syndiniales	Dino-Group-I	Dino-Group-I-Clade-4	Dino-Group-I-Clade-4_X	Dino-Group-I-Clade-4_X_sp.	Dinoflagellata (Alveolata)
670	0	0	0	0	0	0	0	0	0	0	0	0	14	0	0	Eukaryota	Rhizaria	Cercozoa	Filosa-Thecofilosea	Ebriida	Botuliformidae	Botuliformidae_X	Botuliformidae_X_sp.	Flagellated cells
671	0	0	0	0	0	0	45	0	0	0	0	0	0	0	0	Eukaryota	Hacrobia	Picozoa	Picozoa_X	Picozoa_XX	Picozoa_XXX	Picozoa_XXXX	Picozoa_XXXX_sp.	Flagellated cells
672	0	0	0	0	0	0	0	20	0	0	0	0	0	0	0	Eukaryota	Alveolata	Ciliophora	Oligohymenophorea	Scuticociliatia_1	Thigmophryidae	Myxophyllum	Myxophyllum_sp.	Ciliophora (Alveolata)
673	0	0	0	0	0	0	110	30	19	0	97	0	0	0	0	Eukaryota	Alveolata	Ciliophora	Spirotrichea	Choreotrichida	Strobilidiidae_I	Pelagostrobilidium	Pelagostrobilidium_paraepacrum	Ciliophora (Alveolata)
676	0	0	0	0	0	0	0	0	0	0	0	0	0	12	0	Eukaryota	Rhizaria	Cercozoa	Filosa-Imbricatea	Marimonadida	Marimonadida_X	Marimonadida_XX	Marimonadida_XX_sp.	Flagellated cells
677	0	0	0	0	0	0	0	0	14	0	0	0	0	0	0	Eukaryota	Alveolata	Dinoflagellata	Dinophyceae	Peridiniales	Thoracosphaeraceae	Scrippsiella	Scrippsiella_acuminata	Dinoflagellata (Alveolata)
678	2	0	0	16	0	71	0	0	0	0	0	0	0	0	0	Eukaryota	Rhizaria	Cercozoa	Filosa-Thecofilosea	Cryomonadida	Protaspa-lineage	Protaspa-lineage_X	Protaspa-lineage_X_sp.	Flagellated cells
679	0	0	0	0	0	0	0	6	0	0	0	0	0	0	0	Eukaryota	Alveolata	Ciliophora	Litostomatea	Haptoria_6	Lacrymariidae	Lacrymaria	Lacrymaria_marina	Ciliophora (Alveolata)
680	0	0	0	41	27	91	0	0	0	0	0	0	0	0	0	Eukaryota	Alveolata	Ciliophora	CONTH_6	CONTH_6_X	CONTH_6_XX	CONTH_6_XXX	CONTH_6_XXX_sp.	Ciliophora (Alveolata)
681	0	0	0	0	0	0	0	0	0	0	0	0	0	0	13	Eukaryota	Rhizaria	Cercozoa	Filosa-Imbricatea	Marimonadida	Marimonadida_X	Pseudopirsonia	Pseudopirsonia_mucosa	Flagellated cells
684	0	0	0	0	102	5	0	0	0	0	0	0	0	0	0	Eukaryota	Stramenopiles	Ochrophyta	Dictyochophyceae	Dictyochophyceae_X	Dictyochales	Dictyocha	Dictyocha_globosa	Bacillariophyta (Stramenopiles)
685	0	0	0	0	0	0	0	0	0	9	0	0	0	0	8	Eukaryota	Rhizaria	Cercozoa	Filosa-Thecofilosea	Cryomonadida	Protaspa-lineage	Protaspa-lineage_X	Protaspa-lineage_X_sp.	Flagellated cells
686	0	0	0	0	0	0	0	0	0	0	0	8	0	0	0	Eukaryota	Archaeplastida	Streptophyta	Embryophyceae	Embryophyceae_X	Embryophyceae_XX	Populus	Populus_trichocarpa	Flagellated cells
687	85	0	0	0	0	0	0	0	0	0	0	0	0	0	0	Eukaryota	Alveolata	Dinoflagellata	Dinophyceae	Dinophyceae_X	Dinophyceae_XX	Dinophyceae_XXX	Dinophyceae_XXX_sp.	Dinoflagellata (Alveolata)
688	0	0	0	0	0	0	0	31	0	0	10	0	0	0	0	Eukaryota	Hacrobia	Cryptophyta	Cryptophyceae	Cryptomonadales	Cryptomonadales_X	Rhodomonas	Rhodomonas_sp.	Flagellated cells
689	0	0	0	0	1461	304	0	0	0	0	0	0	0	0	0	Eukaryota	Alveolata	Dinoflagellata	Dinophyceae	Gymnodiniales	Gymnodiniaceae	Gyrodinium	Gyrodinium_fusiforme	Dinoflagellata (Alveolata)
690	0	0	0	0	0	34	0	0	0	0	0	0	0	0	0	Eukaryota	Hacrobia	Picozoa	Picozoa_X	Picozoa_XX	Picozoa_XXX	Picozoa_XXXX	Picozoa_XXXX_sp.	Flagellated cells
692	0	0	0	0	0	9	0	0	0	0	0	0	0	0	0	Eukaryota	Alveolata	Dinoflagellata	Syndiniales	Dino-Group-II	Dino-Group-II-Clade-5	Dino-Group-II-Clade-5_X	Dino-Group-II-Clade-5_X_sp.	Dinoflagellata (Alveolata)
693	0	0	0	0	0	0	60	0	0	0	0	0	0	0	0	Eukaryota	Hacrobia	Haptophyta	Prymnesiophyceae	Prymnesiales	Chrysochromulinaceae	Chrysochromulina	Chrysochromulina_sp.	Flagellated cells
694	0	0	0	0	0	0	0	0	41	0	0	0	0	0	0	Eukaryota	Stramenopiles	Ochrophyta	Bacillariophyta	Bacillariophyta_X	Polar-centric-Mediophyceae	Thalassiosira	Thalassiosira_minima	Bacillariophyta (Stramenopiles)
695	0	0	0	29	10	33	0	0	0	0	0	0	0	0	0	Eukaryota	Stramenopiles	Ochrophyta	Bacillariophyta	Bacillariophyta_X	Raphid-pennate	Navicula	Navicula_lanceolata	Bacillariophyta (Stramenopiles)
696	0	0	0	943	0	15	0	0	0	0	0	0	0	0	0	Eukaryota	Rhizaria	Cercozoa	Filosa-Thecofilosea	Ebriida	Ebriidae	Ebria	Ebria_tripartita	Flagellated cells
697	0	0	0	0	0	0	12	0	0	15	11	5	1	7	47	Eukaryota	Stramenopiles	Ochrophyta	Bacillariophyta	Bacillariophyta_X	Radial-centric-basal-Coscinodiscophyceae	Rhizosolenia	Rhizosolenia_similoides	Bacillariophyta (Stramenopiles)
698	0	0	0	0	7	47	0	0	0	0	0	0	0	0	0	Eukaryota	Alveolata	Dinoflagellata	Syndiniales	Dino-Group-II	Dino-Group-II-Clade-4	Dino-Group-II-Clade-4_X	Dino-Group-II-Clade-4_X_sp.	Dinoflagellata (Alveolata)
699	0	0	3	13	0	0	0	0	0	0	0	0	0	0	0	Eukaryota	Stramenopiles	Ochrophyta	Bacillariophyta	Bacillariophyta_X	Polar-centric-Mediophyceae	Cerataulina	Cerataulina_pelagica	Bacillariophyta (Stramenopiles)
700	0	0	0	0	0	0	0	0	16	0	0	0	0	0	0	Eukaryota	Hacrobia	Haptophyta	Prymnesiophyceae	Phaeocystales	Phaeocystaceae	Phaeocystis	Phaeocystis_cordata	Flagellated cells
701	0	0	0	0	193	1181	0	0	0	0	0	0	0	0	0	Eukaryota	Alveolata	Dinoflagellata	Dinophyceae	Gymnodiniales	Gymnodiniaceae	Gymnodinium	Gymnodinium_sp.	Dinoflagellata (Alveolata)
702	0	0	0	11	34	49	0	0	0	0	0	0	0	0	0	Eukaryota	Alveolata	Dinoflagellata	Syndiniales	Dino-Group-II	Dino-Group-II-Clade-10-and-11	Dino-Group-II-Clade-10-and-11_X	Dino-Group-II-Clade-10-and-11_X_sp.	Dinoflagellata (Alveolata)
704	0	0	0	0	0	0	0	16	18	0	44	677	21	5	0	Eukaryota	Stramenopiles	Opalozoa	MAST-12	MAST-12E	MAST-12E_X	MAST-12E_XX	MAST-12E_XX_sp.	Bacillariophyta (Stramenopiles)
706	0	0	0	63	42	31	0	0	0	0	0	0	0	0	0	Eukaryota	Archaeplastida	Chlorophyta	Mamiellophyceae	Mamiellales	Mamiellaceae	Mamiella	Mamiella_gilva	Flagellated cells
708	18	0	0	0	0	0	0	0	0	0	0	0	0	0	0	Eukaryota	Alveolata	Dinoflagellata	Dinophyceae	Dinophyceae_X	Dinophyceae_XX	Dinophyceae_XXX	Dinophyceae_XXX_sp.	Dinoflagellata (Alveolata)
709	0	0	0	0	0	0	0	0	0	38	0	0	0	0	0	Eukaryota	Alveolata	Dinoflagellata	Dinophyceae	Dinophyceae_X	Dinophyceae_XX	Dinophyceae_XXX	Dinophyceae_XXX_sp.	Dinoflagellata (Alveolata)
710	0	0	0	0	45	0	0	0	0	0	0	0	0	0	0	Eukaryota	Rhizaria	Cercozoa	Filosa-Thecofilosea	Cryomonadida	Protaspa-lineage	Protaspa-lineage_X	Protaspa-lineage_X_sp.	Flagellated cells
711	0	0	0	0	0	0	0	11	4	4	0	0	0	0	0	Eukaryota	Rhizaria	Cercozoa	Filosa-Imbricatea	Thaumatomonadida	Thaumatomonadidae	Reckertia	Reckertia_filosa	Flagellated cells
713	0	0	0	14	0	6	0	0	0	0	0	0	0	0	0	Eukaryota	Rhizaria	Cercozoa	Filosa-Thecofilosea	Cryomonadida	Protaspa-lineage	Protaspa-lineage_X	Protaspa-lineage_X_sp.	Flagellated cells
714	0	0	0	0	0	17	0	0	0	0	0	0	0	0	0	Eukaryota	Archaeplastida	Chlorophyta	Mamiellophyceae	Mamiellales	Mamiellaceae	Mamiella	Mamiella_gilva	Flagellated cells
715	0	0	0	0	0	0	0	0	0	0	0	10	0	0	0	Eukaryota	Stramenopiles	Stramenopiles_X	Stramenopiles_XX	Stramenopiles_XXX	Stramenopiles_XXXX	Stramenopiles_XXXXX	Stramenopiles_XXXXX_sp.	Bacillariophyta (Stramenopiles)
716	0	0	0	0	0	0	30	0	0	0	0	0	0	0	0	Eukaryota	Alveolata	Ciliophora	CONThreeP	CONThreeP_X	CONThreeP_XX	Askenasia	Askenasia_sp.	Ciliophora (Alveolata)
717	0	0	0	0	0	0	0	0	12	0	0	0	0	0	0	Eukaryota	Rhizaria	Cercozoa	Filosa-Imbricatea	Euglyphida	Paulinellidae	Paulinella	Paulinella_chromatophora	Flagellated cells
719	0	0	0	0	0	0	0	50	19	0	0	0	0	0	0	Eukaryota	Alveolata	Ciliophora	Spirotrichea	Choreotrichida	Choreotrichida_X	Choreotrichida_XX	Choreotrichida_XX_sp.	Ciliophora (Alveolata)
720	0	0	0	0	0	0	0	52	0	0	0	0	0	0	0	Eukaryota	Alveolata	Dinoflagellata	Dinophyceae	Peridiniales	Thoracosphaeraceae	Thoracosphaeraceae_X	Thoracosphaeraceae_X_sp.	Dinoflagellata (Alveolata)
722	0	0	0	22	0	0	0	0	0	0	0	0	0	0	0	Eukaryota	Alveolata	Dinoflagellata	Syndiniales	Dino-Group-I	Dino-Group-I-Clade-4	Dino-Group-I-Clade-4_X	Dino-Group-I-Clade-4_X_sp.	Dinoflagellata (Alveolata)
723	0	14	4	5	0	0	0	0	0	0	0	0	0	0	0	Eukaryota	Rhizaria	Cercozoa	Filosa-Thecofilosea	Cryomonadida	Protaspa-lineage	Protaspa	Protaspa_obliqua	Flagellated cells
724	0	0	0	0	0	0	2	0	7	8	0	0	0	10	0	Eukaryota	Stramenopiles	Ochrophyta	Bacillariophyta	Bacillariophyta_X	Polar-centric-Mediophyceae	Thalassiosira	Thalassiosira_minima	Bacillariophyta (Stramenopiles)
725	0	0	0	0	0	0	45	42	0	0	0	0	0	0	0	Eukaryota	Alveolata	Dinoflagellata	Syndiniales	Dino-Group-II	Dino-Group-II-Clade-10-and-11	Dino-Group-II-Clade-10-and-11_X	Dino-Group-II-Clade-10-and-11_X_sp.	Dinoflagellata (Alveolata)
726	0	0	0	0	0	0	0	0	0	0	0	32	0	0	0	Eukaryota	Alveolata	Dinoflagellata	Syndiniales	Dino-Group-I	Dino-Group-I-Clade-4	Dino-Group-I-Clade-4_X	Dino-Group-I-Clade-4_X_sp.	Dinoflagellata (Alveolata)
727	0	0	0	0	0	0	3	0	9	0	9	0	0	17	0	Eukaryota	Hacrobia	Picozoa	Picozoa_X	Picozoa_XX	Picozoa_XXX	Picozoa_XXXX	Picozoa_XXXX_sp.	Flagellated cells
729	0	0	0	0	0	0	0	0	6	0	0	0	0	0	0	Eukaryota	Rhizaria	Cercozoa	Filosa-Sarcomonadea	Cercomonadida	Cercomonadidae	Cercomonas	Cercomonas_edax	Flagellated cells
731	0	0	0	0	0	0	8	12	0	0	0	0	0	0	0	Eukaryota	Stramenopiles	Ochrophyta	Dictyochophyceae	Dictyochophyceae_X	Dictyochales	Dictyocha	Dictyocha_speculum	Bacillariophyta (Stramenopiles)
733	22	0	0	0	0	0	0	0	0	0	0	0	0	0	0	Eukaryota	Rhizaria	Cercozoa	Filosa-Thecofilosea	Cryomonadida	Protaspa-lineage	Protaspa-lineage_X	Protaspa-lineage_X_sp.	Flagellated cells
734	0	0	0	0	197	182	0	0	0	0	0	0	0	0	0	Eukaryota	Alveolata	Dinoflagellata	Dinophyceae	Gymnodiniales	Gymnodiniaceae	Gyrodinium	Gyrodinium_fusiforme	Dinoflagellata (Alveolata)
736	0	0	6	0	0	0	0	0	0	0	0	0	0	0	0	Eukaryota	Alveolata	Dinoflagellata	Dinophyceae	Gonyaulacales	Ceratiaceae	Tripos	Tripos_furca	Dinoflagellata (Alveolata)
737	0	0	0	0	0	4	0	0	0	0	0	0	0	0	0	Eukaryota	Alveolata	Dinoflagellata	Dinophyceae	Dinophyceae_X	Dinophyceae_XX	Dinophyceae_XXX	Dinophyceae_XXX_sp.	Dinoflagellata (Alveolata)
739	0	0	0	0	18	41	0	0	0	0	0	0	0	0	0	Eukaryota	Alveolata	Dinoflagellata	Dinophyceae	Gymnodiniales	Gymnodiniaceae	Gymnodinium	Gymnodinium_sp.	Dinoflagellata (Alveolata)
741	0	0	0	0	0	11	0	0	0	0	0	0	0	0	0	Eukaryota	Rhizaria	Cercozoa	Filosa-Imbricatea	Filosa-Imbricatea_X	Novel-clade-2	Novel-clade-2_X	Novel-clade-2_X_sp.	Flagellated cells
742	0	12	0	0	0	16	0	0	0	0	0	0	0	0	0	Eukaryota	Hacrobia	Picozoa	Picozoa_X	Picozoa_XX	Picozoa_XXX	Picozoa_XXXX	Picozoa_XXXX_sp.	Flagellated cells
743	0	0	25	74	0	0	0	0	0	0	0	0	0	0	0	Eukaryota	Alveolata	Dinoflagellata	Dinophyceae	Peridiniales	Heterocapsaceae	Heterocapsa	Heterocapsa_nei/rotundata	Dinoflagellata (Alveolata)
744	0	0	0	0	0	0	0	0	0	14	0	0	0	30	0	Eukaryota	Stramenopiles	Ochrophyta	Bacillariophyta	Bacillariophyta_X	Radial-centric-basal-Coscinodiscophyceae	Coscinodiscus	Coscinodiscus_jonesianus	Bacillariophyta (Stramenopiles)
746	0	0	0	7	0	0	0	0	0	0	0	0	0	0	0	Eukaryota	Rhizaria	Cercozoa	Filosa-Imbricatea	Filosa-Imbricatea_X	Novel-clade-2	Novel-clade-2_X	Novel-clade-2_X_sp.	Flagellated cells
747	0	0	0	13	0	0	0	0	0	0	0	0	0	0	0	Eukaryota	Rhizaria	Cercozoa	Filosa-Thecofilosea	Ebriida	TAGIRI1-lineage	TAGIRI1-lineage_X	TAGIRI1-lineage_X_sp.	Flagellated cells
748	0	0	6	0	0	0	0	0	0	0	0	0	0	0	0	Eukaryota	Alveolata	Ciliophora	Spirotrichea	Tintinnida	TIN_11	Helicostomella	Helicostomella_subulata	Ciliophora (Alveolata)
749	0	0	0	5	0	2	0	0	0	0	0	0	0	0	0	Eukaryota	Alveolata	Ciliophora	Spirotrichea	Strombidiida	Strombidiidae_Q	Strombidiidae_Q_X	Strombidiidae_Q_X_sp.	Ciliophora (Alveolata)
751	0	0	0	0	0	0	0	0	108	2	0	0	0	0	0	Eukaryota	Rhizaria	Cercozoa	Filosa-Thecofilosea	Cryomonadida	Protaspa-lineage	Protaspa-lineage_X	Protaspa-lineage_X_sp.	Flagellated cells
753	0	0	0	0	0	0	0	0	0	25	0	0	0	0	0	Eukaryota	Alveolata	Ciliophora	Oligohymenophorea	Scuticociliatia_1	Thigmophryidae	Myxophyllum	Myxophyllum_sp.	Ciliophora (Alveolata)
755	0	0	0	0	0	0	4	0	0	0	0	0	0	0	0	Eukaryota	Alveolata	Dinoflagellata	Syndiniales	Dino-Group-III	Dino-Group-III_X	Dino-Group-III_XX	Dino-Group-III_XX_sp.	Dinoflagellata (Alveolata)
756	0	18	7	0	0	0	0	0	0	0	0	0	0	0	0	Eukaryota	Alveolata	Dinoflagellata	Dinophyceae	Peridiniales	Heterocapsaceae	Heterocapsa	Heterocapsa_sp.	Dinoflagellata (Alveolata)
757	0	0	0	0	0	0	10	0	4	0	0	0	0	6	0	Eukaryota	Stramenopiles	Ochrophyta	Bacillariophyta	Bacillariophyta_X	Polar-centric-Mediophyceae	Odontella	Odontella_sinensis	Bacillariophyta (Stramenopiles)
759	0	0	0	0	0	0	0	0	0	0	3	9	0	0	0	Eukaryota	Archaeplastida	Chlorophyta	Trebouxiophyceae	Trebouxiophyceae_X	Trebouxiophyceae_XX	Choricystis	Choricystis_sp.	Flagellated cells
760	0	0	0	0	12	0	0	0	0	0	0	0	0	0	0	Eukaryota	Rhizaria	Cercozoa	Filosa-Thecofilosea	Ebriida	TAGIRI1-lineage	TAGIRI1-lineage_X	TAGIRI1-lineage_X_sp.	Flagellated cells
761	0	0	6	19	0	18	0	0	0	0	0	0	0	0	0	Eukaryota	Stramenopiles	Ochrophyta	Bacillariophyta	Bacillariophyta_X	Raphid-pennate	Tenuicylindrus	Tenuicylindrus_belgicus	Bacillariophyta (Stramenopiles)
763	0	0	0	0	32	0	0	0	0	0	0	0	0	0	0	Eukaryota	Alveolata	Dinoflagellata	Syndiniales	Dino-Group-I	Dino-Group-I-Clade-1	Dino-Group-I-Clade-1_X	Dino-Group-I-Clade-1_X_sp.	Dinoflagellata (Alveolata)
765	0	0	0	0	0	0	0	0	0	0	0	0	0	37	0	Eukaryota	Rhizaria	Cercozoa	Filosa-Thecofilosea	Ventricleftida	Ventrifissuridae	Ventrifissuridae_X	Ventrifissuridae_X_sp.	Flagellated cells
766	0	0	0	0	0	0	0	18	0	0	0	0	0	0	0	Eukaryota	Rhizaria	Cercozoa	Filosa-Imbricatea	Marimonadida	Marimonadida_X	Pseudopirsonia	Pseudopirsonia_mucosa	Flagellated cells
767	0	0	0	0	198	61	0	0	0	0	0	0	0	0	0	Eukaryota	Alveolata	Dinoflagellata	Dinophyceae	Gymnodiniales	Warnowiaceae	Warnowia	Warnowia_sp.	Dinoflagellata (Alveolata)
768	0	0	0	0	11	0	0	0	0	0	0	0	0	0	0	Eukaryota	Stramenopiles	Ochrophyta	Dictyochophyceae	Dictyochophyceae_X	Dictyochales	Dictyocha	Dictyocha_speculum	Bacillariophyta (Stramenopiles)
769	0	0	0	0	0	0	0	0	0	0	0	0	0	4	6	Eukaryota	Opisthokonta	Mesomycetozoa	Ichthyosporea	Ichthyosphonida	Pseudoperkinsidae	Pseudoperkinsidae_X	Pseudoperkinsidae_X_sp.	Flagellated cells
770	0	0	0	0	0	0	0	0	0	0	5	0	0	0	0	Eukaryota	Rhizaria	Cercozoa	Filosa-Imbricatea	Thaumatomonadida	Esquamulidae	Esquamula	Esquamula_lacrimiformis	Flagellated cells
771	3	0	0	0	0	0	0	0	0	0	0	0	0	0	0	Eukaryota	Archaeplastida	Chlorophyta	Chloropicophyceae	Chloropicales	Chloropicaceae	Chloroparvula	Chloroparvula_pacifica	Flagellated cells
772	0	0	0	5	0	0	0	0	0	0	0	0	0	0	0	Eukaryota	Alveolata	Dinoflagellata	Dinophyceae	Dinophyceae_X	Dinophyceae_XX	Dinophyceae_XXX	Dinophyceae_XXX_sp.	Dinoflagellata (Alveolata)
773	0	0	0	0	0	0	0	0	0	0	3	0	0	0	0	Eukaryota	Rhizaria	Cercozoa	Filosa-Thecofilosea	Ventricleftida	CCW10-lineage	CCW10-lineage_X	CCW10-lineage_X_sp.	Flagellated cells
774	0	0	0	0	0	0	0	0	0	11	0	0	0	0	0	Eukaryota	Alveolata	Dinoflagellata	Dinophyceae	Gonyaulacales	Gonyaulacaceae	Gonyaulax	Gonyaulax_spinifera	Dinoflagellata (Alveolata)
776	0	0	0	0	0	0	0	64	9	0	0	0	0	0	0	Eukaryota	Stramenopiles	Ochrophyta	Bacillariophyta	Bacillariophyta_X	Polar-centric-Mediophyceae	Biddulphia	Biddulphia_sp.	Bacillariophyta (Stramenopiles)
777	0	0	0	0	0	0	0	0	0	10	3	0	0	0	0	Eukaryota	Rhizaria	Cercozoa	Filosa-Imbricatea	Euglyphida	Paulinellidae	Paulinella	Paulinella_chromatophora	Flagellated cells
778	776	0	0	12	0	0	0	0	0	0	0	0	0	0	0	Eukaryota	Rhizaria	Cercozoa	Filosa-Thecofilosea	Ebriida	TAGIRI1-lineage	TAGIRI1-lineage_X	TAGIRI1-lineage_X_sp.	Flagellated cells
779	0	0	0	0	0	11	0	0	0	0	0	0	0	0	0	Eukaryota	Rhizaria	Cercozoa	Filosa-Imbricatea	Filosa-Imbricatea_X	Novel-clade-2	Novel-clade-2_X	Novel-clade-2_X_sp.	Flagellated cells
780	0	0	4	0	0	0	0	0	0	0	0	0	0	0	0	Eukaryota	Stramenopiles	Ochrophyta	Dictyochophyceae	Dictyochophyceae_X	Dictyochales	Dictyocha	Dictyocha_speculum	Bacillariophyta (Stramenopiles)
781	0	0	0	0	0	0	10	290	154	0	10	0	0	0	0	Eukaryota	Stramenopiles	Ochrophyta	Bolidophyceae	Parmales	Parmales_env_2	Parmales_env_2_X	Parmales_env_2_X_sp.	Bacillariophyta (Stramenopiles)
783	0	0	0	0	0	0	48	9	0	7	0	0	0	0	0	Eukaryota	Stramenopiles	Ochrophyta	Bacillariophyta	Bacillariophyta_X	Raphid-pennate	Pleurosigma	Pleurosigma_sp.	Bacillariophyta (Stramenopiles)
784	0	0	0	0	0	0	0	0	42	14	6	116	15	14	0	Eukaryota	Rhizaria	Cercozoa	Filosa-Thecofilosea	Ebriida	TAGIRI1-lineage	TAGIRI1-lineage_X	TAGIRI1-lineage_X_sp.	Flagellated cells
786	0	0	0	0	0	0	0	0	0	0	0	0	0	6	0	Eukaryota	Rhizaria	Cercozoa	Filosa-Imbricatea	Thaumatomonadida	Thaumatomonadida_X	Thaumatomonadida_XX	Thaumatomonadida_XX_sp.	Flagellated cells
787	0	0	4	8	4	0	0	0	0	0	0	0	0	0	0	Eukaryota	Stramenopiles	Ochrophyta	Bacillariophyta	Bacillariophyta_X	Radial-centric-basal-Coscinodiscophyceae	Coscinodiscus	Coscinodiscus_radiatus	Bacillariophyta (Stramenopiles)
789	0	0	0	28	7	7	0	0	0	0	0	0	0	0	0	Eukaryota	Alveolata	Dinoflagellata	Syndiniales	Dino-Group-II	Dino-Group-II-Clade-10-and-11	Dino-Group-II-Clade-10-and-11_X	Dino-Group-II-Clade-10-and-11_X_sp.	Dinoflagellata (Alveolata)
790	0	0	5	6	4	11	0	0	0	0	0	0	0	0	0	Eukaryota	Hacrobia	Picozoa	Picozoa_X	Picozoa_XX	Picozoa_XXX	Picozoa_XXXX	Picozoa_XXXX_sp.	Flagellated cells
791	0	0	14	0	0	0	0	0	0	0	0	0	0	0	0	Eukaryota	Rhizaria	Cercozoa	Filosa-Thecofilosea	Ventricleftida	Ventrifissuridae	Ventrifissuridae_X	Ventrifissuridae_X_sp.	Flagellated cells
792	0	0	0	0	0	0	15	0	0	0	0	0	0	0	0	Eukaryota	Rhizaria	Cercozoa	Filosa-Imbricatea	Filosa-Imbricatea_X	Novel-clade-2	Novel-clade-2_X	Novel-clade-2_X_sp.	Flagellated cells
793	19	0	0	0	0	0	0	0	0	0	0	0	0	0	0	Eukaryota	Rhizaria	Cercozoa	Filosa-Thecofilosea	Cryomonadida	Protaspa-lineage	Protaspa-lineage_X	Protaspa-lineage_X_sp.	Flagellated cells
794	0	0	0	0	0	0	0	0	8	0	0	0	0	0	0	Eukaryota	Rhizaria	Cercozoa	Filosa-Thecofilosea	Cryomonadida	Protaspa-lineage	Protaspa-lineage_X	Protaspa-lineage_X_sp.	Flagellated cells
795	19	0	0	0	0	0	0	0	0	0	0	0	0	0	0	Eukaryota	Alveolata	Dinoflagellata	Dinophyceae	Gymnodiniales	Gymnodiniaceae	Gyrodinium	Gyrodinium_fusiforme	Dinoflagellata (Alveolata)
796	0	0	0	0	0	0	0	0	0	36	0	0	0	0	0	Eukaryota	Rhizaria	Cercozoa	Filosa-Imbricatea	Filosa-Imbricatea_X	Novel-clade-2	Novel-clade-2_X	Novel-clade-2_X_sp.	Flagellated cells
797	0	0	0	0	0	0	0	0	0	0	0	0	0	0	24	Eukaryota	Alveolata	Ciliophora	Litostomatea	Litostomatea_X	Litostomatea_XX	Litostomatea_XXX	Litostomatea_XXX_sp.	Ciliophora (Alveolata)
798	0	0	0	0	11	17	0	0	0	0	0	0	0	0	0	Eukaryota	Rhizaria	Cercozoa	Filosa-Thecofilosea	Cryomonadida	Cryothecomonas-lineage	Cryothecomonas	Cryothecomonas_aestivalis	Flagellated cells
799	0	0	0	0	0	0	225	0	32	124	0	0	0	0	0	Eukaryota	Alveolata	Dinoflagellata	Dinophyceae	Gymnodiniales	Gymnodiniaceae	Gyrodinium	Gyrodinium_fusiforme	Dinoflagellata (Alveolata)
800	0	0	0	0	0	0	0	9	0	0	0	0	0	0	0	Eukaryota	Hacrobia	Haptophyta	Prymnesiophyceae	Prymnesiales	Chrysochromulinaceae	Chrysochromulina	Chrysochromulina_sp.	Flagellated cells
802	0	0	0	0	9	0	0	0	0	0	0	0	0	0	0	Eukaryota	Rhizaria	Cercozoa	Filosa-Thecofilosea	Cryomonadida	Protaspa-lineage	Protaspa-lineage_X	Protaspa-lineage_X_sp.	Flagellated cells
803	0	0	0	0	0	0	6	0	0	0	0	0	0	0	0	Eukaryota	Hacrobia	Haptophyta	Prymnesiophyceae	Prymnesiales	Chrysochromulinaceae	Chrysochromulina	Chrysochromulina_sp.	Flagellated cells
804	0	0	0	0	0	0	0	0	14	0	0	0	0	0	0	Eukaryota	Archaeplastida	Chlorophyta	Mamiellophyceae	Mamiellales	Mamiellaceae	Mamiella	Mamiella_gilva	Flagellated cells
805	0	0	0	0	0	0	0	0	0	66	5	0	0	0	54	Eukaryota	Alveolata	Dinoflagellata	Dinophyceae	Dinophyceae_X	Dinophyceae_XX	Dinophyceae_XXX	Dinophyceae_XXX_sp.	Dinoflagellata (Alveolata)
806	0	80	40	124	28	0	0	0	0	0	0	0	0	0	0	Eukaryota	Stramenopiles	Ochrophyta	Bacillariophyta	Bacillariophyta_X	Raphid-pennate	Cymbella	Cymbella_similis	Bacillariophyta (Stramenopiles)
807	0	0	0	0	0	0	30	11	13	0	0	0	0	0	0	Eukaryota	Stramenopiles	Ochrophyta	Dictyochophyceae	Dictyochophyceae_X	Florenciellales	Florenciella	Florenciella_parvula	Bacillariophyta (Stramenopiles)
808	0	0	0	0	0	0	0	0	0	0	11	0	0	0	0	Eukaryota	Rhizaria	Cercozoa	Filosa-Imbricatea	Filosa-Imbricatea_X	Novel-clade-2	Novel-clade-2_X	Novel-clade-2_X_sp.	Flagellated cells
809	0	0	0	0	0	0	5	0	0	0	0	0	0	0	0	Eukaryota	Stramenopiles	Ochrophyta	Dictyochophyceae	Dictyochophyceae_X	Florenciellales	Florenciellales_X	Florenciellales_X_sp.	Bacillariophyta (Stramenopiles)
810	0	0	0	0	0	0	0	2	1	6	1	0	0	0	0	Eukaryota	Alveolata	Ciliophora	Spirotrichea	Strombidiida	Strombidiidae_Q	Strombidiidae_Q_X	Strombidiidae_Q_X_sp.	Ciliophora (Alveolata)
811	0	0	0	0	0	0	27	0	62	0	0	0	0	0	0	Eukaryota	Stramenopiles	Ochrophyta	Bacillariophyta	Bacillariophyta_X	Polar-centric-Mediophyceae	Thalassiosira	Thalassiosira_profunda	Bacillariophyta (Stramenopiles)
812	0	0	0	0	0	7	0	0	0	0	0	0	0	0	0	Eukaryota	Stramenopiles	Ochrophyta	Dictyochophyceae	Dictyochophyceae_X	Florenciellales	Florenciellales_X	Florenciellales_X_sp.	Bacillariophyta (Stramenopiles)
814	0	0	0	0	0	0	0	12	0	0	0	0	0	0	0	Eukaryota	Alveolata	Dinoflagellata	Dinophyceae	Dinophysiales	Amphisoleniaceae	Amphisoleniaceae_X	Amphisoleniaceae_X_sp.	Dinoflagellata (Alveolata)
815	0	0	0	0	0	0	40	0	13	0	0	0	0	0	0	Eukaryota	Archaeplastida	Chlorophyta	Mamiellophyceae	Mamiellales	Mamiellaceae	Micromonas	Micromonas_bravo_B1	Flagellated cells
816	0	0	0	0	0	0	0	12	0	0	0	0	0	0	0	Eukaryota	Stramenopiles	Ochrophyta	Bacillariophyta	Bacillariophyta_X	Polar-centric-Mediophyceae	Eunotogramma	Eunotogramma_laevis	Bacillariophyta (Stramenopiles)
817	0	62	0	0	0	0	0	0	0	0	0	0	0	0	0	Eukaryota	Rhizaria	Cercozoa	Filosa-Thecofilosea	Filosa-Thecofilosea_X	Mataza-lineage	Mataza-lineage_X	Mataza-lineage_X_sp.	Flagellated cells
818	0	0	8	32	0	0	0	0	0	0	0	0	0	0	0	Eukaryota	Alveolata	Dinoflagellata	Dinophyceae	Dinophyceae_X	Dinophyceae_XX	Dinophyceae_XXX	Dinophyceae_XXX_sp.	Dinoflagellata (Alveolata)
819	0	21	0	0	0	0	0	0	0	0	0	0	0	0	0	Eukaryota	Alveolata	Dinoflagellata	Dinophyceae	Dinophyceae_X	Dinophyceae_XX	Dinophyceae_XXX	Dinophyceae_XXX_sp.	Dinoflagellata (Alveolata)
820	0	5	16	18	0	0	0	0	0	0	0	0	0	0	0	Eukaryota	Stramenopiles	Ochrophyta	Bacillariophyta	Bacillariophyta_X	Polar-centric-Mediophyceae	Thalassiosira	Thalassiosira_profunda	Bacillariophyta (Stramenopiles)
821	10	123	8	0	0	0	0	0	0	0	0	0	0	0	0	Eukaryota	Alveolata	Dinoflagellata	Dinophyceae	Gymnodiniales	Chytriodiniaceae	Dissodinium	Dissodinium_pseudolunula	Dinoflagellata (Alveolata)
822	0	0	0	0	0	18	0	0	0	0	0	0	0	0	0	Eukaryota	Alveolata	Ciliophora	Spirotrichea	Strombidiida	Strombidiidae_R	Strombidiidae_R_X	Strombidiidae_R_X_sp.	Ciliophora (Alveolata)
823	0	0	34	0	0	0	0	0	0	0	0	0	0	0	0	Eukaryota	Rhizaria	Cercozoa	Filosa-Thecofilosea	Cryomonadida	Cryothecomonas-lineage	Cryothecomonas	Cryothecomonas_aestivalis	Flagellated cells
824	0	0	0	0	0	0	32	0	0	7	2	7	0	0	0	Eukaryota	Rhizaria	Cercozoa	Filosa-Thecofilosea	Ventricleftida	Ventrifissuridae	Ventrifissura	Ventrifissura_foliiformis	Flagellated cells
825	0	0	6	2	0	3	0	0	0	0	0	0	0	0	0	Eukaryota	Stramenopiles	Ochrophyta	Bacillariophyta	Bacillariophyta_X	Polar-centric-Mediophyceae	Chaetoceros	Chaetoceros_pseudocurvisetus	Bacillariophyta (Stramenopiles)
826	0	25	14	79	42	458	0	0	0	0	0	0	0	0	0	Eukaryota	Alveolata	Dinoflagellata	Dinophyceae	Gymnodiniales	Gymnodiniaceae	Gymnodinium	Gymnodinium_sp.	Dinoflagellata (Alveolata)
827	0	0	0	0	0	24	0	0	0	0	0	0	0	0	0	Eukaryota	Alveolata	Dinoflagellata	Dinophyceae	Dinophyceae_X	Dinophyceae_XX	Dinophyceae_XXX	Dinophyceae_XXX_sp.	Dinoflagellata (Alveolata)
828	0	0	0	0	0	0	72	166	0	0	0	0	0	0	0	Eukaryota	Alveolata	Dinoflagellata	Dinophyceae	Gymnodiniales	Kareniaceae	Karlodinium	Karlodinium_veneficum	Dinoflagellata (Alveolata)
830	0	0	0	0	0	0	47	0	0	0	0	0	0	0	0	Eukaryota	Alveolata	Dinoflagellata	Syndiniales	Dino-Group-II	Dino-Group-II-Clade-13	Dino-Group-II-Clade-13_X	Dino-Group-II-Clade-13_X_sp.	Dinoflagellata (Alveolata)
831	0	0	0	0	0	0	10	0	0	0	0	0	0	0	0	Eukaryota	Stramenopiles	Ochrophyta	Dictyochophyceae	Dictyochophyceae_X	Florenciellales	Pseudochattonella	Pseudochattonella_farcimen	Bacillariophyta (Stramenopiles)
832	0	0	8	0	0	0	0	0	0	0	0	0	0	0	0	Eukaryota	Alveolata	Dinoflagellata	Syndiniales	Dino-Group-II	Dino-Group-II-Clade-47	Dino-Group-II-Clade-47_X	Dino-Group-II-Clade-47_X_sp.	Dinoflagellata (Alveolata)
833	3	17	0	0	0	0	0	0	0	0	0	0	0	0	0	Eukaryota	Hacrobia	Picozoa	Picozoa_X	Picozoa_XX	Picozoa_XXX	Picozoa_XXXX	Picozoa_XXXX_sp.	Flagellated cells
835	7	0	0	0	0	0	0	0	0	0	0	0	0	0	0	Eukaryota	Alveolata	Dinoflagellata	Dinophyceae	Dinophyceae_X	Dinophyceae_XX	Dinophyceae_XXX	Dinophyceae_XXX_sp.	Dinoflagellata (Alveolata)
836	0	0	0	0	0	0	0	0	0	10	0	20	0	4	0	Eukaryota	Rhizaria	Cercozoa	Filosa-Thecofilosea	Cryomonadida	Protaspa-lineage	Protaspa	Protaspa_obliqua	Flagellated cells
837	0	0	0	0	0	0	56	0	0	0	0	0	0	0	0	Eukaryota	Alveolata	Dinoflagellata	Dinophyceae	Dinophyceae_X	Oodiniaceae	Oodinium	Oodinium_pouchetii	Dinoflagellata (Alveolata)
838	0	0	0	0	0	0	9	0	0	459	33	14	8	121	177	Eukaryota	Stramenopiles	Ochrophyta	Bacillariophyta	Bacillariophyta_X	Radial-centric-basal-Coscinodiscophyceae	Rhizosolenia	Rhizosolenia_imbricata	Bacillariophyta (Stramenopiles)
839	0	0	0	0	0	0	0	0	0	0	0	0	7	0	0	Eukaryota	Stramenopiles	Ochrophyta	Bacillariophyta	Bacillariophyta_X	Polar-centric-Mediophyceae	Chaetoceros	Chaetoceros_danicus	Bacillariophyta (Stramenopiles)
840	0	0	3	5	0	0	0	0	0	0	0	0	0	0	0	Eukaryota	Rhizaria	Cercozoa	Filosa-Thecofilosea	Cryomonadida	Protaspa-lineage	Protaspa	Protaspa_grandis	Flagellated cells
841	0	0	0	0	0	0	0	12	0	0	0	0	0	0	0	Eukaryota	Stramenopiles	Ochrophyta	Bacillariophyta	Bacillariophyta_X	Polar-centric-Mediophyceae	Chaetoceros	Chaetoceros_pseudocurvisetus	Bacillariophyta (Stramenopiles)
842	0	0	0	0	0	0	0	0	0	15	0	0	0	0	0	Eukaryota	Rhizaria	Cercozoa	Filosa-Thecofilosea	Ebriida	TAGIRI1-lineage	TAGIRI1-lineage_X	TAGIRI1-lineage_X_sp.	Flagellated cells
843	0	0	0	0	0	0	0	0	49	0	30	0	0	0	0	Eukaryota	Rhizaria	Cercozoa	Filosa-Thecofilosea	Cryomonadida	Protaspa-lineage	Protaspa	Protaspa_grandis	Flagellated cells
844	0	17	0	0	0	0	0	0	0	0	0	0	0	0	0	Eukaryota	Stramenopiles	Ochrophyta	Dictyochophyceae	Dictyochophyceae_X	Pedinellales	Apedinella	Apedinella_radians	Bacillariophyta (Stramenopiles)
845	0	0	0	23	0	0	0	0	0	0	0	0	0	0	0	Eukaryota	Alveolata	Dinoflagellata	Dinophyceae	Dinophyceae_X	Dinophyceae_XX	Dinophyceae_XXX	Dinophyceae_XXX_sp.	Dinoflagellata (Alveolata)
846	0	0	0	0	0	0	18	0	0	0	0	0	0	0	0	Eukaryota	Alveolata	Dinoflagellata	Syndiniales	Dino-Group-I	Dino-Group-I-Clade-4	Dino-Group-I-Clade-4_X	Dino-Group-I-Clade-4_X_sp.	Dinoflagellata (Alveolata)
847	0	11	9	29	54	13	0	0	0	0	0	0	0	0	0	Eukaryota	Alveolata	Dinoflagellata	Dinophyceae	Gymnodiniales	Gymnodiniaceae	Gyrodinium	Gyrodinium_fusiforme	Dinoflagellata (Alveolata)
848	0	0	0	0	0	0	51	0	0	0	0	0	0	0	0	Eukaryota	Alveolata	Dinoflagellata	Syndiniales	Dino-Group-II	Dino-Group-II-Clade-6	Dino-Group-II-Clade-6_X	Dino-Group-II-Clade-6_X_sp.	Dinoflagellata (Alveolata)
849	0	0	0	0	0	13	0	0	0	0	0	0	0	0	0	Eukaryota	Alveolata	Ciliophora	Spirotrichea	Choreotrichida	Strombidinopsidae	Strombidinopsis	Strombidinopsis_acuminata	Ciliophora (Alveolata)
850	0	7	0	3	11	0	0	0	0	0	0	0	0	0	0	Eukaryota	Hacrobia	Picozoa	Picozoa_X	Picozoa_XX	Picozoa_XXX	Picozoa_XXXX	Picozoa_XXXX_sp.	Flagellated cells
851	0	0	0	0	0	0	0	16	20	0	16	0	0	0	0	Eukaryota	Alveolata	Ciliophora	Spirotrichea	Tintinnida	TIN_09	Tintinnopsis_09	Tintinnopsis_urnula	Ciliophora (Alveolata)
852	0	0	0	0	0	0	6	257	31	10	169	4	0	0	0	Eukaryota	Stramenopiles	Ochrophyta	Dictyochophyceae	Dictyochophyceae_X	Pedinellales	Pedinellales_X	Pedinellales_X_sp.	Bacillariophyta (Stramenopiles)
853	11850	141	0	0	42	337	0	0	0	0	0	0	0	0	0	Eukaryota	Alveolata	Dinoflagellata	Dinophyceae	Gymnodiniales	Gymnodiniaceae	Gyrodinium	Gyrodinium_spirale	Dinoflagellata (Alveolata)
854	0	0	0	0	0	0	0	0	0	0	0	0	139	0	0	Eukaryota	Alveolata	Dinoflagellata	Syndiniales	Dino-Group-I	Dino-Group-I-Clade-1	Dino-Group-I-Clade-1_X	Dino-Group-I-Clade-1_X_sp.	Dinoflagellata (Alveolata)
856	0	0	0	0	0	0	0	0	10	0	0	0	0	0	0	Eukaryota	Archaeplastida	Rhodophyta	Stylonematophyceae	Porphyridiales-2	Stylonematales-Group-I	Rhodospora	Rhodospora_sordida	Flagellated cells
857	0	0	0	0	0	86	0	0	0	0	0	0	0	0	0	Eukaryota	Alveolata	Dinoflagellata	Syndiniales	Dino-Group-II	Dino-Group-II-Clade-5	Dino-Group-II-Clade-5_X	Dino-Group-II-Clade-5_X_sp.	Dinoflagellata (Alveolata)
858	0	0	16	142	0	0	0	0	0	0	0	0	0	0	0	Eukaryota	Alveolata	Dinoflagellata	Dinophyceae	Suessiales	Suessiaceae	Ansanella	Ansanella_granifera	Dinoflagellata (Alveolata)
859	0	0	0	0	0	0	0	19	5	0	0	0	0	0	0	Eukaryota	Rhizaria	Cercozoa	Filosa-Thecofilosea	Ventricleftida	CCW10-lineage	CCW10-lineage_X	CCW10-lineage_X_sp.	Flagellated cells
860	0	29	0	34	0	30	0	0	0	0	0	0	0	0	0	Eukaryota	Archaeplastida	Chlorophyta	Mamiellophyceae	Mamiellales	Mamiellaceae	Micromonas	Micromonas_bravo_B2	Flagellated cells
861	0	6	0	0	0	0	0	0	0	0	0	0	0	0	0	Eukaryota	Alveolata	Dinoflagellata	Dinophyceae	Peridiniales	Protoperidiniaceae	Protoperidinium	Protoperidinium_monovelum	Dinoflagellata (Alveolata)
862	0	0	0	0	0	0	0	23	0	0	0	0	0	0	0	Eukaryota	Stramenopiles	Ochrophyta	Bacillariophyta	Bacillariophyta_X	Radial-centric-basal-Coscinodiscophyceae	Stephanopyxis	Stephanopyxis_palmeriana	Bacillariophyta (Stramenopiles)
863	0	0	0	0	0	0	0	15	0	0	0	0	0	0	0	Eukaryota	Stramenopiles	Opalozoa	MAST-3	MAST-3A	MAST-3A_X	MAST-3A_XX	MAST-3A_XX_sp.	Bacillariophyta (Stramenopiles)
864	0	0	0	0	0	0	0	0	0	0	0	0	0	13	0	Eukaryota	Rhizaria	Cercozoa	Filosa-Thecofilosea	Cryomonadida	Protaspa-lineage	Protaspa-lineage_X	Protaspa-lineage_X_sp.	Flagellated cells
865	0	0	0	0	0	0	0	0	0	16	0	0	0	0	0	Eukaryota	Rhizaria	Cercozoa	Filosa-Thecofilosea	Ebriida	Botuliformidae	Botuliformidae_X	Botuliformidae_X_sp.	Flagellated cells
866	19	0	0	0	0	105	0	0	0	0	0	0	0	0	0	Eukaryota	Alveolata	Dinoflagellata	Dinophyceae	Gymnodiniales	Kareniaceae	Karlodinium	Karlodinium_veneficum	Dinoflagellata (Alveolata)
867	0	0	0	0	0	0	0	0	29	0	0	0	0	0	0	Eukaryota	Alveolata	Dinoflagellata	Dinophyceae	Peridiniales	Heterocapsaceae	Heterocapsa	Heterocapsa_pygmaea	Dinoflagellata (Alveolata)
868	18	0	0	0	0	0	0	0	0	0	0	0	0	0	0	Eukaryota	Alveolata	Dinoflagellata	Dinophyceae	Dinophyceae_X	Dinophyceae_XX	Dinophyceae_XXX	Dinophyceae_XXX_sp.	Dinoflagellata (Alveolata)
869	0	0	0	0	8	0	0	0	0	0	0	0	0	0	0	Eukaryota	Rhizaria	Cercozoa	Filosa-Thecofilosea	Ebriida	TAGIRI1-lineage	TAGIRI1-lineage_X	TAGIRI1-lineage_X_sp.	Flagellated cells
870	0	0	0	5	0	41	0	0	0	0	0	0	0	0	0	Eukaryota	Alveolata	Ciliophora	Spirotrichea	Choreotrichida	Choreotrichida_X	Choreotrichida_XX	Choreotrichida_XX_sp.	Ciliophora (Alveolata)
871	0	0	0	0	0	0	0	0	0	0	28	0	0	14	2	Eukaryota	Alveolata	Ciliophora	Spirotrichea	Strombidiida	Strombidiidae_K	Strombidium_K	Strombidium_capitatum	Ciliophora (Alveolata)
872	0	0	0	0	0	0	0	0	0	32	0	0	0	0	0	Eukaryota	Rhizaria	Cercozoa	Filosa-Thecofilosea	Filosa-Thecofilosea_X	Mataza-lineage	Mataza-lineage_X	Mataza-lineage_X_sp.	Flagellated cells
873	0	0	0	0	0	0	4	0	0	0	0	0	0	2	4509	Eukaryota	Stramenopiles	Ochrophyta	Bacillariophyta	Bacillariophyta_X	Radial-centric-basal-Coscinodiscophyceae	Leptocylindrus	Leptocylindrus_sp.	Bacillariophyta (Stramenopiles)
874	0	0	0	0	0	0	0	0	0	0	7	0	0	0	0	Eukaryota	Rhizaria	Cercozoa	Filosa-Imbricatea	Euglyphida	Paulinellidae	Paulinella	Paulinella_chromatophora	Flagellated cells
875	0	0	0	0	0	0	0	0	0	0	0	0	0	19	0	Eukaryota	Rhizaria	Cercozoa	Endomyxa	Vampyrellida	Sey055-lineage	Sey055-lineage_X	Sey055-lineage_X_sp.	Flagellated cells
876	0	0	0	276	31	85	0	0	0	0	0	0	0	0	0	Eukaryota	Stramenopiles	Ochrophyta	Bacillariophyta	Bacillariophyta_X	Radial-centric-basal-Coscinodiscophyceae	Stephanopyxis	Stephanopyxis_turris	Bacillariophyta (Stramenopiles)
877	0	0	0	0	0	0	0	0	0	0	7	0	0	0	0	Eukaryota	Alveolata	Ciliophora	Litostomatea	Litostomatea_X	Litostomatea_XX	Litostomatea_XXX	Litostomatea_XXX_sp.	Ciliophora (Alveolata)
878	0	262	72	57	76	117	0	0	0	0	0	0	0	0	0	Eukaryota	Stramenopiles	Ochrophyta	Bacillariophyta	Bacillariophyta_X	Polar-centric-Mediophyceae	Chaetoceros	Chaetoceros_socialis_debilis	Bacillariophyta (Stramenopiles)
879	0	0	0	0	0	0	57	0	0	0	0	0	0	0	0	Eukaryota	Hacrobia	Haptophyta	Prymnesiophyceae	Prymnesiales	Chrysochromulinaceae	Chrysochromulina	Chrysochromulina_sp.	Flagellated cells
880	0	0	0	0	0	0	0	47	0	0	8	0	0	0	0	Eukaryota	Hacrobia	Cryptophyta	Cryptophyceae	Goniomonadales	Goniomonadales_X	Goniomonas	Goniomonas_amphinema	Flagellated cells
881	0	4	0	4	2	8	0	0	0	0	0	0	0	0	0	Eukaryota	Hacrobia	Picozoa	Picozoa_X	Picozoa_XX	Picozoa_XXX	Picozoa_XXXX	Picozoa_XXXX_sp.	Flagellated cells
882	0	0	0	0	0	0	0	0	0	0	0	0	0	9	0	Eukaryota	Rhizaria	Cercozoa	Filosa-Imbricatea	Thaumatomonadida	Thaumatomonadidae	Thaumatomonas	Thaumatomonas_vancouveri	Flagellated cells
885	0	0	0	0	0	0	7	0	0	0	0	0	0	0	0	Eukaryota	Hacrobia	Picozoa	Picozoa_X	Picozoa_XX	Picozoa_XXX	Picozoa_XXXX	Picozoa_XXXX_sp.	Flagellated cells
886	0	0	0	0	0	0	0	0	0	0	0	80	9	0	63	Eukaryota	Alveolata	Dinoflagellata	Dinophyceae	Gymnodiniales	Chytriodiniaceae	Dissodinium	Dissodinium_pseudolunula	Dinoflagellata (Alveolata)
888	0	0	10	0	0	0	0	0	0	0	0	0	0	0	0	Eukaryota	Alveolata	Dinoflagellata	Dinophyceae	Gymnodiniales	Gymnodiniaceae	Gyrodinium	Gyrodinium_sp.	Dinoflagellata (Alveolata)
889	0	0	0	0	0	0	0	0	0	18	0	0	0	0	21	Eukaryota	Alveolata	Dinoflagellata	Dinophyceae	Gymnodiniales	Gymnodiniaceae	Gyrodinium	Gyrodinium_fusiforme	Dinoflagellata (Alveolata)
890	0	0	0	0	0	0	62	0	25	0	0	0	0	0	0	Eukaryota	Archaeplastida	Chlorophyta	Mamiellophyceae	Mamiellales	Mamiellaceae	Micromonas	Micromonas_bravo_B2	Flagellated cells
891	35	0	0	0	0	0	0	0	0	0	0	0	0	0	0	Eukaryota	Alveolata	Dinoflagellata	Dinophyceae	Gymnodiniales	Gymnodiniaceae	Gyrodinium	Gyrodinium_fusiforme	Dinoflagellata (Alveolata)
892	14	11	0	0	38	116	0	0	0	0	0	0	0	0	0	Eukaryota	Stramenopiles	Ochrophyta	Bacillariophyta	Bacillariophyta_X	Radial-centric-basal-Coscinodiscophyceae	Rhizosolenia	Rhizosolenia_imbricata	Bacillariophyta (Stramenopiles)
893	0	0	0	0	0	0	11	0	0	0	0	0	0	0	0	Eukaryota	Rhizaria	Cercozoa	Filosa-Imbricatea	Filosa-Imbricatea_X	Novel-clade-2	Novel-clade-2_X	Novel-clade-2_X_sp.	Flagellated cells
894	0	0	0	0	0	0	0	0	4	13	0	0	0	0	0	Eukaryota	Rhizaria	Cercozoa	Filosa-Thecofilosea	Cryomonadida	Protaspa-lineage	Protaspa-lineage_X	Protaspa-lineage_X_sp.	Flagellated cells
895	0	0	0	0	0	0	0	0	13	0	0	0	0	0	0	Eukaryota	Stramenopiles	Ochrophyta	Bacillariophyta	Bacillariophyta_X	Raphid-pennate	Raphid-pennate_X	Raphid-pennate_X_sp.	Bacillariophyta (Stramenopiles)
896	0	0	0	0	0	0	7	0	0	0	0	0	0	0	0	Eukaryota	Hacrobia	Picozoa	Picozoa_X	Picozoa_XX	Picozoa_XXX	Picozoa_XXXX	Picozoa_XXXX_sp.	Flagellated cells
897	0	0	0	0	0	0	2	13	30	0	0	0	0	0	0	Eukaryota	Archaeplastida	Rhodophyta	Compsopogonophyceae	Erythropeltidales	Erythropeltidales_X	Madagascaria	Madagascaria_erythrocladioides	Flagellated cells
898	0	0	0	0	0	0	0	9	0	0	0	0	0	0	0	Eukaryota	Alveolata	Dinoflagellata	Dinophyceae	Dinophysiales	Oxyphysiaceae	Phalachroma	Phalacroma_rotundatum	Dinoflagellata (Alveolata)
899	0	0	0	0	0	0	54	0	0	0	0	0	0	0	0	Eukaryota	Hacrobia	Haptophyta	Prymnesiophyceae	Prymnesiales	Chrysochromulinaceae	Chrysochromulina	Chrysochromulina_sp.	Flagellated cells
900	0	0	0	0	0	0	0	27	0	0	0	0	0	0	0	Eukaryota	Apusozoa	Apusomonadidae	Apusomonadidae_Group-1	Apusomonadidae_Group-1_X	Apusomonadidae_Group-1_XX	Amastigomonas	Amastigomonas_mutabilis	Flagellated cells
901	0	0	0	0	0	0	304	72	224	0	6	0	0	0	0	Eukaryota	Archaeplastida	Chlorophyta	Mamiellophyceae	Mamiellales	Mamiellaceae	Micromonas	Micromonas_commoda_A2	Flagellated cells
903	0	0	0	0	0	0	0	0	0	7	0	0	8	0	0	Eukaryota	Rhizaria	Cercozoa	Filosa-Thecofilosea	Cryomonadida	Protaspa-lineage	Protaspa	Protaspa_grandis	Flagellated cells
904	0	0	0	9	12	66	0	0	0	0	0	0	0	0	0	Eukaryota	Alveolata	Dinoflagellata	Dinophyceae	Dinophyceae_X	Dinophyceae_XX	Dinophyceae_XXX	Dinophyceae_XXX_sp.	Dinoflagellata (Alveolata)
905	0	48	44	0	0	0	0	0	0	0	0	0	0	0	0	Eukaryota	Alveolata	Dinoflagellata	Dinophyceae	Gymnodiniales	Gymnodiniaceae	Gyrodinium	Gyrodinium_fusiforme	Dinoflagellata (Alveolata)
907	0	0	0	0	0	0	0	79	0	0	0	0	0	0	0	Eukaryota	Alveolata	Dinoflagellata	Dinophyceae	Peridiniales	Thoracosphaeraceae	Pentapharsodinium	Pentapharsodinium_tyrrhenicum	Dinoflagellata (Alveolata)
908	0	0	0	0	0	0	0	8	8	0	0	0	0	0	0	Eukaryota	Rhizaria	Cercozoa	Filosa-Imbricatea	Thaumatomonadida	Peregriniidae	Peregrinia	Peregrinia_sp.	Flagellated cells
909	0	0	0	0	0	158	0	0	0	0	0	0	0	0	0	Eukaryota	Stramenopiles	Ochrophyta	Dictyochophyceae	Dictyochophyceae_X	Pedinellales	Pedinellales_X	Pedinellales_X_sp.	Bacillariophyta (Stramenopiles)
910	0	11	0	0	0	0	0	0	0	0	0	0	0	0	0	Eukaryota	Alveolata	Dinoflagellata	Syndiniales	Dino-Group-I	Dino-Group-I-Clade-4	Dino-Group-I-Clade-4_X	Dino-Group-I-Clade-4_X_sp.	Dinoflagellata (Alveolata)
911	0	0	0	0	0	0	616	231	1561	40	86	224	0	89	0	Eukaryota	Stramenopiles	Ochrophyta	Bacillariophyta	Bacillariophyta_X	Polar-centric-Mediophyceae	Minidiscus	Minidiscus_trioculatus	Bacillariophyta (Stramenopiles)
912	0	186	32	0	0	0	0	0	0	0	0	0	0	0	0	Eukaryota	Alveolata	Dinoflagellata	Dinophyceae	Peridiniales	Thoracosphaeraceae	Scrippsiella	Scrippsiella_precaria	Dinoflagellata (Alveolata)
913	0	0	9	4	0	0	0	0	0	0	0	0	0	0	0	Eukaryota	Rhizaria	Cercozoa	Filosa-Thecofilosea	Filosa-Thecofilosea_X	Mataza-lineage	Mataza	Mataza_hastifera	Flagellated cells
914	199	144	51	88	35	16	0	0	0	0	0	0	0	0	0	Eukaryota	Opisthokonta	Mesomycetozoa	Ichthyosporea	Ichthyosphonida	Pseudoperkinsidae	Pseudoperkinsus	Pseudoperkinsus_tapetis	Flagellated cells
916	0	0	0	0	0	0	0	11	18	0	0	0	0	0	0	Eukaryota	Stramenopiles	Ochrophyta	Bacillariophyta	Bacillariophyta_X	Radial-centric-basal-Coscinodiscophyceae	Paralia	Paralia_longispina	Bacillariophyta (Stramenopiles)
917	0	0	0	0	0	7	0	0	0	0	0	0	0	0	0	Eukaryota	Rhizaria	Cercozoa	Filosa-Thecofilosea	Ebriida	TAGIRI1-lineage	TAGIRI1-lineage_X	TAGIRI1-lineage_X_sp.	Flagellated cells
920	0	0	0	0	0	0	0	0	0	0	150	4	0	59	773	Eukaryota	Alveolata	Dinoflagellata	Noctilucophyceae	Noctilucales	Noctilucaceae	Noctiluca	Noctiluca_scintillans	Dinoflagellata (Alveolata)
921	0	0	0	0	0	0	0	0	0	12	0	0	0	0	0	Eukaryota	Alveolata	Dinoflagellata	Dinophyceae	Dinophyceae_X	Dinophyceae_XX	Dinophyceae_XXX	Dinophyceae_XXX_sp.	Dinoflagellata (Alveolata)
922	0	0	0	0	0	0	0	51	2	0	0	0	0	0	0	Eukaryota	Rhizaria	Cercozoa	Filosa-Thecofilosea	Ebriida	TAGIRI1-lineage	TAGIRI1-lineage_X	TAGIRI1-lineage_X_sp.	Flagellated cells
923	0	0	0	0	0	0	0	0	0	0	0	0	0	168	0	Eukaryota	Rhizaria	Cercozoa	Filosa-Thecofilosea	Ebriida	TAGIRI1-lineage	TAGIRI1-lineage_X	TAGIRI1-lineage_X_sp.	Flagellated cells
924	0	0	0	0	0	0	23	93	99	11	74	96	2	2	0	Eukaryota	Stramenopiles	Ochrophyta	Bacillariophyta	Bacillariophyta_X	Polar-centric-Mediophyceae	Chaetoceros	Chaetoceros_socialis_debilis	Bacillariophyta (Stramenopiles)
925	0	0	0	0	0	0	0	0	0	0	0	0	4	4	0	Eukaryota	Rhizaria	Cercozoa	Filosa-Thecofilosea	Filosa-Thecofilosea_X	Novel-Clade-4	Novel-Clade-4_X	Novel-Clade-4_X_sp.	Flagellated cells
926	0	0	0	0	7	0	0	0	0	0	0	0	0	0	0	Eukaryota	Alveolata	Dinoflagellata	Syndiniales	Dino-Group-II	Dino-Group-II-Clade-16	Dino-Group-II-Clade-16_X	Dino-Group-II-Clade-16_X_sp.	Dinoflagellata (Alveolata)
927	7	0	0	0	0	0	0	0	0	0	0	0	0	0	0	Eukaryota	Alveolata	Dinoflagellata	Syndiniales	Dino-Group-I	Dino-Group-I-Clade-4	Dino-Group-I-Clade-4_X	Dino-Group-I-Clade-4_X_sp.	Dinoflagellata (Alveolata)
929	0	49	0	0	0	3	0	0	0	0	0	0	0	0	0	Eukaryota	Alveolata	Dinoflagellata	Dinophyceae	Gymnodiniales	Gymnodiniaceae	Gymnodinium	Gymnodinium_sp.	Dinoflagellata (Alveolata)
930	0	0	0	0	0	0	0	0	0	32	0	0	0	0	0	Eukaryota	Alveolata	Dinoflagellata	Dinophyceae	Gymnodiniales	Gymnodiniaceae	Gyrodinium	Gyrodinium_fusiforme	Dinoflagellata (Alveolata)
931	0	0	0	12	0	0	0	0	0	0	0	0	0	0	0	Eukaryota	Alveolata	Dinoflagellata	Syndiniales	Dino-Group-II	Dino-Group-II-Clade-1	Dino-Group-II-Clade-1_X	Dino-Group-II-Clade-1_X_sp.	Dinoflagellata (Alveolata)
933	0	0	0	0	0	0	52	31	0	176	198	0	381	0	0	Eukaryota	Hacrobia	Haptophyta	Prymnesiophyceae	Phaeocystales	Phaeocystaceae	Phaeocystis	Phaeocystis_globosa	Flagellated cells
934	0	0	0	0	0	107	0	0	0	0	0	0	0	0	0	Eukaryota	Stramenopiles	Ochrophyta	Bacillariophyta	Bacillariophyta_X	Polar-centric-Mediophyceae	Chaetoceros	Chaetoceros_sporotruncatus	Bacillariophyta (Stramenopiles)
935	0	0	0	0	0	8	0	0	0	0	0	0	0	0	0	Eukaryota	Rhizaria	Cercozoa	Filosa-Thecofilosea	Filosa-Thecofilosea_X	Novel-Clade-4	Novel-Clade-4_X	Novel-Clade-4_X_sp.	Flagellated cells
936	0	41	0	0	0	0	0	0	0	0	0	0	0	0	0	Eukaryota	Alveolata	Dinoflagellata	Dinophyceae	Dinophyceae_X	Dinophyceae_XX	Dinophyceae_XXX	Dinophyceae_XXX_sp.	Dinoflagellata (Alveolata)
937	0	0	0	0	9	0	0	0	0	0	0	0	0	0	0	Eukaryota	Rhizaria	Cercozoa	Filosa-Thecofilosea	Ebriida	TAGIRI1-lineage	TAGIRI1-lineage_X	TAGIRI1-lineage_X_sp.	Flagellated cells
938	0	0	0	0	0	0	5	0	0	0	0	0	0	0	0	Eukaryota	Hacrobia	Picozoa	Picozoa_X	Picozoa_XX	Picozoa_XXX	Picozoa_XXXX	Picozoa_XXXX_sp.	Flagellated cells
939	41	4	0	17	0	0	0	0	0	0	0	0	0	0	0	Eukaryota	Alveolata	Apicomplexa	Gregarinomorphea	Gregarines	Gregarines_X	Selenidium1	Selenidium1_serpulae	Flagellated cells
940	0	14	6	6	18	6	0	0	0	0	0	0	0	0	0	Eukaryota	Alveolata	Dinoflagellata	Dinophyceae	Peridiniales	Thoracosphaeraceae	Thoracosphaeraceae_X	Thoracosphaeraceae_X_sp.	Dinoflagellata (Alveolata)
941	0	0	0	0	0	0	8	12	12	0	4	1	0	0	0	Eukaryota	Stramenopiles	Ochrophyta	Bacillariophyta	Bacillariophyta_X	Polar-centric-Mediophyceae	Thalassiosira	Thalassiosira_allenii	Bacillariophyta (Stramenopiles)
943	0	0	0	0	0	0	0	0	4	0	16	0	11	11	0	Eukaryota	Stramenopiles	Ochrophyta	Dictyochophyceae	Dictyochophyceae_X	Pedinellales	Pedinellales_X	Pedinellales_X_sp.	Bacillariophyta (Stramenopiles)
944	0	0	0	0	0	0	110	0	0	0	0	0	0	0	0	Eukaryota	Alveolata	Dinoflagellata	Dinophyceae	Gymnodiniales	Gymnodiniaceae	Gyrodinium	Gyrodinium_fusiforme	Dinoflagellata (Alveolata)
946	0	0	16	158	61	31	0	0	0	0	0	0	0	0	0	Eukaryota	Stramenopiles	Ochrophyta	Bacillariophyta	Bacillariophyta_X	Raphid-pennate	Pleurosigma	Pleurosigma_sp.	Bacillariophyta (Stramenopiles)
947	0	0	0	0	0	0	12	0	0	0	0	0	0	0	0	Eukaryota	Alveolata	Dinoflagellata	Syndiniales	Dino-Group-IV	Dino-Group-IV-Syndinium-Group	Syndinium	Syndinium_sp.	Dinoflagellata (Alveolata)
949	0	0	0	0	0	0	0	0	22	7323	276	2357	0	0	6090	Eukaryota	Alveolata	Dinoflagellata	Dinophyceae	Gymnodiniales	Gymnodiniaceae	Gyrodinium	Gyrodinium_spirale	Dinoflagellata (Alveolata)
950	0	0	0	0	0	0	21	0	0	0	0	0	0	0	0	Eukaryota	Alveolata	Dinoflagellata	Syndiniales	Dino-Group-II	Dino-Group-II-Clade-10-and-11	Dino-Group-II-Clade-10-and-11_X	Dino-Group-II-Clade-10-and-11_X_sp.	Dinoflagellata (Alveolata)
951	0	0	0	0	0	0	0	0	7	0	0	0	0	0	0	Eukaryota	Rhizaria	Cercozoa	Filosa-Imbricatea	Thaumatomonadida	Thaumatomonadidae	Thaumatomastix	Thaumatomastix_sp.	Flagellated cells
952	0	0	0	5	3	3	0	0	0	0	0	0	0	0	0	Eukaryota	Alveolata	Ciliophora	Nassophorea	Nassophorea_X	Discotrichidae	NASSO_1	NASSO_1_sp.	Ciliophora (Alveolata)
953	0	0	0	0	0	0	0	36	0	0	0	0	0	0	0	Eukaryota	Hacrobia	Haptophyta	Prymnesiophyceae	Prymnesiales	Prymnesiaceae	Haptolina	Haptolina_sp.	Flagellated cells
954	0	0	0	0	0	0	15	0	0	0	0	0	0	0	0	Eukaryota	Alveolata	Ciliophora	Spirotrichea	Choreotrichida	Leegaardiellidae_B	Leegaardiella	Leegaardiella_sp.	Ciliophora (Alveolata)
955	0	0	0	14	0	0	0	0	0	0	0	0	0	0	0	Eukaryota	Rhizaria	Cercozoa	Filosa	Filosa_X	Filosa_XX	Discomonas	Discomonas_retusa	Flagellated cells
956	28	0	4	0	0	0	0	0	0	0	0	0	0	0	0	Eukaryota	Rhizaria	Cercozoa	Filosa-Thecofilosea	Cryomonadida	Protaspa-lineage	Protaspa-lineage_X	Protaspa-lineage_X_sp.	Flagellated cells
957	0	0	0	0	0	0	28	122	32	20	6	0	0	73	0	Eukaryota	Stramenopiles	Opalozoa	MAST-3	MAST-3F	MAST-3F_X	MAST-3F_XX	MAST-3F_XX_sp.	Bacillariophyta (Stramenopiles)
958	0	0	0	0	0	0	0	0	0	0	0	0	4	0	0	Eukaryota	Rhizaria	Cercozoa	Filosa-Imbricatea	Thaumatomonadida	Thaumatomonadidae	Thaumatomastix	Thaumatomastix_salina	Flagellated cells
959	0	0	0	6	5	0	0	0	0	0	0	0	0	0	0	Eukaryota	Alveolata	Dinoflagellata	Syndiniales	Dino-Group-II	Dino-Group-II-Clade-23	Dino-Group-II-Clade-23_X	Dino-Group-II-Clade-23_X_sp.	Dinoflagellata (Alveolata)
960	0	0	0	0	0	0	10	63	92	0	19	0	0	0	0	Eukaryota	Hacrobia	Cryptophyta	Cryptophyceae	Cryptomonadales	Cryptomonadales_X	Cryptomonadales_XX	Cryptomonadales_XX_sp.	Flagellated cells
961	0	0	0	0	15	6	0	0	0	0	0	0	0	0	0	Eukaryota	Alveolata	Dinoflagellata	Dinophyceae	Peridiniales	Protoperidiniaceae	Protoperidinium	Protoperidinium_claudicans	Dinoflagellata (Alveolata)
962	0	0	0	0	0	0	9	0	0	0	0	0	0	0	0	Eukaryota	Hacrobia	Picozoa	Picozoa_X	Picozoa_XX	Picozoa_XXX	Picozoa_XXXX	Picozoa_XXXX_sp.	Flagellated cells
964	0	0	0	0	0	0	0	4	0	0	6	0	17	14	0	Eukaryota	Hacrobia	Telonemia	Telonemia_X	Telonemia_XX	Telonemia-Group-1	Telonema-Group-1	Telonema_subtile	Flagellated cells
965	0	0	0	0	0	8	0	0	0	0	0	0	0	0	0	Eukaryota	Stramenopiles	Ochrophyta	Bacillariophyta	Bacillariophyta_X	Radial-centric-basal-Coscinodiscophyceae	Proboscia	Proboscia_alata	Bacillariophyta (Stramenopiles)
967	0	0	0	0	0	0	10	0	0	0	0	0	0	0	0	Eukaryota	Hacrobia	Haptophyta	Prymnesiophyceae	Prymnesiales	Chrysochromulinaceae	Chrysochromulina	Chrysochromulina_sp.	Flagellated cells
969	0	0	0	0	0	0	0	8	0	0	10	0	0	0	0	Eukaryota	Hacrobia	Telonemia	Telonemia_X	Telonemia_XX	Telonemia-Group-1	Telonema-Group-1	Telonema_subtile	Flagellated cells
970	0	0	0	0	0	0	23	0	0	0	0	0	0	0	0	Eukaryota	Alveolata	Dinoflagellata	Dinophyceae	Prorocentrales	Prorocentraceae	Prorocentrum	Prorocentrum_sp.	Dinoflagellata (Alveolata)
972	0	0	0	0	5	25	0	0	0	0	0	0	0	0	0	Eukaryota	Alveolata	Dinoflagellata	Syndiniales	Dino-Group-II	Dino-Group-II-Clade-22	Dino-Group-II-Clade-22_X	Dino-Group-II-Clade-22_X_sp.	Dinoflagellata (Alveolata)
973	0	0	0	0	0	0	0	0	0	0	0	27	0	7	0	Eukaryota	Archaeplastida	Streptophyta	Embryophyceae	Embryophyceae_X	Embryophyceae_XX	Solanum	Solanum_lycopersicum	Flagellated cells
974	0	0	0	0	0	0	6	0	0	0	0	0	0	0	0	Eukaryota	Rhizaria	Cercozoa	Filosa-Thecofilosea	Filosa-Thecofilosea_X	Novel-Clade-4	Novel-Clade-4_X	Novel-Clade-4_X_sp.	Flagellated cells
975	0	0	0	0	0	0	26	6	0	193	20	33	1	19	0	Eukaryota	Opisthokonta	Mesomycetozoa	Ichthyosporea	Ichthyosphonida	Pseudoperkinsidae	Pseudoperkinsus	Pseudoperkinsus_tapetis	Flagellated cells
976	0	0	0	41	0	0	0	0	0	0	0	0	0	0	0	Eukaryota	Alveolata	Dinoflagellata	Dinophyceae	Suessiales	Suessiales_X	Suessiales_XX	Suessiales_XX_sp.	Dinoflagellata (Alveolata)
977	0	0	0	0	0	0	0	0	0	0	0	0	7	3	0	Eukaryota	Stramenopiles	Ochrophyta	Dictyochophyceae	Dictyochophyceae_X	Pedinellales	Pedinellales_X	Pedinellales_X_sp.	Bacillariophyta (Stramenopiles)
978	0	0	0	22	4	50	0	0	0	0	0	0	0	0	0	Eukaryota	Archaeplastida	Chlorophyta	Mamiellophyceae	Mamiellales	Mamiellaceae	Micromonas	Micromonas_commoda_A2	Flagellated cells
979	0	0	0	0	0	0	0	9	0	0	0	0	0	0	0	Eukaryota	Alveolata	Ciliophora	Oligohymenophorea	Scuticociliatia_1	Thigmophryidae	Myxophyllum	Myxophyllum_sp.	Ciliophora (Alveolata)
980	0	0	0	0	0	0	0	0	0	0	0	23	33	0	0	Eukaryota	Apusozoa	Hilomonadea	Planomonadida	Planomonadidae	Planomonadidae_Group-1	Ancyromonas	Ancyromonas_indica	Flagellated cells
981	0	0	0	0	0	0	12	0	0	0	0	0	0	0	0	Eukaryota	Rhizaria	Cercozoa	Filosa-Imbricatea	Filosa-Imbricatea_X	Novel-clade-2	Novel-clade-2_X	Novel-clade-2_X_sp.	Flagellated cells
982	0	0	0	0	0	0	0	0	0	0	0	0	2	0	9	Eukaryota	Rhizaria	Cercozoa	Filosa-Imbricatea	Thaumatomonadida	Thaumatomonadida_X	Thaumatomonadida_XX	Thaumatomonadida_XX_sp.	Flagellated cells
984	0	0	0	0	0	0	0	0	0	0	15	0	0	0	0	Eukaryota	Opisthokonta	Mesomycetozoa	Ichthyosporea	Ichthyosphonida	Pseudoperkinsidae	Sphaeroforma	Sphaeroforma_sp.	Flagellated cells
985	0	0	0	0	0	0	27	82	55	0	77	0	0	0	0	Eukaryota	Hacrobia	Telonemia	Telonemia_X	Telonemia_XX	Telonemia-Group-1	Telonemia-Group-1_X	Telonemia-Group-1_X_sp.	Flagellated cells
987	0	0	0	1	0	6	0	0	0	0	0	0	0	0	0	Eukaryota	Stramenopiles	Ochrophyta	Bacillariophyta	Bacillariophyta_X	Polar-centric-Mediophyceae	Extubocellulus	Extubocellulus_spinifer	Bacillariophyta (Stramenopiles)
990	0	0	0	0	0	0	0	122	0	0	23	0	0	0	0	Eukaryota	Hacrobia	Telonemia	Telonemia_X	Telonemia_XX	Telonemia-Group-1	Telonemia-Group-1_X	Telonemia-Group-1_X_sp.	Flagellated cells
991	0	0	0	0	0	0	0	10	0	0	0	0	0	0	0	Eukaryota	Alveolata	Dinoflagellata	Syndiniales	Dino-Group-II	Dino-Group-II-Clade-10-and-11	Dino-Group-II-Clade-10-and-11_X	Dino-Group-II-Clade-10-and-11_X_sp.	Dinoflagellata (Alveolata)
992	0	0	0	0	0	0	0	0	0	0	0	4	0	8	0	Eukaryota	Rhizaria	Cercozoa	Filosa-Thecofilosea	Cryomonadida	Protaspa-lineage	Protaspa-lineage_X	Protaspa-lineage_X_sp.	Flagellated cells
993	0	0	0	0	7	15	0	0	0	0	0	0	0	0	0	Eukaryota	Alveolata	Dinoflagellata	Syndiniales	Dino-Group-II	Dino-Group-II-Clade-22	Dino-Group-II-Clade-22_X	Dino-Group-II-Clade-22_X_sp.	Dinoflagellata (Alveolata)
994	0	0	0	0	0	6	0	0	0	0	0	0	0	0	0	Eukaryota	Alveolata	Dinoflagellata	Syndiniales	Dino-Group-II	Dino-Group-II_X	Dino-Group-II_XX	Dino-Group-II_XX_sp.	Dinoflagellata (Alveolata)
995	0	0	0	0	0	8	0	0	0	0	0	0	0	0	0	Eukaryota	Stramenopiles	Ochrophyta	Bacillariophyta	Bacillariophyta_X	Radial-centric-basal-Coscinodiscophyceae	Coscinodiscus	Coscinodiscus_sp.	Bacillariophyta (Stramenopiles)
996	0	0	0	0	0	0	0	193	11	0	41	0	0	0	0	Eukaryota	Rhizaria	Cercozoa	Filosa-Thecofilosea	Ventricleftida	CCW10-lineage	CCW10-lineage_X	CCW10-lineage_X_sp.	Flagellated cells
998	0	0	0	0	0	10	0	0	0	0	0	0	0	0	0	Eukaryota	Stramenopiles	Ochrophyta	Bacillariophyta	Bacillariophyta_X	Polar-centric-Mediophyceae	Thalassiosira	Thalassiosira_allenii	Bacillariophyta (Stramenopiles)
999	0	0	0	0	0	0	0	7	3	0	7	0	0	0	0	Eukaryota	Rhizaria	Cercozoa	Endomyxa	Vampyrellida	Sey055-lineage	Sey055-lineage_X	Sey055-lineage_X_sp.	Flagellated cells
1000	0	0	0	0	0	0	125	11	50	0	0	0	0	0	0	Eukaryota	Archaeplastida	Chlorophyta	Mamiellophyceae	Mamiellales	Mamiellaceae	Micromonas	Micromonas_pusilla	Flagellated cells
1001	0	0	0	0	0	23	0	0	0	0	0	0	0	0	0	Eukaryota	Alveolata	Dinoflagellata	Dinophyceae	Dinophyceae_X	Dinophyceae_XX	Dinophyceae_XXX	Dinophyceae_XXX_sp.	Dinoflagellata (Alveolata)
1002	0	0	0	0	0	0	70	1	0	0	0	0	0	0	0	Eukaryota	Archaeplastida	Chlorophyta	Chloropicophyceae	Chloropicales	Chloropicaceae	Chloropicon	Chloropicon_roscoffensis	Flagellated cells
1003	0	3	18	0	0	0	0	0	0	0	0	0	0	0	0	Eukaryota	Stramenopiles	Ochrophyta	Bacillariophyta	Bacillariophyta_X	Polar-centric-Mediophyceae	Chaetoceros	Chaetoceros_decipiens	Bacillariophyta (Stramenopiles)
1004	0	0	0	0	0	0	0	0	0	0	11	0	0	0	0	Eukaryota	Alveolata	Apicomplexa	Gregarinomorphea	Gregarines	Gregarines_X	Selenidium1	Selenidium1_sp.	Flagellated cells
1005	0	0	0	0	371	16	0	0	0	0	0	0	0	0	0	Eukaryota	Stramenopiles	Ochrophyta	Bacillariophyta	Bacillariophyta_X	Radial-centric-basal-Coscinodiscophyceae	Actinocyclus	Actinocyclus_curvatulus	Bacillariophyta (Stramenopiles)
1006	0	0	0	0	0	0	0	0	0	0	0	0	0	21	0	Eukaryota	Rhizaria	Cercozoa	Filosa-Thecofilosea	Ebriida	Botuliformidae	Botuliformidae_X	Botuliformidae_X_sp.	Flagellated cells
1007	0	2897	45	2	312	222	0	0	0	0	0	0	0	0	0	Eukaryota	Alveolata	Dinoflagellata	Dinophyceae	Gonyaulacales	Ceratiaceae	Tripos	Tripos_fusus	Dinoflagellata (Alveolata)
1009	0	0	0	0	0	20	0	0	0	0	0	0	0	0	0	Eukaryota	Hacrobia	Telonemia	Telonemia_X	Telonemia_XX	Telonemia-Group-1	Telonemia-Group-1_X	Telonemia-Group-1_X_sp.	Flagellated cells
1010	0	0	0	0	0	0	3	0	0	0	7	0	3	0	0	Eukaryota	Opisthokonta	Choanoflagellida	Choanoflagellatea	Acanthoecida	Stephanoecidae_New_Choanos_8	Stephanoecidae_New_Choanos_8_X	Stephanoecidae_New_Choanos_8_X_sp.	Flagellated cells
1012	0	0	0	0	0	0	0	0	14	0	0	0	0	0	0	Eukaryota	Alveolata	Dinoflagellata	Dinophyceae	Suessiales	Suessiaceae	Pelagodinium	Pelagodinium_sp.	Dinoflagellata (Alveolata)
1013	0	0	0	0	0	0	10	20	77	36	11	0	0	7	0	Eukaryota	Stramenopiles	Ochrophyta	Bacillariophyta	Bacillariophyta_X	Polar-centric-Mediophyceae	Thalassiosira	Thalassiosira_curviseriata	Bacillariophyta (Stramenopiles)
1015	0	0	0	0	0	0	0	0	0	24	0	0	0	0	25	Eukaryota	Alveolata	Dinoflagellata	Dinophyceae	Gymnodiniales	Gymnodiniaceae	Gyrodinium	Gyrodinium_fusiforme	Dinoflagellata (Alveolata)
1016	0	0	0	0	0	0	14	0	0	0	0	0	0	0	0	Eukaryota	Alveolata	Ciliophora	Nassophorea	Nassophorea_X	Discotrichidae	NASSO_1	NASSO_1_sp.	Ciliophora (Alveolata)
1017	0	0	0	0	0	0	0	0	0	0	4	0	0	0	0	Eukaryota	Alveolata	Dinoflagellata	Syndiniales	Dino-Group-II	Dino-Group-II_X	Dino-Group-II_XX	Dino-Group-II_XX_sp.	Dinoflagellata (Alveolata)
1018	0	0	0	0	0	0	0	66	0	0	12	0	0	0	0	Eukaryota	Rhizaria	Cercozoa	Filosa-Imbricatea	Filosa-Imbricatea_X	Novel-clade-2	Novel-clade-2_X	Novel-clade-2_X_sp.	Flagellated cells
1019	0	60	0	0	0	0	0	0	0	0	0	0	0	0	0	Eukaryota	Alveolata	Dinoflagellata	Dinophyceae	Dinophyceae_X	Dinophyceae_XX	Dinophyceae_XXX	Dinophyceae_XXX_sp.	Dinoflagellata (Alveolata)
1020	0	0	0	0	0	35	0	0	0	0	0	0	0	0	0	Eukaryota	Alveolata	Ciliophora	Spirotrichea	Strombidiida_B	Strombidiida_B_X	Strombidiida_B_XX	Strombidiida_B_XX_sp.	Ciliophora (Alveolata)
1021	0	0	0	0	0	0	0	0	0	47	0	0	0	0	0	Eukaryota	Rhizaria	Cercozoa	Filosa-Thecofilosea	Ventricleftida	Ventricleftida_X	Ventricleftida_XX	Ventricleftida_XX_sp.	Flagellated cells
1022	0	0	0	0	0	0	6	0	0	0	0	0	0	0	0	Eukaryota	Alveolata	Dinoflagellata	Syndiniales	Dino-Group-II	Dino-Group-II-Clade-5	Dino-Group-II-Clade-5_X	Dino-Group-II-Clade-5_X_sp.	Dinoflagellata (Alveolata)
1023	0	21	0	0	0	0	0	0	0	0	0	0	0	0	0	Eukaryota	Stramenopiles	Ochrophyta	Bacillariophyta	Bacillariophyta_X	Polar-centric-Mediophyceae	Chaetoceros	Chaetoceros_tenuissimus	Bacillariophyta (Stramenopiles)
1026	0	0	0	0	0	0	0	0	0	0	0	0	0	58	87	Eukaryota	Stramenopiles	Ochrophyta	Bacillariophyta	Bacillariophyta_X	Radial-centric-basal-Coscinodiscophyceae	Guinardia	Guinardia_flaccida	Bacillariophyta (Stramenopiles)
1027	0	0	0	0	0	0	10	0	2	0	18	2	9	4	144	Eukaryota	Alveolata	Ciliophora	Phyllopharyngea	Cyrtophoria_1	PHYLL_4	PHYLL_4_X	PHYLL_4_X_sp.	Ciliophora (Alveolata)
1028	0	0	0	0	0	0	35	0	0	0	0	0	0	0	0	Eukaryota	Hacrobia	Haptophyta	Prymnesiophyceae	Prymnesiales	Chrysochromulinaceae	Chrysochromulina	Chrysochromulina_sp.	Flagellated cells
1029	0	0	0	0	0	0	0	22	0	0	0	0	0	0	0	Eukaryota	Opisthokonta	Choanoflagellida	Choanoflagellatea	Acanthoecida	Stephanoecidae_Group_I	Stephanoecidae_Group_I_X	Stephanoecidae_Group_I_X_sp.	Flagellated cells
1030	0	0	18	42	0	0	0	0	0	0	0	0	0	0	0	Eukaryota	Rhizaria	Cercozoa	Filosa-Thecofilosea	Ebriida	Ebriida_X	Ebriida_XX	Ebriida_XX_sp.	Flagellated cells
1031	0	0	0	5	0	4	0	0	0	0	0	0	0	0	0	Eukaryota	Stramenopiles	Opalozoa	MAST-3	MAST-3A	MAST-3A_X	MAST-3A_XX	MAST-3A_XX_sp.	Bacillariophyta (Stramenopiles)
1032	0	0	0	0	0	0	13	31	60	0	0	0	0	0	0	Eukaryota	Alveolata	Dinoflagellata	Dinophyceae	Dinophyceae_X	Dinophyceae_XX	Dinophyceae_XXX	Dinophyceae_XXX_sp.	Dinoflagellata (Alveolata)
1033	0	0	0	0	9	0	0	0	0	0	0	0	0	0	0	Eukaryota	Rhizaria	Cercozoa	Filosa-Thecofilosea	Ebriida	Botuliformidae	Botuliforma	Botuliforma_benthica	Flagellated cells
1034	0	0	0	0	0	0	0	538	19	0	46	0	49	13	0	Eukaryota	Alveolata	Dinoflagellata	Dinophyceae	Gymnodiniales	Gymnodiniaceae	Gyrodinium	Gyrodinium_sp.	Dinoflagellata (Alveolata)
1035	0	0	0	8	0	0	0	0	0	0	0	0	0	0	0	Eukaryota	Rhizaria	Cercozoa	Filosa-Thecofilosea	Cryomonadida	Cryothecomonas-lineage	Cryothecomonas	Cryothecomonas_aestivalis	Flagellated cells
1036	0	0	0	0	0	0	0	5	2	0	4	0	0	0	0	Eukaryota	Apusozoa	Apusomonadidae	Apusomonadidae_Group-1	Apusomonadidae_Group-1_X	Apusomonadidae_Group-1_XX	Amastigomonas	Amastigomonas_sp.	Flagellated cells
1037	0	0	0	0	0	0	78	1	0	0	0	0	0	0	6	Eukaryota	Alveolata	Dinoflagellata	Syndiniales	Dino-Group-II	Dino-Group-II-Clade-5	Dino-Group-II-Clade-5_X	Dino-Group-II-Clade-5_X_sp.	Dinoflagellata (Alveolata)
1038	0	33	0	0	33	0	0	0	0	0	0	0	0	0	0	Eukaryota	Alveolata	Dinoflagellata	Dinophyceae	Prorocentrales	Prorocentraceae	Prorocentrum	Prorocentrum_sp.	Dinoflagellata (Alveolata)
1039	0	0	0	0	0	8	0	0	0	0	0	0	0	0	0	Eukaryota	Alveolata	Dinoflagellata	Dinophyceae	Dinophyceae_X	Dinophyceae_XX	Dinophyceae_XXX	Dinophyceae_XXX_sp.	Dinoflagellata (Alveolata)
1040	0	0	0	0	0	0	0	0	0	0	16	0	0	0	0	Eukaryota	Alveolata	Ciliophora	Spirotrichea	Strombidiida	Strombidiidae_R	Strombidiidae_R_X	Strombidiidae_R_X_sp.	Ciliophora (Alveolata)
1041	0	0	0	0	0	0	0	0	0	0	0	0	0	0	11	Eukaryota	Rhizaria	Cercozoa	Cercozoa_X	Cercozoa_XX	Cercozoa_XXX	Cercozoa_XXXX	Cercozoa_XXXX_sp.	Flagellated cells
1042	0	0	2	12	0	60	0	0	0	0	0	0	0	0	0	Eukaryota	Alveolata	Dinoflagellata	Syndiniales	Dino-Group-II	Dino-Group-II-Clade-5	Dino-Group-II-Clade-5_X	Dino-Group-II-Clade-5_X_sp.	Dinoflagellata (Alveolata)
1043	0	14	20	144	127	0	0	0	0	0	0	0	0	0	0	Eukaryota	Stramenopiles	Ochrophyta	Bacillariophyta	Bacillariophyta_X	Radial-centric-basal-Coscinodiscophyceae	Actinocyclus	Actinocyclus_curvatulus	Bacillariophyta (Stramenopiles)
1044	0	0	0	4	0	7	0	0	0	0	0	0	0	0	0	Eukaryota	Stramenopiles	Ochrophyta	Bacillariophyta	Bacillariophyta_X	Araphid-pennate	Synedra	Synedra_berolinensis	Bacillariophyta (Stramenopiles)
1045	0	0	0	0	0	8	0	0	0	0	0	0	0	0	0	Eukaryota	Stramenopiles	Ochrophyta	Dictyochophyceae	Dictyochophyceae_X	Pedinellales	Pedinellales_X	Pedinellales_X_sp.	Bacillariophyta (Stramenopiles)
1047	0	0	0	0	0	0	0	12	0	0	9	0	0	0	0	Eukaryota	Hacrobia	Telonemia	Telonemia_X	Telonemia_XX	Telonemia-Group-1	Telonemia-Group-1_X	Telonemia-Group-1_X_sp.	Flagellated cells
1048	0	0	2	0	0	50	0	0	0	0	0	0	0	0	0	Eukaryota	Alveolata	Dinoflagellata	Syndiniales	Dino-Group-II	Dino-Group-II-Clade-5	Dino-Group-II-Clade-5_X	Dino-Group-II-Clade-5_X_sp.	Dinoflagellata (Alveolata)
1049	0	0	0	0	0	0	67	0	0	0	0	0	0	0	0	Eukaryota	Alveolata	Ciliophora	Spirotrichea	Choreotrichida	Leegaardiellidae_B	Leegaardiella	Leegaardiella_sp.	Ciliophora (Alveolata)
1050	0	0	0	0	0	0	0	0	0	43	0	0	0	0	51	Eukaryota	Alveolata	Dinoflagellata	Dinophyceae	Dinophyceae_X	Dinophyceae_XX	Dinophyceae_XXX	Dinophyceae_XXX_sp.	Dinoflagellata (Alveolata)
1051	0	0	0	0	0	0	0	0	0	0	0	0	0	98	0	Eukaryota	Alveolata	Dinoflagellata	Dinophyceae	Dinophyceae_X	Dinophyceae_XX	Dinophyceae_XXX	Dinophyceae_XXX_sp.	Dinoflagellata (Alveolata)
1054	0	0	24	13	0	98	0	0	0	0	0	0	0	0	0	Eukaryota	Alveolata	Dinoflagellata	Syndiniales	Dino-Group-II	Dino-Group-II-Clade-14	Dino-Group-II-Clade-14_X	Dino-Group-II-Clade-14_X_sp.	Dinoflagellata (Alveolata)
1056	10	0	0	0	0	0	0	0	0	0	0	0	0	0	0	Eukaryota	Alveolata	Dinoflagellata	Dinophyceae	Gymnodiniales	Gymnodiniaceae	Gyrodinium	Gyrodinium_sp.	Dinoflagellata (Alveolata)
1057	0	0	0	0	0	0	30	0	0	0	0	0	0	0	0	Eukaryota	Alveolata	Ciliophora	Spirotrichea	Strombidiida	Strombidiidae	Varistrombidium	Varistrombidium_kielum	Ciliophora (Alveolata)
1058	0	0	0	0	0	0	546	721	404	0	0	0	0	0	0	Eukaryota	Alveolata	Dinoflagellata	Dinophyceae	Gymnodiniales	Gymnodiniaceae	Gymnodinium	Gymnodinium_sp.	Dinoflagellata (Alveolata)
1059	0	0	0	0	0	0	0	0	0	0	0	0	0	0	7	Eukaryota	Alveolata	Dinoflagellata	Syndiniales	Dino-Group-II	Dino-Group-II-Clade-10-and-11	Dino-Group-II-Clade-10-and-11_X	Dino-Group-II-Clade-10-and-11_X_sp.	Dinoflagellata (Alveolata)
1060	0	0	0	0	0	23	0	0	0	0	0	0	0	0	0	Eukaryota	Alveolata	Ciliophora	Spirotrichea	Strombidiida_B	Strombidiida_B_X	Strombidiida_B_XX	Strombidiida_B_XX_sp.	Ciliophora (Alveolata)
1061	0	0	0	0	0	33	0	0	0	0	0	0	0	0	0	Eukaryota	Hacrobia	Haptophyta	Prymnesiophyceae	Prymnesiales	Prymnesiaceae	Haptolina	Haptolina_sp.	Flagellated cells
1062	0	0	0	0	0	0	21	0	6	0	0	0	0	0	0	Eukaryota	Rhizaria	Cercozoa	Filosa-Thecofilosea	Ventricleftida	Ventricleftida_X	Ventricleftida_XX	Ventricleftida_XX_sp.	Flagellated cells
1063	0	0	0	0	0	0	5	0	0	0	0	0	0	0	0	Eukaryota	Alveolata	Dinoflagellata	Syndiniales	Dino-Group-II	Dino-Group-II-Clade-1	Dino-Group-II-Clade-1_X	Dino-Group-II-Clade-1_X_sp.	Dinoflagellata (Alveolata)
1065	0	0	0	0	0	0	0	0	0	20	3	0	0	0	0	Eukaryota	Rhizaria	Cercozoa	Filosa-Imbricatea	Marimonadida	Marimonadida_X	Marimonadida_XX	Marimonadida_XX_sp.	Flagellated cells
1066	0	0	0	7	0	0	0	0	0	0	0	0	0	0	0	Eukaryota	Stramenopiles	Ochrophyta	Dictyochophyceae	Dictyochophyceae_X	Pedinellales	Pedinellales_X	Pedinellales_X_sp.	Bacillariophyta (Stramenopiles)
1067	0	0	0	0	0	9	0	0	0	0	0	0	0	0	0	Eukaryota	Stramenopiles	Ochrophyta	Dictyochophyceae	Dictyochophyceae_X	Pedinellales	Pseudopedinella	Pseudopedinella_elastica	Bacillariophyta (Stramenopiles)
1068	0	0	0	0	0	0	0	11	0	0	0	0	0	32	57	Eukaryota	Alveolata	Dinoflagellata	Dinophyceae	Gonyaulacales	Ceratiaceae	Tripos	Tripos_fusus	Dinoflagellata (Alveolata)
1069	0	0	0	0	0	0	0	21	8	0	4	0	0	0	0	Eukaryota	Rhizaria	Cercozoa	Filosa-Thecofilosea	Filosa-Thecofilosea_X	Novel-Clade-4	Novel-Clade-4_X	Novel-Clade-4_X_sp.	Flagellated cells
1070	0	0	0	11	0	0	0	0	0	0	0	0	0	0	0	Eukaryota	Alveolata	Dinoflagellata	Syndiniales	Dino-Group-II	Dino-Group-II-Clade-1	Dino-Group-II-Clade-1_X	Dino-Group-II-Clade-1_X_sp.	Dinoflagellata (Alveolata)
1071	0	0	0	0	0	0	0	0	0	8	0	0	0	0	0	Eukaryota	Alveolata	Dinoflagellata	Dinophyceae	Peridiniales	Protoperidiniaceae	Protoperidinium	Protoperidinium_monovelum	Dinoflagellata (Alveolata)
1072	0	0	276	55	0	0	0	0	0	0	0	0	0	0	0	Eukaryota	Rhizaria	Cercozoa	Filosa-Thecofilosea	Ebriida	TAGIRI1-lineage	TAGIRI1-lineage_X	TAGIRI1-lineage_X_sp.	Flagellated cells
1073	0	0	0	0	0	0	0	0	0	0	6	6	0	0	0	Eukaryota	Stramenopiles	Ochrophyta	Eustigmatophyceae	Eustigmatophyceae_X	Eustigmatophyceae_XX	Nannochloropsis	Nannochloropsis_granulata	Bacillariophyta (Stramenopiles)
1074	0	0	0	0	0	0	0	0	0	0	40	0	33	0	0	Eukaryota	Hacrobia	Haptophyta	Prymnesiophyceae	Phaeocystales	Phaeocystaceae	Phaeocystis	Phaeocystis_globosa	Flagellated cells
1075	0	0	0	0	0	0	12	0	0	0	0	0	0	0	0	Eukaryota	Hacrobia	Haptophyta	Prymnesiophyceae	Prymnesiales	Prymnesiophyceae_Clade_B4	Prymnesiophyceae_Clade_B4_X	Prymnesiophyceae_Clade_B4_X_sp.	Flagellated cells
1077	0	0	0	0	0	0	0	0	0	12	0	0	0	0	0	Eukaryota	Alveolata	Ciliophora	Nassophorea	Nassophorea_X	Discotrichidae	NASSO_1	NASSO_1_sp.	Ciliophora (Alveolata)
1079	0	0	0	0	0	5	0	0	0	0	0	0	0	0	0	Eukaryota	Alveolata	Dinoflagellata	Dinophyceae	Dinophyceae_X	Dinophyceae_XX	Dinophyceae_XXX	Dinophyceae_XXX_sp.	Dinoflagellata (Alveolata)
1080	0	0	0	0	0	0	0	0	0	0	6	0	0	0	0	Eukaryota	Hacrobia	Telonemia	Telonemia_X	Telonemia_XX	Telonemia-Group-1	Telonemia-Group-1_X	Telonemia-Group-1_X_sp.	Flagellated cells
1081	0	10	0	0	0	124	0	0	0	0	0	0	0	0	0	Eukaryota	Alveolata	Ciliophora	Spirotrichea	Strombidiida	Strombidiidae_M	Strombidiidae_M_X	Strombidiidae_M_X_sp.	Ciliophora (Alveolata)
1082	55	0	0	0	0	5	0	0	0	0	0	0	0	0	0	Eukaryota	Alveolata	Dinoflagellata	Dinophyceae	Dinophyceae_X	Dinophyceae_XX	Dinophyceae_XXX	Dinophyceae_XXX_sp.	Dinoflagellata (Alveolata)
1083	0	0	0	0	150	139	0	0	0	0	0	0	0	0	0	Eukaryota	Alveolata	Dinoflagellata	Syndiniales	Dino-Group-II	Dino-Group-II_X	Dino-Group-II-Clade-52_X	Dino-Group-II-Clade-52_X_sp.	Dinoflagellata (Alveolata)
1085	0	0	9	13	0	38	0	0	0	0	0	0	0	0	0	Eukaryota	Rhizaria	Cercozoa	Filosa-Imbricatea	Filosa-Imbricatea_X	Novel-clade-2	Novel-clade-2_X	Novel-clade-2_X_sp.	Flagellated cells
1086	0	4	0	0	0	33	0	0	0	0	0	0	0	0	0	Eukaryota	Hacrobia	Haptophyta	Prymnesiophyceae	Prymnesiales	Chrysochromulinaceae	Chrysochromulina	Chrysochromulina_sp.	Flagellated cells
1087	0	0	0	56	0	0	0	0	0	0	0	0	0	0	0	Eukaryota	Stramenopiles	Ochrophyta	Bacillariophyta	Bacillariophyta_X	Polar-centric-Mediophyceae	Thalassiosira	Thalassiosira_hendeyi	Bacillariophyta (Stramenopiles)
1088	0	0	0	0	0	0	0	0	0	22	0	0	0	0	17	Eukaryota	Alveolata	Dinoflagellata	Dinophyceae	Peridiniales	Thoracosphaeraceae	Scrippsiella	Scrippsiella_sweeneyae	Dinoflagellata (Alveolata)
1089	0	0	0	0	0	0	141	0	0	412	71	0	0	0	0	Eukaryota	Alveolata	Dinoflagellata	Dinophyceae	Gymnodiniales	Gymnodiniaceae	Gyrodinium	Gyrodinium_helveticum	Dinoflagellata (Alveolata)
1090	0	0	0	0	10	0	0	0	0	0	0	0	0	0	0	Eukaryota	Stramenopiles	Ochrophyta	Bacillariophyta	Bacillariophyta_X	Polar-centric-Mediophyceae	Bellerochea	Bellerochea_horologicalis	Bacillariophyta (Stramenopiles)
1091	0	0	0	0	0	0	0	0	8	0	0	0	0	0	0	Eukaryota	Amoebozoa	Lobosa	Lobosa_X	Himatismenida	Parvamoebidae	Parvamoeba	Parvamoeba_sp.	Flagellated cells
1092	0	0	0	0	0	0	40	11	0	0	0	0	0	0	0	Eukaryota	Alveolata	Dinoflagellata	Syndiniales	Dino-Group-II	Dino-Group-II-Clade-3	Dino-Group-II-Clade-3_X	Dino-Group-II-Clade-3_X_sp.	Dinoflagellata (Alveolata)
1093	0	0	0	13	0	5	0	0	0	0	0	0	0	0	0	Eukaryota	Archaeplastida	Chlorophyta	Mamiellophyceae	Mamiellales	Mamiellaceae	Micromonas	Micromonas_pusilla	Flagellated cells
1094	0	7	9	7	19	139	0	0	0	0	0	0	0	0	0	Eukaryota	Stramenopiles	Ochrophyta	Bacillariophyta	Bacillariophyta_X	Radial-centric-basal-Coscinodiscophyceae	Rhizosolenia	Rhizosolenia_similoides	Bacillariophyta (Stramenopiles)
1095	0	0	3	0	0	0	0	0	0	0	0	0	0	0	0	Eukaryota	Alveolata	Ciliophora	Nassophorea	Nassophorea_X	Discotrichidae	NASSO_1	NASSO_1_sp.	Ciliophora (Alveolata)
1096	0	0	0	0	0	0	0	0	8	0	0	0	0	0	0	Eukaryota	Archaeplastida	Chlorophyta	Nephroselmidophyceae	Nephroselmidales	Nephroselmidales_X	Nephroselmis	Nephroselmis_pyriformis	Flagellated cells
1097	0	0	0	0	0	0	1	0	0	0	2	0	0	0	7	Eukaryota	Alveolata	Ciliophora	CONThreeP	CONThreeP_X	CONThreeP_XX	Askenasia	Askenasia_sp.	Ciliophora (Alveolata)
1098	0	0	0	0	0	0	0	0	0	0	0	0	0	8	0	Eukaryota	Rhizaria	Cercozoa	Endomyxa	Vampyrellida	Sey055-lineage	Sey055-lineage_X	Sey055-lineage_X_sp.	Flagellated cells
1099	0	0	0	0	0	8	0	0	0	0	0	0	0	0	0	Eukaryota	Rhizaria	Cercozoa	Endomyxa	Vampyrellida	Sey055-lineage	Sey055-lineage_X	Sey055-lineage_X_sp.	Flagellated cells
1101	0	13	0	0	0	0	0	0	0	0	0	0	0	0	0	Eukaryota	Rhizaria	Cercozoa	Filosa-Thecofilosea	Cryomonadida	Protaspa-lineage	Protaspa-lineage_X	Protaspa-lineage_X_sp.	Flagellated cells
1102	0	0	0	0	0	0	25	0	0	0	0	0	0	0	0	Eukaryota	Rhizaria	Cercozoa	Filosa-Thecofilosea	Ventricleftida	Ventrifissuridae	Ventrifissura	Ventrifissura_foliiformis	Flagellated cells
1103	0	0	0	0	0	5	0	0	0	0	0	0	0	0	0	Eukaryota	Alveolata	Dinoflagellata	Dinophyceae	Dinophyceae_X	Oodiniaceae	Oodinium	Oodinium_pouchetii	Dinoflagellata (Alveolata)
1104	0	0	0	0	0	0	14	0	0	0	0	0	0	52	24	Eukaryota	Alveolata	Dinoflagellata	Dinophyceae	Peridiniales	Heterocapsaceae	Heterocapsa	Heterocapsa_sp.	Dinoflagellata (Alveolata)
1105	0	4	0	26	0	46	0	0	0	0	0	0	0	0	0	Eukaryota	Alveolata	Dinoflagellata	Dinophyceae	Dinophyceae_X	Dinophyceae_XX	Dinophyceae_XXX	Dinophyceae_XXX_sp.	Dinoflagellata (Alveolata)
1106	0	0	0	0	0	0	0	0	11	0	0	0	0	0	0	Eukaryota	Stramenopiles	Ochrophyta	Bacillariophyta	Bacillariophyta_X	Polar-centric-Mediophyceae	Thalassiosira	Thalassiosira_hendeyi	Bacillariophyta (Stramenopiles)
1107	0	0	0	0	0	4	0	0	0	0	0	0	0	0	0	Eukaryota	Stramenopiles	Ochrophyta	MOCH-1	MOCH-1_X	MOCH-1_XX	MOCH-1_XXX	MOCH-1_XXX_sp.	Bacillariophyta (Stramenopiles)
1108	0	0	0	0	5	41	0	0	0	0	0	0	0	0	0	Eukaryota	Alveolata	Dinoflagellata	Syndiniales	Dino-Group-II	Dino-Group-II-Clade-4	Dino-Group-II-Clade-4_X	Dino-Group-II-Clade-4_X_sp.	Dinoflagellata (Alveolata)
1109	0	13	14	2	0	5	0	0	0	0	0	0	0	0	0	Eukaryota	Stramenopiles	Ochrophyta	Bacillariophyta	Bacillariophyta_X	Polar-centric-Mediophyceae	Chaetoceros	Chaetoceros_debilis	Bacillariophyta (Stramenopiles)
1110	0	0	0	0	0	0	0	19	0	0	0	0	0	0	0	Eukaryota	Rhizaria	Cercozoa	Filosa-Thecofilosea	Filosa-Thecofilosea_X	Novel-Clade-4	Novel-Clade-4_X	Novel-Clade-4_X_sp.	Flagellated cells
1111	0	0	0	0	44	0	0	0	0	0	0	0	0	0	0	Eukaryota	Rhizaria	Cercozoa	Filosa-Thecofilosea	Ebriida	TAGIRI1-lineage	TAGIRI1-lineage_X	TAGIRI1-lineage_X_sp.	Flagellated cells
1113	0	0	127	29	0	0	0	0	0	0	0	0	0	0	0	Eukaryota	Rhizaria	Cercozoa	Filosa-Thecofilosea	Cryomonadida	Cryomonadida_X	Cryomonadida_XX	Cryomonadida_XX_sp.	Flagellated cells
1115	0	0	0	0	0	0	0	0	0	0	16	0	0	20	0	Eukaryota	Hacrobia	Haptophyta	Prymnesiophyceae	Prymnesiales	Chrysochromulinaceae	Chrysochromulina	Chrysochromulina_sp.	Flagellated cells
1117	0	0	0	29	52	7	0	0	0	0	0	0	0	0	0	Eukaryota	Opisthokonta	Mesomycetozoa	Ichthyosporea	Rhynosporida	Rhynosporidae	Rhynosporidae_X	Rhynosporidae_X_sp.	Flagellated cells
1118	0	0	0	0	24	0	0	0	0	0	0	0	0	0	0	Eukaryota	Alveolata	Ciliophora	Spirotrichea	Tintinnida	Eutintinnidae	Eutintinnus	Eutintinnus_lususundae	Ciliophora (Alveolata)
1119	0	0	0	0	0	0	0	0	0	59	0	16	0	0	50	Eukaryota	Alveolata	Dinoflagellata	Dinophyceae	Gymnodiniales	Gymnodiniaceae	Gyrodinium	Gyrodinium_fusiforme	Dinoflagellata (Alveolata)
1121	0	0	0	0	0	0	0	36	142	12	35	1002	18	0	0	Eukaryota	Alveolata	Dinoflagellata	Dinophyceae	Dinophyceae_X	Dinophyceae_XX	Dinophyceae_XXX	Dinophyceae_XXX_sp.	Dinoflagellata (Alveolata)
1122	0	0	0	0	0	0	5	0	0	0	0	0	0	0	0	Eukaryota	Stramenopiles	Ochrophyta	Bacillariophyta	Bacillariophyta_X	Polar-centric-Mediophyceae	Chaetoceros	Chaetoceros_tenuissimus	Bacillariophyta (Stramenopiles)
1123	0	0	0	14	0	0	0	0	0	0	0	0	0	0	0	Eukaryota	Excavata	Discoba	Euglenozoa	Euglenida	Rhabdomonadales	Distigma	Distigma_elegans	Flagellated cells
1124	0	0	0	0	0	8	0	0	0	0	0	0	0	0	0	Eukaryota	Stramenopiles	Ochrophyta	MOCH-2	MOCH-2_X	MOCH-2_XX	MOCH-2_XXX	MOCH-2_XXX_sp.	Bacillariophyta (Stramenopiles)
1125	0	0	0	11	0	0	0	0	0	0	0	0	0	0	0	Eukaryota	Stramenopiles	Ochrophyta	MOCH-3	MOCH-3_X	MOCH-3_XX	MOCH-3_XXX	MOCH-3_XXX_sp.	Bacillariophyta (Stramenopiles)
1126	0	0	0	0	0	0	0	373	22	0	6	0	0	0	0	Eukaryota	Rhizaria	Cercozoa	Filosa-Thecofilosea	Ebriida	TAGIRI1-lineage	TAGIRI1-lineage_X	TAGIRI1-lineage_X_sp.	Flagellated cells
1127	0	0	0	0	0	0	0	0	1	4	3	0	5	1	7	Eukaryota	Alveolata	Dinoflagellata	Dinophyceae	Dinophyceae_X	Dinophyceae_XX	Dinophyceae_XXX	Dinophyceae_XXX_sp.	Dinoflagellata (Alveolata)
1128	0	0	0	0	0	0	8	0	0	0	12	56	0	0	0	Eukaryota	Alveolata	Dinoflagellata	Dinophyceae	Gymnodiniales	Gymnodiniaceae	Spiniferodinium	Spiniferodinium_palauense	Dinoflagellata (Alveolata)
1129	0	0	0	11	0	30	0	0	0	0	0	0	0	0	0	Eukaryota	Alveolata	Ciliophora	Spirotrichea	Choreotrichida	Leegaardiellidae_B	Leegaardiella	Leegaardiella_sp.	Ciliophora (Alveolata)
1131	0	0	0	0	0	0	15	26	0	0	0	0	0	0	0	Eukaryota	Alveolata	Ciliophora	Phyllopharyngea	Cyrtophoria_1	PHYLL_4	PHYLL_4_X	PHYLL_4_X_sp.	Ciliophora (Alveolata)
1132	0	0	0	0	0	0	0	0	0	33	0	0	0	0	0	Eukaryota	Rhizaria	Cercozoa	Filosa-Thecofilosea	Ventricleftida	Ventricleftida_X	Ventricleftida_XX	Ventricleftida_XX_sp.	Flagellated cells
1134	0	0	0	0	0	0	0	0	0	0	5	4	0	0	0	Eukaryota	Rhizaria	Cercozoa	Filosa-Thecofilosea	Filosa-Thecofilosea_X	Mataza-lineage	Mataza	Mataza_hastifera	Flagellated cells
1135	0	0	0	0	6	0	0	0	0	0	0	0	0	0	0	Eukaryota	Alveolata	Dinoflagellata	Dinophyceae	Gymnodiniales	Gymnodiniaceae	Gyrodinium	Gyrodinium_fusiforme	Dinoflagellata (Alveolata)
1136	0	0	0	0	0	51	0	0	0	0	0	0	0	0	0	Eukaryota	Alveolata	Dinoflagellata	Syndiniales	Dino-Group-II	Dino-Group-II-Clade-5	Dino-Group-II-Clade-5_X	Dino-Group-II-Clade-5_X_sp.	Dinoflagellata (Alveolata)
1137	0	0	0	0	0	0	0	0	0	0	0	0	0	0	421	Eukaryota	Stramenopiles	Ochrophyta	Bacillariophyta	Bacillariophyta_X	Radial-centric-basal-Coscinodiscophyceae	Leptocylindrus	Leptocylindrus_sp.	Bacillariophyta (Stramenopiles)
1138	0	0	0	0	0	2	0	0	0	0	0	0	0	0	0	Eukaryota	Alveolata	Ciliophora	Spirotrichea	Choreotrichida	Leegaardiellidae_A	Leegaardiellidae_A_X	Leegaardiellidae_A_X_sp.	Ciliophora (Alveolata)
1139	0	0	0	0	0	5	0	0	0	0	0	0	0	0	0	Eukaryota	Alveolata	Dinoflagellata	Syndiniales	Dino-Group-II	Dino-Group-II-Clade-10-and-11	Dino-Group-II-Clade-10-and-11_X	Dino-Group-II-Clade-10-and-11_X_sp.	Dinoflagellata (Alveolata)
1140	0	0	0	197	24	249	0	0	0	0	0	0	0	0	0	Eukaryota	Stramenopiles	Ochrophyta	Bacillariophyta	Bacillariophyta_X	Araphid-pennate	Delphineis	Delphineis_sp.	Bacillariophyta (Stramenopiles)
1141	0	0	0	0	0	0	0	0	0	63	0	0	15	0	0	Eukaryota	Rhizaria	Cercozoa	Filosa-Thecofilosea	Cryomonadida	Protaspa-lineage	Protaspa-lineage_X	Protaspa-lineage_X_sp.	Flagellated cells
1144	0	95	4	11	12	0	0	0	0	0	0	0	0	0	0	Eukaryota	Stramenopiles	Ochrophyta	Raphidophyceae	Raphidophyceae_X	Raphidophyceae_XX	Fibrocapsa	Fibrocapsa_japonica	Bacillariophyta (Stramenopiles)
1146	0	0	0	0	0	0	0	0	0	8	0	0	0	0	0	Eukaryota	Alveolata	Dinoflagellata	Dinophyceae	Gymnodiniales	Gymnodiniaceae	Gyrodinium	Gyrodinium_fusiforme	Dinoflagellata (Alveolata)
1147	0	0	0	0	0	0	0	19	58	0	19	0	0	0	0	Eukaryota	Stramenopiles	Ochrophyta	Bacillariophyta	Bacillariophyta_X	Polar-centric-Mediophyceae	Minutocellus	Minutocellus_polymorphus	Bacillariophyta (Stramenopiles)
1148	0	0	0	0	0	0	5	0	0	0	0	0	0	0	0	Eukaryota	Hacrobia	Telonemia	Telonemia_X	Telonemia_XX	Telonemia-Group-1	Telonemia-Group-1_X	Telonemia-Group-1_X_sp.	Flagellated cells
1149	0	0	0	5	0	0	0	0	0	0	0	0	0	0	0	Eukaryota	Rhizaria	Cercozoa	Endomyxa	Vampyrellida	Vampyrellida_X	Thalassomyxa	Thalassomyxa_sp.	Flagellated cells
1150	0	0	0	0	0	0	4	0	0	0	0	47	0	0	0	Eukaryota	Alveolata	Dinoflagellata	Syndiniales	Dino-Group-II	Dino-Group-II-Clade-12	Dino-Group-II-Clade-12_X	Dino-Group-II-Clade-12_X_sp.	Dinoflagellata (Alveolata)
1151	0	0	0	0	0	0	24	0	0	0	0	0	0	0	0	Eukaryota	Hacrobia	Haptophyta	Prymnesiophyceae	Prymnesiophyceae_Clade_D	Prymnesiophyceae_Clade_D_X	Prymnesiophyceae_Clade_D_XX	Prymnesiophyceae_Clade_D_XX_sp.	Flagellated cells
1152	0	0	0	0	0	0	0	18	0	0	3	0	0	0	0	Eukaryota	Alveolata	Dinoflagellata	Dinophyceae	Dinophyceae_X	Dinophyceae_XX	Dinophyceae_XXX	Dinophyceae_XXX_sp.	Dinoflagellata (Alveolata)
1153	0	0	0	0	0	4	0	0	0	0	0	0	0	0	0	Eukaryota	Archaeplastida	Chlorophyta	Nephroselmidophyceae	Nephroselmidales	Nephroselmidales_X	Nephroselmis	Nephroselmis_pyriformis	Flagellated cells
1154	0	0	0	0	0	0	24	0	0	57	5	6	0	11	1271	Eukaryota	Stramenopiles	Ochrophyta	Bacillariophyta	Bacillariophyta_X	Radial-centric-basal-Coscinodiscophyceae	Guinardia	Guinardia_delicatula	Bacillariophyta (Stramenopiles)
1155	0	0	0	0	0	0	0	38	95	61	214	11	418	13	0	Eukaryota	Hacrobia	Telonemia	Telonemia_X	Telonemia_XX	Telonemia-Group-2	Telonemia-Group-2_X	Telonemia-Group-2_X_sp.	Flagellated cells
1156	0	0	1	0	0	24	0	0	0	0	0	0	0	0	0	Eukaryota	Alveolata	Ciliophora	Phyllopharyngea	Cyrtophoria_1	PHYLL_4	PHYLL_4_X	PHYLL_4_X_sp.	Ciliophora (Alveolata)
1157	0	0	0	3	3	0	0	0	0	0	0	0	0	0	0	Eukaryota	Rhizaria	Cercozoa	Filosa-Imbricatea	Marimonadida	Marimonadida_X	Auranticordis	Auranticordis_quadriverberis	Flagellated cells
1158	0	0	6	0	8	20	0	0	0	0	0	0	0	0	0	Eukaryota	Alveolata	Dinoflagellata	Syndiniales	Dino-Group-II	Dino-Group-II-Clade-12	Dino-Group-II-Clade-12_X	Dino-Group-II-Clade-12_X_sp.	Dinoflagellata (Alveolata)
1159	0	0	0	0	0	0	9	0	0	0	0	0	0	0	0	Eukaryota	Rhizaria	Cercozoa	Filosa-Imbricatea	Euglyphida	Paulinellidae	Paulinella	Paulinella_chromatophora	Flagellated cells
1160	0	0	0	0	0	0	0	0	0	0	0	22	0	0	0	Eukaryota	Alveolata	Dinoflagellata	Dinophyceae	Dinophyceae_X	Dinophyceae_XX	Dinophyceae_XXX	Dinophyceae_XXX_sp.	Dinoflagellata (Alveolata)
1161	0	0	0	0	0	0	50	262	93	0	87	0	0	0	0	Eukaryota	Alveolata	Dinoflagellata	Dinophyceae	Gymnodiniales	Gymnodiniaceae	Gymnodinium	Gymnodinium_sp.	Dinoflagellata (Alveolata)
1162	0	0	0	0	0	0	0	4	6	0	0	0	0	0	0	Eukaryota	Stramenopiles	Ochrophyta	Raphidophyceae	Raphidophyceae_X	Raphidophyceae_XX	Fibrocapsa	Fibrocapsa_japonica	Bacillariophyta (Stramenopiles)
1163	0	8	6	10	0	0	0	0	0	0	0	0	0	0	0	Eukaryota	Rhizaria	Cercozoa	Filosa-Thecofilosea	Cryomonadida	Protaspa-lineage	Protaspa-lineage_X	Protaspa-lineage_X_sp.	Flagellated cells
1165	0	24	0	0	0	0	0	0	0	0	0	0	0	0	0	Eukaryota	Stramenopiles	Ochrophyta	Raphidophyceae	Raphidophyceae_X	Raphidophyceae_XX	Heterosigma	Heterosigma_akashiwo	Bacillariophyta (Stramenopiles)
1166	0	0	0	2	34	0	0	0	0	0	0	0	0	0	0	Eukaryota	Rhizaria	Cercozoa	Filosa-Thecofilosea	Ebriida	Botuliformidae	Botuliforma	Botuliforma_benthica	Flagellated cells
1167	9	0	0	0	0	0	0	0	0	0	0	0	0	0	0	Eukaryota	Alveolata	Dinoflagellata	Dinophyceae	Peridiniales	Thoracosphaeraceae	Scrippsiella	Scrippsiella_sweeneyae	Dinoflagellata (Alveolata)
1168	0	0	0	0	0	0	7	0	0	0	0	0	0	0	0	Eukaryota	Archaeplastida	Chlorophyta	Nephroselmidophyceae	Nephroselmidales	Nephroselmidales_X	Nephroselmis	Nephroselmis_pyriformis	Flagellated cells
1169	18	0	0	0	0	11	0	0	0	0	0	0	0	0	0	Eukaryota	Alveolata	Ciliophora	Spirotrichea	Strombidiida	Strombidiidae	Strombidium	Strombidium_sp.	Ciliophora (Alveolata)
1170	0	0	0	0	0	0	0	3	0	0	3	0	0	1	0	Eukaryota	Alveolata	Ciliophora	Oligohymenophorea	Apostomatia	Foettingeriidae	Hyalophysa	Hyalophysa_lwoffi	Ciliophora (Alveolata)
1171	0	0	0	0	0	0	0	0	0	0	0	0	14	0	0	Eukaryota	Stramenopiles	Opalozoa	Bicoecea	Anoecales	Caecitellaceae	Caecitellus	Caecitellus_paraparvulus	Bacillariophyta (Stramenopiles)
1172	0	0	9	0	0	0	0	0	0	0	0	0	0	0	0	Eukaryota	Stramenopiles	Ochrophyta	Bacillariophyta	Bacillariophyta_X	Raphid-pennate	Pseudo-nitzschia	Pseudo-nitzschia_sp.	Bacillariophyta (Stramenopiles)
1173	4	0	0	0	0	0	0	0	0	0	0	0	0	0	0	Eukaryota	Archaeplastida	Chlorophyta	Palmophyllophyceae	Prasinococcales	Prasinococcales-Clade-B	Prasinococcales-Clade-B_X	Prasinococcales-Clade-B_X_sp.	Flagellated cells
1176	0	0	0	0	0	0	0	0	19	0	0	0	0	0	0	Eukaryota	Rhizaria	Cercozoa	Filosa-Imbricatea	Thaumatomonadida	Thaumatomonadidae	Thaumatomastix	Thaumatomastix_sp.	Flagellated cells
1178	0	0	4	9	8	0	0	0	0	0	0	0	0	0	0	Eukaryota	Alveolata	Dinoflagellata	Syndiniales	Dino-Group-II	Dino-Group-II-Clade-1	Dino-Group-II-Clade-1_X	Dino-Group-II-Clade-1_X_sp.	Dinoflagellata (Alveolata)
1179	0	0	0	0	0	0	0	0	0	0	0	0	8	15	0	Eukaryota	Stramenopiles	Opalozoa	Bicoecea	Anoecales	Caecitellaceae	Caecitellus	Caecitellus_parvulus	Bacillariophyta (Stramenopiles)
1181	0	0	0	0	0	0	0	0	11	0	0	0	0	0	0	Eukaryota	Stramenopiles	Opalozoa	MAST-3	MAST-3I	MAST-3I_X	MAST-3I_XX	MAST-3I_XX_sp.	Bacillariophyta (Stramenopiles)
1182	0	0	0	0	0	0	8	11	0	0	0	0	0	0	0	Eukaryota	Hacrobia	Haptophyta	Prymnesiophyceae	Prymnesiales	Chrysochromulinaceae	Chrysochromulina	Chrysochromulina_sp.	Flagellated cells
1183	0	0	2	0	0	0	0	0	0	0	0	0	0	0	0	Eukaryota	Opisthokonta	Mesomycetozoa	Ichthyosporea	Rhynosporida	Rhynosporidae	Rhynosporidae_X	Rhynosporidae_X_sp.	Flagellated cells
1184	0	0	0	10	0	19	0	0	0	0	0	0	0	0	0	Eukaryota	Alveolata	Dinoflagellata	Syndiniales	Dino-Group-II	Dino-Group-II-Clade-12	Dino-Group-II-Clade-12_X	Dino-Group-II-Clade-12_X_sp.	Dinoflagellata (Alveolata)
1186	0	0	0	0	0	0	0	3	0	0	0	0	0	0	0	Eukaryota	Alveolata	Dinoflagellata	Dinophyceae	Gymnodiniales	Chytriodiniaceae	Dissodinium	Dissodinium_pseudolunula	Dinoflagellata (Alveolata)
1187	0	0	0	0	0	0	0	193	0	0	0	0	0	0	0	Eukaryota	Alveolata	Dinoflagellata	Dinophyceae	Gymnodiniales	Gymnodiniaceae	Gyrodinium	Gyrodinium_spirale	Dinoflagellata (Alveolata)
1188	0	13	10	0	0	0	0	0	0	0	0	0	0	0	0	Eukaryota	Alveolata	Dinoflagellata	Dinophyceae	Gymnodiniales	Gymnodiniaceae	Gyrodinium	Gyrodinium_fusiforme	Dinoflagellata (Alveolata)
1189	0	0	0	0	0	0	42	0	0	0	0	0	0	0	0	Eukaryota	Alveolata	Ciliophora	Spirotrichea	Strombidiida	Strombidiidae_H	Strombidiidae_H_X	Strombidiidae_H_X_sp.	Ciliophora (Alveolata)
1190	0	0	0	0	0	0	0	0	5	0	9	0	0	0	0	Eukaryota	Rhizaria	Cercozoa	Filosa-Thecofilosea	Cryomonadida	Protaspa-lineage	Protaspa	Protaspa_grandis	Flagellated cells
1192	0	0	0	0	0	0	37	6	0	0	0	0	0	0	0	Eukaryota	Alveolata	Dinoflagellata	Syndiniales	Dino-Group-II	Dino-Group-II-Clade-1	Dino-Group-II-Clade-1_X	Dino-Group-II-Clade-1_X_sp.	Dinoflagellata (Alveolata)
1193	0	0	0	0	0	0	0	22	0	0	0	0	0	0	0	Eukaryota	Rhizaria	Cercozoa	Filosa-Imbricatea	Filosa-Imbricatea_X	Novel-clade-2	Novel-clade-2_X	Novel-clade-2_X_sp.	Flagellated cells
1194	0	0	0	0	0	0	10	27	0	0	0	0	0	17	0	Eukaryota	Stramenopiles	Ochrophyta	Bolidophyceae	Parmales	Parmales_env_3	Parmales_env_3A	Parmales_env_3A_sp.	Bacillariophyta (Stramenopiles)
1195	0	0	0	0	0	0	86	0	0	0	0	0	0	0	0	Eukaryota	Stramenopiles	Ochrophyta	Bacillariophyta	Bacillariophyta_X	Raphid-pennate	Pleurosigma	Pleurosigma_sp.	Bacillariophyta (Stramenopiles)
1196	0	0	0	0	0	8	0	0	0	0	0	0	0	0	0	Eukaryota	Rhizaria	Cercozoa	Filosa-Imbricatea	Filosa-Imbricatea_X	Novel-clade-2	Novel-clade-2_X	Novel-clade-2_X_sp.	Flagellated cells
1197	0	0	11	19	17	0	0	0	0	0	0	0	0	0	0	Eukaryota	Alveolata	Dinoflagellata	Syndiniales	Dino-Group-II	Dino-Group-II-Clade-5	Dino-Group-II-Clade-5_X	Dino-Group-II-Clade-5_X_sp.	Dinoflagellata (Alveolata)
1198	0	0	0	9	0	0	0	0	0	0	0	0	0	0	0	Eukaryota	Stramenopiles	Ochrophyta	Bacillariophyta	Bacillariophyta_X	Polar-centric-Mediophyceae	Polar-centric-Mediophyceae_X	Polar-centric-Mediophyceae_X_sp.	Bacillariophyta (Stramenopiles)
1199	3	0	0	0	0	191	0	0	0	0	0	0	0	0	0	Eukaryota	Hacrobia	Telonemia	Telonemia_X	Telonemia_XX	Telonemia-Group-2	Telonemia-Group-2_X	Telonemia-Group-2_X_sp.	Flagellated cells
1200	0	0	0	0	0	0	0	10	0	0	0	0	0	0	0	Eukaryota	Opisthokonta	Mesomycetozoa	Nucleariidea	Nucleariida	Nucleariida_X	Nuclearia	Nuclearia_delicatula	Flagellated cells
1201	0	0	0	0	0	0	0	0	9	0	0	0	0	0	0	Eukaryota	Stramenopiles	Opalozoa	Bicoecea	Anoecales	Cafeteriaceae	Pseudobodo	Pseudobodo_sp.	Bacillariophyta (Stramenopiles)
1202	0	0	0	0	0	0	0	39	60	0	34	0	0	0	0	Eukaryota	Rhizaria	Cercozoa	Filosa-Imbricatea	Marimonadida	Marimonadida_X	Marimonadida_XX	Marimonadida_XX_sp.	Flagellated cells
1203	0	0	0	0	0	0	0	0	0	0	0	0	5	6	0	Eukaryota	Rhizaria	Cercozoa	Filosa-Thecofilosea	Ventricleftida	Ventrifissuridae	Ventrifissuridae_X	Ventrifissuridae_X_sp.	Flagellated cells
1204	0	0	0	0	0	0	7	0	0	0	0	0	0	0	0	Eukaryota	Rhizaria	Cercozoa	Filosa-Thecofilosea	Cryomonadida	Protaspa-lineage	Protaspa-lineage_X	Protaspa-lineage_X_sp.	Flagellated cells
1205	0	0	0	0	0	0	0	8	0	0	0	0	0	0	0	Eukaryota	Rhizaria	Cercozoa	Cercozoa_X	Cercozoa_XX	Cercozoa_XXX	Cercozoa_XXXX	Cercozoa_XXXX_sp.	Flagellated cells
1207	0	569	15	40	54	278	0	0	0	0	0	0	0	0	0	Eukaryota	Stramenopiles	Ochrophyta	Bacillariophyta	Bacillariophyta_X	Radial-centric-basal-Coscinodiscophyceae	Guinardia	Guinardia_delicatula	Bacillariophyta (Stramenopiles)
1208	0	0	0	0	0	0	0	24	0	0	0	0	13	18	45	Eukaryota	Hacrobia	Telonemia	Telonemia_X	Telonemia_XX	Telonemia-Group-2	Telonemia-Group-2_X	Telonemia-Group-2_X_sp.	Flagellated cells
1209	71	0	0	0	0	0	0	0	0	0	0	0	0	0	0	Eukaryota	Alveolata	Dinoflagellata	Dinophyceae	Gymnodiniales	Gymnodiniaceae	Gyrodinium	Gyrodinium_fusiforme	Dinoflagellata (Alveolata)
1210	0	0	0	5	4	6	0	0	0	0	0	0	0	0	0	Eukaryota	Stramenopiles	Ochrophyta	Bacillariophyta	Bacillariophyta_X	Polar-centric-Mediophyceae	Papiliocellulus	Papiliocellulus_simplex	Bacillariophyta (Stramenopiles)
1211	0	0	0	0	0	0	16	47	9	0	5	0	0	0	0	Eukaryota	Rhizaria	Cercozoa	Filosa-Imbricatea	Filosa-Imbricatea_X	Novel-clade-2	Novel-clade-2_X	Novel-clade-2_X_sp.	Flagellated cells
1212	0	0	0	0	0	0	0	0	0	0	0	0	0	11	0	Eukaryota	Opisthokonta	Mesomycetozoa	Nucleariidea	Nucleariida	Nucleariida_X	Nuclearia	Nuclearia_delicatula	Flagellated cells
1213	0	0	0	0	0	0	0	0	12	0	0	1	0	0	0	Eukaryota	Rhizaria	Cercozoa	Endomyxa	Vampyrellida	Vampyrellida_X	Vampyrellida_clade_B	Vampyrellida_sp.	Flagellated cells
1214	3	0	0	0	0	0	0	0	0	0	0	0	0	0	0	Eukaryota	Rhizaria	Cercozoa	Filosa-Imbricatea	Euglyphida	Paulinellidae	Paulinella	Paulinella_chromatophora	Flagellated cells
1215	0	0	0	0	0	0	0	23	32	0	0	33	0	0	0	Eukaryota	Alveolata	Dinoflagellata	Dinophyceae	Dinophyceae_X	Tovelliaceae	Woloszynskia	Woloszynskia_halophila	Dinoflagellata (Alveolata)
1217	0	0	0	0	0	0	0	0	0	0	0	0	277	0	36	Eukaryota	Stramenopiles	Opalozoa	Bicoecea	Bicoecales	Bicoecaceae	Bicoecaceae_X	Bicoecaceae_X_sp.	Bacillariophyta (Stramenopiles)
1218	0	0	0	0	0	0	0	48	103	0	0	0	0	0	0	Eukaryota	Rhizaria	Cercozoa	Filosa-Thecofilosea	Cryomonadida	Cryothecomonas-lineage	Cryothecomonas	Cryothecomonas_aestivalis	Flagellated cells
1219	0	0	0	0	0	0	0	0	0	0	0	0	0	7	0	Eukaryota	Rhizaria	Cercozoa	Filosa-Thecofilosea	Ventricleftida	Ventrifissuridae	Ventrifissura	Ventrifissura_foliiformis	Flagellated cells
1220	0	0	0	0	0	0	35	0	0	0	0	0	0	0	0	Eukaryota	Alveolata	Dinoflagellata	Syndiniales	Dino-Group-II	Dino-Group-II-Clade-6	Dino-Group-II-Clade-6_X	Dino-Group-II-Clade-6_X_sp.	Dinoflagellata (Alveolata)
1221	0	0	0	0	0	0	0	0	0	0	0	0	12	0	0	Eukaryota	Alveolata	Dinoflagellata	Dinophyceae	Dinophyceae_X	Dinophyceae_XX	Dinophyceae_XXX	Dinophyceae_XXX_sp.	Dinoflagellata (Alveolata)
1222	0	570	137	188	0	0	0	0	0	0	0	0	0	0	0	Eukaryota	Stramenopiles	Ochrophyta	Bacillariophyta	Bacillariophyta_X	Polar-centric-Mediophyceae	Cyclotella	Cyclotella_choctawhatcheeana	Bacillariophyta (Stramenopiles)
1223	0	0	0	0	0	0	4	0	0	0	0	0	0	0	0	Eukaryota	Opisthokonta	Mesomycetozoa	Nucleariidea	Nucleariida	Nucleariida_X	Nuclearia	Nuclearia_delicatula	Flagellated cells
1224	0	0	0	0	0	0	0	17	0	0	0	0	0	0	0	Eukaryota	Rhizaria	Cercozoa	Filosa-Imbricatea	Marimonadida	Marimonadida_X	Marimonadida_XX	Marimonadida_XX_sp.	Flagellated cells
1225	0	0	0	0	18	0	0	0	0	0	0	0	0	0	0	Eukaryota	Rhizaria	Cercozoa	Filosa-Thecofilosea	Cryomonadida	Protaspa-lineage	Protaspa-lineage_X	Protaspa-lineage_X_sp.	Flagellated cells
1226	0	2	4	23	26	48	0	0	0	0	0	0	0	0	0	Eukaryota	Alveolata	Dinoflagellata	Syndiniales	Dino-Group-II	Dino-Group-II-Clade-39	Dino-Group-II-Clade-39_X	Dino-Group-II-Clade-39_X_sp.	Dinoflagellata (Alveolata)
1228	0	21	0	0	0	0	0	0	0	0	0	0	0	0	0	Eukaryota	Alveolata	Dinoflagellata	Dinophyceae	Gymnodiniales	Gymnodiniaceae	Lepidodinium	Lepidodinium_chlorophorum	Dinoflagellata (Alveolata)
1229	0	0	0	0	0	0	0	0	0	141	2	16	0	0	0	Eukaryota	Opisthokonta	Mesomycetozoa	Ichthyosporea	Ichthyosphonida	Abeoformidae_Group_MAIP_1	Abeoformidae_Group_MAIP_1_X	Abeoformidae_Group_MAIP_1_X_sp.	Flagellated cells
1230	0	6	74	201	37	9	0	0	0	0	0	0	0	0	0	Eukaryota	Archaeplastida	Chlorophyta	Palmophyllophyceae	Prasinococcales	Prasinococcales-Clade-B	Prasinococcales-Clade-B_X	Prasinococcales-Clade-B1_X_sp.	Flagellated cells
1231	68	0	0	0	0	0	0	0	0	0	0	0	0	0	0	Eukaryota	Alveolata	Dinoflagellata	Dinophyceae	Gymnodiniales	Gymnodiniaceae	Gyrodinium	Gyrodinium_fusiforme	Dinoflagellata (Alveolata)
1232	0	0	0	0	0	0	8	6	14	0	0	0	0	0	0	Eukaryota	Archaeplastida	Rhodophyta	Compsopogonophyceae	Erythropeltidales	Erythropeltidales_X	Madagascaria	Madagascaria_erythrocladioides	Flagellated cells
1233	0	0	0	0	0	0	0	0	11	0	0	0	0	0	0	Eukaryota	Rhizaria	Cercozoa	Filosa	Filosa_X	Filosa_XX	Discomonas	Discomonas_retusa	Flagellated cells
1234	0	0	0	0	0	24	0	0	0	0	0	0	0	0	0	Eukaryota	Alveolata	Dinoflagellata	Dinophyceae	Peridiniales	Protoperidiniaceae	Protoperidinium	Protoperidinium_thulesense	Dinoflagellata (Alveolata)
1235	0	0	0	0	0	0	0	23	275	8	0	69	0	0	0	Eukaryota	Rhizaria	Cercozoa	Filosa-Thecofilosea	Ebriida	TAGIRI1-lineage	TAGIRI1-lineage_X	TAGIRI1-lineage_X_sp.	Flagellated cells
1236	0	0	0	0	8	36	0	0	0	0	0	0	0	0	0	Eukaryota	Alveolata	Ciliophora	Oligohymenophorea	Apostomatia	Foettingeriidae	Synophrya	Synophrya_sp.	Ciliophora (Alveolata)
1237	0	0	0	0	0	0	5	0	0	0	0	0	0	0	0	Eukaryota	Stramenopiles	Ochrophyta	Bacillariophyta	Bacillariophyta_X	Raphid-pennate	Navicula	Navicula_lanceolata	Bacillariophyta (Stramenopiles)
1238	0	0	0	9	0	0	0	0	0	0	0	0	0	0	0	Eukaryota	Stramenopiles	Ochrophyta	Bacillariophyta	Bacillariophyta_X	Polar-centric-Mediophyceae	Skeletonema	Skeletonema_sp.	Bacillariophyta (Stramenopiles)
1239	0	0	1121	138	281	13	0	0	0	0	0	0	0	0	0	Eukaryota	Alveolata	Dinoflagellata	Syndiniales	Dino-Group-I	Dino-Group-I-Clade-4	Dino-Group-I-Clade-4_X	Dino-Group-I-Clade-4_X_sp.	Dinoflagellata (Alveolata)
1242	0	0	0	0	7	0	0	0	0	0	0	0	0	0	0	Eukaryota	Alveolata	Perkinsea	Perkinsida	Perkinsida_X	Perkinsida_XX	Perkinsus	Perkinsus_qugwadi	Flagellated cells
1243	0	0	0	0	0	0	10	0	0	0	0	0	0	0	0	Eukaryota	Rhizaria	Cercozoa	Filosa-Imbricatea	Filosa-Imbricatea_X	Novel-clade-2	Novel-clade-2_X	Novel-clade-2_X_sp.	Flagellated cells
1244	0	0	0	4	95	14	0	0	0	0	0	0	0	0	0	Eukaryota	Rhizaria	Cercozoa	Endomyxa-Phytomyxea	Phagomyxida	Phagomyxida_X	Maullinia	Maullinia_ectocarpii	Flagellated cells
1245	0	0	0	4	0	7	0	0	0	0	0	0	0	0	0	Eukaryota	Stramenopiles	Ochrophyta	Bacillariophyta	Bacillariophyta_X	Polar-centric-Mediophyceae	Biddulphia	Biddulphia_sp.	Bacillariophyta (Stramenopiles)
1246	0	0	0	0	0	0	0	0	9	0	0	0	0	0	0	Eukaryota	Rhizaria	Cercozoa	Filosa-Imbricatea	Thaumatomonadida	Thaumatomonadidae	Thaumatomastigidae	Thaumatomastigidae_sp.	Flagellated cells
1247	0	0	0	0	0	0	0	9	0	0	0	0	0	0	0	Eukaryota	Alveolata	Dinoflagellata	Syndiniales	Dino-Group-II	Dino-Group-II-Clade-57	Dino-Group-II-Clade-57_X	Dino-Group-II-Clade-57_X_sp.	Dinoflagellata (Alveolata)
1248	0	0	0	0	0	0	0	12	5	0	3	0	0	0	0	Eukaryota	Rhizaria	Cercozoa	Filosa-Thecofilosea	Ventricleftida	Ventricleftida_X	Ventricleftida_XX	Ventricleftida_XX_sp.	Flagellated cells
1249	0	0	0	4	0	7	0	0	0	0	0	0	0	0	0	Eukaryota	Alveolata	Ciliophora	Spirotrichea	Choreotrichida	Strobilidiidae_I	Pelagostrobilidium	Pelagostrobilidium_paraepacrum	Ciliophora (Alveolata)
1250	0	0	10	22	3	8	0	0	0	0	0	0	0	0	0	Eukaryota	Rhizaria	Cercozoa	Filosa-Imbricatea	Euglyphida	Paulinellidae	Paulinella	Paulinella_sp.	Flagellated cells
1252	0	0	0	0	0	0	0	0	0	31	0	0	0	0	0	Eukaryota	Rhizaria	Cercozoa	Filosa-Thecofilosea	Ventricleftida	CCW10-lineage	CCW10-lineage_X	CCW10-lineage_X_sp.	Flagellated cells
1254	0	0	0	6	0	0	0	0	0	0	0	0	0	0	0	Eukaryota	Hacrobia	Cryptophyta	Cryptophyceae	Cryptomonadales	Cryptomonadales_X	Rhodomonas	Rhodomonas_sp.	Flagellated cells
1255	0	0	0	0	0	0	0	19	0	0	0	0	0	0	0	Eukaryota	Rhizaria	Cercozoa	Filosa-Thecofilosea	Ventricleftida	Ventricleftida_X	Ventricleftida_XX	Ventricleftida_XX_sp.	Flagellated cells
1256	0	0	0	0	0	0	24	0	0	0	0	0	0	0	0	Eukaryota	Alveolata	Ciliophora	Oligohymenophorea	Apostomatia	Foettingeriidae	Vampyrophrya	Vampyrophrya_pelagica	Ciliophora (Alveolata)
1257	0	0	0	0	0	13	0	0	0	0	0	0	0	0	0	Eukaryota	Rhizaria	Cercozoa	Filosa-Thecofilosea	Ventricleftida	CCW10-lineage	CCW10-lineage_X	CCW10-lineage_X_sp.	Flagellated cells
1262	0	0	0	0	0	0	0	0	0	0	0	0	191	0	0	Eukaryota	Stramenopiles	Opalozoa	Bicoecea	Bicoecales	Bicoecaceae	Bicoecaceae_X	Bicoecaceae_X_sp.	Bacillariophyta (Stramenopiles)
1263	0	0	0	0	0	0	0	0	0	0	0	9	49	6	0	Eukaryota	Rhizaria	Cercozoa	Filosa-Thecofilosea	Cryomonadida	Protaspa-lineage	Protaspa	Protaspa_grandis	Flagellated cells
1264	0	0	0	0	0	0	0	0	0	0	4	2	1	2	0	Eukaryota	Rhizaria	Cercozoa	Filosa-Imbricatea	Filosa-Imbricatea_X	Novel-clade-2	Novel-clade-2_X	Novel-clade-2_X_sp.	Flagellated cells
1265	0	0	11	4	0	0	0	0	0	0	0	0	0	0	0	Eukaryota	Rhizaria	Cercozoa	Filosa-Imbricatea	Marimonadida	Marimonadida_X	Pseudopirsonia	Pseudopirsonia_mucosa	Flagellated cells
1268	0	0	0	0	0	0	212	39	64	15	77	13	0	7	9	Eukaryota	Alveolata	Ciliophora	Spirotrichea	Choreotrichida	Leegaardiellidae_B	Leegaardiella	Leegaardiella_sp.	Ciliophora (Alveolata)
1269	0	0	0	30	23	6	0	0	0	0	0	0	0	0	0	Eukaryota	Alveolata	Dinoflagellata	Dinophyceae	Gymnodiniales	Gymnodiniaceae	Gymnodinium	Gymnodinium_dorsalisulcum	Dinoflagellata (Alveolata)
1270	0	0	0	0	0	0	0	0	6	0	0	0	0	0	0	Eukaryota	Rhizaria	Cercozoa	Cercozoa_X	Cercozoa_XX	Cercozoa_XXX	Cercozoa_XXXX	Cercozoa_XXXX_sp.	Flagellated cells
1271	0	0	0	0	0	0	25	0	0	0	0	0	0	0	0	Eukaryota	Alveolata	Dinoflagellata	Syndiniales	Dino-Group-II	Dino-Group-II-Clade-14	Dino-Group-II-Clade-14_X	Dino-Group-II-Clade-14_X_sp.	Dinoflagellata (Alveolata)
1272	0	0	0	0	0	0	0	0	0	11	0	0	0	0	0	Eukaryota	Rhizaria	Cercozoa	Filosa-Thecofilosea	Filosa-Thecofilosea_X	Mataza-lineage	Mataza	Mataza_hastifera	Flagellated cells
1273	0	0	38	19	0	0	0	0	0	0	0	0	0	0	0	Eukaryota	Rhizaria	Cercozoa	Filosa-Thecofilosea	Ebriida	TAGIRI1-lineage	TAGIRI1-lineage_X	TAGIRI1-lineage_X_sp.	Flagellated cells
1274	0	0	0	0	0	0	0	0	7	0	0	0	0	0	0	Eukaryota	Archaeplastida	Streptophyta	Embryophyceae	Embryophyceae_X	Embryophyceae_XX	Ceratodon	Ceratodon_purpureus	Flagellated cells
1275	0	0	0	0	0	0	7	29	187	0	5	0	0	0	0	Eukaryota	Stramenopiles	Ochrophyta	Bacillariophyta	Bacillariophyta_X	Raphid-pennate	Navicula	Navicula_sp.	Bacillariophyta (Stramenopiles)
1276	0	0	0	0	0	16	0	0	0	0	0	0	0	0	0	Eukaryota	Rhizaria	Cercozoa	Filosa-Thecofilosea	Ventricleftida	Ventricleftida_X	Ventricleftida_XX	Ventricleftida_XX_sp.	Flagellated cells
1278	0	15	18	119	0	0	0	0	0	0	0	0	0	0	0	Eukaryota	Alveolata	Dinoflagellata	Dinophyceae	Dinophyceae_X	Tovelliaceae	Woloszynskia	Woloszynskia_sp.	Dinoflagellata (Alveolata)
1279	0	0	0	0	0	0	19	0	0	0	0	0	0	0	0	Eukaryota	Alveolata	Dinoflagellata	Syndiniales	Dino-Group-II	Dino-Group-II-Clade-1	Dino-Group-II-Clade-1_X	Dino-Group-II-Clade-1_X_sp.	Dinoflagellata (Alveolata)
1280	0	0	0	5	0	8	0	0	0	0	0	0	0	0	0	Eukaryota	Alveolata	Dinoflagellata	Dinophyceae	Dinophyceae_X	Dinophyceae_XX	Dinophyceae_XXX	Dinophyceae_XXX_sp.	Dinoflagellata (Alveolata)
1282	0	118	82	75	0	0	0	0	0	0	0	0	0	0	0	Eukaryota	Alveolata	Dinoflagellata	Dinophyceae	Dinophysiales	Amphisoleniaceae	Amphisoleniaceae_X	Amphisoleniaceae_X_sp.	Dinoflagellata (Alveolata)
1284	0	0	0	0	0	0	0	73	0	0	0	0	0	0	0	Eukaryota	Alveolata	Dinoflagellata	Dinophyceae	Dinophyceae_X	Dinophyceae_XX	Dinophyceae_XXX	Dinophyceae_XXX_sp.	Dinoflagellata (Alveolata)
1285	0	0	0	0	0	0	58	0	0	0	0	0	0	0	0	Eukaryota	Rhizaria	Cercozoa	Filosa-Imbricatea	Filosa-Imbricatea_X	Novel-clade-2	Novel-clade-2_X	Novel-clade-2_X_sp.	Flagellated cells
1286	14	0	11	12	14	2	0	0	0	0	0	0	0	0	0	Eukaryota	Stramenopiles	Ochrophyta	Bacillariophyta	Bacillariophyta_X	Polar-centric-Mediophyceae	Thalassiosira	Thalassiosira_sp.	Bacillariophyta (Stramenopiles)
1288	0	0	0	0	0	0	0	0	35	63	13	48	2	0	0	Eukaryota	Rhizaria	Cercozoa	Filosa-Thecofilosea	Filosa-Thecofilosea_X	Mataza-lineage	Mataza-lineage_X	Mataza-lineage_X_sp.	Flagellated cells
1289	0	0	4	0	0	0	0	0	0	0	0	0	0	0	0	Eukaryota	Alveolata	Apicomplexa	Apicomplexa_X	Apicomplexa_XX	Apicomplexa_XXX	Apicomplexa_XXXX	Apicomplexa_XXXX_sp.	Flagellated cells
1290	0	0	0	0	0	0	0	0	0	0	0	0	0	0	42	Eukaryota	Stramenopiles	Opalozoa	Bicoecea	Bicoecales	Bicoecaceae	Bicoecaceae_X	Bicoecaceae_X_sp.	Bacillariophyta (Stramenopiles)
1291	0	0	25	0	0	0	0	0	0	0	0	0	0	0	0	Eukaryota	Rhizaria	Cercozoa	Filosa-Thecofilosea	Ebriida	TAGIRI1-lineage	TAGIRI1-lineage_X	TAGIRI1-lineage_X_sp.	Flagellated cells
1292	0	0	6	0	0	0	0	0	0	0	0	0	0	0	0	Eukaryota	Alveolata	Dinoflagellata	Dinophyceae	Dinophyceae_X	Dinophyceae_XX	Dinophyceae_XXX	Dinophyceae_XXX_sp.	Dinoflagellata (Alveolata)
1293	0	0	0	2	0	24	0	0	0	0	0	0	0	0	0	Eukaryota	Alveolata	Ciliophora	Spirotrichea	Choreotrichida	Strombidinopsidae	Strombidinopsis	Strombidinopsis_acuminata	Ciliophora (Alveolata)
1294	0	0	0	0	0	0	0	0	7	6	0	0	0	0	0	Eukaryota	Rhizaria	Cercozoa	Filosa-Thecofilosea	Cryomonadida	Protaspa-lineage	Protaspa-lineage_X	Protaspa-lineage_X_sp.	Flagellated cells
1295	0	0	0	0	0	0	24	16	0	0	0	0	0	0	0	Eukaryota	Alveolata	Dinoflagellata	Syndiniales	Dino-Group-II	Dino-Group-II-Clade-5	Dino-Group-II-Clade-5_X	Dino-Group-II-Clade-5_X_sp.	Dinoflagellata (Alveolata)
1296	6	0	0	0	0	57	0	0	0	0	0	0	0	0	0	Eukaryota	Alveolata	Ciliophora	Spirotrichea	Strombidiida_F	Strombidiida_F_X	Strombidiida_F_XX	Strombidiida_F_XX_sp.	Ciliophora (Alveolata)
1297	0	0	2	2	27	0	0	0	0	0	0	0	0	0	0	Eukaryota	Alveolata	Dinoflagellata	Syndiniales	Dino-Group-I	Dino-Group-I-Clade-4	Euduboscquella	Euduboscquella_cachoni	Dinoflagellata (Alveolata)
1298	0	0	0	0	0	0	12	93	34	0	64	46	0	1450	32	Eukaryota	Stramenopiles	Ochrophyta	Bacillariophyta	Bacillariophyta_X	Polar-centric-Mediophyceae	Thalassiosira	Thalassiosira_tenera	Bacillariophyta (Stramenopiles)
1299	0	0	11	3	0	0	0	0	0	0	0	0	0	0	0	Eukaryota	Alveolata	Ciliophora	Phyllopharyngea	Cyrtophoria_1	PHYLL_4	PHYLL_4_X	PHYLL_4_X_sp.	Ciliophora (Alveolata)
1300	0	0	0	0	0	0	51	0	53	11	16	0	0	0	0	Eukaryota	Stramenopiles	Ochrophyta	Bacillariophyta	Bacillariophyta_X	Polar-centric-Mediophyceae	Skeletonema	Skeletonema_dohrnii	Bacillariophyta (Stramenopiles)
1301	0	0	0	0	0	0	0	0	0	42	0	0	0	0	0	Eukaryota	Hacrobia	Haptophyta	Prymnesiophyceae	Prymnesiales	Prymnesiaceae	Haptolina	Haptolina_sp.	Flagellated cells
1302	0	0	0	0	0	0	0	0	0	0	0	6	0	0	0	Eukaryota	Archaeplastida	Streptophyta	Embryophyceae	Embryophyceae_X	Embryophyceae_XX	Citrus	Citrus_sp.	Flagellated cells
1303	0	17	0	15	0	0	0	0	0	0	0	0	0	0	0	Eukaryota	Alveolata	Ciliophora	Spirotrichea	Choreotrichida	Strombidinopsidae	Strombidinopsis	Strombidinopsis_acuminata	Ciliophora (Alveolata)
1304	0	0	0	0	0	0	2	0	0	0	0	0	0	0	0	Eukaryota	Rhizaria	Cercozoa	Filosa-Imbricatea	Marimonadida	Marimonadida_X	Marimonadida_XX	Marimonadida_XX_sp.	Flagellated cells
1305	0	0	0	0	0	0	0	0	0	0	0	0	0	7	0	Eukaryota	Alveolata	Dinoflagellata	Dinophyceae	Suessiales	Suessiaceae	Protodinium	Protodinium_simplex	Dinoflagellata (Alveolata)
1306	0	0	0	0	0	0	8	0	0	0	0	0	0	0	0	Eukaryota	Archaeplastida	Chlorophyta	Palmophyllophyceae	Prasinococcales	Prasinococcales-Clade-B	Prasinococcales-Clade-B_X	Prasinococcales-Clade-B1_X_sp.	Flagellated cells
1307	0	0	0	0	0	0	0	0	0	0	0	34	0	0	0	Eukaryota	Alveolata	Dinoflagellata	Syndiniales	Dino-Group-I	Dino-Group-I-Clade-4	Euduboscquella	Euduboscquella_crenulata	Dinoflagellata (Alveolata)
1308	0	0	0	0	0	0	0	0	0	28	0	0	0	0	0	Eukaryota	Rhizaria	Cercozoa	Filosa-Thecofilosea	Cryomonadida	Cryomonadida_X	Cryomonadida_XX	Cryomonadida_XX_sp.	Flagellated cells
1309	0	0	0	0	0	0	0	0	0	0	0	0	0	0	40	Eukaryota	Stramenopiles	Opalozoa	Bicoecea	Bicoecales	Bicoecaceae	Bicoecaceae_X	Bicoecaceae_X_sp.	Bacillariophyta (Stramenopiles)
1310	15	4	0	0	0	0	0	0	0	0	0	0	0	0	0	Eukaryota	Alveolata	Dinoflagellata	Syndiniales	Dino-Group-I	Dino-Group-I-Clade-4	Euduboscquella	Euduboscquella_crenulata	Dinoflagellata (Alveolata)
1311	0	0	0	0	0	0	0	0	0	0	0	0	0	9	0	Eukaryota	Rhizaria	Cercozoa	Filosa-Thecofilosea	Ventricleftida	CCW10-lineage	CCW10-lineage_X	CCW10-lineage_X_sp.	Flagellated cells
1312	0	0	0	0	0	0	1061	634	137	48	20	9	0	0	0	Eukaryota	Alveolata	Dinoflagellata	Syndiniales	Dino-Group-I	Dino-Group-I-Clade-4	Dino-Group-I-Clade-4_X	Dino-Group-I-Clade-4_X_sp.	Dinoflagellata (Alveolata)
1314	0	0	0	0	0	0	16	30	38	0	10	0	0	0	0	Eukaryota	Rhizaria	Cercozoa	Filosa-Thecofilosea	Ventricleftida	CCW10-lineage	CCW10-lineage_X	CCW10-lineage_X_sp.	Flagellated cells
1315	0	0	0	11	0	0	0	0	0	0	0	0	0	0	0	Eukaryota	Alveolata	Dinoflagellata	Dinophyceae	Peridiniales	Thoracosphaeraceae	Thoracosphaeraceae_X	Thoracosphaeraceae_X_sp.	Dinoflagellata (Alveolata)
1316	0	0	0	0	0	0	0	0	5	0	3	0	0	0	0	Eukaryota	Stramenopiles	Ochrophyta	Bacillariophyta	Bacillariophyta_X	Polar-centric-Mediophyceae	Extubocellulus	Extubocellulus_spinifer	Bacillariophyta (Stramenopiles)
1317	0	0	0	0	0	13	0	0	0	0	0	0	0	0	0	Eukaryota	Alveolata	Dinoflagellata	Dinophyceae	Peridiniales	Heterocapsaceae	Heterocapsa	Heterocapsa_sp.	Dinoflagellata (Alveolata)
1318	0	0	6	72	0	33	0	0	0	0	0	0	0	0	0	Eukaryota	Alveolata	Dinoflagellata	Dinophyceae	Gymnodiniales	Gymnodiniaceae	Akashiwo	Akashiwo_sanguinea	Dinoflagellata (Alveolata)
1319	0	0	0	0	0	0	18	113	156	0	89	6	0	17	0	Eukaryota	Hacrobia	Cryptophyta	Cryptophyceae	Cryptomonadales	Cryptomonadales_X	Teleaulax	Teleaulax_acuta	Flagellated cells
1320	0	0	0	0	0	0	0	0	0	0	0	0	0	0	16	Eukaryota	Hacrobia	Haptophyta	Prymnesiophyceae	Prymnesiales	Chrysochromulinaceae	Chrysochromulina	Chrysochromulina_rotalis	Flagellated cells
1321	0	13	0	0	0	15	0	0	0	0	0	0	0	0	0	Eukaryota	Stramenopiles	Ochrophyta	Bacillariophyta	Bacillariophyta_X	Radial-centric-basal-Coscinodiscophyceae	Rhizosolenia	Rhizosolenia_robusta	Bacillariophyta (Stramenopiles)
1322	0	0	0	0	0	0	0	56	0	0	0	0	0	0	0	Eukaryota	Stramenopiles	Opalozoa	MAST-3	MAST-3C	MAST-3C_X	MAST-3C_XX	MAST-3C_XX_sp.	Bacillariophyta (Stramenopiles)
1323	0	0	0	0	0	0	6	6	0	0	0	0	0	0	0	Eukaryota	Alveolata	Dinoflagellata	Dinophyceae	Peridiniales	Thoracosphaeraceae	Thoracosphaeraceae_X	Thoracosphaeraceae_X_sp.	Dinoflagellata (Alveolata)
1324	0	0	0	0	0	0	0	0	0	0	32	0	0	0	0	Eukaryota	Alveolata	Ciliophora	Spirotrichea	Hypotrichia	Hypotrichia_X	Hypotrichia_XX	Hypotrichia_XX_sp.	Ciliophora (Alveolata)
1326	0	0	0	0	0	0	11	0	0	0	0	0	0	0	0	Eukaryota	Rhizaria	Cercozoa	Filosa-Thecofilosea	Cryomonadida	Protaspa-lineage	Protaspa-lineage_X	Protaspa-lineage_X_sp.	Flagellated cells
1328	0	0	5	6	0	0	0	0	0	0	0	0	0	0	0	Eukaryota	Archaeplastida	Chlorophyta	Palmophyllophyceae	Prasinococcales	Prasinococcales-Clade-B	Prasinoderma	Prasinoderma_coloniale	Flagellated cells
1329	0	0	0	0	0	0	0	31	14	0	0	0	0	0	0	Eukaryota	Alveolata	Dinoflagellata	Dinophyceae	Peridiniales	Amphidomataceae	Azadinium	Azadinium_obesum	Dinoflagellata (Alveolata)
1330	0	0	0	0	0	0	10	0	0	0	0	0	0	0	0	Eukaryota	Alveolata	Ciliophora	Spirotrichea	Strombidiida	Strombidiidae	Varistrombidium	Varistrombidium_kielum	Ciliophora (Alveolata)
1333	0	0	0	0	0	0	0	0	0	0	0	0	3	13	0	Eukaryota	Alveolata	Ciliophora	Spirotrichea	Choreotrichida	Strombidinopsidae	Strombidinopsis	Strombidinopsis_sp.	Ciliophora (Alveolata)
1334	0	0	0	0	0	0	56	0	0	0	0	0	0	0	0	Eukaryota	Hacrobia	Telonemia	Telonemia_X	Telonemia_XX	Telonemia-Group-2	Telonemia-Group-2_X	Telonemia-Group-2_X_sp.	Flagellated cells
1335	0	0	0	0	0	0	0	0	0	0	0	7	0	0	31	Eukaryota	Stramenopiles	Opalozoa	Bicoecea	Bicoecales	Bicoecaceae	Bicoecaceae_X	Bicoecaceae_X_sp.	Bacillariophyta (Stramenopiles)
1336	53	45	3	587	0	8	0	0	0	0	0	0	0	0	0	Eukaryota	Alveolata	Dinoflagellata	Dinophyceae	Dinophyceae_X	Dinophyceae_XX	Dinophyceae_XXX	Dinophyceae_XXX_sp.	Dinoflagellata (Alveolata)
1337	0	0	0	0	0	0	28	0	0	0	0	0	0	0	0	Eukaryota	Alveolata	Dinoflagellata	Syndiniales	Dino-Group-II	Dino-Group-II-Clade-1	Dino-Group-II-Clade-1_X	Dino-Group-II-Clade-1_X_sp.	Dinoflagellata (Alveolata)
1340	0	0	0	2	17	9	0	0	0	0	0	0	0	0	0	Eukaryota	Alveolata	Dinoflagellata	Dinophyceae	Gymnodiniales	Gymnodiniaceae	Gyrodinium	Gyrodinium_sp.	Dinoflagellata (Alveolata)
1341	0	0	0	0	0	0	0	0	49	0	0	0	0	0	0	Eukaryota	Alveolata	Dinoflagellata	Syndiniales	Dino-Group-II	Dino-Group-II-Clade-3	Dino-Group-II-Clade-3_X	Dino-Group-II-Clade-3_X_sp.	Dinoflagellata (Alveolata)
1342	0	0	0	0	0	0	0	0	0	0	0	0	0	0	38	Eukaryota	Stramenopiles	Opalozoa	Bicoecea	Bicoecales	Bicoecaceae	Bicoecaceae_X	Bicoecaceae_X_sp.	Bacillariophyta (Stramenopiles)
1343	0	0	0	21	0	54	0	0	0	0	0	0	0	0	0	Eukaryota	Alveolata	Dinoflagellata	Dinophyceae	Dinophyceae_X	Dinophyceae_XX	Dinophyceae_XXX	Dinophyceae_XXX_sp.	Dinoflagellata (Alveolata)
1344	0	0	0	0	0	0	0	0	0	0	2	0	0	3	0	Eukaryota	Rhizaria	Cercozoa	Filosa-Imbricatea	Thaumatomonadida	Thaumatomonadidae	Reckertia	Reckertia_filosa	Flagellated cells
1345	0	0	0	0	0	0	100	602	510	227	244	0	12	46	82	Eukaryota	Alveolata	Dinoflagellata	Dinophyceae	Gymnodiniales	Gymnodiniaceae	Gyrodinium	Gyrodinium_dominans	Dinoflagellata (Alveolata)
1346	0	0	0	0	0	0	0	0	0	0	0	4	0	121	0	Eukaryota	Opisthokonta	Mesomycetozoa	Ichthyosporea	Ichthyosphonida	Abeoformidae_Group_MAIP_1	Abeoformidae_Group_MAIP_1_X	Abeoformidae_Group_MAIP_1_X_sp.	Flagellated cells
1350	0	0	0	10	0	9	0	0	0	0	0	0	0	0	0	Eukaryota	Archaeplastida	Rhodophyta	Compsopogonophyceae	Erythropeltidales	Erythropeltidales_X	Madagascaria	Madagascaria_erythrocladioides	Flagellated cells
1351	0	0	0	0	0	0	0	7	0	0	0	0	0	0	0	Eukaryota	Rhizaria	Cercozoa	Filosa-Thecofilosea	Ebriida	Botuliformidae	Botuliforma	Botuliforma_benthica	Flagellated cells
1352	0	0	0	5	0	6	0	0	0	0	0	0	0	0	0	Eukaryota	Archaeplastida	Rhodophyta	Compsopogonophyceae	Erythropeltidales	Erythropeltidales_X	Madagascaria	Madagascaria_erythrocladioides	Flagellated cells
1354	0	0	0	59	157	210	0	0	0	0	0	0	0	0	0	Eukaryota	Stramenopiles	Ochrophyta	Bacillariophyta	Bacillariophyta_X	Polar-centric-Mediophyceae	Thalassiosira	Thalassiosira_anguste-lineata	Bacillariophyta (Stramenopiles)
1355	0	0	0	22	0	0	0	0	0	0	0	0	0	0	0	Eukaryota	Stramenopiles	Opalozoa	Bicoecea	Bicoecales	Bicoecaceae	Bicoecaceae_X	Bicoecaceae_X_sp.	Bacillariophyta (Stramenopiles)
1356	14	0	0	0	0	0	0	0	0	0	0	0	0	0	0	Eukaryota	Alveolata	Dinoflagellata	Dinophyceae	Dinophyceae_X	Dinophyceae_XX	Dinophyceae_XXX	Dinophyceae_XXX_sp.	Dinoflagellata (Alveolata)
1357	0	0	0	0	0	0	3	3	0	0	0	0	0	0	0	Eukaryota	Stramenopiles	Ochrophyta	Bacillariophyta	Bacillariophyta_X	Polar-centric-Mediophyceae	Papiliocellulus	Papiliocellulus_simplex	Bacillariophyta (Stramenopiles)
1358	0	0	0	0	0	0	0	0	0	0	0	0	0	0	15	Eukaryota	Alveolata	Ciliophora	Phyllopharyngea	Cyrtophoria_1	Pithitidae	Pithites	Pithites_vorax	Ciliophora (Alveolata)
1361	0	0	0	0	0	0	7	0	0	0	0	0	0	0	0	Eukaryota	Alveolata	Dinoflagellata	Syndiniales	Dino-Group-II	Dino-Group-II-Clade-4	Dino-Group-II-Clade-4_X	Dino-Group-II-Clade-4_X_sp.	Dinoflagellata (Alveolata)
1362	0	0	0	0	0	0	0	9	0	0	0	0	0	0	0	Eukaryota	Archaeplastida	Chlorophyta	Palmophyllophyceae	Prasinococcales	Prasinococcales-Clade-B	Prasinoderma	Prasinoderma_coloniale	Flagellated cells
1363	0	0	0	0	0	0	0	0	0	0	13	0	0	0	0	Eukaryota	Stramenopiles	Ochrophyta	Bacillariophyta	Bacillariophyta_X	Polar-centric-Mediophyceae	Thalassiosira	Thalassiosira_pseudonana	Bacillariophyta (Stramenopiles)
1365	0	0	26	0	0	0	0	0	0	0	0	0	0	0	0	Eukaryota	Alveolata	Dinoflagellata	Syndiniales	Dino-Group-II	Dino-Group-II-Clade-1	Dino-Group-II-Clade-1_X	Dino-Group-II-Clade-1_X_sp.	Dinoflagellata (Alveolata)
1366	0	1	3	11	1	26	0	0	0	0	0	0	0	0	0	Eukaryota	Alveolata	Dinoflagellata	Syndiniales	Dino-Group-II	Dino-Group-II-Clade-17	Dino-Group-II-Clade-17_X	Dino-Group-II-Clade-17_X_sp.	Dinoflagellata (Alveolata)
1367	0	0	0	0	0	0	34	0	0	5	0	0	0	0	0	Eukaryota	Stramenopiles	Ochrophyta	Bacillariophyta	Bacillariophyta_X	Polar-centric-Mediophyceae	Cyclotella	Cyclotella_choctawhatcheeana	Bacillariophyta (Stramenopiles)
1368	0	0	0	0	0	0	0	0	0	0	0	0	0	0	11	Eukaryota	Alveolata	Dinoflagellata	Dinophyceae	Dinophyceae_X	Dinophyceae_XX	Dinophyceae_XXX	Dinophyceae_XXX_sp.	Dinoflagellata (Alveolata)
1370	0	9	0	0	0	29	0	0	0	0	0	0	0	0	0	Eukaryota	Hacrobia	Telonemia	Telonemia_X	Telonemia_XX	Telonemia-Group-2	Telonemia-Group-2_X	Telonemia-Group-2_X_sp.	Flagellated cells
1371	0	0	0	62	0	105	0	0	0	0	0	0	0	0	0	Eukaryota	Stramenopiles	Ochrophyta	Bacillariophyta	Bacillariophyta_X	Polar-centric-Mediophyceae	Thalassiosira	Thalassiosira_punctigera	Bacillariophyta (Stramenopiles)
1372	0	23	90	73	82	79	0	0	0	0	0	0	0	0	0	Eukaryota	Alveolata	Dinoflagellata	Dinophyceae	Peridiniales	Thoracosphaeraceae	Stoeckeria	Stoeckeria_algicida	Dinoflagellata (Alveolata)
1373	0	0	0	0	0	0	0	28	13	0	6	0	0	0	0	Eukaryota	Rhizaria	Cercozoa	Filosa-Thecofilosea	Cryomonadida	Protaspa-lineage	Protaspa	Protaspa_grandis	Flagellated cells
1374	0	0	0	0	0	0	0	30	73	0	0	45	0	29	42	Eukaryota	Alveolata	Dinoflagellata	Dinophyceae	Dinophysiales	Amphisoleniaceae	Amphisoleniaceae_X	Amphisoleniaceae_X_sp.	Dinoflagellata (Alveolata)
1375	0	0	0	0	0	0	0	0	15	0	2	0	0	0	0	Eukaryota	Alveolata	Ciliophora	Spirotrichea	Strombidiida	Strombidiidae_B	Strombidiidae_B_X	Strombidiidae_B_X_sp.	Ciliophora (Alveolata)
1376	0	0	0	18	0	0	0	0	0	0	0	0	0	0	0	Eukaryota	Stramenopiles	Ochrophyta	Bacillariophyta	Bacillariophyta_X	Raphid-pennate	Cymbella	Cymbella_similis	Bacillariophyta (Stramenopiles)
1377	0	0	0	0	0	0	8	0	12	0	0	0	0	10	0	Eukaryota	Rhizaria	Cercozoa	Filosa-Thecofilosea	Filosa-Thecofilosea_X	Mataza-lineage	Mataza-lineage_X	Mataza-lineage_X_sp.	Flagellated cells
1378	0	0	0	0	0	0	0	0	0	0	0	11	115	122	32	Eukaryota	Alveolata	Dinoflagellata	Dinophyceae	Gymnodiniales	Gymnodiniaceae	Gymnodinium	Gymnodinium_sp.	Dinoflagellata (Alveolata)
1379	0	0	0	0	0	0	17	290	487	10	32	0	0	0	0	Eukaryota	Alveolata	Ciliophora	Spirotrichea	Tintinnida	TIN_04	Tintinnopsis_04	Tintinnopsis_parvula	Ciliophora (Alveolata)
1380	0	0	0	0	0	0	0	0	41	0	0	0	0	0	0	Eukaryota	Alveolata	Dinoflagellata	Dinophyceae	Gymnodiniales	Gymnodiniaceae	Polykrikos	Polykrikos_geminatus	Dinoflagellata (Alveolata)
1381	0	0	0	0	0	0	31	8	0	0	0	0	0	0	0	Eukaryota	Alveolata	Dinoflagellata	Syndiniales	Dino-Group-II	Dino-Group-II-Clade-3	Dino-Group-II-Clade-3_X	Dino-Group-II-Clade-3_X_sp.	Dinoflagellata (Alveolata)
1382	0	0	0	0	0	0	0	0	0	19	0	0	0	0	0	Eukaryota	Rhizaria	Cercozoa	Filosa-Thecofilosea	Cryomonadida	Cryomonadida_X	Cryomonadida_XX	Cryomonadida_XX_sp.	Flagellated cells
1383	0	0	0	0	0	0	0	0	7	45	0	17	0	5	0	Eukaryota	Rhizaria	Cercozoa	Filosa-Imbricatea	Filosa-Imbricatea_X	Novel-clade-2	Novel-clade-2_X	Novel-clade-2_X_sp.	Flagellated cells
1385	0	4	0	7	8	112	0	0	0	0	0	0	0	0	0	Eukaryota	Hacrobia	Cryptophyta	Cryptophyceae	Cryptomonadales	Cryptomonadales_X	Cryptomonadales_XX	Cryptomonadales_XX_sp.	Flagellated cells
1386	0	0	0	0	0	58	0	0	0	0	0	0	0	0	0	Eukaryota	Opisthokonta	Choanoflagellida	Choanoflagellatea	Choanoflagellatea_X	Choanoflagellatea_X_Group_L	Choanoflagellatea_X_Group_L_X	Choanoflagellatea_X_Group_L_X_sp.	Flagellated cells
1387	0	0	6	0	0	0	0	0	0	0	0	0	0	0	0	Eukaryota	Rhizaria	Cercozoa	Filosa-Imbricatea	Filosa-Imbricatea_X	Novel-clade-2	Novel-clade-2_X	Novel-clade-2_X_sp.	Flagellated cells
1388	0	0	0	0	0	7	0	0	0	0	0	0	0	0	0	Eukaryota	Stramenopiles	Opalozoa	MAST-3	MAST-3A	MAST-3A_X	MAST-3A_XX	MAST-3A_XX_sp.	Bacillariophyta (Stramenopiles)
1389	0	0	0	0	0	0	0	30	32	0	39	0	0	25	0	Eukaryota	Alveolata	Ciliophora	Spirotrichea	Strombidiida	Strombidiidae_R	Strombidium_R	Strombidium_R_sp.	Ciliophora (Alveolata)
1390	0	0	0	0	0	4	0	0	0	0	0	0	0	0	0	Eukaryota	Alveolata	Dinoflagellata	Syndiniales	Dino-Group-II	Dino-Group-II-Clade-3	Dino-Group-II-Clade-3_X	Dino-Group-II-Clade-3_X_sp.	Dinoflagellata (Alveolata)
1391	0	0	0	0	0	0	0	0	0	0	9	0	0	0	0	Eukaryota	Hacrobia	Cryptophyta	Cryptophyceae	Cryptomonadales	Cryptomonadales_X	Plagioselmis	Plagioselmis_prolonga	Flagellated cells
1392	0	0	0	0	0	0	0	0	0	0	63	0	0	0	0	Eukaryota	Stramenopiles	Ochrophyta	Bacillariophyta	Bacillariophyta_X	Polar-centric-Mediophyceae	Stephanodiscus	Stephanodiscus_hantzschii	Bacillariophyta (Stramenopiles)
1393	0	0	0	0	10	0	0	0	0	0	0	0	0	0	0	Eukaryota	Alveolata	Dinoflagellata	Syndiniales	Dino-Group-II	Dino-Group-II-Clade-17	Dino-Group-II-Clade-17_X	Dino-Group-II-Clade-17_X_sp.	Dinoflagellata (Alveolata)
1395	0	0	0	17	0	31	0	0	0	0	0	0	0	0	0	Eukaryota	Alveolata	Dinoflagellata	Dinophyceae	Dinophyceae_X	Dinophyceae_XX	Dinophyceae_XXX	Dinophyceae_XXX_sp.	Dinoflagellata (Alveolata)
1396	0	3	2	12	2	7	0	0	0	0	0	0	0	0	0	Eukaryota	Stramenopiles	Ochrophyta	Bacillariophyta	Bacillariophyta_X	Polar-centric-Mediophyceae	Eucampia	Eucampia_sp.	Bacillariophyta (Stramenopiles)
1397	0	0	0	0	0	0	21	0	0	0	0	0	0	0	0	Eukaryota	Hacrobia	Haptophyta	Prymnesiophyceae	Prymnesiophyceae_Clade_D	Prymnesiophyceae_Clade_D_X	Prymnesiophyceae_Clade_D_XX	Prymnesiophyceae_Clade_D_XX_sp.	Flagellated cells
1398	0	0	0	0	0	0	1	0	0	0	0	0	0	0	9	Eukaryota	Rhizaria	Cercozoa	Filosa-Imbricatea	Marimonadida	Marimonadida_X	Marimonadida_XX	Marimonadida_XX_sp.	Flagellated cells
1400	0	0	0	0	0	0	18	0	0	0	0	0	0	0	0	Eukaryota	Hacrobia	Telonemia	Telonemia_X	Telonemia_XX	Telonemia-Group-2	Telonemia-Group-2_X	Telonemia-Group-2_X_sp.	Flagellated cells
1401	46	0	2	0	0	0	0	0	0	0	0	0	0	0	0	Eukaryota	Alveolata	Apicomplexa	Gregarinomorphea	Gregarines	Gregarines_X	Selenidium1	Selenidium1_serpulae	Flagellated cells
1402	0	0	0	0	0	0	0	0	0	0	0	0	1	8	22	Eukaryota	Alveolata	Ciliophora	CONThreeP	CONThreeP_X	CONThreeP_XX	Askenasia	Askenasia_sp.	Ciliophora (Alveolata)
1403	0	0	0	0	0	0	0	0	0	0	0	11	0	0	0	Eukaryota	Rhizaria	Cercozoa	Filosa-Thecofilosea	Ebriida	Ebriida_X	Ebriida_XX	Ebriida_XX_sp.	Flagellated cells
1404	0	0	0	7	3	0	0	0	0	0	0	0	0	0	0	Eukaryota	Stramenopiles	Ochrophyta	Bacillariophyta	Bacillariophyta_X	Raphid-pennate	Navicula	Navicula_sp.	Bacillariophyta (Stramenopiles)
1405	0	0	0	0	0	0	0	0	0	0	0	0	9	0	0	Eukaryota	Stramenopiles	Opalozoa	Bicoecea	Bicoecales	Bicoecaceae	Bicoecaceae_X	Bicoecaceae_X_sp.	Bacillariophyta (Stramenopiles)
1406	0	0	89	60	0	0	0	0	0	0	0	0	0	0	0	Eukaryota	Alveolata	Dinoflagellata	Dinophyceae	Peridiniales	Thoracosphaeraceae	Pentapharsodinium	Pentapharsodinium_tyrrhenicum	Dinoflagellata (Alveolata)
1407	0	0	0	0	0	25	0	0	0	0	0	0	0	0	0	Eukaryota	Alveolata	Dinoflagellata	Syndiniales	Dino-Group-II	Dino-Group-II-Clade-4	Dino-Group-II-Clade-4_X	Dino-Group-II-Clade-4_X_sp.	Dinoflagellata (Alveolata)
1408	0	0	0	0	0	0	0	6	0	0	0	0	0	0	0	Eukaryota	Rhizaria	Cercozoa	Cercozoa_X	Cercozoa_XX	Cercozoa_XXX	Cercozoa_XXXX	Cercozoa_XXXX_sp.	Flagellated cells
1409	0	0	0	0	0	0	7	0	0	0	0	0	0	18	0	Eukaryota	Rhizaria	Cercozoa	Filosa-Thecofilosea	Ventricleftida	Ventrifissuridae	Ventrifissuridae_X	Ventrifissuridae_X_sp.	Flagellated cells
1413	0	0	0	0	0	46	0	0	0	0	0	0	0	0	0	Eukaryota	Alveolata	Dinoflagellata	Syndiniales	Dino-Group-II	Dino-Group-II-Clade-13	Dino-Group-II-Clade-13_X	Dino-Group-II-Clade-13_X_sp.	Dinoflagellata (Alveolata)
1414	0	0	1	2	0	0	0	0	0	0	0	0	0	0	0	Eukaryota	Rhizaria	Foraminifera	Monothalamids	Monothalamids_Clade-C	Monothalamids_Clade-C_X	Shinkaiya	Shinkaiya_lindsayi	Flagellated cells
1415	0	0	0	0	2284	143	0	0	0	0	0	0	0	0	0	Eukaryota	Alveolata	Dinoflagellata	Dinophyceae	Gymnodiniales	Warnowiaceae	Warnowia	Warnowia_sp.	Dinoflagellata (Alveolata)
1416	0	0	0	0	0	9	0	0	0	0	0	0	0	0	0	Eukaryota	Stramenopiles	Opalozoa	MAST-3	MAST-3J	MAST-3J_X	MAST-3J_XX	MAST-3J_XX_sp.	Bacillariophyta (Stramenopiles)
1417	0	0	0	0	0	0	7	33	0	6	368	0	39	193	2413	Eukaryota	Alveolata	Dinoflagellata	Noctilucophyceae	Noctilucales	Noctilucaceae	Noctiluca	Noctiluca_scintillans	Dinoflagellata (Alveolata)
1419	0	0	0	0	0	0	0	18	0	0	0	10	0	9	0	Eukaryota	Stramenopiles	Ochrophyta	Bacillariophyta	Bacillariophyta_X	Raphid-pennate	Psammodictyon	Psammodictyon_sp.	Bacillariophyta (Stramenopiles)
1420	0	0	0	0	0	0	0	0	0	0	0	0	0	0	19	Eukaryota	Hacrobia	Haptophyta	Prymnesiophyceae	Prymnesiales	Chrysochromulinaceae	Chrysochromulina	Chrysochromulina_sp.	Flagellated cells
1421	0	0	0	0	0	0	7	6	0	0	0	0	0	18	4	Eukaryota	Rhizaria	Cercozoa	Filosa-Imbricatea	Euglyphida	Paulinellidae	Paulinella	Paulinella_sp.	Flagellated cells
1422	0	222	1510	93	94	18	0	0	0	0	0	0	0	0	0	Eukaryota	Alveolata	Dinoflagellata	Dinophyceae	Peridiniales	Heterocapsaceae	Heterocapsa	Heterocapsa_pygmaea	Dinoflagellata (Alveolata)
1423	8	0	0	0	0	0	0	0	0	0	0	0	0	0	0	Eukaryota	Archaeplastida	Streptophyta	Embryophyceae	Embryophyceae_X	Embryophyceae_XX	Fagus	Fagus_grandifolia	Flagellated cells
1424	0	0	0	0	0	0	5	0	0	0	0	0	0	0	0	Eukaryota	Rhizaria	Cercozoa	Filosa-Thecofilosea	Ventricleftida	CCW10-lineage	CCW10-lineage_X	CCW10-lineage_X_sp.	Flagellated cells
1425	26	0	7	12	0	5	0	0	0	0	0	0	0	0	0	Eukaryota	Rhizaria	Cercozoa	Filosa-Imbricatea	Marimonadida	Marimonadida_X	Marimonadida_XX	Marimonadida_XX_sp.	Flagellated cells
1426	0	0	19	98	0	98	0	0	0	0	0	0	0	0	0	Eukaryota	Alveolata	Dinoflagellata	Dinophyceae	Gymnodiniales	Gymnodiniaceae	Lepidodinium	Lepidodinium_chlorophorum	Dinoflagellata (Alveolata)
1427	0	0	0	0	0	0	0	5	0	26	0	0	0	0	0	Eukaryota	Rhizaria	Cercozoa	Endomyxa-Phytomyxea	Phagomyxida	Phagomyxida_X	Maullinia	Maullinia_ectocarpii	Flagellated cells
1429	0	0	0	0	0	0	0	0	0	0	0	0	0	0	57	Eukaryota	Rhizaria	Cercozoa	Filosa-Imbricatea	Marimonadida	Marimonadida_X	Marimonadida_XX	Marimonadida_XX_sp.	Flagellated cells
1430	0	0	0	0	0	0	0	0	8	0	0	0	0	0	0	Eukaryota	Alveolata	Ciliophora	Spirotrichea	Strombidiida	Strombidiidae_L	Strombidiidae_L_X	Strombidiidae_L_X_sp.	Ciliophora (Alveolata)
1431	0	0	0	0	0	6	0	0	0	0	0	0	0	0	0	Eukaryota	Alveolata	Ciliophora	Phyllopharyngea	Cyrtophoria_1	Pithitidae	Pithites	Pithites_vorax	Ciliophora (Alveolata)
1432	0	0	0	0	0	0	0	0	0	0	0	0	0	11	0	Eukaryota	Stramenopiles	Opalozoa	Bicoecea	Bicoecales	Bicoecaceae	Bicoecaceae_X	Bicoecaceae_X_sp.	Bacillariophyta (Stramenopiles)
1433	0	0	0	3	0	13	0	0	0	0	0	0	0	0	0	Eukaryota	Alveolata	Ciliophora	Spirotrichea	Strombidiida	Strombidiidae_B	Strombidiidae_B_X	Strombidiidae_B_X_sp.	Ciliophora (Alveolata)
1434	0	0	0	0	0	23	0	0	0	0	0	0	0	0	0	Eukaryota	Alveolata	Dinoflagellata	Syndiniales	Dino-Group-II	Dino-Group-II-Clade-1	Dino-Group-II-Clade-1_X	Dino-Group-II-Clade-1_X_sp.	Dinoflagellata (Alveolata)
1436	0	0	41	28	2	8	0	0	0	0	0	0	0	0	0	Eukaryota	Alveolata	Apicomplexa	Coccidiomorphea	Eimeriida	Sarcocystidae	Toxoplasma2	Besnoitia_oryctofelisi	Flagellated cells
1438	0	0	0	0	0	0	13	11	0	0	0	0	0	0	0	Eukaryota	Rhizaria	Cercozoa	Filosa-Thecofilosea	Ventricleftida	Verrucomonadidae	Verrucomonas	Verrucomonas_sp.	Flagellated cells
1439	0	0	0	0	0	0	0	9	0	0	0	0	0	0	0	Eukaryota	Rhizaria	Cercozoa	Filosa-Imbricatea	Marimonadida	Marimonadida_X	Marimonadida_XX	Marimonadida_XX_sp.	Flagellated cells
1440	0	0	0	0	0	0	0	63	0	0	36	0	0	0	0	Eukaryota	Hacrobia	Cryptophyta	Cryptophyceae	Cryptomonadales	Cryptomonadales_X	Falcomonas	Falcomonas_daucoides	Flagellated cells
1441	0	0	0	0	0	0	8	4	0	8	0	0	0	0	0	Eukaryota	Hacrobia	Telonemia	Telonemia_X	Telonemia_XX	Telonemia-Group-2	Telonemia-Group-2_X	Telonemia-Group-2_X_sp.	Flagellated cells
1442	0	0	0	0	0	0	30	5	32	0	10	0	0	0	0	Eukaryota	Stramenopiles	Ochrophyta	Bacillariophyta	Bacillariophyta_X	Raphid-pennate	Raphid-pennate_X	Raphid-pennate_X_sp.	Bacillariophyta (Stramenopiles)
1443	0	0	0	0	0	16	0	0	0	0	0	0	0	0	0	Eukaryota	Hacrobia	Haptophyta	Prymnesiophyceae	Prymnesiales	Chrysochromulinaceae	Chrysochromulina	Chrysochromulina_sp.	Flagellated cells
1444	0	0	0	0	0	0	0	0	137	49	66	0	0	0	0	Eukaryota	Alveolata	Dinoflagellata	Syndiniales	Dino-Group-II	Dino-Group-II-Clade-30	Dino-Group-II-Clade-30_X	Dino-Group-II-Clade-30_X_sp.	Dinoflagellata (Alveolata)
1445	0	0	11	39	46	0	0	0	0	0	0	0	0	0	0	Eukaryota	Alveolata	Dinoflagellata	Dinophyceae	Suessiales	Suessiaceae	Biecheleria	Biecheleria_cincta	Dinoflagellata (Alveolata)
1446	0	0	0	15	0	0	0	0	0	0	0	0	0	0	0	Eukaryota	Alveolata	Ciliophora	Spirotrichea	Choreotrichida	Strombidinopsidae	Parastrombidinopsis	Parastrombidinopsis_sp.	Ciliophora (Alveolata)
1447	121	1269	0	0	121	80	0	0	0	0	0	0	0	0	0	Eukaryota	Alveolata	Dinoflagellata	Noctilucophyceae	Noctilucales	Noctilucaceae	Noctiluca	Noctiluca_scintillans	Dinoflagellata (Alveolata)
1448	0	0	0	0	0	178	0	0	0	0	0	0	0	0	0	Eukaryota	Stramenopiles	Ochrophyta	Bacillariophyta	Bacillariophyta_X	Radial-centric-basal-Coscinodiscophyceae	Rhizosolenia	Rhizosolenia_setigera	Bacillariophyta (Stramenopiles)
1449	0	0	0	0	0	0	13	0	0	0	0	0	0	0	0	Eukaryota	Hacrobia	Telonemia	Telonemia_X	Telonemia_XX	Telonemia-Group-2	Telonemia-Group-2_X	Telonemia-Group-2_X_sp.	Flagellated cells
1450	0	0	0	0	0	0	0	0	0	0	3	0	0	0	0	Eukaryota	Stramenopiles	Ochrophyta	Bacillariophyta	Bacillariophyta_X	Polar-centric-Mediophyceae	Cyclotella	Cyclotella_sp.	Bacillariophyta (Stramenopiles)
1451	0	0	0	0	0	0	0	23	12	0	0	0	0	0	0	Eukaryota	Opisthokonta	Choanoflagellida	Choanoflagellatea	Choanoflagellatea_X	Choanoflagellatea_X_Group_L	Choanoflagellatea_X_Group_L_X	Choanoflagellatea_X_Group_L_X_sp.	Flagellated cells
1452	0	0	0	11	0	0	0	0	0	0	0	0	0	0	0	Eukaryota	Alveolata	Dinoflagellata	Syndiniales	Dino-Group-I	Dino-Group-I-Clade-4	Euduboscquella	Euduboscquella_crenulata	Dinoflagellata (Alveolata)
1453	0	0	0	0	0	0	0	7	47	0	0	0	0	0	0	Eukaryota	Stramenopiles	Ochrophyta	Bacillariophyta	Bacillariophyta_X	Raphid-pennate	Navicula	Navicula_cryptocephala_var._veneta	Bacillariophyta (Stramenopiles)
1454	0	0	0	10	30	11	0	0	0	0	0	0	0	0	0	Eukaryota	Alveolata	Dinoflagellata	Syndiniales	Dino-Group-II	Dino-Group-II-Clade-8	Dino-Group-II-Clade-8_X	Dino-Group-II-Clade-8_X_sp.	Dinoflagellata (Alveolata)
1456	0	0	0	0	0	0	7	0	0	17	0	8	6	90	33	Eukaryota	Stramenopiles	Opalozoa	MAST-3	MAST-3D	MAST-3D_X	MAST-3D_XX	MAST-3D_XX_sp.	Bacillariophyta (Stramenopiles)
1457	0	0	0	60	14	89	0	0	0	0	0	0	0	0	0	Eukaryota	Stramenopiles	Ochrophyta	Bacillariophyta	Bacillariophyta_X	Polar-centric-Mediophyceae	Odontella	Odontella_aurita	Bacillariophyta (Stramenopiles)
1458	0	0	0	0	0	0	0	0	0	0	0	0	22	6	0	Eukaryota	Alveolata	Ciliophora	Phyllopharyngea	Suctoria	Acinetidae_1	Paracineta	Paracineta_limbata	Ciliophora (Alveolata)
1459	0	0	0	0	0	0	25	28	0	0	0	0	0	0	0	Eukaryota	Stramenopiles	Ochrophyta	Bacillariophyta	Bacillariophyta_X	Raphid-pennate	Navicula	Navicula_lanceolata	Bacillariophyta (Stramenopiles)
1460	4	0	23	9	0	0	0	0	0	0	0	0	0	0	0	Eukaryota	Rhizaria	Cercozoa	Filosa-Thecofilosea	Cryomonadida	Protaspa-lineage	Protaspa-lineage_X	Protaspa-lineage_X_sp.	Flagellated cells
1462	0	0	0	0	0	0	0	0	0	0	0	0	0	0	21	Eukaryota	Alveolata	Dinoflagellata	Dinophyceae	Dinophyceae_X	Dinophyceae_XX	Dinophyceae_XXX	Dinophyceae_XXX_sp.	Dinoflagellata (Alveolata)
1463	0	0	4	0	0	0	0	0	0	0	0	0	0	0	0	Eukaryota	Stramenopiles	Opalozoa	Bicoecea	Bicoecales	Bicoecaceae	Bicoecaceae_X	Bicoecaceae_X_sp.	Bacillariophyta (Stramenopiles)
1464	0	0	0	0	8	0	0	0	0	0	0	0	0	0	0	Eukaryota	Stramenopiles	Opalozoa	Bicoecea	Bicoecales	Bicoecaceae	Bicosoeca	Bicosoeca_sp.	Bacillariophyta (Stramenopiles)
1466	0	0	0	0	0	0	0	0	6	0	0	0	0	0	0	Eukaryota	Rhizaria	Cercozoa	Filosa-Thecofilosea	Ventricleftida	CCW10-lineage	CCW10-lineage_X	CCW10-lineage_X_sp.	Flagellated cells
1468	0	0	0	0	0	0	178	25	48	6	0	0	0	0	3	Eukaryota	Stramenopiles	Ochrophyta	Bacillariophyta	Bacillariophyta_X	Polar-centric-Mediophyceae	Polar-centric-Mediophyceae_X	Polar-centric-Mediophyceae_X_sp.	Bacillariophyta (Stramenopiles)
1469	1	0	214	52	491	7	0	0	0	0	0	0	0	0	0	Eukaryota	Rhizaria	Cercozoa	Endomyxa-Phytomyxea	Phagomyxida	Phagomyxidae	Phagomyxa	Phagomyxa_odontellae	Flagellated cells
1472	0	0	0	0	0	0	0	0	0	0	0	0	4	0	0	Eukaryota	Rhizaria	Cercozoa	Filosa-Imbricatea	Thaumatomonadida	Thaumatomonadidae	Thaumatomastix	Thaumatomastix_sp.	Flagellated cells
1473	0	0	0	0	0	0	858	0	36	170	0	0	0	0	0	Eukaryota	Stramenopiles	Ochrophyta	Bacillariophyta	Bacillariophyta_X	Polar-centric-Mediophyceae	Thalassiosira	Thalassiosira_sp.	Bacillariophyta (Stramenopiles)
1474	0	0	0	0	0	0	0	6	12	0	0	0	0	0	0	Eukaryota	Stramenopiles	Ochrophyta	Chrysophyceae	Chrysophyceae_X	Chrysophyceae_Clade-C	Chrysophyceae_Clade-C_X	Chrysophyceae_Clade-C_X_sp.	Bacillariophyta (Stramenopiles)
1476	0	0	0	0	0	0	9	0	0	0	0	0	0	0	0	Eukaryota	Alveolata	Dinoflagellata	Syndiniales	Dino-Group-II	Dino-Group-II_X	Dino-Group-II-Clade-52_X	Dino-Group-II-Clade-52_X_sp.	Dinoflagellata (Alveolata)
1477	0	0	0	0	0	0	0	0	11	0	0	0	0	0	0	Eukaryota	Archaeplastida	Chlorophyta	Palmophyllophyceae	Prasinococcales	Prasinococcales-Clade-B	Prasinoderma	Prasinoderma_coloniale	Flagellated cells
1478	9	0	0	0	0	0	0	0	0	0	0	0	0	0	0	Eukaryota	Alveolata	Ciliophora	Phyllopharyngea	Suctoria	Acinetidae_1	Paracineta	Paracineta_limbata	Ciliophora (Alveolata)
1479	0	0	0	0	0	0	0	0	0	0	0	0	0	13	0	Eukaryota	Hacrobia	Centroheliozoa	Centroheliozoa_X	Centroheliozoa_XX	Centroheliozoa_XXX	Centroheliozoa_XXXX	Centroheliozoa_XXXX_sp.	Flagellated cells
1480	0	0	0	0	0	0	0	0	0	6	0	25	0	0	0	Eukaryota	Alveolata	Apicomplexa	Coccidiomorphea	Eimeriida	Sarcocystidae	Toxoplasma2	Besnoitia_oryctofelisi	Flagellated cells
1481	0	0	0	0	0	0	0	0	8	0	0	0	0	0	0	Eukaryota	Apusozoa	Apusomonadidae	Apusomonadidae_Group-1	Apusomonadidae_Group-1_X	Apusomonadidae_Group-1_XX	Amastigomonas	Amastigomonas_sp.	Flagellated cells
1482	0	0	4	0	0	0	0	0	0	0	0	0	0	0	0	Eukaryota	Rhizaria	Cercozoa	Filosa-Imbricatea	Filosa-Imbricatea_X	Filosa-Imbricatea_XX	Filosa-Imbricatea_XXX	Filosa-Imbricatea_XXX_sp.	Flagellated cells
1483	0	0	0	0	0	15	0	0	0	0	0	0	0	0	0	Eukaryota	Stramenopiles	Opalozoa	MAST-3	MAST-3J	MAST-3J_X	MAST-3J_XX	MAST-3J_XX_sp.	Bacillariophyta (Stramenopiles)
1484	0	0	0	0	0	0	0	0	0	78	0	5	0	0	0	Eukaryota	Rhizaria	Cercozoa	Filosa-Thecofilosea	Ventricleftida	CCW10-lineage	CCW10-lineage_X	CCW10-lineage_X_sp.	Flagellated cells
1485	0	0	0	0	0	4	0	0	0	0	0	0	0	0	0	Eukaryota	Hacrobia	Telonemia	Telonemia_X	Telonemia_XX	Telonemia-Group-2	Telonemia-Group-2_X	Telonemia-Group-2_X_sp.	Flagellated cells
1486	0	0	0	0	0	0	143	20	45	0	0	0	0	0	0	Eukaryota	Stramenopiles	Ochrophyta	Bacillariophyta	Bacillariophyta_X	Polar-centric-Mediophyceae	Skeletonema	Skeletonema_sp.	Bacillariophyta (Stramenopiles)
1487	0	0	0	0	0	0	0	0	0	0	0	5	20	0	0	Eukaryota	Stramenopiles	Opalozoa	Bicoecea	Bicoecales	Bicoecaceae	Bicosoeca	Bicosoeca_vacillans	Bacillariophyta (Stramenopiles)
1488	0	0	0	0	0	0	0	0	8	0	0	0	0	0	0	Eukaryota	Alveolata	Apicomplexa	Gregarinomorphea	Gregarines	Gregarines_X	Selenidium1	Selenidium1_sp.	Flagellated cells
1489	0	0	0	0	0	0	0	64	30	15	51	5	0	19	0	Eukaryota	Rhizaria	Cercozoa	Filosa-Thecofilosea	Cryomonadida	Cryomonadida_X	Cryomonadida_XX	Cryomonadida_XX_sp.	Flagellated cells
1491	0	0	0	0	0	0	11	0	0	0	0	0	0	0	0	Eukaryota	Hacrobia	Telonemia	Telonemia_X	Telonemia_XX	Telonemia-Group-2	Telonemia-Group-2_X	Telonemia-Group-2_X_sp.	Flagellated cells
1492	0	0	0	0	0	0	0	0	0	0	0	0	0	16	0	Eukaryota	Hacrobia	Haptophyta	Prymnesiophyceae	Prymnesiales	Prymnesiaceae	Haptolina	Haptolina_sp.	Flagellated cells
1493	0	0	0	6	0	0	0	0	0	0	0	0	0	0	0	Eukaryota	Alveolata	Dinoflagellata	Syndiniales	Dino-Group-II	Dino-Group-II-Clade-1	Dino-Group-II-Clade-1_X	Dino-Group-II-Clade-1_X_sp.	Dinoflagellata (Alveolata)
1494	0	0	0	0	0	0	0	0	0	42	0	14	0	0	0	Eukaryota	Alveolata	Dinoflagellata	Dinophyceae	Dinophyceae_X	Dinophyceae_XX	Dinophyceae_XXX	Dinophyceae_XXX_sp.	Dinoflagellata (Alveolata)
1495	0	0	0	0	0	0	0	0	0	0	2	9	5	0	0	Eukaryota	Stramenopiles	Opalozoa	Bicoecea	Bicoecales	Bicoecaceae	Bicosoeca	Bicosoeca_vacillans	Bacillariophyta (Stramenopiles)
1496	0	0	0	0	0	0	0	17	32	3	24	0	0	0	0	Eukaryota	Stramenopiles	Ochrophyta	Bacillariophyta	Bacillariophyta_X	Araphid-pennate	Synedra	Synedra_berolinensis	Bacillariophyta (Stramenopiles)
1497	0	16	21	27	0	0	0	0	0	0	0	0	0	0	0	Eukaryota	Stramenopiles	Ochrophyta	Bacillariophyta	Bacillariophyta_X	Polar-centric-Mediophyceae	Cyclotella	Cyclotella_striata	Bacillariophyta (Stramenopiles)
1498	0	0	0	0	0	0	0	0	0	0	0	0	0	0	12	Eukaryota	Alveolata	Apicomplexa	Gregarinomorphea	Gregarines_GRE2	Gregarines_GRE2_X	Gregarines_GRE2_XX	Gregarines_GRE2_XX_sp.	Flagellated cells
1499	0	0	0	5	0	0	0	0	0	0	0	0	0	0	0	Eukaryota	Alveolata	Dinoflagellata	Dinophyceae	Peridiniales	Protoperidiniaceae	Protoperidinium	Protoperidinium_depressum	Dinoflagellata (Alveolata)
1501	0	0	0	0	0	0	0	0	7	343	87	701	83	8	0	Eukaryota	Rhizaria	Cercozoa	Filosa-Imbricatea	Filosa-Imbricatea_X	Novel-clade-2	Novel-clade-2_X	Novel-clade-2_X_sp.	Flagellated cells
1502	37	0	0	0	0	0	0	0	0	0	0	0	0	0	0	Eukaryota	Alveolata	Dinoflagellata	Dinophyceae	Dinophyceae_X	Dinophyceae_XX	Dinophyceae_XXX	Dinophyceae_XXX_sp.	Dinoflagellata (Alveolata)
1503	0	0	0	0	0	20	0	0	0	0	0	0	0	0	0	Eukaryota	Rhizaria	Cercozoa	Filosa-Thecofilosea	Ebriida	TAGIRI1-lineage	TAGIRI1-lineage_X	TAGIRI1-lineage_X_sp.	Flagellated cells
1504	0	0	66	0	0	0	0	0	0	0	0	0	0	0	0	Eukaryota	Alveolata	Dinoflagellata	Syndiniales	Dino-Group-I	Dino-Group-I-Clade-4	Dino-Group-I-Clade-4_X	Dino-Group-I-Clade-4_X_sp.	Dinoflagellata (Alveolata)
1505	0	0	0	0	0	0	0	0	0	19	0	10	0	0	0	Eukaryota	Rhizaria	Cercozoa	Filosa-Thecofilosea	Filosa-Thecofilosea_X	Novel-Clade-4	Novel-Clade-4_X	Novel-Clade-4_X_sp.	Flagellated cells
1506	0	36	4	81	0	0	0	0	0	0	0	0	0	0	0	Eukaryota	Stramenopiles	Ochrophyta	Bacillariophyta	Bacillariophyta_X	Polar-centric-Mediophyceae	Chaetoceros	Chaetoceros_danicus	Bacillariophyta (Stramenopiles)
1507	0	4	3	44	7	0	0	0	0	0	0	0	0	0	0	Eukaryota	Stramenopiles	Ochrophyta	Bacillariophyta	Bacillariophyta_X	Radial-centric-basal-Coscinodiscophyceae	Coscinodiscus	Coscinodiscus_radiatus	Bacillariophyta (Stramenopiles)
1508	0	87	3	67	0	0	0	0	0	0	0	0	0	0	0	Eukaryota	Stramenopiles	Ochrophyta	Bacillariophyta	Bacillariophyta_X	Raphid-pennate	Meuniera	Meuniera_membranacea	Bacillariophyta (Stramenopiles)
1509	0	0	8	12	0	0	0	0	0	0	0	0	0	0	0	Eukaryota	Alveolata	Dinoflagellata	Syndiniales	Dino-Group-II	Dino-Group-II-Clade-3	Dino-Group-II-Clade-3_X	Dino-Group-II-Clade-3_X_sp.	Dinoflagellata (Alveolata)
1510	0	0	0	0	0	6	0	0	0	0	0	0	0	0	0	Eukaryota	Alveolata	Ciliophora	Spirotrichea	Choreotrichida	Leegaardiellidae_B	Leegaardiella	Leegaardiella_sp.	Ciliophora (Alveolata)
1511	0	0	0	0	0	0	15	0	55	0	18	0	0	0	0	Eukaryota	Rhizaria	Cercozoa	Cercozoa_X	Cercozoa_XX	Cercozoa_XXX	Cercozoa_XXXX	Cercozoa_XXXX_sp.	Flagellated cells
1512	0	0	0	0	0	0	18	0	0	0	0	0	0	0	0	Eukaryota	Alveolata	Dinoflagellata	Dinophyceae	Peridiniales	Diplopsalidaceae	Qia	Qia_lebouriae	Dinoflagellata (Alveolata)
1513	0	0	0	0	0	0	50	160	0	0	0	0	0	0	0	Eukaryota	Opisthokonta	Choanoflagellida	Choanoflagellatea	Acanthoecida	Acanthoecida_X	Acanthoecida_XX	Acanthoecida_XX_sp.	Flagellated cells
1514	0	0	0	0	0	0	0	0	0	0	0	3	8	23	0	Eukaryota	Rhizaria	Cercozoa	Filosa-Imbricatea	Marimonadida	Marimonadida_X	Pseudopirsonia	Pseudopirsonia_mucosa	Flagellated cells
1515	0	34	7	24	9	145	0	0	0	0	0	0	0	0	0	Eukaryota	Hacrobia	Cryptophyta	Cryptophyceae	Cryptomonadales	Cryptomonadales_X	Teleaulax	Teleaulax_acuta	Flagellated cells
1516	3	0	0	0	0	0	0	0	0	0	0	0	0	0	0	Eukaryota	Rhizaria	Cercozoa	Filosa-Thecofilosea	Cryomonadida	Protaspa-lineage	Protaspa-lineage_X	Protaspa-lineage_X_sp.	Flagellated cells
1517	20	9	67	137	36	19	0	0	0	0	0	0	0	0	0	Eukaryota	Archaeplastida	Chlorophyta	Prasino-Clade-V	Pseudoscourfieldiales	Pycnococcaceae	Pycnococcaceae_X	Pycnococcaceae_X_sp.	Flagellated cells
1518	0	0	0	0	0	97	0	0	0	0	0	0	0	0	0	Eukaryota	Opisthokonta	Choanoflagellida	Choanoflagellatea	Acanthoecida	Acanthoecida_X	Acanthoecida_XX	Acanthoecida_XX_sp.	Flagellated cells
1519	0	0	0	0	0	0	0	112	8	0	0	0	0	0	0	Eukaryota	Alveolata	Dinoflagellata	Syndiniales	Dino-Group-II	Dino-Group-II-Clade-1	Dino-Group-II-Clade-1_X	Dino-Group-II-Clade-1_X_sp.	Dinoflagellata (Alveolata)
1520	0	0	0	14	0	0	0	0	0	0	0	0	0	0	0	Eukaryota	Alveolata	Dinoflagellata	Syndiniales	Dino-Group-I	Dino-Group-I-Clade-4	Euduboscquella	Euduboscquella_crenulata	Dinoflagellata (Alveolata)
1521	0	0	0	0	0	0	0	32	0	0	15	0	0	0	0	Eukaryota	Rhizaria	Cercozoa	Filosa-Imbricatea	Filosa-Imbricatea_X	Novel-clade-2	Novel-clade-2_X	Novel-clade-2_X_sp.	Flagellated cells
1522	0	0	0	0	5	0	0	0	0	0	0	0	0	0	0	Eukaryota	Rhizaria	Cercozoa	Filosa	Filosa_X	Filosa_XX	Discomonas	Discomonas_retusa	Flagellated cells
1523	0	0	0	0	0	0	11	4	47	17	210	0	0	0	0	Eukaryota	Rhizaria	Cercozoa	Filosa-Imbricatea	Filosa-Imbricatea_X	Novel-clade-2	Novel-clade-2_X	Novel-clade-2_X_sp.	Flagellated cells
1524	0	0	0	0	0	0	12	0	0	48	0	0	0	0	0	Eukaryota	Opisthokonta	Mesomycetozoa	Ichthyosporea	Ichthyosphonida	Abeoformidae_Group_MAIP_1	Abeoformidae_Group_MAIP_1_X	Abeoformidae_Group_MAIP_1_X_sp.	Flagellated cells
1525	0	0	770	409	54	0	0	0	0	0	0	0	0	0	0	Eukaryota	Alveolata	Dinoflagellata	Syndiniales	Dino-Group-I	Dino-Group-I-Clade-4	Dino-Group-I-Clade-4_X	Dino-Group-I-Clade-4_X_sp.	Dinoflagellata (Alveolata)
1526	0	0	0	0	0	0	0	11	10	0	12	0	14	18	0	Eukaryota	Rhizaria	Cercozoa	Filosa-Thecofilosea	Ventricleftida	Ventrifissuridae	Ventrifissuridae_X	Ventrifissuridae_X_sp.	Flagellated cells
1528	0	0	0	0	0	0	0	8	0	0	0	0	0	0	0	Eukaryota	Rhizaria	Cercozoa	Filosa-Thecofilosea	Filosa-Thecofilosea_X	Mataza-lineage	Mataza-lineage_X	Mataza-lineage_X_sp.	Flagellated cells
1529	0	0	7	0	0	0	0	0	0	0	0	0	0	0	0	Eukaryota	Rhizaria	Cercozoa	Filosa-Thecofilosea	Filosa-Thecofilosea_X	Mataza-lineage	Mataza-lineage_X	Mataza-lineage_X_sp.	Flagellated cells
1530	0	0	0	235	0	251	0	0	0	0	0	0	0	0	0	Eukaryota	Alveolata	Dinoflagellata	Dinophyceae	Gymnodiniales	Gymnodiniaceae	Gyrodinium	Gyrodinium_helveticum	Dinoflagellata (Alveolata)
1531	0	0	0	0	0	14	0	0	0	0	0	0	0	0	0	Eukaryota	Rhizaria	Cercozoa	Filosa-Thecofilosea	Ebriida	TAGIRI1-lineage	TAGIRI1-lineage_X	TAGIRI1-lineage_X_sp.	Flagellated cells
1532	0	0	0	0	0	0	155	0	0	0	0	0	0	0	0	Eukaryota	Alveolata	Ciliophora	Spirotrichea	Strombidiida	Strombidiidae_G	Strombidiidae_G_X	Strombidiidae_G_X_sp.	Ciliophora (Alveolata)
1533	0	0	0	0	0	0	0	0	9	0	0	0	0	0	0	Eukaryota	Alveolata	Apicomplexa	Coccidiomorphea	Eimeriida	Sarcocystidae	Toxoplasma2	Besnoitia_oryctofelisi	Flagellated cells
1534	0	0	0	0	0	0	0	12	3	0	20	0	0	0	0	Eukaryota	Stramenopiles	Ochrophyta	Bacillariophyta	Bacillariophyta_X	Polar-centric-Mediophyceae	Thalassiosira	Thalassiosira_minima	Bacillariophyta (Stramenopiles)
1535	0	0	0	0	0	0	0	0	0	0	0	0	13	0	0	Eukaryota	Hacrobia	Haptophyta	Prymnesiophyceae	Prymnesiales	Chrysochromulinaceae	Chrysochromulina	Chrysochromulina_sp.	Flagellated cells
1536	0	0	0	0	0	0	158	18	50	0	23	15	0	3	0	Eukaryota	Archaeplastida	Chlorophyta	Prasino-Clade-V	Pseudoscourfieldiales	Pycnococcaceae	Pycnococcaceae_X	Pycnococcaceae_X_sp.	Flagellated cells
1537	0	0	0	0	0	39	0	0	0	0	0	0	0	0	0	Eukaryota	Alveolata	Dinoflagellata	Syndiniales	Dino-Group-II	Dino-Group-II-Clade-1	Dino-Group-II-Clade-1_X	Dino-Group-II-Clade-1_X_sp.	Dinoflagellata (Alveolata)
1539	0	0	0	0	0	0	0	0	0	0	0	0	0	0	29	Eukaryota	Alveolata	Dinoflagellata	Dinophyceae	Gymnodiniales	Gymnodiniaceae	Gyrodinium	Gyrodinium_spirale	Dinoflagellata (Alveolata)
1540	0	0	0	0	0	0	0	0	136	0	0	0	0	0	0	Eukaryota	Stramenopiles	Ochrophyta	Bacillariophyta	Bacillariophyta_X	Polar-centric-Mediophyceae	Thalassiosira	Thalassiosira_anguste-lineata	Bacillariophyta (Stramenopiles)
1541	0	0	0	55	0	10	0	0	0	0	0	0	0	0	0	Eukaryota	Alveolata	Dinoflagellata	Dinophyceae	Gymnodiniales	Gymnodiniaceae	Spiniferodinium	Spiniferodinium_palauense	Dinoflagellata (Alveolata)
1542	0	0	0	0	0	0	42	20	27	0	0	0	0	0	0	Eukaryota	Hacrobia	Haptophyta	Prymnesiophyceae	Isochrysidales	Noelaerhabdaceae	Gephyrocapsa	Gephyrocapsa_oceanica	Flagellated cells
1543	0	0	0	3	2	15	0	0	0	0	0	0	0	0	0	Eukaryota	Stramenopiles	Ochrophyta	Bacillariophyta	Bacillariophyta_X	Polar-centric-Mediophyceae	Thalassiosira	Thalassiosira_curviseriata	Bacillariophyta (Stramenopiles)
1545	0	0	0	0	0	0	0	0	0	0	0	0	3	0	0	Eukaryota	Stramenopiles	Opalozoa	Bicoecea	Bicoecales	Bicoecaceae	Bicosoeca	Bicosoeca_vacillans	Bacillariophyta (Stramenopiles)
1546	0	0	0	0	0	0	28	0	0	69	0	0	0	0	0	Eukaryota	Rhizaria	Cercozoa	Filosa-Thecofilosea	Ventricleftida	Ventrifissuridae	Ventrifissuridae_X	Ventrifissuridae_X_sp.	Flagellated cells
1548	0	0	0	0	0	0	0	0	0	0	0	0	5	10	0	Eukaryota	Alveolata	Dinoflagellata	Dinophyceae	Gymnodiniales	Gymnodiniaceae	Gymnodinium	Gymnodinium_sp.	Dinoflagellata (Alveolata)
1549	0	0	5	0	0	0	0	0	0	0	0	0	0	0	0	Eukaryota	Alveolata	Dinoflagellata	Syndiniales	Dino-Group-I	Dino-Group-I-Clade-4	Euduboscquella	Euduboscquella_crenulata	Dinoflagellata (Alveolata)
1550	0	0	0	0	0	7	0	0	0	0	0	0	0	0	0	Eukaryota	Apusozoa	Apusomonadidae	Apusomonadidae_Group-1	Apusomonadidae_Group-1_X	Apusomonadidae_Group-1_XX	Apusomonadidae_Group-1_XXX	Apusomonadidae_Group-1_XXX_sp.	Flagellated cells
1551	0	0	0	0	0	0	62	38	23	0	12	0	0	0	6	Eukaryota	Archaeplastida	Rhodophyta	Compsopogonophyceae	Erythropeltidales	Erythropeltidales_X	Smithora	Smithora_naiadum	Flagellated cells
1552	0	0	0	0	0	0	5	0	0	0	0	0	0	0	0	Eukaryota	Alveolata	Dinoflagellata	Syndiniales	Dino-Group-II	Dino-Group-II-Clade-5	Dino-Group-II-Clade-5_X	Dino-Group-II-Clade-5_X_sp.	Dinoflagellata (Alveolata)
1553	0	0	0	0	0	0	0	0	15	0	0	0	0	0	0	Eukaryota	Rhizaria	Cercozoa	Filosa-Imbricatea	Marimonadida	Marimonadida_X	Marimonadida_XX	Marimonadida_XX_sp.	Flagellated cells
1554	0	0	0	0	0	0	0	0	73	0	0	0	0	0	0	Eukaryota	Stramenopiles	Ochrophyta	Bacillariophyta	Bacillariophyta_X	Polar-centric-Mediophyceae	Thalassiosira	Thalassiosira_profunda	Bacillariophyta (Stramenopiles)
1556	0	0	0	0	0	0	0	0	0	18	0	0	12	5	0	Eukaryota	Opisthokonta	Choanoflagellida	Choanoflagellatea	Acanthoecida	Acanthoecidae_Group_G	Helgoeca	Helgoeca_nana	Flagellated cells
1557	0	0	0	3	0	0	0	0	0	0	0	0	0	0	0	Eukaryota	Stramenopiles	Opalozoa	Bicoecea	Bicoecales	Bicoecaceae	Bicosoeca	Bicosoeca_vacillans	Bacillariophyta (Stramenopiles)
1558	0	0	0	23	0	0	0	0	0	0	0	0	0	0	0	Eukaryota	Stramenopiles	Ochrophyta	Bacillariophyta	Bacillariophyta_X	Radial-centric-basal-Coscinodiscophyceae	Actinocyclus	Actinocyclus_curvatulus	Bacillariophyta (Stramenopiles)
1559	0	24	0	0	0	8	0	0	0	0	0	0	0	0	0	Eukaryota	Opisthokonta	Choanoflagellida	Choanoflagellatea	Acanthoecida	Acanthoecidae_Group_G	Helgoeca	Helgoeca_nana	Flagellated cells
1560	0	0	0	0	0	0	29	112	0	151	0	0	0	0	0	Eukaryota	Opisthokonta	Choanoflagellida	Choanoflagellatea	Acanthoecida	Stephanoecidae_Group_D	Stephanoecidae_Group_D_X	Stephanoecidae_Group_D_X_sp.	Flagellated cells
1561	0	0	0	0	20	17	0	0	0	0	0	0	0	0	0	Eukaryota	Stramenopiles	Ochrophyta	Bacillariophyta	Bacillariophyta_X	Raphid-pennate	Bacillaria	Bacillaria_paxillifer	Bacillariophyta (Stramenopiles)
1562	0	0	0	0	0	0	0	0	0	0	0	0	5	0	0	Eukaryota	Rhizaria	Cercozoa	Filosa-Imbricatea	Filosa-Imbricatea_X	Novel-clade-2	Novel-clade-2_X	Novel-clade-2_X_sp.	Flagellated cells
1563	0	0	0	0	0	10	0	0	0	0	0	0	0	0	0	Eukaryota	Alveolata	Dinoflagellata	Syndiniales	Dino-Group-I	Dino-Group-I-Clade-4	Euduboscquella	Euduboscquella_crenulata	Dinoflagellata (Alveolata)
1564	0	59	0	31	0	0	0	0	0	0	0	0	0	0	0	Eukaryota	Alveolata	Dinoflagellata	Dinophyceae	Dinophysiales	Amphisoleniaceae	Amphisoleniaceae_X	Amphisoleniaceae_X_sp.	Dinoflagellata (Alveolata)
1565	0	0	0	0	0	37	0	0	0	0	0	0	0	0	0	Eukaryota	Archaeplastida	Rhodophyta	Compsopogonophyceae	Erythropeltidales	Erythropeltidales_X	Smithora	Smithora_naiadum	Flagellated cells
1566	0	0	0	0	0	0	0	0	37	0	0	0	0	0	0	Eukaryota	Alveolata	Dinoflagellata	Syndiniales	Dino-Group-II	Dino-Group-II-Clade-39	Dino-Group-II-Clade-39_X	Dino-Group-II-Clade-39_X_sp.	Dinoflagellata (Alveolata)
1567	0	0	0	0	0	12	0	0	0	0	0	0	0	0	0	Eukaryota	Alveolata	Ciliophora	Spirotrichea	Strombidiida	Strombidiidae_R	Strombidium_R	Strombidium_R_sp.	Ciliophora (Alveolata)
1569	0	0	0	0	0	29	0	0	0	0	0	0	0	0	0	Eukaryota	Alveolata	Dinoflagellata	Dinophyceae	Prorocentrales	Prorocentraceae	Prorocentrum	Prorocentrum_sp.	Dinoflagellata (Alveolata)
1570	0	17	0	0	0	0	0	0	0	0	0	0	0	0	0	Eukaryota	Alveolata	Dinoflagellata	Dinophyceae	Dinophyceae_X	Dinophyceae_XX	Dinophyceae_XXX	Dinophyceae_XXX_sp.	Dinoflagellata (Alveolata)
1571	0	0	0	79	340	88	0	0	0	0	0	0	0	0	0	Eukaryota	Hacrobia	Haptophyta	Prymnesiophyceae	Isochrysidales	Noelaerhabdaceae	Gephyrocapsa	Gephyrocapsa_oceanica	Flagellated cells
1572	0	0	8	25	83	67	0	0	0	0	0	0	0	0	0	Eukaryota	Alveolata	Dinoflagellata	Syndiniales	Dino-Group-II	Dino-Group-II-Clade-1	Dino-Group-II-Clade-1_X	Dino-Group-II-Clade-1_X_sp.	Dinoflagellata (Alveolata)
1573	0	0	0	0	0	0	0	14	0	0	0	0	0	0	0	Eukaryota	Alveolata	Ciliophora	Spirotrichea	Tintinnida	Tintinnidiidae	Tintinnidium	Tintinnidium_sp.	Ciliophora (Alveolata)
1574	0	0	0	11	0	0	0	0	0	0	0	0	0	0	0	Eukaryota	Hacrobia	Centroheliozoa	Centroheliozoa_X	Centroheliozoa_XX	Centroheliozoa_XXX	Centroheliozoa_XXXX	Centroheliozoa_XXXX_sp.	Flagellated cells
1575	0	0	0	0	0	24	0	0	0	0	0	0	0	0	0	Eukaryota	Alveolata	Ciliophora	Spirotrichea	Strombidiida	Strombidiidae	Spirostrombidium	Spirostrombidium_agathae	Ciliophora (Alveolata)
1576	0	0	0	0	0	0	0	0	82	0	0	0	0	0	0	Eukaryota	Stramenopiles	Opalozoa	Bicoecea	Borokales	Borokaceae	Borokaceae_X	Borokaceae_X_sp.	Bacillariophyta (Stramenopiles)
1577	0	0	0	0	0	12	0	0	0	0	0	0	0	0	0	Eukaryota	Rhizaria	Cercozoa	Filosa-Imbricatea	Thaumatomonadida	Thaumatomonadidae	Reckertia	Reckertia_filosa	Flagellated cells
1578	0	0	0	0	0	0	0	6	19	0	0	0	0	0	0	Eukaryota	Alveolata	Dinoflagellata	Dinophyceae	Gymnodiniales	Gymnodiniaceae	Gyrodinium	Gyrodinium_sp.	Dinoflagellata (Alveolata)
1579	0	0	0	0	0	0	0	0	5	0	0	0	0	0	0	Eukaryota	Alveolata	Dinoflagellata	Dinophyceae	Peridiniales	Thoracosphaeraceae	Thoracosphaeraceae_X	Thoracosphaeraceae_X_sp.	Dinoflagellata (Alveolata)
1581	0	8	0	15	0	23	0	0	0	0	0	0	0	0	0	Eukaryota	Rhizaria	Cercozoa	Filosa-Imbricatea	Filosa-Imbricatea_X	Novel-clade-2	Novel-clade-2_X	Novel-clade-2_X_sp.	Flagellated cells
1584	0	5	0	0	0	7	0	0	0	0	0	0	0	0	0	Eukaryota	Hacrobia	Haptophyta	Prymnesiophyceae	Prymnesiales	Prymnesiaceae	Haptolina	Haptolina_sp.	Flagellated cells
1585	0	0	0	0	0	0	0	0	0	0	0	0	0	24	0	Eukaryota	Stramenopiles	Opalozoa	Bicoecea	Borokales	Borokaceae	Borokaceae_X	Borokaceae_X_sp.	Bacillariophyta (Stramenopiles)
1586	0	12	0	0	0	0	0	0	0	0	0	0	0	0	0	Eukaryota	Alveolata	Apicomplexa	Colpodellidea	Colpodellida	Colpodellaceae	Voromonas	Voromonas_pontica	Flagellated cells
1587	0	0	0	0	0	0	0	0	0	0	0	0	0	19	0	Eukaryota	Alveolata	Dinoflagellata	Dinophyceae	Dinophyceae_X	Dinophyceae_XX	Dinophyceae_XXX	Dinophyceae_XXX_sp.	Dinoflagellata (Alveolata)
1588	0	0	0	0	0	83	0	0	0	0	0	0	0	0	0	Eukaryota	Stramenopiles	Ochrophyta	Bacillariophyta	Bacillariophyta_X	Polar-centric-Mediophyceae	Thalassiosira	Thalassiosira_sp.	Bacillariophyta (Stramenopiles)
1589	0	0	0	0	0	0	3	13	40	0	10	0	0	0	0	Eukaryota	Stramenopiles	Ochrophyta	Bacillariophyta	Bacillariophyta_X	Raphid-pennate	Cylindrotheca	Cylindrotheca_sp.	Bacillariophyta (Stramenopiles)
1591	0	0	0	0	0	0	27	1099	503	6	64	29	56	302	4	Eukaryota	Stramenopiles	Opalozoa	MAST-3	MAST-3C	MAST-3C_X	MAST-3C_XX	MAST-3C_XX_sp.	Bacillariophyta (Stramenopiles)
1592	0	0	0	0	0	0	4	0	0	0	0	0	0	0	0	Eukaryota	Rhizaria	Cercozoa	Filosa	Filosa_X	Filosa_XX	Discomonas	Discomonas_retusa	Flagellated cells
1593	0	0	0	0	0	0	12	0	0	0	0	0	0	0	0	Eukaryota	Hacrobia	Haptophyta	Prymnesiophyceae	Prymnesiales	Prymnesiaceae	Haptolina	Haptolina_sp.	Flagellated cells
1594	0	0	0	0	0	0	0	0	0	0	0	7	7	45	0	Eukaryota	Rhizaria	Cercozoa	Filosa-Thecofilosea	Ventricleftida	Ventrifissuridae	Ventrifissuridae_X	Ventrifissuridae_X_sp.	Flagellated cells
1595	0	0	0	0	0	0	95	49	27	20	8	0	12	174	10	Eukaryota	Hacrobia	Haptophyta	Prymnesiophyceae	Prymnesiales	Chrysochromulinaceae	Chrysochromulina	Chrysochromulina_sp.	Flagellated cells
1597	0	0	0	1	7	8	0	0	0	0	0	0	0	0	0	Eukaryota	Stramenopiles	Opalozoa	Bicoecea	Borokales	Borokaceae	Borokaceae_X	Borokaceae_X_sp.	Bacillariophyta (Stramenopiles)
1598	0	0	0	0	0	0	0	0	0	0	7	0	0	0	0	Eukaryota	Rhizaria	Cercozoa	Filosa-Thecofilosea	Ebriida	TAGIRI1-lineage	TAGIRI1-lineage_X	TAGIRI1-lineage_X_sp.	Flagellated cells
1599	0	0	0	0	0	0	0	0	5	0	17	1977	151	16	0	Eukaryota	Alveolata	Ciliophora	Phyllopharyngea	Suctoria	Acinetidae_2	Acineta_1	Acineta_1_sp.	Ciliophora (Alveolata)
1601	0	0	12	0	0	0	0	0	0	0	0	0	0	0	0	Eukaryota	Alveolata	Dinoflagellata	Dinophyceae	Dinophyceae_X	Dinophyceae_XX	Dinophyceae_XXX	Dinophyceae_XXX_sp.	Dinoflagellata (Alveolata)
1602	0	0	0	6	0	0	0	0	0	0	0	0	0	0	0	Eukaryota	Archaeplastida	Rhodophyta	Compsopogonophyceae	Erythropeltidales	Erythropeltidales_X	Smithora	Smithora_naiadum	Flagellated cells
1603	0	0	0	0	0	0	0	8	0	0	0	0	0	0	0	Eukaryota	Apusozoa	Apusomonadidae	Apusomonadidae_Group-1	Apusomonadidae_Group-1_X	Apusomonadidae_Group-1_XX	Apusomonadidae_Group-1_XXX	Apusomonadidae_Group-1_XXX_sp.	Flagellated cells
1604	0	0	0	0	0	30	0	0	0	0	0	0	0	0	0	Eukaryota	Hacrobia	Cryptophyta	Cryptophyceae	Cryptomonadales	Cryptomonadales_X	Falcomonas	Falcomonas_daucoides	Flagellated cells
1607	0	0	504	107	0	0	0	0	0	0	0	0	0	0	0	Eukaryota	Rhizaria	Cercozoa	Filosa-Thecofilosea	Ebriida	Ebriidae	Ebria	Ebria_tripartita	Flagellated cells
1608	0	0	0	0	0	0	5	0	0	0	0	0	0	0	0	Eukaryota	Alveolata	Ciliophora	Spirotrichea	Strombidiida	Strombidiidae_R	Strombidium_R	Strombidium_R_sp.	Ciliophora (Alveolata)
1610	0	0	0	0	0	0	0	0	5	0	0	0	0	0	0	Eukaryota	Alveolata	Ciliophora	Spirotrichea	Tintinnida	Eutintinnidae	Eutintinnus	Eutintinnus_tubulosus	Ciliophora (Alveolata)
1611	0	0	0	0	0	0	12	0	0	0	0	0	0	0	0	Eukaryota	Hacrobia	Haptophyta	Prymnesiophyceae	Prymnesiales	Prymnesiaceae	Prymnesium	Prymnesium_sp.	Flagellated cells
1613	0	0	0	0	0	0	0	0	0	0	0	0	0	17	0	Eukaryota	Stramenopiles	Opalozoa	Bicoecea	Borokales	Borokaceae	Borokaceae_X	Borokaceae_X_sp.	Bacillariophyta (Stramenopiles)
1614	0	0	0	0	0	0	0	205	25	0	6	0	0	0	0	Eukaryota	Opisthokonta	Choanoflagellida	Choanoflagellatea	Acanthoecida	Stephanoecidae_Group_D	Stephanoecidae_Group_D_X	Stephanoecidae_Group_D_X_sp.	Flagellated cells
1616	0	0	0	10	0	0	0	0	0	0	0	0	0	0	0	Eukaryota	Alveolata	Dinoflagellata	Syndiniales	Dino-Group-I	Dino-Group-I-Clade-4	Euduboscquella	Euduboscquella_sp.	Dinoflagellata (Alveolata)
1617	0	0	0	0	9	0	0	0	0	0	0	0	0	0	0	Eukaryota	Hacrobia	Haptophyta	Prymnesiophyceae	Prymnesiales	Prymnesiaceae	Prymnesium	Prymnesium_sp.	Flagellated cells
1618	0	0	10	87	0	185	0	0	0	0	0	0	0	0	0	Eukaryota	Stramenopiles	Ochrophyta	Bacillariophyta	Bacillariophyta_X	Polar-centric-Mediophyceae	Porosira	Porosira_pseudodelicatula	Bacillariophyta (Stramenopiles)
1619	0	0	0	0	0	0	0	0	0	0	0	15	0	0	0	Eukaryota	Archaeplastida	Streptophyta	Embryophyceae	Embryophyceae_X	Embryophyceae_XX	Lithocarpus	Lithocarpus_rufovillosus	Flagellated cells
1620	0	0	0	0	0	0	0	0	0	0	0	0	45	0	0	Eukaryota	Opisthokonta	Choanoflagellida	Choanoflagellatea	Acanthoecida	Stephanoecidae_Group_D	Stephanoecidae_Group_D_X	Stephanoecidae_Group_D_X_sp.	Flagellated cells
1621	0	0	0	0	0	0	0	0	0	25	0	0	0	0	0	Eukaryota	Rhizaria	Cercozoa	Filosa-Thecofilosea	Cryomonadida	Protaspa-lineage	Protaspa	Protaspa_obliqua	Flagellated cells
1622	0	0	0	0	0	0	0	21	0	0	2	0	0	8	0	Eukaryota	Opisthokonta	Choanoflagellida	Choanoflagellatea	Acanthoecida	Stephanoecidae_Group_D	Stephanoecidae_Group_D_X	Stephanoecidae_Group_D_X_sp.	Flagellated cells
1623	0	90	7	36	43	141	0	0	0	0	0	0	0	0	0	Eukaryota	Alveolata	Dinoflagellata	Dinophyceae	Gymnodiniales	Gymnodiniaceae	Gyrodinium	Gyrodinium_dominans	Dinoflagellata (Alveolata)
1624	0	0	0	0	0	25	0	0	0	0	0	0	0	0	0	Eukaryota	Opisthokonta	Choanoflagellida	Choanoflagellatea	Acanthoecida	Stephanoecidae_Group_D	Stephanoecidae_Group_D_X	Stephanoecidae_Group_D_X_sp.	Flagellated cells
1625	0	0	39	0	178	0	0	0	0	0	0	0	0	0	0	Eukaryota	Rhizaria	Cercozoa	Endomyxa-Phytomyxea	Phagomyxida	Phagomyxidae	Phagomyxa	Phagomyxa_odontellae	Flagellated cells
1626	0	0	0	0	0	0	0	0	0	0	0	9	0	0	0	Eukaryota	Alveolata	Perkinsea	Perkinsida	Perkinsida_X	Perkinsida_XX	Perkinsus	Perkinsus_qugwadi	Flagellated cells
1627	0	0	0	0	0	0	0	17	3	0	3	0	6	0	0	Eukaryota	Rhizaria	Cercozoa	Filosa-Thecofilosea	Ebriida	TAGIRI1-lineage	TAGIRI1-lineage_X	TAGIRI1-lineage_X_sp.	Flagellated cells
1628	0	0	0	0	0	0	8	0	0	0	0	0	0	0	0	Eukaryota	Alveolata	Dinoflagellata	Dinophyceae	Gymnodiniales	Gymnodiniaceae	Polykrikos	Polykrikos_kofoidii	Dinoflagellata (Alveolata)
1629	0	0	0	0	0	0	58	232	882	81	2173	0	0	0	31	Eukaryota	Alveolata	Ciliophora	Spirotrichea	Strombidiida	Strombidiidae_M	Strombidiidae_M_X	Strombidiidae_M_X_sp.	Ciliophora (Alveolata)
1630	0	0	0	0	0	0	23	0	0	0	0	0	0	0	0	Eukaryota	Rhizaria	Cercozoa	Filosa-Imbricatea	Filosa-Imbricatea_X	Novel-clade-2	Novel-clade-2_X	Novel-clade-2_X_sp.	Flagellated cells
1631	0	0	0	675	157	0	0	0	0	0	0	0	0	0	0	Eukaryota	Alveolata	Dinoflagellata	Dinophyceae	Gymnodiniales	Warnowiaceae	Warnowia	Warnowia_sp.	Dinoflagellata (Alveolata)
1633	0	6	0	0	0	0	0	0	0	0	0	0	0	0	0	Eukaryota	Alveolata	Dinoflagellata	Dinophyceae	Dinophysiales	Dinophysiaceae	Dinophysis	Dinophysis_acuminata	Dinoflagellata (Alveolata)
1634	0	0	0	0	0	0	39	9	26	86	21	245	246	301	10	Eukaryota	Stramenopiles	Ochrophyta	Bacillariophyta	Bacillariophyta_X	Raphid-pennate	Pseudo-nitzschia	Pseudo-nitzschia_delicatissima	Bacillariophyta (Stramenopiles)
1635	0	0	0	0	0	0	0	0	0	0	0	0	0	17	0	Eukaryota	Stramenopiles	Opalozoa	Bicoecea	Borokales	Borokaceae	Borokaceae_X	Borokaceae_X_sp.	Bacillariophyta (Stramenopiles)
1637	0	0	0	0	0	0	0	0	5	0	0	0	0	0	0	Eukaryota	Archaeplastida	Chlorophyta	Chlorophyceae	Chlamydomonadales	Chlamydomonadales_X	Chlamydomonas	Chlamydomonas_monadina	Flagellated cells
1638	0	12	17	0	0	0	0	0	0	0	0	0	0	0	0	Eukaryota	Alveolata	Dinoflagellata	Dinophyceae	Gonyaulacales	Gonyaulacaceae	Gonyaulax	Gonyaulax_spinifera	Dinoflagellata (Alveolata)
1639	7	0	0	0	0	0	0	0	0	0	0	0	0	0	0	Eukaryota	Hacrobia	Haptophyta	Prymnesiophyceae	Prymnesiales	Prymnesiaceae	Prymnesium	Prymnesium_sp.	Flagellated cells
1640	0	0	0	0	0	0	0	13	0	0	0	0	0	0	0	Eukaryota	Rhizaria	Cercozoa	Filosa-Thecofilosea	Ventricleftida	Ventricleftida_X	Ventricleftida_XX	Ventricleftida_XX_sp.	Flagellated cells
1641	5	0	0	0	0	0	0	0	0	0	0	0	0	0	0	Eukaryota	Rhizaria	Cercozoa	Filosa-Imbricatea	Thaumatomonadida	Thaumatomonadidae	Thaumatomastix	Thaumatomastix_sp.	Flagellated cells
1644	0	0	0	0	0	0	0	0	0	0	0	0	0	29	0	Eukaryota	Stramenopiles	Ochrophyta	Bacillariophyta	Bacillariophyta_X	Polar-centric-Mediophyceae	Cyclotella	Cyclotella_striata	Bacillariophyta (Stramenopiles)
1645	0	0	0	0	0	0	0	0	0	0	6	0	0	0	0	Eukaryota	Amoebozoa	Lobosa	Tubulinea	Arcellinida	Arcellinida_X	Cryptodifflugia	Cryptodifflugia_operculata	Flagellated cells
1646	0	0	65	0	0	0	0	0	0	0	0	0	0	0	0	Eukaryota	Rhizaria	Cercozoa	Filosa-Thecofilosea	Cryomonadida	Cryothecomonas-lineage	Cryothecomonas	Cryothecomonas_sp.	Flagellated cells
1647	11	0	0	0	0	0	0	0	0	0	0	0	0	0	0	Eukaryota	Alveolata	Ciliophora	Spirotrichea	Strombidiida	Strombidiidae_M	Strombidiidae_M_X	Strombidiidae_M_X_sp.	Ciliophora (Alveolata)
1648	0	0	0	0	0	0	0	0	0	0	0	0	12	0	0	Eukaryota	Rhizaria	Foraminifera	Monothalamids	Monothalamids_Clade-C	Monothalamids_Clade-C_X	Shinkaiya	Shinkaiya_lindsayi	Flagellated cells
1649	0	0	0	0	0	0	0	0	0	0	0	19	0	0	0	Eukaryota	Opisthokonta	Choanoflagellida	Choanoflagellatea	Acanthoecida	Stephanoecidae_Group_D	Stephanoecidae_Group_D_X	Stephanoecidae_Group_D_X_sp.	Flagellated cells
1650	0	0	0	0	0	14	0	0	0	0	0	0	0	0	0	Eukaryota	Opisthokonta	Choanoflagellida	Choanoflagellatea	Choanoflagellatea_X	Choanoflagellatea_X_Group_L	Choanoflagellatea_X_Group_L_X	Choanoflagellatea_X_Group_L_X_sp.	Flagellated cells
1651	0	0	0	0	0	0	0	10	0	0	0	0	0	0	0	Eukaryota	Rhizaria	Cercozoa	Filosa-Imbricatea	Filosa-Imbricatea_X	Novel-clade-2	Novel-clade-2_X	Novel-clade-2_X_sp.	Flagellated cells
1652	0	0	0	0	4	0	0	0	0	0	0	0	0	0	0	Eukaryota	Hacrobia	Haptophyta	Prymnesiophyceae	Prymnesiales	Prymnesiaceae	Prymnesium	Prymnesium_sp.	Flagellated cells
1653	0	0	0	0	0	0	0	0	0	0	0	5	4	0	0	Eukaryota	Rhizaria	Cercozoa	Filosa-Imbricatea	Marimonadida	Marimonadida_X	Pseudopirsonia	Pseudopirsonia_mucosa	Flagellated cells
1654	0	0	0	25	1	5	0	0	0	0	0	0	0	0	0	Eukaryota	Alveolata	Apicomplexa	Gregarinomorphea	Cryptogregarinorida	Cryptosporidiidae	Cryptosporidium2	Cryptosporidium2_sp.	Flagellated cells
1655	0	0	0	0	0	0	0	0	10	0	0	0	24	0	0	Eukaryota	Rhizaria	Cercozoa	Filosa-Imbricatea	Filosa-Imbricatea_X	Novel-clade-2	Novel-clade-2_X	Novel-clade-2_X_sp.	Flagellated cells
1656	0	0	0	0	0	0	5	0	0	0	0	0	0	0	0	Eukaryota	Stramenopiles	Ochrophyta	Bacillariophyta	Bacillariophyta_X	Radial-centric-basal-Coscinodiscophyceae	Actinocyclus	Actinocyclus_curvatulus	Bacillariophyta (Stramenopiles)
1657	0	0	0	0	0	0	0	0	0	0	16	0	0	0	0	Eukaryota	Archaeplastida	Streptophyta	Embryophyceae	Embryophyceae_X	Embryophyceae_XX	Ostryopsis	Ostryopsis_davidiana	Flagellated cells
1658	0	0	0	0	0	0	100	83	213	0	47	0	0	16	0	Eukaryota	Archaeplastida	Rhodophyta	Stylonematophyceae	Porphyridiales-2	Stylonematales-Group-I	Purpureofilum	Purpureofilum_apyrenoidigerum	Flagellated cells
1659	9	0	0	0	0	0	0	0	0	0	0	0	0	0	0	Eukaryota	Alveolata	Dinoflagellata	Dinophyceae	Gymnodiniales	Gymnodiniaceae	Gyrodinium	Gyrodinium_sp.	Dinoflagellata (Alveolata)
1660	0	0	0	14	14	20	0	0	0	0	0	0	0	0	0	Eukaryota	Archaeplastida	Chlorophyta	Pyramimonadales	Pyramimonadales_X	Pyramimonadales_XX	Cymbomonas	Cymbomonas_tetramitiformis	Flagellated cells
1661	0	0	6	27	74	11	0	0	0	0	0	0	0	0	0	Eukaryota	Archaeplastida	Chlorophyta	Pyramimonadales	Pyramimonadales_X	Pyramimonadales_XX	Pterosperma	Pterosperma_cristatum	Flagellated cells
1662	0	0	0	0	0	0	6	0	0	0	0	0	0	0	0	Eukaryota	Stramenopiles	Ochrophyta	Bacillariophyta	Bacillariophyta_X	Polar-centric-Mediophyceae	Extubocellulus	Extubocellulus_spinifer	Bacillariophyta (Stramenopiles)
1663	412	0	0	4	0	0	0	0	0	0	0	0	0	0	0	Eukaryota	Alveolata	Ciliophora	Phyllopharyngea	Suctoria	Acinetidae_2	Acineta_1	Acineta_1_sp.	Ciliophora (Alveolata)
1664	0	0	0	50	0	88	0	0	0	0	0	0	0	0	0	Eukaryota	Alveolata	Dinoflagellata	Dinophyceae	Peridiniales	Thoracosphaeraceae	Thoracosphaeraceae_X	Thoracosphaeraceae_X_sp.	Dinoflagellata (Alveolata)
1665	0	0	0	0	0	0	0	0	0	0	0	0	0	14	0	Eukaryota	Rhizaria	Cercozoa	Filosa-Thecofilosea	Ventricleftida	Ventrifissuridae	Ventrifissuridae_X	Ventrifissuridae_X_sp.	Flagellated cells
1666	0	0	0	0	0	0	85	64	0	0	0	0	0	0	0	Eukaryota	Alveolata	Dinoflagellata	Dinophyceae	Torodiniales	Torodiniaceae	Torodinium	Torodinium_robustum	Dinoflagellata (Alveolata)
1669	0	0	0	0	0	0	0	0	70	0	0	0	0	0	0	Eukaryota	Rhizaria	Cercozoa	Cercozoa_X	Cercozoa_XX	Cercozoa_XXX	Cercozoa_XXXX	Cercozoa_XXXX_sp.	Flagellated cells
1671	0	0	0	0	0	8	0	0	0	0	0	0	0	0	0	Eukaryota	Alveolata	Dinoflagellata	Syndiniales	Dino-Group-II	Dino-Group-II-Clade-17	Dino-Group-II-Clade-17_X	Dino-Group-II-Clade-17_X_sp.	Dinoflagellata (Alveolata)
1672	0	0	0	0	0	0	17	0	0	0	0	0	0	0	0	Eukaryota	Opisthokonta	Choanoflagellida	Choanoflagellatea	Acanthoecida	Stephanoecidae_Group_D	Stephanoecidae_Group_D_X	Stephanoecidae_Group_D_X_sp.	Flagellated cells
1673	0	0	0	0	0	0	0	45	0	0	0	0	0	0	0	Eukaryota	Rhizaria	Cercozoa	Filosa-Imbricatea	Filosa-Imbricatea_X	Novel-clade-2	Novel-clade-2_X	Novel-clade-2_X_sp.	Flagellated cells
1674	0	0	0	0	0	0	76	4	0	0	0	0	0	0	0	Eukaryota	Stramenopiles	Opalozoa	MAST-3	MAST-3F	MAST-3F_X	MAST-3F_XX	MAST-3F_XX_sp.	Bacillariophyta (Stramenopiles)
1675	0	0	0	0	0	0	0	0	0	0	0	0	0	0	4	Eukaryota	Alveolata	Dinoflagellata	Dinophyceae	Prorocentrales	Prorocentraceae	Prorocentrum	Prorocentrum_sp.	Dinoflagellata (Alveolata)
1676	0	0	0	0	0	0	0	0	41	20	0	0	0	0	0	Eukaryota	Rhizaria	Cercozoa	Cercozoa_X	Cercozoa_XX	Cercozoa_XXX	Cercozoa_XXXX	Cercozoa_XXXX_sp.	Flagellated cells
1677	0	0	5	11	0	16	0	0	0	0	0	0	0	0	0	Eukaryota	Apusozoa	Apusomonadidae	Apusomonadidae_Group-1	Apusomonadidae_Group-1_X	Apusomonadidae_Group-1_XX	Amastigomonas	Amastigomonas_mutabilis	Flagellated cells
1678	0	0	0	0	0	0	0	0	3	0	3	0	0	0	0	Eukaryota	Alveolata	Apicomplexa	Gregarinomorphea	Cryptogregarinorida	Cryptosporidiidae	Cryptosporidium2	Cryptosporidium2_sp.	Flagellated cells
1682	0	0	0	0	0	0	16	0	0	3	0	0	0	0	0	Eukaryota	Alveolata	Dinoflagellata	Syndiniales	Dino-Group-II	Dino-Group-II-Clade-3	Dino-Group-II-Clade-3_X	Dino-Group-II-Clade-3_X_sp.	Dinoflagellata (Alveolata)
1683	0	0	0	158	0	0	0	0	0	0	0	0	0	0	0	Eukaryota	Stramenopiles	Ochrophyta	Bacillariophyta	Bacillariophyta_X	Polar-centric-Mediophyceae	Chaetoceros	Chaetoceros_lorenzianus_1	Bacillariophyta (Stramenopiles)
1684	0	0	0	0	0	0	0	0	19	0	0	0	0	0	0	Eukaryota	Archaeplastida	Chlorophyta	Chlorophyceae	Sphaeropleales	Sphaeropleales_X	Desmodesmus	Desmodesmus_communis	Flagellated cells
1685	0	0	0	0	0	0	45	0	0	0	0	0	0	0	0	Eukaryota	Rhizaria	Cercozoa	Filosa-Imbricatea	Filosa-Imbricatea_X	Novel-clade-2	Novel-clade-2_X	Novel-clade-2_X_sp.	Flagellated cells
1686	0	0	0	0	0	0	39	0	0	0	0	0	0	0	0	Eukaryota	Alveolata	Ciliophora	Spirotrichea	Tintinnida	Stenosemellidae	Stenosemella	Stenosemella_pacifica	Ciliophora (Alveolata)
1687	0	0	0	0	0	0	0	0	0	0	0	0	0	13	0	Eukaryota	Archaeplastida	Streptophyta	Embryophyceae	Embryophyceae_X	Embryophyceae_XX	Pinus	Pinus_taeda	Flagellated cells
1688	0	0	0	0	0	0	4	7	0	0	0	0	0	0	0	Eukaryota	Opisthokonta	Choanoflagellida	Choanoflagellatea	Choanoflagellatea_X	Choanoflagellatea_X_Group_L	Choanoflagellatea_X_Group_L_X	Choanoflagellatea_X_Group_L_X_sp.	Flagellated cells
1689	0	0	0	0	0	0	0	0	36	0	36	56	0	0	0	Eukaryota	Rhizaria	Cercozoa	Filosa-Thecofilosea	Ebriida	TAGIRI1-lineage	TAGIRI1-lineage_X	TAGIRI1-lineage_X_sp.	Flagellated cells
1690	0	0	0	6	0	2	0	0	0	0	0	0	0	0	0	Eukaryota	Stramenopiles	Opalozoa	MAST-12	MAST-12_X	MAST-12_XX	MAST-12_XXX	MAST-12_XXX_sp.	Bacillariophyta (Stramenopiles)
1691	0	0	0	0	0	0	4	0	0	0	0	0	0	0	0	Eukaryota	Alveolata	Apicomplexa	Gregarinomorphea	Cryptogregarinorida	Cryptosporidiidae	Cryptosporidium2	Cryptosporidium2_sp.	Flagellated cells
1692	0	0	6	13	0	0	0	0	0	0	0	0	0	0	0	Eukaryota	Alveolata	Dinoflagellata	Syndiniales	Dino-Group-II	Dino-Group-II-Clade-4	Dino-Group-II-Clade-4_X	Dino-Group-II-Clade-4_X_sp.	Dinoflagellata (Alveolata)
1694	0	48	0	0	0	0	0	0	0	0	0	0	0	0	0	Eukaryota	Stramenopiles	Opalozoa	MAST-12	MAST-12A	MAST-12A_X	MAST-12A_XX	MAST-12A_XX_sp.	Bacillariophyta (Stramenopiles)
1696	6	0	0	0	0	0	0	0	0	0	0	0	0	0	0	Eukaryota	Archaeplastida	Streptophyta	Embryophyceae	Embryophyceae_X	Embryophyceae_XX	Pinus	Pinus_taeda	Flagellated cells
1697	0	0	0	0	0	0	0	0	2	0	6	0	0	0	0	Eukaryota	Rhizaria	Foraminifera	Monothalamids	Monothalamids_Clade-Y	Reticulomyxidae	Haplomyxa	Haplomyxa_saranae	Flagellated cells
1698	0	0	0	0	0	0	0	0	0	53	0	0	0	0	56	Eukaryota	Alveolata	Dinoflagellata	Dinophyceae	Gymnodiniales	Gymnodiniaceae	Gyrodinium	Gyrodinium_fusiforme	Dinoflagellata (Alveolata)
1699	0	0	0	35	97	160	0	0	0	0	0	0	0	0	0	Eukaryota	Alveolata	Dinoflagellata	Dinophyceae	Gymnodiniales	Gymnodiniaceae	Gymnodinium	Gymnodinium_sp.	Dinoflagellata (Alveolata)
1700	74	0	0	0	0	0	0	0	0	0	0	0	0	0	0	Eukaryota	Alveolata	Dinoflagellata	Dinophyceae	Gymnodiniales	Gymnodiniaceae	Gyrodinium	Gyrodinium_fusiforme	Dinoflagellata (Alveolata)
1701	8	0	0	0	0	10	0	0	0	0	0	0	0	0	0	Eukaryota	Rhizaria	Cercozoa	Filosa-Thecofilosea	Filosa-Thecofilosea_X	Mataza-lineage	Mataza-lineage_X	Mataza-lineage_X_sp.	Flagellated cells
1702	0	0	0	0	0	0	0	0	0	0	33	0	0	0	0	Eukaryota	Rhizaria	Cercozoa	Filosa-Imbricatea	Thaumatomonadida	Thaumatomonadidae	Reckertia	Reckertia_filosa	Flagellated cells
1703	0	0	0	12	0	0	0	0	0	0	0	0	0	0	0	Eukaryota	Opisthokonta	Choanoflagellida	Choanoflagellatea	Acanthoecida	Stephanoecidae_Group_D	Stephanoecidae_Group_D_X	Stephanoecidae_Group_D_X_sp.	Flagellated cells
1704	0	0	0	5	0	6	0	0	0	0	0	0	0	0	0	Eukaryota	Rhizaria	Cercozoa	Filosa-Imbricatea	Filosa-Imbricatea_X	Novel-clade-2	Novel-clade-2_X	Novel-clade-2_X_sp.	Flagellated cells
1705	0	0	0	10	0	13	0	0	0	0	0	0	0	0	0	Eukaryota	Alveolata	Dinoflagellata	Dinophyceae	Gymnodiniales	Gymnodiniaceae	Amphidinium	Amphidinium_herdmanii	Dinoflagellata (Alveolata)
1707	0	0	0	0	0	20	0	0	0	0	0	0	0	0	0	Eukaryota	Stramenopiles	Ochrophyta	Bacillariophyta	Bacillariophyta_X	Polar-centric-Mediophyceae	Odontella	Odontella_aurita	Bacillariophyta (Stramenopiles)
1708	0	0	0	0	0	0	0	0	14	0	0	0	129	23	0	Eukaryota	Rhizaria	Cercozoa	Filosa-Thecofilosea	Filosa-Thecofilosea_X	Mataza-lineage	Mataza-lineage_X	Mataza-lineage_X_sp.	Flagellated cells
1709	0	0	0	0	0	0	13	30	4	0	0	0	0	0	0	Eukaryota	Hacrobia	Centroheliozoa	Centroheliozoa_X	Pterocystida	Pterocystida_X	Pterocystida_XX	Pterocystida_XX_sp.	Flagellated cells
1711	0	0	0	0	0	0	0	0	10	0	0	0	0	0	0	Eukaryota	Rhizaria	Cercozoa	Filosa-Thecofilosea	Filosa-Thecofilosea_X	Mataza-lineage	Mataza-lineage_X	Mataza-lineage_X_sp.	Flagellated cells
1713	0	0	0	0	0	0	0	2	0	0	9	0	0	0	0	Eukaryota	Rhizaria	Cercozoa	Filosa-Thecofilosea	Ventricleftida	Ventrifissuridae	Ventrifissura	Ventrifissura_artocarpoidea	Flagellated cells
1714	0	6	0	24	11	0	0	0	0	0	0	0	0	0	0	Eukaryota	Opisthokonta	Mesomycetozoa	Ichthyosporea	Ichthyosphonida	Abeoformidae_Group_MAIP_1	Abeoformidae_Group_MAIP_1_X	Abeoformidae_Group_MAIP_1_X_sp.	Flagellated cells
1715	0	0	4	0	0	0	0	0	0	0	0	0	0	0	0	Eukaryota	Stramenopiles	Ochrophyta	Bacillariophyta	Bacillariophyta_X	Polar-centric-Mediophyceae	Chaetoceros	Chaetoceros_decipiens	Bacillariophyta (Stramenopiles)
1716	0	0	0	0	0	0	0	0	0	0	3	23	7	0	0	Eukaryota	Rhizaria	Cercozoa	Cercozoa_X	Cercozoa_XX	Cercozoa_XXX	Cercozoa_XXXX	Cercozoa_XXXX_sp.	Flagellated cells
1717	0	0	0	0	0	22	0	0	0	0	0	0	0	0	0	Eukaryota	Stramenopiles	Ochrophyta	Bolidophyceae	Parmales	Parmales_env_2	Parmales_env_2_X	Parmales_env_2_X_sp.	Bacillariophyta (Stramenopiles)
1718	0	89	50	0	0	0	0	0	0	0	0	0	0	0	0	Eukaryota	Alveolata	Dinoflagellata	Dinophyceae	Prorocentrales	Prorocentraceae	Prorocentrum	Prorocentrum_triestinum	Dinoflagellata (Alveolata)
1719	0	0	0	0	0	0	0	0	25	11	0	0	0	0	0	Eukaryota	Alveolata	Apicomplexa	Gregarinomorphea	Eugregarinorida	Eugregarinorida_EUG1	Eugregarinorida_EUG1_X	Eugregarinorida_EUG1_X_sp.	Flagellated cells
1720	0	0	0	0	0	0	0	17	0	0	6	0	0	0	0	Eukaryota	Rhizaria	Cercozoa	Filosa-Thecofilosea	Ebriida	TAGIRI1-lineage	TAGIRI1-lineage_X	TAGIRI1-lineage_X_sp.	Flagellated cells
1721	0	0	0	0	9	45	0	0	0	0	0	0	0	0	0	Eukaryota	Stramenopiles	Ochrophyta	Bacillariophyta	Bacillariophyta_X	Radial-centric-basal-Coscinodiscophyceae	Proboscia	Proboscia_indica	Bacillariophyta (Stramenopiles)
1724	0	0	0	0	0	0	0	10	0	0	8	0	0	0	0	Eukaryota	Alveolata	Ciliophora	CONThreeP	CONThreeP_X	CONThreeP_XX	Askenasia	Askenasia_sp.	Ciliophora (Alveolata)
1725	0	0	0	10	0	0	0	0	0	0	0	0	0	0	0	Eukaryota	Rhizaria	Cercozoa	Filosa-Imbricatea	Marimonadida	Marimonadida_X	Marimonadida_XX	Marimonadida_XX_sp.	Flagellated cells
1726	0	0	0	0	0	64	0	0	0	0	0	0	0	0	0	Eukaryota	Rhizaria	Cercozoa	Filosa-Thecofilosea	Cryomonadida	Cryothecomonas-lineage	Cryothecomonas	Cryothecomonas_aestivalis	Flagellated cells
1727	0	0	0	0	0	0	0	0	0	0	0	0	2	0	0	Eukaryota	Rhizaria	Cercozoa	Filosa-Thecofilosea	Ventricleftida	CCW10-lineage	CCW10-lineage_X	CCW10-lineage_X_sp.	Flagellated cells
1728	0	0	0	0	0	0	15	0	0	22	0	0	0	0	0	Eukaryota	Stramenopiles	Ochrophyta	Bacillariophyta	Bacillariophyta_X	Raphid-pennate	Pseudo-nitzschia	Pseudo-nitzschia_sp.	Bacillariophyta (Stramenopiles)
1729	0	0	0	0	0	7	0	0	0	0	0	0	0	0	0	Eukaryota	Opisthokonta	Choanoflagellida	Choanoflagellatea	Choanoflagellatea_X	Choanoflagellatea_X_Group_L	Choanoflagellatea_X_Group_L_X	Choanoflagellatea_X_Group_L_X_sp.	Flagellated cells
1730	0	0	0	0	0	0	59	0	11	10	0	46	4	7	0	Eukaryota	Alveolata	Apicomplexa	Gregarinomorphea	Gregarines	Gregarines_X	Selenidium1	Selenidium1_serpulae	Flagellated cells
1731	0	0	0	0	0	0	0	15	0	0	0	0	0	0	0	Eukaryota	Hacrobia	Haptophyta	Prymnesiophyceae	Prymnesiales	Chrysochromulinaceae	Chrysochromulina	Chrysochromulina_sp.	Flagellated cells
1732	0	0	0	0	0	0	34	3	22	0	0	0	0	0	0	Eukaryota	Stramenopiles	Ochrophyta	Bacillariophyta	Bacillariophyta_X	Polar-centric-Mediophyceae	Chaetoceros	Chaetoceros_lorenzianus_2	Bacillariophyta (Stramenopiles)
1733	0	0	0	0	0	0	0	22	0	0	0	0	0	0	0	Eukaryota	Rhizaria	Cercozoa	Cercozoa_X	Cercozoa_XX	Cercozoa_XXX	Cercozoa_XXXX	Cercozoa_XXXX_sp.	Flagellated cells
1734	0	0	0	0	0	0	0	0	0	0	0	0	3	13	0	Eukaryota	Rhizaria	Cercozoa	Filosa-Granofilosea	Cryptofilida	Nanofilidae	Nanofila	Nanofila_sp.	Flagellated cells
1735	41	0	0	0	0	0	0	0	0	0	0	0	0	0	0	Eukaryota	Alveolata	Apicomplexa	Gregarinomorphea	Gregarines	Gregarines_X	Selenidium1	Selenidium1_serpulae	Flagellated cells
1737	0	0	0	8	0	0	0	0	0	0	0	0	0	0	0	Eukaryota	Alveolata	Dinoflagellata	Syndiniales	Dino-Group-II	Dino-Group-II-Clade-4	Dino-Group-II-Clade-4_X	Dino-Group-II-Clade-4_X_sp.	Dinoflagellata (Alveolata)
1740	0	0	8	0	0	0	0	0	0	0	0	0	0	0	0	Eukaryota	Alveolata	Apicomplexa	Gregarinomorphea	Eugregarinorida	Eugregarinorida_EUG1	Eugregarinorida_EUG1_X	Eugregarinorida_EUG1_X_sp.	Flagellated cells
1741	0	0	0	0	0	0	0	7	25	0	0	0	0	0	0	Eukaryota	Stramenopiles	Opalozoa	MAST-12	MAST-12A	MAST-12A_X	MAST-12A_XX	MAST-12A_XX_sp.	Bacillariophyta (Stramenopiles)
1743	0	0	0	0	0	0	5	0	0	0	0	5	0	0	0	Eukaryota	Rhizaria	Cercozoa	Filosa-Imbricatea	Marimonadida	Marimonadida_X	Pseudopirsonia	Pseudopirsonia_mucosa	Flagellated cells
1744	0	5	0	0	0	0	0	0	0	0	0	0	0	0	0	Eukaryota	Alveolata	Ciliophora	Spirotrichea	Strombidiida	Strombidiidae_K	Strombidium_K	Strombidium_K_sp.	Ciliophora (Alveolata)
1745	0	0	0	0	0	0	0	0	0	0	0	10	0	8	0	Eukaryota	Rhizaria	Cercozoa	Cercozoa_X	Cercozoa_XX	Cercozoa_XXX	Cercozoa_XXXX	Cercozoa_XXXX_sp.	Flagellated cells
1746	0	5	3	6	7	13	0	0	0	0	0	0	0	0	0	Eukaryota	Alveolata	Dinoflagellata	Syndiniales	Dino-Group-II	Dino-Group-II-Clade-5	Dino-Group-II-Clade-5_X	Dino-Group-II-Clade-5_X_sp.	Dinoflagellata (Alveolata)
1747	0	0	0	0	0	0	4	0	0	0	0	0	0	0	0	Eukaryota	Rhizaria	Cercozoa	Filosa-Thecofilosea	Filosa-Thecofilosea_X	Mataza-lineage	Mataza-lineage_X	Mataza-lineage_X_sp.	Flagellated cells
1749	0	0	0	0	0	0	0	0	0	0	0	0	0	19	0	Eukaryota	Rhizaria	Cercozoa	Filosa-Imbricatea	Marimonadida	Marimonadida_X	Marimonadida_XX	Marimonadida_XX_sp.	Flagellated cells
1750	0	0	0	7	0	0	0	0	0	0	0	0	0	0	0	Eukaryota	Rhizaria	Cercozoa	Filosa-Thecofilosea	Ebriida	TAGIRI1-lineage	TAGIRI1-lineage_X	TAGIRI1-lineage_X_sp.	Flagellated cells
1751	0	0	0	8	14	0	0	0	0	0	0	0	0	0	0	Eukaryota	Archaeplastida	Chlorophyta	Pyramimonadales	Pyramimonadales_X	Pyramimonadales_XX	Pterosperma	Pterosperma_sp.	Flagellated cells
1752	0	0	0	0	0	0	8	1	4	0	0	0	0	0	0	Eukaryota	Alveolata	Ciliophora	Oligohymenophorea	OLIGO5	OLIGO5_X	OLIGO5_XX	OLIGO5_XX_sp.	Ciliophora (Alveolata)
1753	0	0	0	0	7	0	0	0	0	0	0	0	0	0	0	Eukaryota	Archaeplastida	Chlorophyta	Pyramimonadales	Pyramimonadales_X	Pyramimonadales_XX	Pterosperma	Pterosperma_sp.	Flagellated cells
1754	0	0	7	66	0	0	0	0	0	0	0	0	0	0	0	Eukaryota	Rhizaria	Cercozoa	Filosa-Thecofilosea	Ebriida	Ebriidae	Ebria	Ebria_tripartita	Flagellated cells
1756	0	0	0	0	0	0	0	0	4	0	60	0	29	8	0	Eukaryota	Alveolata	Dinoflagellata	Syndiniales	Dino-Group-II	Dino-Group-II-Clade-18	Dino-Group-II-Clade-18_X	Dino-Group-II-Clade-18_X_sp.	Dinoflagellata (Alveolata)
1758	13	0	0	0	0	0	0	0	0	0	0	0	0	0	0	Eukaryota	Rhizaria	Cercozoa	Filosa-Thecofilosea	Ebriida	Botuliformidae	Botuliforma	Botuliforma_benthica	Flagellated cells
1759	0	0	0	0	0	0	0	27	0	0	0	0	0	0	0	Eukaryota	Rhizaria	Cercozoa	Filosa-Thecofilosea	Cryomonadida	Cryothecomonas-lineage	Cryothecomonas	Cryothecomonas_aestivalis	Flagellated cells
1760	0	0	0	0	0	0	0	0	0	32	0	0	0	0	39	Eukaryota	Alveolata	Dinoflagellata	Dinophyceae	Dinophyceae_X	Dinophyceae_XX	Dinophyceae_XXX	Dinophyceae_XXX_sp.	Dinoflagellata (Alveolata)
1762	0	0	0	15	0	0	0	0	0	0	0	0	0	0	0	Eukaryota	Alveolata	Dinoflagellata	Dinophyceae	Dinophysiales	Amphisoleniaceae	Amphisoleniaceae_X	Amphisoleniaceae_X_sp.	Dinoflagellata (Alveolata)
1763	0	0	4	0	0	0	0	0	0	0	0	0	0	0	0	Eukaryota	Alveolata	Dinoflagellata	Syndiniales	Dino-Group-I	Dino-Group-I-Clade-4	Euduboscquella	Euduboscquella_sp.	Dinoflagellata (Alveolata)
1764	0	35	0	0	0	0	0	0	0	0	0	0	0	0	0	Eukaryota	Alveolata	Dinoflagellata	Dinophyceae	Dinophysiales	Amphisoleniaceae	Amphisoleniaceae_X	Amphisoleniaceae_X_sp.	Dinoflagellata (Alveolata)
1765	0	0	0	0	0	0	96	59	18	0	9	0	0	0	8	Eukaryota	Alveolata	Dinoflagellata	Syndiniales	Dino-Group-II	Dino-Group-II-Clade-1	Dino-Group-II-Clade-1_X	Dino-Group-II-Clade-1_X_sp.	Dinoflagellata (Alveolata)
1766	0	0	0	0	0	0	0	0	0	0	6	0	0	0	0	Eukaryota	Rhizaria	Cercozoa	Filosa-Thecofilosea	Filosa-Thecofilosea_X	Mataza-lineage	Mataza	Mataza_hastifera	Flagellated cells
1769	22	0	0	0	0	0	0	0	0	0	0	0	0	0	0	Eukaryota	Alveolata	Dinoflagellata	Dinophyceae	Gymnodiniales	Gymnodiniaceae	Gyrodinium	Gyrodinium_dominans	Dinoflagellata (Alveolata)
1771	0	0	135	57	0	0	0	0	0	0	0	0	0	0	0	Eukaryota	Stramenopiles	Ochrophyta	Bacillariophyta	Bacillariophyta_X	Polar-centric-Mediophyceae	Arcocellulus	Arcocellulus_cornucervis	Bacillariophyta (Stramenopiles)
1773	0	0	0	0	0	0	0	0	0	16	0	0	0	0	0	Eukaryota	Opisthokonta	Choanoflagellida	Choanoflagellatea	Acanthoecida	Stephanoecidae_Group_D	Stephanoecidae_Group_D_X	Stephanoecidae_Group_D_X_sp.	Flagellated cells
1774	0	0	0	0	0	0	0	0	0	0	0	0	0	0	7	Eukaryota	Stramenopiles	Ochrophyta	Bacillariophyta	Bacillariophyta_X	Radial-centric-basal-Coscinodiscophyceae	Guinardia	Guinardia_delicatula	Bacillariophyta (Stramenopiles)
1775	0	25	0	0	0	0	0	0	0	0	0	0	0	0	0	Eukaryota	Stramenopiles	Opalozoa	MAST-12	MAST-12A	MAST-12A_X	MAST-12A_XX	MAST-12A_XX_sp.	Bacillariophyta (Stramenopiles)
1776	0	0	0	0	0	0	7	0	0	0	0	0	0	0	0	Eukaryota	Alveolata	Dinoflagellata	Syndiniales	Dino-Group-I	Dino-Group-I-Clade-1	Dino-Group-I-Clade-1_X	Dino-Group-I-Clade-1_X_sp.	Dinoflagellata (Alveolata)
1777	0	0	0	0	0	0	0	0	8	0	0	0	0	0	0	Eukaryota	Rhizaria	Cercozoa	Filosa-Imbricatea	Marimonadida	Marimonadida_X	Marimonadida_XX	Marimonadida_XX_sp.	Flagellated cells
1778	0	0	0	0	0	0	0	0	0	0	0	6	0	0	0	Eukaryota	Archaeplastida	Chlorophyta	Pyramimonadales	Pyramimonadales_X	Pyramimonadales_XX	Pterosperma	Pterosperma_sp.	Flagellated cells
1779	0	0	0	23	60	7	0	0	0	0	0	0	0	0	0	Eukaryota	Rhizaria	Cercozoa	Filosa-Thecofilosea	Cryomonadida	Protaspa-lineage	Protaspa-lineage_X	Protaspa-lineage_X_sp.	Flagellated cells
1780	0	0	0	0	0	0	0	10	5	0	0	0	0	0	0	Eukaryota	Rhizaria	Cercozoa	Filosa-Thecofilosea	Filosa-Thecofilosea_X	Novel-Clade-4	Novel-Clade-4_X	Novel-Clade-4_X_sp.	Flagellated cells
1781	0	0	4	4	0	0	0	0	0	0	0	0	0	0	0	Eukaryota	Stramenopiles	Ochrophyta	Bacillariophyta	Bacillariophyta_X	Polar-centric-Mediophyceae	Chaetoceros	Chaetoceros_curvisetus_1	Bacillariophyta (Stramenopiles)
1782	24	0	0	0	0	0	0	0	0	0	0	0	0	0	0	Eukaryota	Rhizaria	Cercozoa	Filosa-Imbricatea	Filosa-Imbricatea_X	Novel-clade-2	Novel-clade-2_X	Novel-clade-2_X_sp.	Flagellated cells
1783	0	0	0	0	0	0	29	0	0	0	0	0	0	0	0	Eukaryota	Rhizaria	Radiolaria	Acantharea	Acantharea_X	Acantharea_XX	Acantharea_XXX	Acantharea_XXX_sp.	Flagellated cells
1784	0	8	6	0	0	0	0	0	0	0	0	0	0	0	0	Eukaryota	Alveolata	Dinoflagellata	Dinophyceae	Dinophyceae_X	Dinophyceae_XX	Dinophyceae_XXX	Dinophyceae_XXX_sp.	Dinoflagellata (Alveolata)
1785	0	0	0	0	0	0	9	0	0	0	0	0	0	0	0	Eukaryota	Alveolata	Dinoflagellata	Syndiniales	Dino-Group-II	Dino-Group-II-Clade-3	Dino-Group-II-Clade-3_X	Dino-Group-II-Clade-3_X_sp.	Dinoflagellata (Alveolata)
1786	0	0	26	11	6	1	0	0	0	0	0	0	0	0	0	Eukaryota	Stramenopiles	Ochrophyta	Bacillariophyta	Bacillariophyta_X	Polar-centric-Mediophyceae	Chaetoceros	Chaetoceros_affinis	Bacillariophyta (Stramenopiles)
1787	0	0	0	0	0	0	42	0	0	0	0	0	0	0	0	Eukaryota	Alveolata	Dinoflagellata	Syndiniales	Dino-Group-II	Dino-Group-II-Clade-7	Dino-Group-II-Clade-7_X	Dino-Group-II-Clade-7_X_sp.	Dinoflagellata (Alveolata)
1788	0	0	25	95	17	0	0	0	0	0	0	0	0	0	0	Eukaryota	Alveolata	Dinoflagellata	Syndiniales	Dino-Group-II	Dino-Group-II-Clade-30	Dino-Group-II-Clade-30_X	Dino-Group-II-Clade-30_X_sp.	Dinoflagellata (Alveolata)
1790	35	0	0	0	0	0	0	0	0	0	0	0	0	0	0	Eukaryota	Alveolata	Dinoflagellata	Dinophyceae	Dinophyceae_X	Dinophyceae_XX	Dinophyceae_XXX	Dinophyceae_XXX_sp.	Dinoflagellata (Alveolata)
1791	0	0	0	0	0	0	18	7	0	15	7	5	10	352	144	Eukaryota	Alveolata	Ciliophora	Spirotrichea	Strombidiida	Tontoniidae_A	Laboea	Laboea_strobila	Ciliophora (Alveolata)
1792	0	117	600	458	102	58	0	0	0	0	0	0	0	0	0	Eukaryota	Stramenopiles	Ochrophyta	Bacillariophyta	Bacillariophyta_X	Polar-centric-Mediophyceae	Minutocellus	Minutocellus_polymorphus	Bacillariophyta (Stramenopiles)
1793	0	0	0	1263	195	22	0	0	0	0	0	0	0	0	0	Eukaryota	Rhizaria	Cercozoa	Endomyxa-Phytomyxea	Phagomyxida	Phagomyxidae	Phagomyxa	Phagomyxa_sp.	Flagellated cells
1794	0	5	239	0	0	0	0	0	0	0	0	0	0	0	0	Eukaryota	Stramenopiles	Ochrophyta	Bacillariophyta	Bacillariophyta_X	Polar-centric-Mediophyceae	Thalassiosira	Thalassiosira_allenii	Bacillariophyta (Stramenopiles)
1795	0	0	4	0	0	0	0	0	0	0	0	0	0	0	0	Eukaryota	Rhizaria	Cercozoa	Filosa-Thecofilosea	Ebriida	TAGIRI1-lineage	TAGIRI1-lineage_X	TAGIRI1-lineage_X_sp.	Flagellated cells
1796	0	0	0	0	0	14	0	0	0	0	0	0	0	0	0	Eukaryota	Rhizaria	Cercozoa	Filosa-Granofilosea	Filosa-Granofilosea_X	Massiteriidae	Massiteriidae_X	Massiteriidae_X_sp.	Flagellated cells
1797	0	0	0	0	0	0	5	29	0	0	0	0	6	4	0	Eukaryota	Apusozoa	Apusomonadidae	Apusomonadidae_Group-1	Apusomonadidae_Group-1_X	Apusomonadidae_Group-1_XX	Apusomonadidae_Group-1_XXX	Apusomonadidae_Group-1_XXX_sp.	Flagellated cells
1798	0	0	0	0	0	0	4	5	0	0	0	0	0	0	0	Eukaryota	Stramenopiles	Ochrophyta	Bacillariophyta	Bacillariophyta_X	Polar-centric-Mediophyceae	Thalassiosira	Thalassiosira_punctigera	Bacillariophyta (Stramenopiles)
1799	0	0	0	53	0	0	0	0	0	0	0	0	0	0	0	Eukaryota	Alveolata	Dinoflagellata	Syndiniales	Dino-Group-II	Dino-Group-II-Clade-1	Dino-Group-II-Clade-1_X	Dino-Group-II-Clade-1_X_sp.	Dinoflagellata (Alveolata)
1800	0	0	0	0	0	0	0	0	0	0	0	48	0	0	0	Eukaryota	Rhizaria	Cercozoa	Filosa-Thecofilosea	Cryomonadida	Protaspa-lineage	Protaspa-lineage_X	Protaspa-lineage_X_sp.	Flagellated cells
1801	0	0	0	0	3	11	0	0	0	0	0	0	0	0	0	Eukaryota	Stramenopiles	Opalozoa	MAST-3	MAST-3D	MAST-3D_X	MAST-3D_XX	MAST-3D_XX_sp.	Bacillariophyta (Stramenopiles)
1802	0	0	0	0	0	0	0	0	0	0	0	0	0	12	0	Eukaryota	Stramenopiles	Opalozoa	MAST-3	MAST-3J	MAST-3J_X	MAST-3J_XX	MAST-3J_XX_sp.	Bacillariophyta (Stramenopiles)
1803	0	5	0	7	4	9	0	0	0	0	0	0	0	0	0	Eukaryota	Stramenopiles	Opalozoa	MAST-12	MAST-12A	MAST-12A_X	MAST-12A_XX	MAST-12A_XX_sp.	Bacillariophyta (Stramenopiles)
1804	3	0	0	4	0	0	0	0	0	0	0	0	0	0	0	Eukaryota	Opisthokonta	Mesomycetozoa	Ichthyosporea	Ichthyosphonida	Abeoformidae_Group_MAIP_1	Abeoformidae_Group_MAIP_1_X	Abeoformidae_Group_MAIP_1_X_sp.	Flagellated cells
1805	0	25	0	0	0	88	0	0	0	0	0	0	0	0	0	Eukaryota	Stramenopiles	Ochrophyta	Bacillariophyta	Bacillariophyta_X	Polar-centric-Mediophyceae	Detonula	Detonula_pumila	Bacillariophyta (Stramenopiles)
1806	0	0	12	0	0	0	0	0	0	0	0	0	0	0	0	Eukaryota	Alveolata	Dinoflagellata	Dinophyceae	Peridiniales	Protoperidiniaceae	Protoperidinium	Protoperidinium_bipes	Dinoflagellata (Alveolata)
1807	0	9	9	31	10	97	0	0	0	0	0	0	0	0	0	Eukaryota	Archaeplastida	Rhodophyta	Stylonematophyceae	Porphyridiales-2	Stylonematales-Group-I	Purpureofilum	Purpureofilum_apyrenoidigerum	Flagellated cells
1808	0	0	0	0	0	0	12	5	1	0	0	0	0	0	0	Eukaryota	Alveolata	Dinoflagellata	Dinophyceae	Dinophyceae_X	Dinophyceae_XX	Dinophyceae_XXX	Dinophyceae_XXX_sp.	Dinoflagellata (Alveolata)
1809	6	0	0	0	0	0	0	0	0	0	0	0	0	0	0	Eukaryota	Archaeplastida	Chlorophyta	Pyramimonadales	Pyramimonadales_X	Pyramimonadales_XX	Pterosperma	Pterosperma_sp.	Flagellated cells
1810	0	0	0	0	0	0	0	0	9	0	0	0	0	0	0	Eukaryota	Alveolata	Apicomplexa	Gregarinomorphea	Eugregarinorida	Eugregarinorida_EUG1	Eugregarinorida_EUG1_X	Eugregarinorida_EUG1_X_sp.	Flagellated cells
1811	0	0	0	38	0	300	0	0	0	0	0	0	0	0	0	Eukaryota	Alveolata	Dinoflagellata	Syndiniales	Dino-Group-I	Dino-Group-I-Clade-5	Dino-Group-I-Clade-5_X	Dino-Group-I-Clade-5_X_sp.	Dinoflagellata (Alveolata)
1812	0	0	0	0	0	0	0	0	0	0	0	0	0	9	0	Eukaryota	Hacrobia	Haptophyta	Haptophyta_Clade_HAP3	Haptophyta_Clade_HAP3_X	Haptophyta_Clade_HAP3_XX	Haptophyta_Clade_HAP3_XXX	Haptophyta_Clade_HAP3_XXX_sp.	Flagellated cells
1813	0	0	0	0	0	0	0	148	67	0	60	0	0	0	0	Eukaryota	Rhizaria	Cercozoa	Filosa-Imbricatea	Filosa-Imbricatea_X	Novel-clade-2	Novel-clade-2_X	Novel-clade-2_X_sp.	Flagellated cells
1814	0	0	1	9	6	52	0	0	0	0	0	0	0	0	0	Eukaryota	Archaeplastida	Rhodophyta	Stylonematophyceae	Porphyridiales-2	Stylonematales-Group-I	Purpureofilum	Purpureofilum_apyrenoidigerum	Flagellated cells
1815	0	0	0	0	0	0	38	0	37	0	0	0	0	0	0	Eukaryota	Archaeplastida	Chlorophyta	Trebouxiophyceae	Chlorellales	Chlorellales_X	Picochlorum	Picochlorum_sp.	Flagellated cells
1816	0	0	0	0	0	0	12	0	0	0	0	0	0	0	0	Eukaryota	Hacrobia	Haptophyta	Prymnesiophyceae	Prymnesiales	Chrysochromulinaceae	Chrysochromulina	Chrysochromulina_sp.	Flagellated cells
1817	0	0	12	0	0	0	0	0	0	0	0	0	0	0	0	Eukaryota	Alveolata	Dinoflagellata	Dinophyceae	Gonyaulacales	Gonyaulacaceae	Gonyaulax	Gonyaulax_spinifera	Dinoflagellata (Alveolata)
1818	0	0	0	0	0	0	0	0	0	0	0	0	0	0	36	Eukaryota	Alveolata	Dinoflagellata	Dinophyceae	Dinophyceae_X	Dinophyceae_XX	Dinophyceae_XXX	Dinophyceae_XXX_sp.	Dinoflagellata (Alveolata)
1820	0	0	0	0	112	146	0	0	0	0	0	0	0	0	0	Eukaryota	Alveolata	Dinoflagellata	Dinophyceae	Gymnodiniales	Kareniaceae	Karenia	Karenia_brevis	Dinoflagellata (Alveolata)
1821	0	0	0	0	0	0	13	14	31	18	13	18	0	4	0	Eukaryota	Rhizaria	Cercozoa	Endomyxa-Phytomyxea	Phagomyxida	Phagomyxidae	Phagomyxa	Phagomyxa_sp.	Flagellated cells
1822	0	0	0	0	0	0	0	27	18	0	16	0	0	0	0	Eukaryota	Archaeplastida	Rhodophyta	Stylonematophyceae	Porphyridiales-2	Stylonematales-Group-I	Purpureofilum	Purpureofilum_apyrenoidigerum	Flagellated cells
1823	0	0	0	0	0	0	36	17	0	0	0	0	0	0	0	Eukaryota	Alveolata	Dinoflagellata	Syndiniales	Dino-Group-II	Dino-Group-II-Clade-1	Dino-Group-II-Clade-1_X	Dino-Group-II-Clade-1_X_sp.	Dinoflagellata (Alveolata)
1824	0	0	0	0	0	0	0	3	0	0	4	0	0	0	0	Eukaryota	Alveolata	Dinoflagellata	Dinophyceae	Prorocentrales	Prorocentraceae	Prorocentrum	Prorocentrum_bimaculatum	Dinoflagellata (Alveolata)
1825	0	0	0	0	0	0	0	0	2	0	2	0	0	0	0	Eukaryota	Rhizaria	Cercozoa	Filosa-Granofilosea	Limnofilida	Limnofilidae	Limnofila	Limnofila_anglica	Flagellated cells
1826	0	34	0	0	0	0	0	0	0	0	0	0	0	0	0	Eukaryota	Alveolata	Dinoflagellata	Syndiniales	Dino-Group-II	Dino-Group-II-Clade-2	Dino-Group-II-Clade-2_X	Dino-Group-II-Clade-2_X_sp.	Dinoflagellata (Alveolata)
1827	10	26	0	0	0	0	0	0	0	0	0	0	0	0	0	Eukaryota	Stramenopiles	Ochrophyta	Bacillariophyta	Bacillariophyta_X	Raphid-pennate	Pseudo-nitzschia	Pseudo-nitzschia_delicatissima	Bacillariophyta (Stramenopiles)
1831	64	0	0	16	0	0	0	0	0	0	0	0	0	0	0	Eukaryota	Rhizaria	Cercozoa	Filosa-Thecofilosea	Filosa-Thecofilosea_X	Mataza-lineage	Mataza-lineage_X	Mataza-lineage_X_sp.	Flagellated cells
1832	0	0	20	0	0	0	0	0	0	0	0	0	0	0	0	Eukaryota	Rhizaria	Cercozoa	Endomyxa-Phytomyxea	Phagomyxida	Phagomyxidae	Phagomyxa	Phagomyxa_sp.	Flagellated cells
1833	0	0	0	0	0	0	0	0	0	0	0	0	0	0	7	Eukaryota	Archaeplastida	Streptophyta	Embryophyceae	Embryophyceae_X	Embryophyceae_XX	Pinus	Pinus_taeda	Flagellated cells
1835	0	2	0	0	0	0	0	0	0	0	0	0	0	0	0	Eukaryota	Rhizaria	Cercozoa	Filosa-Thecofilosea	Ebriida	TAGIRI1-lineage	TAGIRI1-lineage_X	TAGIRI1-lineage_X_sp.	Flagellated cells
1836	5	22	0	0	0	0	0	0	0	0	0	0	0	0	0	Eukaryota	Opisthokonta	Mesomycetozoa	Ichthyosporea	Ichthyosphonida	Abeoformidae_Group_MAIP_1	Abeoformidae_Group_MAIP_1_X	Abeoformidae_Group_MAIP_1_X_sp.	Flagellated cells
1837	0	0	0	0	0	0	0	0	14	0	0	0	0	0	0	Eukaryota	Alveolata	Ciliophora	Oligohymenophorea	Oligohymenophorea_X	Oligohymenophorea_XX	Cinetochilum	Cinetochilum_ovale	Ciliophora (Alveolata)
1838	0	0	0	0	3	28	0	0	0	0	0	0	0	0	0	Eukaryota	Alveolata	Dinoflagellata	Syndiniales	Dino-Group-II	Dino-Group-II-Clade-1	Dino-Group-II-Clade-1_X	Dino-Group-II-Clade-1_X_sp.	Dinoflagellata (Alveolata)
1839	0	0	128	143	0	0	0	0	0	0	0	0	0	0	0	Eukaryota	Alveolata	Dinoflagellata	Dinophyceae	Gymnodiniales	Gymnodiniaceae	Gymnodinium	Gymnodinium_dorsalisulcum	Dinoflagellata (Alveolata)
1840	0	0	0	0	0	0	0	0	0	0	0	0	0	18	0	Eukaryota	Hacrobia	Haptophyta	Prymnesiophyceae	Prymnesiales	Chrysochromulinaceae	Chrysochromulina	Chrysochromulina_sp.	Flagellated cells
1841	0	3	3	14	7	4	0	0	0	0	0	0	0	0	0	Eukaryota	Archaeplastida	Chlorophyta	Pyramimonadales	Pyramimonadales_X	Pyramimonadales_XX	Pyramimonas	Pyramimonas_australis	Flagellated cells
1843	0	0	0	0	0	0	0	0	0	12	0	0	0	0	0	Eukaryota	Alveolata	Dinoflagellata	Dinophyceae	Gonyaulacales	Ceratiaceae	Tripos	Tripos_furca	Dinoflagellata (Alveolata)
1844	0	0	0	0	0	0	5	0	0	0	0	0	0	0	0	Eukaryota	Rhizaria	Cercozoa	Filosa-Imbricatea	Marimonadida	Marimonadida_X	Marimonadida_XX	Marimonadida_XX_sp.	Flagellated cells
1845	0	0	0	7	4	4	0	0	0	0	0	0	0	0	0	Eukaryota	Rhizaria	Cercozoa	Cercozoa_X	Cercozoa_XX	Cercozoa_XXX	Cercozoa_XXXX	Cercozoa_XXXX_sp.	Flagellated cells
1846	0	0	0	0	0	9	0	0	0	0	0	0	0	0	0	Eukaryota	Stramenopiles	Ochrophyta	Bacillariophyta	Bacillariophyta_X	Radial-centric-basal-Coscinodiscophyceae	Actinoptychus	Actinoptychus_sp.	Bacillariophyta (Stramenopiles)
1847	0	0	0	0	0	0	35	0	0	0	0	0	0	0	0	Eukaryota	Rhizaria	Cercozoa	Filosa-Thecofilosea	Cryomonadida	Protaspa-lineage	Protaspa-lineage_X	Protaspa-lineage_X_sp.	Flagellated cells
1849	3	0	0	0	0	0	0	0	0	0	0	0	0	0	0	Eukaryota	Rhizaria	Cercozoa	Filosa-Imbricatea	Thaumatomonadida	Thaumatomonadidae	Thaumatomastix	Thaumatomastix_sp.	Flagellated cells
1850	0	0	0	0	0	0	0	0	0	0	12	0	0	0	0	Eukaryota	Rhizaria	Cercozoa	Filosa-Thecofilosea	Cryomonadida	Protaspa-lineage	Protaspa-lineage_X	Protaspa-lineage_X_sp.	Flagellated cells
1851	0	0	0	0	0	0	0	0	15	0	0	0	0	0	0	Eukaryota	Rhizaria	Cercozoa	Filosa-Thecofilosea	Ventricleftida	Ventricleftida_X	Ventricleftida_XX	Ventricleftida_XX_sp.	Flagellated cells
1852	0	0	0	0	0	0	0	12	21	0	10	0	0	0	0	Eukaryota	Archaeplastida	Rhodophyta	Stylonematophyceae	Porphyridiales-2	Stylonematales-Group-I	Purpureofilum	Purpureofilum_apyrenoidigerum	Flagellated cells
1854	0	0	0	0	12	0	0	0	0	0	0	0	0	0	0	Eukaryota	Hacrobia	Haptophyta	Haptophyta_X	Haptophyta_XX	Haptophyta_XXX	Haptophyta_XXXX	Haptophyta_XXXX_sp.	Flagellated cells
1855	0	0	0	0	0	0	0	0	0	0	0	0	0	0	11	Eukaryota	Opisthokonta	Choanoflagellida	Choanoflagellatea	Acanthoecida	Stephanoecidae_Group_D	Stephanoecidae_Group_D_X	Stephanoecidae_Group_D_X_sp.	Flagellated cells
1856	0	0	0	9	0	0	0	0	0	0	0	0	0	0	0	Eukaryota	Opisthokonta	Choanoflagellida	Choanoflagellatea	Choanoflagellatea_X	Choanoflagellatea_X_Group_L	Choanoflagellatea_X_Group_L_X	Choanoflagellatea_X_Group_L_X_sp.	Flagellated cells
1857	0	0	0	11	0	0	0	0	0	0	0	0	0	0	0	Eukaryota	Rhizaria	Cercozoa	Endomyxa-Phytomyxea	Phagomyxida	Phagomyxidae	Phagomyxa	Phagomyxa_sp.	Flagellated cells
1858	0	0	0	0	0	0	0	0	0	0	0	0	8	0	0	Eukaryota	Rhizaria	Cercozoa	Filosa-Imbricatea	Marimonadida	Marimonadida_X	Pseudopirsonia	Pseudopirsonia_mucosa	Flagellated cells
1859	0	0	0	0	0	0	0	0	0	0	0	50	0	0	0	Eukaryota	Alveolata	Apicomplexa	Gregarinomorphea	Eugregarinorida	Eugregarinorida_EUG2	Eugregarinorida_EUG2_X	Eugregarinorida_EUG2_X_sp.	Flagellated cells
1860	0	0	0	0	0	0	0	0	0	0	0	14	4	0	0	Eukaryota	Stramenopiles	Ochrophyta	Bacillariophyta	Bacillariophyta_X	Raphid-pennate	Cymbella	Cymbella_similis	Bacillariophyta (Stramenopiles)
1861	0	0	0	0	0	0	0	0	8	0	8	0	0	0	0	Eukaryota	Alveolata	Dinoflagellata	Dinophyceae	Gymnodiniales	Gymnodiniaceae	Amphidinium	Amphidinium_herdmanii	Dinoflagellata (Alveolata)
1862	0	0	0	19	0	0	0	0	0	0	0	0	0	0	0	Eukaryota	Alveolata	Apicomplexa	Gregarinomorphea	Eugregarinorida	Eugregarinorida_EUG2	Eugregarinorida_EUG2_X	Eugregarinorida_EUG2_X_sp.	Flagellated cells
1863	0	0	0	0	0	0	32	70	25	0	0	0	0	0	0	Eukaryota	Alveolata	Dinoflagellata	Syndiniales	Dino-Group-III	Dino-Group-III_X	Dino-Group-III_XX	Dino-Group-III_XX_sp.	Dinoflagellata (Alveolata)
1864	0	0	0	13	0	0	0	0	0	0	0	0	0	0	0	Eukaryota	Rhizaria	Cercozoa	Endomyxa-Phytomyxea	Phagomyxida	Phagomyxidae	Phagomyxa	Phagomyxa_sp.	Flagellated cells
1865	0	43	0	0	0	0	0	0	0	0	0	0	0	0	0	Eukaryota	Alveolata	Dinoflagellata	Dinophyceae	Dinophyceae_X	Dinophyceae_XX	Dinophyceae_XXX	Dinophyceae_XXX_sp.	Dinoflagellata (Alveolata)
1866	0	0	0	0	0	0	0	0	0	0	0	0	7	23	16	Eukaryota	Rhizaria	Cercozoa	Filosa	Filosa_X	Filosa_XX	Discomonas	Discomonas_retusa	Flagellated cells
1867	0	0	0	0	0	0	0	0	0	0	0	10	2	21	0	Eukaryota	Rhizaria	Cercozoa	Filosa-Thecofilosea	Cryomonadida	Protaspa-lineage	Protaspa	Protaspa_grandis	Flagellated cells
1868	0	0	0	0	0	0	0	0	11	88	16	286	10	0	0	Eukaryota	Rhizaria	Cercozoa	Filosa-Thecofilosea	Filosa-Thecofilosea_X	Filosa-Thecofilosea_XX	Filosa-Thecofilosea_XXX	Filosa-Thecofilosea_XXX_sp.	Flagellated cells
1870	0	0	0	10	0	0	0	0	0	0	0	0	0	0	0	Eukaryota	Archaeplastida	Chlorophyta	Trebouxiophyceae	Chlorellales	Chlorellales_X	Picochlorum	Picochlorum_sp.	Flagellated cells
1871	0	0	0	0	0	0	0	80	0	0	5	0	0	10	0	Eukaryota	Rhizaria	Cercozoa	Filosa-Imbricatea	Thaumatomonadida	Thaumatomonadidae	Thaumatomastix	Thaumatomastix_salina	Flagellated cells
1872	0	0	0	0	0	0	0	0	0	0	0	0	20	0	4	Eukaryota	Alveolata	Dinoflagellata	Syndiniales	Dino-Group-II	Dino-Group-II-Clade-12	Dino-Group-II-Clade-12_X	Dino-Group-II-Clade-12_X_sp.	Dinoflagellata (Alveolata)
1874	0	0	0	0	0	0	0	0	0	0	0	0	0	0	1568	Eukaryota	Rhizaria	Cercozoa	Filosa-Thecofilosea	Cryomonadida	Cryothecomonas-lineage	Cryothecomonas	Cryothecomonas_aestivalis	Flagellated cells
1875	0	0	0	0	0	0	21	0	0	0	0	0	0	0	0	Eukaryota	Hacrobia	Haptophyta	Prymnesiophyceae	Phaeocystales	Phaeocystaceae	Phaeocystis	Phaeocystis_cordata	Flagellated cells
1876	0	0	0	0	6	0	0	0	0	0	0	0	0	0	0	Eukaryota	Stramenopiles	Ochrophyta	Bacillariophyta	Bacillariophyta_X	Polar-centric-Mediophyceae	Polar-centric-Mediophyceae_X	Polar-centric-Mediophyceae_X_sp.	Bacillariophyta (Stramenopiles)
1877	0	0	0	0	0	0	3	0	0	0	0	0	0	0	0	Eukaryota	Alveolata	Apicomplexa	Gregarinomorphea	Eugregarinorida	Lecudinidae	Lecudina	Lecudina_phyllochaetopteri	Flagellated cells
1880	0	0	0	0	0	0	0	0	0	0	3	0	2	0	0	Eukaryota	Apusozoa	Hilomonadea	Planomonadida	Planomonadidae	Planomonadidae_Group-1	Planomonadidae_Group-1_X	Planomonadidae_Group-1_X_sp.	Flagellated cells
1881	0	0	0	0	0	6	0	0	0	0	0	0	0	0	0	Eukaryota	Stramenopiles	Stramenopiles_X	Stramenopiles_XX	Stramenopiles_XXX	Stramenopiles_XXXX	Stramenopiles_XXXXX	Stramenopiles_XXXXX_sp.	Bacillariophyta (Stramenopiles)
1882	0	0	186	102	56	0	0	0	0	0	0	0	0	0	0	Eukaryota	Alveolata	Dinoflagellata	Syndiniales	Dino-Group-I	Dino-Group-I-Clade-1	Dino-Group-I-Clade-1_X	Dino-Group-I-Clade-1_X_sp.	Dinoflagellata (Alveolata)
1884	129	198	695	209	116	49	0	0	0	0	0	0	0	0	0	Eukaryota	Alveolata	Dinoflagellata	Dinophyceae	Peridiniales	Heterocapsaceae	Heterocapsa	Heterocapsa_nei/rotundata	Dinoflagellata (Alveolata)
1885	0	0	0	0	0	0	0	7	0	0	0	0	0	0	0	Eukaryota	Stramenopiles	Ochrophyta	Bacillariophyta	Bacillariophyta_X	Polar-centric-Mediophyceae	Helicotheca	Helicotheca_tamesis	Bacillariophyta (Stramenopiles)
1886	51	0	0	0	0	0	0	0	0	0	0	0	0	0	0	Eukaryota	Alveolata	Dinoflagellata	Dinophyceae	Gymnodiniales	Gymnodiniaceae	Gyrodinium	Gyrodinium_sp.	Dinoflagellata (Alveolata)
1887	0	0	0	0	0	0	0	43	0	0	9	0	0	0	0	Eukaryota	Rhizaria	Cercozoa	Filosa-Thecofilosea	Ventricleftida	CCW10-lineage	CCW10-lineage_X	CCW10-lineage_X_sp.	Flagellated cells
1888	0	0	0	0	0	0	41	0	0	0	0	0	0	0	0	Eukaryota	Alveolata	Dinoflagellata	Dinophyceae	Gymnodiniales	Gymnodiniaceae	Gyrodinium	Gyrodinium_spirale	Dinoflagellata (Alveolata)
1889	0	0	0	0	0	0	0	17	12	0	0	0	0	0	0	Eukaryota	Archaeplastida	Chlorophyta	Pyramimonadales	Pyramimonadales_X	Pyramimonadales_XX	Pyramimonas	Pyramimonas_australis	Flagellated cells
1890	6	0	0	0	0	0	0	0	0	0	0	0	0	0	0	Eukaryota	Alveolata	Dinoflagellata	Syndiniales	Dino-Group-II	Dino-Group-II-Clade-30	Dino-Group-II-Clade-30_X	Dino-Group-II-Clade-30_X_sp.	Dinoflagellata (Alveolata)
1891	0	0	0	0	0	0	0	0	0	0	0	0	0	24	0	Eukaryota	Alveolata	Dinoflagellata	Syndiniales	Dino-Group-I	Dino-Group-I-Clade-1	Dino-Group-I-Clade-1_X	Dino-Group-I-Clade-1_X_sp.	Dinoflagellata (Alveolata)
1892	0	0	0	0	0	0	0	167	208	12	9	15	0	0	0	Eukaryota	Stramenopiles	Ochrophyta	Bacillariophyta	Bacillariophyta_X	Polar-centric-Mediophyceae	Biddulphia	Biddulphia_reticulum	Bacillariophyta (Stramenopiles)
1893	0	0	0	0	0	0	16	0	4	5	7	0	0	0	0	Eukaryota	Rhizaria	Cercozoa	Filosa-Imbricatea	Euglyphida	Euglyphida_X	Euglyphida_XX	Euglyphida_XX_sp.	Flagellated cells
1894	0	0	0	0	0	12	0	0	0	0	0	0	0	0	0	Eukaryota	Rhizaria	Cercozoa	Filosa-Thecofilosea	Ventricleftida	CCW10-lineage	CCW10-lineage_X	CCW10-lineage_X_sp.	Flagellated cells
1896	0	0	0	0	0	0	264	0	0	0	0	0	0	0	0	Eukaryota	Alveolata	Dinoflagellata	Dinophyceae	Gymnodiniales	Gymnodiniaceae	Gymnodinium	Gymnodinium_sp.	Dinoflagellata (Alveolata)
1897	0	0	0	0	0	0	117	159	96	16	32	0	0	0	11	Eukaryota	Hacrobia	Cryptophyta	Cryptophyceae	Cryptomonadales	Cryptomonadales_X	Geminigera	Geminigera_cryophila	Flagellated cells
1898	0	0	0	0	0	0	8	0	0	0	0	0	0	0	0	Eukaryota	Opisthokonta	Choanoflagellida	Choanoflagellatea	Acanthoecida	Stephanoecidae_Group_D	Stephanoecidae_Group_D_X	Stephanoecidae_Group_D_X_sp.	Flagellated cells
1899	0	0	0	0	4	24	0	0	0	0	0	0	0	0	0	Eukaryota	Archaeplastida	Rhodophyta	Stylonematophyceae	Porphyridiales-2	Stylonematales-Group-I	Purpureofilum	Purpureofilum_apyrenoidigerum	Flagellated cells
1900	0	0	0	8	0	0	0	0	0	0	0	0	0	0	0	Eukaryota	Alveolata	Dinoflagellata	Syndiniales	Dino-Group-II	Dino-Group-II-Clade-3	Dino-Group-II-Clade-3_X	Dino-Group-II-Clade-3_X_sp.	Dinoflagellata (Alveolata)
1901	60	0	0	0	0	0	0	0	0	0	0	0	0	0	0	Eukaryota	Alveolata	Dinoflagellata	Dinophyceae	Dinophyceae_X	Dinophyceae_XX	Dinophyceae_XXX	Dinophyceae_XXX_sp.	Dinoflagellata (Alveolata)
1902	0	0	0	0	0	0	5	0	0	0	0	0	0	0	0	Eukaryota	Opisthokonta	Choanoflagellida	Choanoflagellatea	Acanthoecida	Stephanoecidae_Group_D	Stephanoecidae_Group_D_X	Stephanoecidae_Group_D_X_sp.	Flagellated cells
1903	0	0	0	0	16	0	0	0	0	0	0	0	0	0	0	Eukaryota	Rhizaria	Radiolaria	Acantharea	Acantharea_X	Acantharea_XX	Trizona	Trizona_brandti	Flagellated cells
1904	0	0	8	2	0	11	0	0	0	0	0	0	0	0	0	Eukaryota	Archaeplastida	Rhodophyta	Stylonematophyceae	Porphyridiales-2	Stylonematales-Group-I	Purpureofilum	Purpureofilum_apyrenoidigerum	Flagellated cells
1905	0	0	0	0	0	0	0	0	8	0	9	0	0	0	2	Eukaryota	Opisthokonta	Choanoflagellida	Choanoflagellatea	Craspedida	Monosigidae_Group_B	Lagenoeca	Lagenoeca_antarctica	Flagellated cells
1906	0	0	0	0	0	0	0	0	0	0	0	0	6	0	0	Eukaryota	Rhizaria	Cercozoa	Filosa-Thecofilosea	Filosa-Thecofilosea_X	Mataza-lineage	Mataza-lineage_X	Mataza-lineage_X_sp.	Flagellated cells
1907	0	0	0	0	0	0	19	0	0	0	0	0	0	0	0	Eukaryota	Alveolata	Dinoflagellata	Syndiniales	Dino-Group-II	Dino-Group-II-Clade-14	Dino-Group-II-Clade-14_X	Dino-Group-II-Clade-14_X_sp.	Dinoflagellata (Alveolata)
1908	0	0	0	0	0	0	16	0	0	0	0	0	0	0	0	Eukaryota	Stramenopiles	Ochrophyta	Bacillariophyta	Bacillariophyta_X	Polar-centric-Mediophyceae	Odontella	Odontella_aurita	Bacillariophyta (Stramenopiles)
1909	0	0	0	0	0	0	176	122	22	54	0	0	42	87	755	Eukaryota	Alveolata	Dinoflagellata	Dinophyceae	Peridiniales	Heterocapsaceae	Heterocapsa	Heterocapsa_nei/rotundata	Dinoflagellata (Alveolata)
1910	0	0	0	0	0	0	22	47	30	24	0	0	7	71	11	Eukaryota	Stramenopiles	Opalozoa	MAST-3	MAST-3E	MAST-3E_X	MAST-3E_XX	MAST-3E_XX_sp.	Bacillariophyta (Stramenopiles)
1911	0	0	0	0	0	0	0	4	0	0	0	0	0	24	0	Eukaryota	Stramenopiles	Ochrophyta	Bacillariophyta	Bacillariophyta_X	Raphid-pennate	Navicula	Navicula_lanceolata	Bacillariophyta (Stramenopiles)
1912	0	0	0	0	12	0	0	0	0	0	0	0	0	0	0	Eukaryota	Rhizaria	Cercozoa	Filosa-Thecofilosea	Filosa-Thecofilosea_X	Mataza-lineage	Mataza-lineage_X	Mataza-lineage_X_sp.	Flagellated cells
1913	0	0	0	0	0	0	0	4	3	0	2	0	0	0	0	Eukaryota	Rhizaria	Cercozoa	Cercozoa_X	Cercozoa_XX	Cercozoa_XXX	Cercozoa_XXXX	Cercozoa_XXXX_sp.	Flagellated cells
1914	0	0	0	9	0	0	0	0	0	0	0	0	0	0	0	Eukaryota	Rhizaria	Cercozoa	Cercozoa_X	Cercozoa_XX	Cercozoa_XXX	Cercozoa_XXXX	Cercozoa_XXXX_sp.	Flagellated cells
1915	0	0	3	17	3	5	0	0	0	0	0	0	0	0	0	Eukaryota	Alveolata	Apicomplexa	Gregarinomorphea	Gregarines	Gregarines_X	Selenidium1	Selenidium1_sp.	Flagellated cells
1916	0	0	0	0	0	0	0	15	0	0	0	0	0	0	0	Eukaryota	Rhizaria	Cercozoa	Filosa-Thecofilosea	Ebriida	Botuliformidae	Botuliforma	Botuliforma_benthica	Flagellated cells
1917	0	0	0	0	0	0	0	0	8	0	0	0	0	0	0	Eukaryota	Rhizaria	Cercozoa	Filosa-Imbricatea	Thaumatomonadida	Thaumatomonadidae	Reckertia	Reckertia_filosa	Flagellated cells
1918	0	0	0	0	0	0	0	0	0	0	32	13	0	0	0	Eukaryota	Rhizaria	Cercozoa	Filosa-Thecofilosea	Filosa-Thecofilosea_X	Mataza-lineage	Mataza-lineage_X	Mataza-lineage_X_sp.	Flagellated cells
1919	0	0	0	0	0	0	0	0	24	0	0	0	0	0	0	Eukaryota	Stramenopiles	Opalozoa	MAST-12	MAST-12A	MAST-12A_X	MAST-12A_XX	MAST-12A_XX_sp.	Bacillariophyta (Stramenopiles)
1920	11	0	0	9	0	0	0	0	0	0	0	0	0	0	0	Eukaryota	Stramenopiles	Ochrophyta	Bacillariophyta	Bacillariophyta_X	Polar-centric-Mediophyceae	Biddulphia	Biddulphia_reticulum	Bacillariophyta (Stramenopiles)
1921	0	0	0	0	0	0	0	0	0	25	0	22	0	19	0	Eukaryota	Rhizaria	Cercozoa	Filosa-Thecofilosea	Cryomonadida	Protaspa-lineage	Protaspa-lineage_X	Protaspa-lineage_X_sp.	Flagellated cells
1923	0	0	0	0	0	0	0	0	0	0	4	0	0	0	0	Eukaryota	Alveolata	Dinoflagellata	Dinophyceae	Peridiniales	Diplopsalidaceae	Preperidinium	Preperidinium_meunieri	Dinoflagellata (Alveolata)
1924	0	0	0	0	0	0	31	35	0	0	0	0	2	32	0	Eukaryota	Alveolata	Dinoflagellata	Syndiniales	Dino-Group-III	Dino-Group-III_X	Dino-Group-III_XX	Dino-Group-III_XX_sp.	Dinoflagellata (Alveolata)
1925	0	0	0	0	0	0	0	0	6	0	0	0	0	0	0	Eukaryota	Rhizaria	Cercozoa	Filosa-Imbricatea	Thaumatomonadida	Thaumatomonadidae	Thaumatomastix	Thaumatomastix_sp.	Flagellated cells
1926	0	0	0	0	0	0	154	0	0	0	0	0	0	0	0	Eukaryota	Alveolata	Dinoflagellata	Syndiniales	Dino-Group-I	Dino-Group-I-Clade-5	Dino-Group-I-Clade-5_X	Dino-Group-I-Clade-5_X_sp.	Dinoflagellata (Alveolata)
1927	0	0	0	0	0	0	0	0	0	70	0	0	0	0	35	Eukaryota	Stramenopiles	Ochrophyta	Bacillariophyta	Bacillariophyta_X	Polar-centric-Mediophyceae	Chaetoceros	Chaetoceros_eibenii	Bacillariophyta (Stramenopiles)
1928	0	3	0	13	4	0	0	0	0	0	0	0	0	0	0	Eukaryota	Alveolata	Dinoflagellata	Syndiniales	Dino-Group-II	Dino-Group-II-Clade-12	Dino-Group-II-Clade-12_X	Dino-Group-II-Clade-12_X_sp.	Dinoflagellata (Alveolata)
1929	0	0	0	0	0	0	43	0	14	0	0	0	12	4	76	Eukaryota	Rhizaria	Cercozoa	Filosa-Imbricatea	Filosa-Imbricatea_X	Novel-clade-2	Novel-clade-2_X	Novel-clade-2_X_sp.	Flagellated cells
1931	0	0	8	0	0	0	0	0	0	0	0	0	0	0	0	Eukaryota	Alveolata	Dinoflagellata	Dinophyceae	Dinophyceae_X	Dinophyceae_XX	Dinophyceae_XXX	Dinophyceae_XXX_sp.	Dinoflagellata (Alveolata)
1932	0	0	0	0	0	0	0	0	0	0	0	0	0	0	20	Eukaryota	Alveolata	Dinoflagellata	Dinophyceae	Gymnodiniales	Gymnodiniaceae	Gyrodinium	Gyrodinium_sp.	Dinoflagellata (Alveolata)
1933	0	0	0	0	0	6	0	0	0	0	0	0	0	0	0	Eukaryota	Alveolata	Dinoflagellata	Syndiniales	Dino-Group-II	Dino-Group-II-Clade-12	Dino-Group-II-Clade-12_X	Dino-Group-II-Clade-12_X_sp.	Dinoflagellata (Alveolata)
1934	0	0	0	0	0	0	43	19	48	8	0	0	0	0	0	Eukaryota	Stramenopiles	Ochrophyta	Bacillariophyta	Bacillariophyta_X	Polar-centric-Mediophyceae	Thalassiosira	Thalassiosira_punctigera	Bacillariophyta (Stramenopiles)
1935	0	0	0	0	0	0	34	50	40	0	77	0	0	0	0	Eukaryota	Alveolata	Dinoflagellata	Dinophyceae	Peridiniales	Heterocapsaceae	Heterocapsa	Heterocapsa_pygmaea	Dinoflagellata (Alveolata)
1936	0	0	0	0	0	0	155	152	66	13	12	0	0	0	26	Eukaryota	Alveolata	Dinoflagellata	Dinophyceae	Dinophyceae_X	Dinophyceae_XX	Dinophyceae_XXX	Dinophyceae_XXX_sp.	Dinoflagellata (Alveolata)
1937	0	0	0	0	0	0	0	0	0	0	6	0	0	0	0	Eukaryota	Archaeplastida	Chlorophyta	Chlorophyceae	Sphaeropleales	Sphaeropleales_X	Scenedesmus	Scenedesmus_abundans	Flagellated cells
1938	0	11	0	10	0	0	0	0	0	0	0	0	0	0	0	Eukaryota	Stramenopiles	Opalozoa	MAST-12	MAST-12A	MAST-12A_X	MAST-12A_XX	MAST-12A_XX_sp.	Bacillariophyta (Stramenopiles)
1939	0	0	0	0	0	0	0	37	0	0	0	0	0	0	0	Eukaryota	Rhizaria	Cercozoa	Filosa-Thecofilosea	Filosa-Thecofilosea_X	Mataza-lineage	Mataza-lineage_X	Mataza-lineage_X_sp.	Flagellated cells
1940	0	0	0	0	0	0	0	0	0	29	0	0	0	0	40	Eukaryota	Alveolata	Dinoflagellata	Dinophyceae	Gymnodiniales	Gymnodiniaceae	Gyrodinium	Gyrodinium_sp.	Dinoflagellata (Alveolata)
1941	0	0	0	0	10	0	0	0	0	0	0	0	0	0	0	Eukaryota	Stramenopiles	Ochrophyta	Bacillariophyta	Bacillariophyta_X	Polar-centric-Mediophyceae	Chaetoceros	Chaetoceros_anastomosans	Bacillariophyta (Stramenopiles)
1943	0	0	0	2	11	26	0	0	0	0	0	0	0	0	0	Eukaryota	Alveolata	Dinoflagellata	Syndiniales	Dino-Group-II	Dino-Group-II-Clade-42	Dino-Group-II-Clade-42_X	Dino-Group-II-Clade-42_X_sp.	Dinoflagellata (Alveolata)
1944	0	0	0	0	131	536	0	0	0	0	0	0	0	0	0	Eukaryota	Alveolata	Dinoflagellata	Dinophyceae	Gonyaulacales	Ceratiaceae	Tripos	Tripos_horridus	Dinoflagellata (Alveolata)
1945	0	0	22	0	0	0	0	0	0	0	0	0	0	0	0	Eukaryota	Rhizaria	Cercozoa	Filosa-Thecofilosea	Cryomonadida	Cryomonadida_X	Cryomonadida_XX	Cryomonadida_XX_sp.	Flagellated cells
1946	0	0	0	0	3	15	0	0	0	0	0	0	0	0	0	Eukaryota	Stramenopiles	Opalozoa	MAST-12	MAST-12A	MAST-12A_X	MAST-12A_XX	MAST-12A_XX_sp.	Bacillariophyta (Stramenopiles)
1947	0	0	0	0	0	0	32	0	0	0	0	0	0	0	0	Eukaryota	Alveolata	Dinoflagellata	Dinophyceae	Gymnodiniales	Gymnodiniaceae	Lepidodinium	Lepidodinium_chlorophorum	Dinoflagellata (Alveolata)
1948	0	0	0	0	0	0	0	0	0	97	61	0	0	0	0	Eukaryota	Rhizaria	Cercozoa	Filosa-Imbricatea	Thaumatomonadida	Peregriniidae	Peregrinia	Peregrinia_clavideferens	Flagellated cells
1949	0	0	0	0	0	0	33	143	0	23	18	0	30	95	15	Eukaryota	Alveolata	Dinoflagellata	Dinophyceae	Dinophyceae_X	Dinophyceae_XX	Dinophyceae_XXX	Dinophyceae_XXX_sp.	Dinoflagellata (Alveolata)
1951	0	0	0	0	0	0	0	8	0	0	0	0	0	0	0	Eukaryota	Alveolata	Dinoflagellata	Dinophyceae	Gymnodiniales	Gymnodiniaceae	Gymnodinium	Gymnodinium_dorsalisulcum	Dinoflagellata (Alveolata)
1952	127	0	2	0	9	8	0	0	0	0	0	0	0	0	0	Eukaryota	Rhizaria	Cercozoa	Filosa-Thecofilosea	Filosa-Thecofilosea_X	Filosa-Thecofilosea_XX	Filosa-Thecofilosea_XXX	Filosa-Thecofilosea_XXX_sp.	Flagellated cells
1953	0	18	0	14	0	0	0	0	0	0	0	0	0	0	0	Eukaryota	Stramenopiles	Ochrophyta	Bacillariophyta	Bacillariophyta_X	Raphid-pennate	Cymbella	Cymbella_similis	Bacillariophyta (Stramenopiles)
1954	0	7	0	0	0	0	0	0	0	0	0	0	0	0	0	Eukaryota	Rhizaria	Cercozoa	Cercozoa_X	Cercozoa_XX	Cercozoa_XXX	Cercozoa_XXXX	Cercozoa_XXXX_sp.	Flagellated cells
1955	0	0	0	0	10	3	0	0	0	0	0	0	0	0	0	Eukaryota	Alveolata	Dinoflagellata	Dinophyceae	Peridiniales	Protoperidiniaceae	Protoperidinium	Protoperidinium_depressum	Dinoflagellata (Alveolata)
1957	0	9	0	0	0	0	0	0	0	0	0	0	0	0	0	Eukaryota	Stramenopiles	Ochrophyta	Bacillariophyta	Bacillariophyta_X	Raphid-pennate	Raphid-pennate_X	Raphid-pennate_X_sp.	Bacillariophyta (Stramenopiles)
1958	0	0	0	0	0	11	0	0	0	0	0	0	0	0	0	Eukaryota	Opisthokonta	Choanoflagellida	Choanoflagellatea	Acanthoecida	Stephanoecidae_Group_H	Stephanoecidae_Group_H_X	Stephanoecidae_Group_H_X_sp.	Flagellated cells
1959	0	0	0	0	0	0	9	0	0	0	0	0	0	0	0	Eukaryota	Alveolata	Dinoflagellata	Syndiniales	Dino-Group-II	Dino-Group-II-Clade-46	Dino-Group-II-Clade-46_X	Dino-Group-II-Clade-46_X_sp.	Dinoflagellata (Alveolata)
1960	0	0	0	29	0	0	0	0	0	0	0	0	0	0	0	Eukaryota	Rhizaria	Cercozoa	Filosa-Thecofilosea	Ebriida	TAGIRI1-lineage	TAGIRI1-lineage_X	TAGIRI1-lineage_X_sp.	Flagellated cells
1961	0	0	15	0	0	0	0	0	0	0	0	0	0	0	0	Eukaryota	Rhizaria	Cercozoa	Filosa-Thecofilosea	Filosa-Thecofilosea_X	Mataza-lineage	Mataza-lineage_X	Mataza-lineage_X_sp.	Flagellated cells
1962	0	0	0	0	0	0	0	19	0	0	0	0	0	0	0	Eukaryota	Alveolata	Dinoflagellata	Dinophyceae	Dinophyceae_X	Dinophyceae_XX	Dinophyceae_XXX	Dinophyceae_XXX_sp.	Dinoflagellata (Alveolata)
1964	0	0	0	0	0	38	0	0	0	0	0	0	0	0	0	Eukaryota	Alveolata	Dinoflagellata	Syndiniales	Dino-Group-II	Dino-Group-II-Clade-5	Dino-Group-II-Clade-5_X	Dino-Group-II-Clade-5_X_sp.	Dinoflagellata (Alveolata)
1965	0	0	0	0	0	0	0	0	0	0	0	12	14	0	0	Eukaryota	Alveolata	Dinoflagellata	Dinophyceae	Dinophysiales	Amphisoleniaceae	Amphisoleniaceae_X	Amphisoleniaceae_X_sp.	Dinoflagellata (Alveolata)
1966	0	0	0	16	6	30	0	0	0	0	0	0	0	0	0	Eukaryota	Archaeplastida	Chlorophyta	Pyramimonadales	Pyramimonadales_X	Pyramimonadales_XX	Pyramimonas	Pyramimonas_gelidicola	Flagellated cells
1967	0	0	0	0	0	0	0	12	0	0	0	0	0	0	0	Eukaryota	Alveolata	Dinoflagellata	Dinophyceae	Gymnodiniales	Gymnodiniaceae	Amphidinium	Amphidinium_longum	Dinoflagellata (Alveolata)
1968	0	0	0	0	0	0	14	0	0	0	1	0	0	0	0	Eukaryota	Rhizaria	Radiolaria	Acantharea	Acantharea_X	Acantharea_XX	Acantharea_XXX	Acantharea_XXX_sp.	Flagellated cells
1969	0	0	0	0	0	0	0	0	0	0	0	0	0	2	10	Eukaryota	Rhizaria	Cercozoa	Chlorarachniophyceae	Chlorarachnida	Chlorarachnida_X	Norrisiella	Norisiella_sphaerica	Flagellated cells
1971	0	0	0	5	0	73	0	0	0	0	0	0	0	0	0	Eukaryota	Stramenopiles	Opalozoa	MAST-3	MAST-3F	MAST-3F_X	MAST-3F_XX	MAST-3F_XX_sp.	Bacillariophyta (Stramenopiles)
1972	0	0	0	0	0	0	0	12	0	0	0	0	0	0	0	Eukaryota	Alveolata	Dinoflagellata	Dinophyceae	Dinophyceae_X	Dinophyceae_XX	Dinophyceae_XXX	Dinophyceae_XXX_sp.	Dinoflagellata (Alveolata)
1973	0	0	0	0	0	0	40	0	0	0	0	0	0	0	0	Eukaryota	Alveolata	Dinoflagellata	Syndiniales	Dino-Group-I	Dino-Group-I-Clade-5	Dino-Group-I-Clade-5_X	Dino-Group-I-Clade-5_X_sp.	Dinoflagellata (Alveolata)
1974	0	0	0	0	0	0	0	28	105	11	63	18	0	6	0	Eukaryota	Stramenopiles	Ochrophyta	Bacillariophyta	Bacillariophyta_X	Polar-centric-Mediophyceae	Odontella	Odontella_aurita	Bacillariophyta (Stramenopiles)
1975	0	0	0	0	0	0	0	0	0	87	24	0	0	0	0	Eukaryota	Rhizaria	Cercozoa	Filosa-Thecofilosea	Filosa-Thecofilosea_X	Mataza-lineage	Mataza-lineage_X	Mataza-lineage_X_sp.	Flagellated cells
1976	0	0	0	0	0	8	0	0	0	0	0	0	0	0	0	Eukaryota	Rhizaria	Radiolaria	Acantharea	Acantharea_X	Acantharea_XX	Acantharea_XXX	Acantharea_XXX_sp.	Flagellated cells
1977	0	0	0	0	0	18	0	0	0	0	0	0	0	0	0	Eukaryota	Archaeplastida	Chlorophyta	Trebouxiophyceae	Chlorellales	Chlorellales_X	Marvania	Marvania_coccoides	Flagellated cells
1978	0	3	0	0	0	15	0	0	0	0	0	0	0	0	0	Eukaryota	Rhizaria	Cercozoa	Filosa-Imbricatea	Filosa-Imbricatea_X	Novel-clade-2	Novel-clade-2_X	Novel-clade-2_X_sp.	Flagellated cells
1979	0	0	0	0	0	0	0	0	12	0	0	0	0	0	0	Eukaryota	Alveolata	Apicomplexa	Gregarinomorphea	Eugregarinorida	Lecudinidae	Lithocystis	Lithocystis_sp.	Flagellated cells
1980	0	0	0	0	0	0	0	0	27	0	44	0	0	0	0	Eukaryota	Alveolata	Apicomplexa	Gregarinomorphea	Eugregarinorida	Lecudinidae	Lecudina	Lecudina_phyllochaetopteri	Flagellated cells
1982	3	0	0	0	0	0	0	0	0	0	0	0	0	0	0	Eukaryota	Rhizaria	Cercozoa	Filosa-Thecofilosea	Cryomonadida	Protaspa-lineage	Protaspa-lineage_X	Protaspa-lineage_X_sp.	Flagellated cells
1983	0	0	0	0	0	0	0	0	0	0	12	7	4	0	0	Eukaryota	Rhizaria	Cercozoa	Filosa-Thecofilosea	Filosa-Thecofilosea_X	Filosa-Thecofilosea_XX	Filosa-Thecofilosea_XXX	Filosa-Thecofilosea_XXX_sp.	Flagellated cells
1984	0	7	0	0	0	0	0	0	0	0	0	0	0	0	0	Eukaryota	Rhizaria	Cercozoa	Cercozoa_X	Cercozoa_XX	Cercozoa_XXX	Cercozoa_XXXX	Cercozoa_XXXX_sp.	Flagellated cells
1985	0	0	8	0	0	0	0	0	0	0	0	0	0	0	0	Eukaryota	Opisthokonta	Choanoflagellida	Choanoflagellatea	Acanthoecida	Stephanoecidae_Group_H	Stephanoecidae_Group_H_X	Stephanoecidae_Group_H_X_sp.	Flagellated cells
1986	0	0	0	0	0	0	44	0	0	0	0	0	0	0	0	Eukaryota	Alveolata	Dinoflagellata	Syndiniales	Dino-Group-II	Dino-Group-II-Clade-1	Dino-Group-II-Clade-1_X	Dino-Group-II-Clade-1_X_sp.	Dinoflagellata (Alveolata)
1987	0	0	0	0	0	0	38	5	4	7	0	0	0	0	0	Eukaryota	Alveolata	Ciliophora	Spirotrichea	Hypotrichia	Hypotrichia_X	Hypotrichia_XX	Hypotrichia_XX_sp.	Ciliophora (Alveolata)
1989	0	0	0	0	0	0	3	0	0	0	0	0	0	0	0	Eukaryota	Stramenopiles	Opalozoa	MAST-3	MAST-3F	MAST-3F_X	MAST-3F_XX	MAST-3F_XX_sp.	Bacillariophyta (Stramenopiles)
1990	0	0	0	0	0	0	0	0	0	0	0	13	0	0	0	Eukaryota	Opisthokonta	Choanoflagellida	Choanoflagellatea	Acanthoecida	Stephanoecidae_Group_H	Stephanoecidae_Group_H_X	Stephanoecidae_Group_H_X_sp.	Flagellated cells
1991	0	7	0	0	0	0	0	0	0	0	0	0	0	0	0	Eukaryota	Stramenopiles	Opalozoa	MAST-12	MAST-12A	MAST-12A_X	MAST-12A_XX	MAST-12A_XX_sp.	Bacillariophyta (Stramenopiles)
1992	0	0	0	7	0	0	0	0	0	0	0	0	0	0	0	Eukaryota	Stramenopiles	Ochrophyta	Bacillariophyta	Bacillariophyta_X	Raphid-pennate	Navicula	Navicula_lanceolata	Bacillariophyta (Stramenopiles)
1993	0	40	0	8	8	0	0	0	0	0	0	0	0	0	0	Eukaryota	Rhizaria	Cercozoa	Filosa-Thecofilosea	Cryomonadida	Protaspa-lineage	Protaspa-lineage_X	Protaspa-lineage_X_sp.	Flagellated cells
1994	0	0	0	0	0	0	0	0	0	0	0	0	30	2	0	Eukaryota	Rhizaria	Cercozoa	Filosa-Thecofilosea	Ventricleftida	Ventrifissuridae	Ventrifissuridae_X	Ventrifissuridae_X_sp.	Flagellated cells
1995	0	0	0	0	0	0	0	0	6	0	0	0	0	0	0	Eukaryota	Rhizaria	Cercozoa	Filosa-Thecofilosea	Ventricleftida	Ventrifissuridae	Ventrifissuridae_X	Ventrifissuridae_X_sp.	Flagellated cells
1996	0	0	0	0	7	142	0	0	0	0	0	0	0	0	0	Eukaryota	Hacrobia	Cryptophyta	Cryptophyceae	Cryptomonadales	Cryptomonadales_X	Geminigera	Geminigera_cryophila	Flagellated cells
1997	0	0	0	0	0	0	0	0	0	0	0	112	31	258	55	Eukaryota	Rhizaria	Cercozoa	Filosa-Thecofilosea	Cryomonadida	Protaspa-lineage	Protaspa-lineage_X	Protaspa-lineage_X_sp.	Flagellated cells
1998	0	0	0	0	0	0	2	0	12	0	0	0	0	0	0	Eukaryota	Alveolata	Apicomplexa	Gregarinomorphea	Eugregarinorida	Polyplicariidae	Polyplicarium	Polyplicarium_curvarae	Flagellated cells
2000	0	0	0	0	0	0	0	0	0	0	0	0	7	0	0	Eukaryota	Stramenopiles	Opalozoa	MAST-3	MAST-3L	MAST-3L_X	MAST-3L_XX	MAST-3L_XX_sp.	Bacillariophyta (Stramenopiles)
2002	0	0	0	0	0	5	0	0	0	0	0	0	0	0	0	Eukaryota	Opisthokonta	Choanoflagellida	Choanoflagellatea	Craspedida	Monosigidae_Group_B	Monosigidae_Group_B_X	Monosigidae_Group_B_X_sp.	Flagellated cells
2003	0	0	0	6	0	0	0	0	0	0	0	0	0	0	0	Eukaryota	Rhizaria	Cercozoa	Cercozoa_X	Cercozoa_XX	Cercozoa_XXX	Cercozoa_XXXX	Cercozoa_XXXX_sp.	Flagellated cells
2004	0	0	0	0	0	0	47	72	0	0	0	0	0	0	0	Eukaryota	Alveolata	Dinoflagellata	Dinophyceae	Gymnodiniales	Gymnodiniaceae	Gymnodinium	Gymnodinium_sp.	Dinoflagellata (Alveolata)
2005	0	0	0	0	0	0	0	0	0	0	0	0	5	0	0	Eukaryota	Rhizaria	Cercozoa	Filosa-Imbricatea	Marimonadida	Marimonadida_X	Pseudopirsonia	Pseudopirsonia_mucosa	Flagellated cells
2006	0	0	0	0	17	20	0	0	0	0	0	0	0	0	0	Eukaryota	Rhizaria	Cercozoa	Filosa-Imbricatea	Filosa-Imbricatea_X	Novel-clade-2	Novel-clade-2_X	Novel-clade-2_X_sp.	Flagellated cells
2008	0	0	0	0	0	0	0	0	5	0	0	0	8	0	0	Eukaryota	Rhizaria	Cercozoa	Filosa-Imbricatea	Marimonadida	Marimonadida_X	Marimonadida_XX	Marimonadida_XX_sp.	Flagellated cells
2009	0	9	0	0	0	3	0	0	0	0	0	0	0	0	0	Eukaryota	Rhizaria	Cercozoa	Cercozoa_X	Cercozoa_XX	Cercozoa_XXX	Cercozoa_XXXX	Cercozoa_XXXX_sp.	Flagellated cells
2010	0	0	0	0	0	0	0	0	0	0	0	1	712	64	0	Eukaryota	Alveolata	Ciliophora	Oligohymenophorea	Peritrichia_2	Sessilida	Pseudovorticella	Pseudovorticella_sinensis	Ciliophora (Alveolata)
2012	0	0	0	0	0	0	3	2	0	0	2	0	0	0	0	Eukaryota	Archaeplastida	Chlorophyta	Trebouxiophyceae	Chlorellales	Chlorellales_X	Marvania	Marvania_coccoides	Flagellated cells
2013	0	0	0	0	0	8	0	0	0	0	0	0	0	0	0	Eukaryota	Alveolata	Dinoflagellata	Syndiniales	Dino-Group-II	Dino-Group-II-Clade-4	Dino-Group-II-Clade-4_X	Dino-Group-II-Clade-4_X_sp.	Dinoflagellata (Alveolata)
2014	0	0	0	0	0	0	40	33	57	0	0	0	0	0	0	Eukaryota	Hacrobia	Cryptophyta	Cryptophyceae	Cryptomonadales	Cryptomonadales_X	Teleaulax	Teleaulax_gracilis	Flagellated cells
2016	0	0	0	0	0	0	10	0	0	0	0	0	0	0	0	Eukaryota	Rhizaria	Cercozoa	Filosa-Thecofilosea	Ebriida	Ebriidae	Ebria	Ebria_tripartita	Flagellated cells
2017	0	0	0	0	0	0	0	0	26	0	0	0	0	0	0	Eukaryota	Archaeplastida	Chlorophyta	Chlorophyceae	Sphaeropleales	Sphaeropleales_X	Scenedesmus	Scenedesmus_armatus	Flagellated cells
2018	0	0	0	33	35	12	0	0	0	0	0	0	0	0	0	Eukaryota	Alveolata	Dinoflagellata	Dinophyceae	Peridiniales	Thoracosphaeraceae	Thoracosphaeraceae_X	Thoracosphaeraceae_X_sp.	Dinoflagellata (Alveolata)
2019	0	0	0	0	0	0	53	0	0	0	0	0	0	0	0	Eukaryota	Alveolata	Dinoflagellata	Syndiniales	Dino-Group-II	Dino-Group-II_X	Dino-Group-II_XX	Dino-Group-II_XX_sp.	Dinoflagellata (Alveolata)
2020	0	49	0	0	0	0	0	0	0	0	0	0	0	0	0	Eukaryota	Alveolata	Dinoflagellata	Dinophyceae	Peridiniales	Thoracosphaeraceae	Thoracosphaeraceae_X	Thoracosphaeraceae_X_sp.	Dinoflagellata (Alveolata)
2021	2	44	0	0	0	60	0	0	0	0	0	0	0	0	0	Eukaryota	Alveolata	Ciliophora	Spirotrichea	Strombidiida	Tontoniidae_A	Laboea	Laboea_strobila	Ciliophora (Alveolata)
2024	5	4	7	0	0	0	0	0	0	0	0	0	0	0	0	Eukaryota	Alveolata	Dinoflagellata	Dinophyceae	Peridiniales	Thoracosphaeraceae	Thoracosphaeraceae_X	Thoracosphaeraceae_X_sp.	Dinoflagellata (Alveolata)
2025	0	35	12	13	0	0	0	0	0	0	0	0	0	0	0	Eukaryota	Hacrobia	Cryptophyta	Cryptophyceae	Cryptomonadales	Cryptomonadales_X	Teleaulax	Teleaulax_gracilis	Flagellated cells
2026	0	0	0	0	0	0	17	2	0	0	0	0	0	0	0	Eukaryota	Archaeplastida	Chlorophyta	Chloropicophyceae	Chloropicales	Chloropicaceae	Chloroparvula	Chloroparvula_pacifica	Flagellated cells
2027	0	0	0	0	0	0	0	0	0	41	0	19	0	0	30	Eukaryota	Alveolata	Dinoflagellata	Dinophyceae	Dinophyceae_X	Dinophyceae_XX	Dinophyceae_XXX	Dinophyceae_XXX_sp.	Dinoflagellata (Alveolata)
2028	0	0	0	0	0	0	0	98	34	0	35	0	0	0	0	Eukaryota	Rhizaria	Cercozoa	Filosa-Imbricatea	Thaumatomonadida	Thaumatomonadidae	Reckertia	Reckertia_filosa	Flagellated cells
2031	0	0	0	10	0	7	0	0	0	0	0	0	0	0	0	Eukaryota	Hacrobia	Haptophyta	Prymnesiophyceae	Phaeocystales	Phaeocystaceae	Phaeocystis	Phaeocystis_cordata	Flagellated cells
2032	0	0	0	0	0	0	0	0	22	0	0	0	0	0	0	Eukaryota	Alveolata	Ciliophora	Spirotrichea	Choreotrichida	Lynnellidae	Lynnella	Lynnella_semiglobulosa	Ciliophora (Alveolata)
2034	0	0	0	0	0	0	4	0	0	0	2	0	0	0	0	Eukaryota	Opisthokonta	Choanoflagellida	Choanoflagellatea	Acanthoecida	Stephanoecidae_Group_H	Stephanoecidae_Group_H_X	Stephanoecidae_Group_H_X_sp.	Flagellated cells
2036	0	0	0	0	0	0	0	34	0	0	4	0	0	0	0	Eukaryota	Apusozoa	Apusomonadidae	Apusomonadidae_Group-1	Apusomonadidae_Group-1_X	Apusomonadidae_Group-1_XX	Apusomonadidae_Group-1_XXX	Apusomonadidae_Group-1_XXX_sp.	Flagellated cells
2037	0	0	0	0	0	0	0	2	0	0	0	0	6	0	0	Eukaryota	Apusozoa	Hilomonadea	Planomonadida	Planomonadidae	Planomonadidae_Group-1	Planomonas	Planomonas_bulbosa	Flagellated cells
2038	0	0	4	0	5	0	0	0	0	0	0	0	0	0	0	Eukaryota	Stramenopiles	Opalozoa	MAST-12	MAST-12E	MAST-12E_X	MAST-12E_XX	MAST-12E_XX_sp.	Bacillariophyta (Stramenopiles)
2039	0	0	0	0	0	0	53	0	0	0	0	0	0	0	0	Eukaryota	Stramenopiles	Ochrophyta	Bacillariophyta	Bacillariophyta_X	Polar-centric-Mediophyceae	Chaetoceros	Chaetoceros_brevis_3	Bacillariophyta (Stramenopiles)
2040	0	0	0	0	0	47	0	0	0	0	0	0	0	0	0	Eukaryota	Stramenopiles	Ochrophyta	Bacillariophyta	Bacillariophyta_X	Polar-centric-Mediophyceae	Chaetoceros	Chaetoceros_diadema_1	Bacillariophyta (Stramenopiles)
2041	0	0	0	0	0	0	0	0	0	0	0	0	11	11	0	Eukaryota	Rhizaria	Cercozoa	Filosa-Thecofilosea	Ventricleftida	CCW10-lineage	CCW10-lineage_X	CCW10-lineage_X_sp.	Flagellated cells
2042	0	0	0	0	0	0	0	0	0	0	0	5	0	0	0	Eukaryota	Stramenopiles	Opalozoa	MAST-12	MAST-12A	MAST-12A_X	MAST-12A_XX	MAST-12A_XX_sp.	Bacillariophyta (Stramenopiles)
2043	0	12	0	0	0	0	0	0	0	0	0	0	0	0	0	Eukaryota	Apusozoa	Hilomonadea	Planomonadida	Planomonadidae	Planomonadidae_Group-1	Stygamoeba	Stygamoeba_regulata	Flagellated cells
2044	0	0	0	0	0	0	0	13	31	0	12	0	0	0	0	Eukaryota	Alveolata	Apicomplexa	Gregarinomorphea	Eugregarinorida	Lecudinidae	Lecudina	Lecudina_phyllochaetopteri	Flagellated cells
2045	0	0	0	0	0	0	32	0	0	0	0	0	0	0	0	Eukaryota	Rhizaria	Cercozoa	Filosa-Imbricatea	Filosa-Imbricatea_X	Novel-clade-2	Novel-clade-2_X	Novel-clade-2_X_sp.	Flagellated cells
2046	0	0	0	0	36	99	0	0	0	0	0	0	0	0	0	Eukaryota	Alveolata	Dinoflagellata	Dinophyceae	Gymnodiniales	Gymnodiniaceae	Gyrodinium	Gyrodinium_spirale	Dinoflagellata (Alveolata)
2048	0	3	0	0	0	2	0	0	0	0	0	0	0	0	0	Eukaryota	Rhizaria	Cercozoa	Chlorarachniophyceae	Chlorarachnida	Minorisa-lineage	Minorisa	Minorisa_minuta	Flagellated cells
2050	0	0	0	42	0	8	0	0	0	0	0	0	0	0	0	Eukaryota	Stramenopiles	Ochrophyta	Bacillariophyta	Bacillariophyta_X	Polar-centric-Mediophyceae	Thalassiosira	Thalassiosira_profunda	Bacillariophyta (Stramenopiles)
2053	0	0	0	0	0	0	0	0	0	0	0	0	9	0	0	Eukaryota	Rhizaria	Cercozoa	Filosa-Thecofilosea	Filosa-Thecofilosea_X	Mataza-lineage	Mataza-lineage_X	Mataza-lineage_X_sp.	Flagellated cells
2054	0	0	0	0	0	24	0	0	0	0	0	0	0	0	0	Eukaryota	Rhizaria	Cercozoa	Filosa-Thecofilosea	Cryomonadida	Protaspa-lineage	Protaspa-lineage_X	Protaspa-lineage_X_sp.	Flagellated cells
2055	39	0	0	0	0	0	0	0	0	0	0	0	0	0	0	Eukaryota	Alveolata	Dinoflagellata	Dinophyceae	Gymnodiniales	Gymnodiniaceae	Gyrodinium	Gyrodinium_spirale	Dinoflagellata (Alveolata)
2056	0	0	4	92	120	17	0	0	0	0	0	0	0	0	0	Eukaryota	Alveolata	Dinoflagellata	Dinophyceae	Suessiales	Suessiaceae	Pelagodinium	Pelagodinium_beii	Dinoflagellata (Alveolata)
2057	0	0	0	0	0	6	0	0	0	0	0	0	0	0	0	Eukaryota	Opisthokonta	Choanoflagellida	Choanoflagellatea	Acanthoecida	Stephanoecidae_Group_H	Stephanoecidae_Group_H_X	Stephanoecidae_Group_H_X_sp.	Flagellated cells
2058	0	0	0	0	0	0	0	0	0	0	0	33	3	0	0	Eukaryota	Alveolata	Dinoflagellata	Dinophyceae	Peridiniales	Thoracosphaeraceae	Pentapharsodinium	Pentapharsodinium_tyrrhenicum	Dinoflagellata (Alveolata)
2059	0	0	0	0	0	0	486	173	121	2993	5204	614	5093	1352	55	Eukaryota	Hacrobia	Haptophyta	Prymnesiophyceae	Phaeocystales	Phaeocystaceae	Phaeocystis	Phaeocystis_globosa	Flagellated cells
2060	0	0	0	14	22	119	0	0	0	0	0	0	0	0	0	Eukaryota	Stramenopiles	Ochrophyta	Bacillariophyta	Bacillariophyta_X	Polar-centric-Mediophyceae	Odontella	Odontella_sinensis	Bacillariophyta (Stramenopiles)
2062	0	0	0	0	0	0	255	382	499	53	206	0	6	109	0	Eukaryota	Hacrobia	Cryptophyta	Cryptophyceae	Cryptomonadales	Cryptomonadales_X	Plagioselmis	Plagioselmis_prolonga	Flagellated cells
2063	0	0	0	0	0	0	0	0	0	0	0	0	4	0	0	Eukaryota	Rhizaria	Cercozoa	Filosa-Thecofilosea	Filosa-Thecofilosea_X	Filosa-Thecofilosea_XX	Filosa-Thecofilosea_XXX	Filosa-Thecofilosea_XXX_sp.	Flagellated cells
2064	0	0	0	0	0	7	0	0	0	0	0	0	0	0	0	Eukaryota	Alveolata	Apicomplexa	Gregarinomorphea	Eugregarinorida	Lecudinidae	Lecudina	Lecudina_phyllochaetopteri	Flagellated cells
2065	0	0	0	0	0	0	0	0	0	0	6	0	0	0	0	Eukaryota	Alveolata	Dinoflagellata	Dinophyceae	Peridiniales	Amphidomataceae	Azadinium	Azadinium_poporum	Dinoflagellata (Alveolata)
2066	0	0	0	0	0	0	0	0	5	0	0	0	0	0	0	Eukaryota	Stramenopiles	Ochrophyta	Bacillariophyta	Bacillariophyta_X	Polar-centric-Mediophyceae	Thalassiosira	Thalassiosira_anguste-lineata	Bacillariophyta (Stramenopiles)
2067	0	0	0	0	0	0	0	0	0	0	0	0	12	0	0	Eukaryota	Rhizaria	Cercozoa	Filosa-Thecofilosea	Ebriida	Botuliformidae	Botuliforma	Botuliforma_benthica	Flagellated cells
2068	0	1	0	0	4	8	0	0	0	0	0	0	0	0	0	Eukaryota	Alveolata	Dinoflagellata	Syndiniales	Dino-Group-II	Dino-Group-II_X	Dino-Group-II_XX	Dino-Group-II_XX_sp.	Dinoflagellata (Alveolata)
2069	0	29	0	0	0	0	0	0	0	0	0	0	0	0	0	Eukaryota	Alveolata	Dinoflagellata	Dinophyceae	Dinophyceae_X	Dinophyceae_XX	Dinophyceae_XXX	Dinophyceae_XXX_sp.	Dinoflagellata (Alveolata)
2071	82	0	0	0	0	0	0	0	0	0	0	0	0	0	0	Eukaryota	Alveolata	Dinoflagellata	Dinophyceae	Gymnodiniales	Gymnodiniaceae	Gyrodinium	Gyrodinium_spirale	Dinoflagellata (Alveolata)
2075	0	0	0	0	0	0	0	6	0	0	0	0	0	0	0	Eukaryota	Alveolata	Dinoflagellata	Dinophyceae	Peridiniales	Amphidomataceae	Azadinium	Azadinium_poporum	Dinoflagellata (Alveolata)
2078	0	0	0	0	0	0	0	11	0	0	0	0	0	0	0	Eukaryota	Rhizaria	Cercozoa	Cercozoa_X	Cercozoa_XX	Cercozoa_XXX	Cercozoa_XXXX	Cercozoa_XXXX_sp.	Flagellated cells
2079	0	0	0	0	0	0	354	167	61	0	16	10	27	0	1	Eukaryota	Alveolata	Dinoflagellata	Syndiniales	Dino-Group-II	Dino-Group-II-Clade-13	Dino-Group-II-Clade-13_X	Dino-Group-II-Clade-13_X_sp.	Dinoflagellata (Alveolata)
2080	65	0	0	0	0	0	0	0	0	0	0	0	0	0	0	Eukaryota	Alveolata	Dinoflagellata	Dinophyceae	Gymnodiniales	Gymnodiniaceae	Gyrodinium	Gyrodinium_spirale	Dinoflagellata (Alveolata)
2081	0	0	0	0	0	0	0	0	0	0	0	0	0	25	0	Eukaryota	Alveolata	Ciliophora	Oligohymenophorea	Scuticociliatia_1	Philasterida	Homalogastra	Homalogastra_setosa	Ciliophora (Alveolata)
2083	0	0	0	0	9	0	0	0	0	0	0	0	0	0	0	Eukaryota	Alveolata	Dinoflagellata	Syndiniales	Dino-Group-II	Dino-Group-II-Clade-3	Dino-Group-II-Clade-3_X	Dino-Group-II-Clade-3_X_sp.	Dinoflagellata (Alveolata)
2084	0	0	0	0	0	0	10	0	0	0	0	0	0	0	0	Eukaryota	Alveolata	Dinoflagellata	Dinophyceae	Dinophyceae_X	Dinophyceae_XX	Dinophyceae_XXX	Dinophyceae_XXX_sp.	Dinoflagellata (Alveolata)
2085	0	0	0	0	0	0	0	0	0	22	0	0	0	0	0	Eukaryota	Rhizaria	Cercozoa	Filosa-Thecofilosea	Ventricleftida	CCW10-lineage	CCW10-lineage_X	CCW10-lineage_X_sp.	Flagellated cells
2086	0	0	0	0	0	0	0	0	12	0	0	0	0	0	0	Eukaryota	Stramenopiles	Ochrophyta	Bacillariophyta	Bacillariophyta_X	Araphid-pennate	Delphineis	Delphineis_sp.	Bacillariophyta (Stramenopiles)
2087	0	0	0	0	0	0	0	0	0	51	0	0	0	0	30	Eukaryota	Alveolata	Dinoflagellata	Dinophyceae	Gymnodiniales	Gymnodiniaceae	Gyrodinium	Gyrodinium_fusiforme	Dinoflagellata (Alveolata)
2088	0	0	0	5	0	11	0	0	0	0	0	0	0	0	0	Eukaryota	Archaeplastida	Rhodophyta	Stylonematophyceae	Porphyridiales-2	Stylonematales-Group-I	Purpureofilum	Purpureofilum_apyrenoidigerum	Flagellated cells
2089	0	0	0	0	0	0	4	5	16	12	19	0	1	1	0	Eukaryota	Stramenopiles	Ochrophyta	Bacillariophyta	Bacillariophyta_X	Araphid-pennate	Asterionellopsis	Asterionellopsis_glacialis	Bacillariophyta (Stramenopiles)
2091	0	0	0	0	0	0	4	43	0	0	0	0	0	0	0	Eukaryota	Rhizaria	Cercozoa	Filosa-Thecofilosea	Ventricleftida	CCW10-lineage	CCW10-lineage_X	CCW10-lineage_X_sp.	Flagellated cells
2093	0	0	0	28	0	0	0	0	0	0	0	0	0	0	0	Eukaryota	Alveolata	Dinoflagellata	Dinophyceae	Peridiniales	Thoracosphaeraceae	Thoracosphaeraceae_X	Thoracosphaeraceae_X_sp.	Dinoflagellata (Alveolata)
2095	0	0	0	0	0	14	0	0	0	0	0	0	0	0	0	Eukaryota	Rhizaria	Cercozoa	Cercozoa_X	Cercozoa_XX	Cercozoa_XXX	Cercozoa_XXXX	Cercozoa_XXXX_sp.	Flagellated cells
2096	0	0	0	0	0	0	10	0	0	0	0	0	0	0	0	Eukaryota	Stramenopiles	Opalozoa	MAST-12	MAST-12D	MAST-12D_X	MAST-12D_XX	MAST-12D_XX_sp.	Bacillariophyta (Stramenopiles)
2098	17	0	0	0	0	0	0	0	0	0	0	0	0	0	0	Eukaryota	Alveolata	Dinoflagellata	Dinophyceae	Gymnodiniales	Gymnodiniaceae	Gyrodinium	Gyrodinium_sp.	Dinoflagellata (Alveolata)
2099	0	0	0	0	0	0	0	0	2	0	0	3	10	1	0	Eukaryota	Alveolata	Dinoflagellata	Syndiniales	Dino-Group-II	Dino-Group-II-Clade-14	Dino-Group-II-Clade-14_X	Dino-Group-II-Clade-14_X_sp.	Dinoflagellata (Alveolata)
2100	0	0	0	0	0	0	0	0	20	5	0	7	4	0	0	Eukaryota	Stramenopiles	Ochrophyta	Bolidophyceae	Parmales	Parmales_env_3	Parmales_env_3A	Parmales_env_3A_sp.	Bacillariophyta (Stramenopiles)
2101	0	0	0	0	0	0	8	11	0	0	8	5	8	97	43	Eukaryota	Stramenopiles	Opalozoa	MAST-3	MAST-3A	MAST-3A_X	MAST-3A_XX	MAST-3A_XX_sp.	Bacillariophyta (Stramenopiles)
2102	0	0	0	0	0	0	0	0	49	0	2	0	0	0	0	Eukaryota	Stramenopiles	Ochrophyta	Bacillariophyta	Bacillariophyta_X	Polar-centric-Mediophyceae	Porosira	Porosira_pseudodelicatula	Bacillariophyta (Stramenopiles)
2104	0	0	0	0	0	0	0	0	0	0	0	0	0	0	26	Eukaryota	Hacrobia	Haptophyta	Prymnesiophyceae	Prymnesiales	Prymnesiales_X	Chrysocampanula	Chrysocampanula_spinifera	Flagellated cells
2105	0	0	0	0	0	0	180	91	0	75	0	0	0	28	61	Eukaryota	Alveolata	Dinoflagellata	Dinophyceae	Prorocentrales	Prorocentraceae	Prorocentrum	Prorocentrum_rhathymum	Dinoflagellata (Alveolata)
2106	0	0	0	0	0	0	53	0	60	38	0	0	0	0	0	Eukaryota	Alveolata	Dinoflagellata	Dinophyceae	Peridiniales	Heterocapsaceae	Heterocapsa	Heterocapsa_pygmaea	Dinoflagellata (Alveolata)
2107	0	0	0	24	0	0	0	0	0	0	0	0	0	0	0	Eukaryota	Alveolata	Perkinsea	Perkinsida	Perkinsida_X	Parvilucifera-group	Parvilucifera	Parvilucifera_infectans	Flagellated cells
2108	0	0	0	0	0	0	0	0	0	0	0	0	4	0	0	Eukaryota	Rhizaria	Cercozoa	Filosa-Thecofilosea	Ventricleftida	Ventricleftida_X	Ventricleftida_XX	Ventricleftida_XX_sp.	Flagellated cells
2109	0	0	0	10	0	0	0	0	0	0	0	0	0	0	0	Eukaryota	Rhizaria	Cercozoa	Filosa-Imbricatea	Euglyphida	Euglyphida_X	Euglyphida_XX	Euglyphida_XX_sp.	Flagellated cells
2111	0	0	0	0	0	0	47	17	39	0	10	5	0	0	0	Eukaryota	Archaeplastida	Chlorophyta	Trebouxiophyceae	Chlorellales	Chlorellales_X	Picochlorum	Picochlorum_sp.	Flagellated cells
2112	0	0	0	0	0	0	0	273	535	0	1339	0	20	152	40	Eukaryota	Alveolata	Ciliophora	Spirotrichea	Strombidiida_B	Strombidiida_B_X	Strombidiida_B_XX	Strombidiida_B_XX_sp.	Ciliophora (Alveolata)
2113	5	7	24	45	0	10	0	0	0	0	0	0	0	0	0	Eukaryota	Archaeplastida	Chlorophyta	Trebouxiophyceae	Chlorellales	Chlorellales_X	Picochlorum	Picochlorum_sp.	Flagellated cells
2114	0	1115	878	83	0	0	0	0	0	0	0	0	0	0	0	Eukaryota	Stramenopiles	Ochrophyta	Bacillariophyta	Bacillariophyta_X	Polar-centric-Mediophyceae	Thalassiosira	Thalassiosira_lundiana	Bacillariophyta (Stramenopiles)
2115	0	0	0	0	0	0	0	0	0	16	0	0	0	0	8	Eukaryota	Alveolata	Dinoflagellata	Dinophyceae	Gymnodiniales	Gymnodiniaceae	Gyrodinium	Gyrodinium_fusiforme	Dinoflagellata (Alveolata)
2116	0	0	0	0	0	16	0	0	0	0	0	0	0	0	0	Eukaryota	Hacrobia	Cryptophyta	Cryptophyceae	Cryptomonadales	Cryptomonadales_X	Rhodomonas	Rhodomonas_salina	Flagellated cells
2117	0	0	0	0	0	0	11	0	0	0	0	0	0	0	0	Eukaryota	Rhizaria	Cercozoa	Filosa-Thecofilosea	Cryomonadida	Protaspa-lineage	Protaspa	Protaspa_grandis	Flagellated cells
2118	0	0	267	94	0	0	0	0	0	0	0	0	0	0	0	Eukaryota	Stramenopiles	Ochrophyta	Bacillariophyta	Bacillariophyta_X	Polar-centric-Mediophyceae	Minutocellus	Minutocellus_polymorphus	Bacillariophyta (Stramenopiles)
2119	0	0	0	0	0	0	27	0	0	0	0	0	0	0	0	Eukaryota	Alveolata	Dinoflagellata	Syndiniales	Dino-Group-II	Dino-Group-II-Clade-5	Dino-Group-II-Clade-5_X	Dino-Group-II-Clade-5_X_sp.	Dinoflagellata (Alveolata)
2120	0	0	28	0	0	0	0	0	0	0	0	0	0	0	0	Eukaryota	Opisthokonta	Mesomycetozoa	Ichthyosporea	Ichthyosphonida	Abeoformidae_Group_MAIP_1	Abeoformidae_Group_MAIP_1_X	Abeoformidae_Group_MAIP_1_X_sp.	Flagellated cells
2122	0	8	0	0	0	0	0	0	0	0	0	0	0	0	0	Eukaryota	Stramenopiles	Ochrophyta	Bacillariophyta	Bacillariophyta_X	Radial-centric-basal-Coscinodiscophyceae	Leptocylindrus	Leptocylindrus_minimus	Bacillariophyta (Stramenopiles)
2123	0	0	0	0	0	0	10	0	0	17	6	0	0	0	17	Eukaryota	Alveolata	Ciliophora	Spirotrichea	Strombidiida_F	Strombidiida_F_X	Strombidiida_F_XX	Strombidiida_F_XX_sp.	Ciliophora (Alveolata)
2124	0	0	0	6	0	16	0	0	0	0	0	0	0	0	0	Eukaryota	Alveolata	Dinoflagellata	Syndiniales	Dino-Group-II	Dino-Group-II-Clade-33	Dino-Group-II-Clade-33_X	Dino-Group-II-Clade-33_X_sp.	Dinoflagellata (Alveolata)
2125	0	0	6	9	9	84	0	0	0	0	0	0	0	0	0	Eukaryota	Hacrobia	Cryptophyta	Cryptophyceae	Cryptomonadales	Cryptomonadales_X	Teleaulax	Teleaulax_sp.	Flagellated cells
2126	0	0	0	0	0	0	0	7	3	0	0	0	0	0	0	Eukaryota	Rhizaria	Cercozoa	Filosa-Thecofilosea	Filosa-Thecofilosea_X	Filosa-Thecofilosea_XX	Filosa-Thecofilosea_XXX	Filosa-Thecofilosea_XXX_sp.	Flagellated cells
2127	0	0	0	0	0	0	0	0	0	0	0	0	6	9	0	Eukaryota	Rhizaria	Cercozoa	Filosa-Thecofilosea	Ebriida	TAGIRI1-lineage	TAGIRI1-lineage_X	TAGIRI1-lineage_X_sp.	Flagellated cells
2129	504	0	0	5	4	0	0	0	0	0	0	0	0	0	0	Eukaryota	Rhizaria	Cercozoa	Filosa-Thecofilosea	Filosa-Thecofilosea_X	Mataza-lineage	Mataza-lineage_X	Mataza-lineage_X_sp.	Flagellated cells
2130	0	0	4	0	0	0	0	0	0	0	0	0	0	0	0	Eukaryota	Alveolata	Dinoflagellata	Dinophyceae	Peridiniales	Kryptoperidiniaceae	Unruhdinium	Unruhdinium_jiulongensis	Dinoflagellata (Alveolata)
2131	12	0	0	0	0	0	0	0	0	0	0	0	0	0	0	Eukaryota	Alveolata	Dinoflagellata	Dinophyceae	Dinophysiales	Dinophysiaceae	Dinophysis	Dinophysis_fortii	Dinoflagellata (Alveolata)
2132	0	9	0	0	0	0	0	0	0	0	0	0	0	0	0	Eukaryota	Rhizaria	Cercozoa	Filosa-Imbricatea	Thaumatomonadida	Thaumatomonadida_X	Thaumatomonadida_XX	Thaumatomonadida_XX_sp.	Flagellated cells
2133	26	0	0	0	0	0	0	0	0	0	0	0	0	0	0	Eukaryota	Alveolata	Dinoflagellata	Dinophyceae	Dinophyceae_X	Dinophyceae_XX	Dinophyceae_XXX	Dinophyceae_XXX_sp.	Dinoflagellata (Alveolata)
2134	0	0	0	14	0	0	0	0	0	0	0	0	0	0	0	Eukaryota	Hacrobia	Centroheliozoa	Centroheliozoa_X	Pterocystida	Pterocystida_X	Pterocystida_XX	Pterocystida_XX_sp.	Flagellated cells
2135	0	0	0	7	0	0	0	0	0	0	0	0	0	0	0	Eukaryota	Alveolata	Dinoflagellata	Syndiniales	Dino-Group-II	Dino-Group-II-Clade-33	Dino-Group-II-Clade-33_X	Dino-Group-II-Clade-33_X_sp.	Dinoflagellata (Alveolata)
2138	0	0	0	0	10	1	0	0	0	0	0	0	0	0	0	Eukaryota	Archaeplastida	Chlorophyta	Chloropicophyceae	Chloropicales	Chloropicaceae	Chloropicon	Chloropicon_roscoffensis	Flagellated cells
2139	0	53	5	0	7	25	0	0	0	0	0	0	0	0	0	Eukaryota	Stramenopiles	Ochrophyta	Bacillariophyta	Bacillariophyta_X	Radial-centric-basal-Coscinodiscophyceae	Radial-centric-basal-Coscinodiscophyceae_X	Radial-centric-basal-Coscinodiscophyceae_X_sp.	Bacillariophyta (Stramenopiles)
2140	0	0	0	67	25	0	0	0	0	0	0	0	0	0	0	Eukaryota	Alveolata	Dinoflagellata	Dinophyceae	Peridiniales	Heterocapsaceae	Heterocapsa	Heterocapsa_pygmaea	Dinoflagellata (Alveolata)
2141	0	0	0	0	0	0	8	16	12	0	24	3	5	4	0	Eukaryota	Rhizaria	Cercozoa	Filosa-Thecofilosea	Cryomonadida	Rhogostoma-lineage	Rhogostoma	Rhogostoma_minus	Flagellated cells
2142	0	0	0	0	0	0	3	0	8	0	0	0	0	0	0	Eukaryota	Archaeplastida	Rhodophyta	Stylonematophyceae	Porphyridiales-2	Stylonematales-Group-I	Purpureofilum	Purpureofilum_apyrenoidigerum	Flagellated cells
2143	0	0	0	0	0	0	141	0	0	0	0	0	0	0	0	Eukaryota	Stramenopiles	Ochrophyta	Bacillariophyta	Bacillariophyta_X	Polar-centric-Mediophyceae	Minutocellus	Minutocellus_polymorphus	Bacillariophyta (Stramenopiles)
2144	0	0	0	0	0	22	0	0	0	0	0	0	0	0	0	Eukaryota	Rhizaria	Cercozoa	Filosa-Imbricatea	Filosa-Imbricatea_X	Novel-clade-2	Novel-clade-2_X	Novel-clade-2_X_sp.	Flagellated cells
2146	0	0	0	0	0	0	69	7	33	48	12	3	5	0	0	Eukaryota	Stramenopiles	Ochrophyta	Bacillariophyta	Bacillariophyta_X	Polar-centric-Mediophyceae	Ditylum	Ditylum_brightwellii	Bacillariophyta (Stramenopiles)
2147	0	0	0	1	118	37	0	0	0	0	0	0	0	0	0	Eukaryota	Excavata	Metamonada	Preaxostyla	Oxymonadida	Polymastigidae	Monocercomonoides	Monocercomonoides_sp.	Flagellated cells
2148	0	0	0	0	0	9	0	0	0	0	0	0	0	0	0	Eukaryota	Stramenopiles	Opalozoa	MAST-12	MAST-12D	MAST-12D_X	MAST-12D_XX	MAST-12D_XX_sp.	Bacillariophyta (Stramenopiles)
2149	0	0	0	0	0	0	21	0	32	0	6	0	0	0	18	Eukaryota	Alveolata	Dinoflagellata	Dinophyceae	Suessiales	Suessiaceae	Pelagodinium	Pelagodinium_beii	Dinoflagellata (Alveolata)
2150	0	26	3	7	0	1	0	0	0	0	0	0	0	0	0	Eukaryota	Alveolata	Dinoflagellata	Dinophyceae	Dinophyceae_X	Dinophyceae_XX	Dinophyceae_XXX	Dinophyceae_XXX_sp.	Dinoflagellata (Alveolata)
2151	0	0	0	39	0	13	0	0	0	0	0	0	0	0	0	Eukaryota	Stramenopiles	Ochrophyta	Bacillariophyta	Bacillariophyta_X	Raphid-pennate	Raphid-pennate_X	Raphid-pennate_X_sp.	Bacillariophyta (Stramenopiles)
2152	0	0	0	0	0	0	0	22	0	7	0	59	4	10	0	Eukaryota	Alveolata	Dinoflagellata	Dinophyceae	Gonyaulacales	Goniodomataceae	Alexandrium	Alexandrium_minutum	Dinoflagellata (Alveolata)
2153	0	16	0	0	0	0	0	0	0	0	0	0	0	0	0	Eukaryota	Alveolata	Dinoflagellata	Syndiniales	Dino-Group-II	Dino-Group-II-Clade-1	Dino-Group-II-Clade-1_X	Dino-Group-II-Clade-1_X_sp.	Dinoflagellata (Alveolata)
2154	0	6	3	5	11	14	0	0	0	0	0	0	0	0	0	Eukaryota	Rhizaria	Cercozoa	Filosa-Thecofilosea	Ventricleftida	Ventrifissuridae	Ventrifissuridae_X	Ventrifissuridae_X_sp.	Flagellated cells
2155	0	0	13	50	7	4	0	0	0	0	0	0	0	0	0	Eukaryota	Alveolata	Dinoflagellata	Syndiniales	Dino-Group-III	Dino-Group-III_X	Dino-Group-III_XX	Dino-Group-III_XX_sp.	Dinoflagellata (Alveolata)
2156	0	0	0	0	0	0	9	0	0	0	0	0	0	0	0	Eukaryota	Archaeplastida	Rhodophyta	Stylonematophyceae	Porphyridiales-2	Stylonematales-Group-I	Purpureofilum	Purpureofilum_apyrenoidigerum	Flagellated cells
2157	0	0	0	0	0	0	0	0	0	0	0	0	19	0	0	Eukaryota	Rhizaria	Cercozoa	Filosa-Imbricatea	Marimonadida	Marimonadida_X	Marimonadida_XX	Marimonadida_XX_sp.	Flagellated cells
2158	0	15	12	0	0	0	0	0	0	0	0	0	0	0	0	Eukaryota	Rhizaria	Cercozoa	Filosa-Imbricatea	Marimonadida	Marimonadida_X	Marimonadida_XX	Marimonadida_XX_sp.	Flagellated cells
2159	0	0	0	0	0	0	0	295	0	0	0	0	0	0	0	Eukaryota	Rhizaria	Cercozoa	Filosa-Thecofilosea	Ebriida	TAGIRI1-lineage	TAGIRI1-lineage_X	TAGIRI1-lineage_X_sp.	Flagellated cells
2160	0	8	0	0	0	0	0	0	0	0	0	0	0	0	0	Eukaryota	Alveolata	Ciliophora	Spirotrichea	Strombidiida	Strombidiidae	Varistrombidium	Varistrombidium_kielum	Ciliophora (Alveolata)
2162	0	0	4	0	0	0	0	0	0	0	0	0	0	0	0	Eukaryota	Archaeplastida	Rhodophyta	Stylonematophyceae	Porphyridiales-2	Stylonematales-Group-I	Purpureofilum	Purpureofilum_apyrenoidigerum	Flagellated cells
2163	0	0	11	0	0	0	0	0	0	0	0	0	0	0	0	Eukaryota	Alveolata	Dinoflagellata	Dinophyceae	Peridiniales	Thoracosphaeraceae	Thoracosphaeraceae_X	Thoracosphaeraceae_X_sp.	Dinoflagellata (Alveolata)
2164	12	0	0	0	0	0	0	0	0	0	0	0	0	0	0	Eukaryota	Alveolata	Dinoflagellata	Dinophyceae	Gymnodiniales	Gymnodiniaceae	Gyrodinium	Gyrodinium_sp.	Dinoflagellata (Alveolata)
2165	0	0	0	0	0	0	0	0	0	0	51	21	0	36	0	Eukaryota	Alveolata	Dinoflagellata	Dinophyceae	Peridiniales	Amphidomataceae	Azadinium	Azadinium_trinitatum	Dinoflagellata (Alveolata)
2167	0	0	0	0	0	0	0	0	0	0	0	19	16	0	0	Eukaryota	Rhizaria	Cercozoa	Filosa-Thecofilosea	Cryomonadida	Protaspa-lineage	Protaspa-lineage_X	Protaspa-lineage_X_sp.	Flagellated cells
2168	0	3	0	92	12	401	0	0	0	0	0	0	0	0	0	Eukaryota	Stramenopiles	Opalozoa	MAST-3	MAST-3C	MAST-3C_X	MAST-3C_XX	MAST-3C_XX_sp.	Bacillariophyta (Stramenopiles)
2169	0	0	0	0	0	0	24	31	0	0	6	0	0	0	0	Eukaryota	Alveolata	Ciliophora	Spirotrichea	Strombidiida	Strombidiidae_H	Strombidiidae_H_X	Strombidiidae_H_X_sp.	Ciliophora (Alveolata)
2170	0	0	0	10	5	9	0	0	0	0	0	0	0	0	0	Eukaryota	Alveolata	Perkinsea	Perkinsida	Perkinsida_X	Perkinsida_XX	Perkinsus	Perkinsus_olseni	Flagellated cells
2172	0	0	0	0	10	0	0	0	0	0	0	0	0	0	0	Eukaryota	Rhizaria	Cercozoa	Filosa-Imbricatea	Marimonadida	Marimonadida_X	Auranticordis	Auranticordis_quadriverberis	Flagellated cells
2174	0	168	0	0	0	0	0	0	0	0	0	0	0	0	0	Eukaryota	Alveolata	Perkinsea	Perkinsida	Perkinsida_X	Parvilucifera-group	Parvilucifera	Parvilucifera_prorocentri	Flagellated cells
2175	0	0	0	0	0	0	0	0	0	12	0	0	0	0	0	Eukaryota	Stramenopiles	Ochrophyta	Bacillariophyta	Bacillariophyta_X	Raphid-pennate	Navicula	Navicula_sp.	Bacillariophyta (Stramenopiles)
2176	0	0	0	0	0	0	0	16	0	0	23	0	0	0	0	Eukaryota	Rhizaria	Cercozoa	Filosa-Imbricatea	Thaumatomonadida	Thaumatomonadidae	Thaumatomonas	Thaumatomonas_vancouveri	Flagellated cells
2177	0	0	0	0	0	0	0	0	31	16	0	0	0	0	0	Eukaryota	Rhizaria	Cercozoa	Filosa-Thecofilosea	Cryomonadida	Protaspa-lineage	Protaspa-lineage_X	Protaspa-lineage_X_sp.	Flagellated cells
2178	0	0	0	0	0	5	0	0	0	0	0	0	0	0	0	Eukaryota	Rhizaria	Cercozoa	Filosa-Thecofilosea	Ventricleftida	Verrucomonadidae	Verrucomonas	Verrucomonas_sp.	Flagellated cells
2179	0	0	0	0	0	0	0	0	0	0	0	0	0	37	0	Eukaryota	Rhizaria	Cercozoa	Filosa	Filosa_X	Filosa_XX	Discomonas	Discomonas_retusa	Flagellated cells
2180	0	0	0	0	0	0	0	0	0	0	0	0	3	5	0	Eukaryota	Rhizaria	Cercozoa	Filosa-Imbricatea	Thaumatomonadida	Thaumatomonadidae	Thaumatomonas	Thaumatomonas_vancouveri	Flagellated cells
2183	0	0	0	0	0	52	0	0	0	0	0	0	0	0	0	Eukaryota	Alveolata	Ciliophora	Spirotrichea	Tintinnida	TIN_04	Tintinnopsis_04	Tintinnopsis_parvula	Ciliophora (Alveolata)
2184	0	188	0	0	0	0	0	0	0	0	0	0	0	0	0	Eukaryota	Alveolata	Dinoflagellata	Dinophyceae	Prorocentrales	Prorocentraceae	Prorocentrum	Prorocentrum_cordatum	Dinoflagellata (Alveolata)
2185	0	0	0	0	0	0	0	0	0	0	0	0	0	0	8	Eukaryota	Stramenopiles	Opalozoa	MAST-12	MAST-12D	MAST-12D_X	MAST-12D_XX	MAST-12D_XX_sp.	Bacillariophyta (Stramenopiles)
2188	0	0	9	0	0	0	0	0	0	0	0	0	0	0	0	Eukaryota	Stramenopiles	Ochrophyta	Bacillariophyta	Bacillariophyta_X	Polar-centric-Mediophyceae	Chaetoceros	Chaetoceros_costatus	Bacillariophyta (Stramenopiles)
2191	0	0	0	0	0	58	0	0	0	0	0	0	0	0	0	Eukaryota	Alveolata	Dinoflagellata	Dinophyceae	Peridiniales	Amphidomataceae	Azadinium	Azadinium_trinitatum	Dinoflagellata (Alveolata)
2192	0	0	0	14	0	0	0	0	0	0	0	0	0	0	0	Eukaryota	Alveolata	Dinoflagellata	Dinophyceae	Gymnodiniales	Gymnodiniaceae	Polykrikos	Polykrikos_geminatus	Dinoflagellata (Alveolata)
2193	0	0	0	0	0	0	0	8	0	0	0	0	0	0	0	Eukaryota	Rhizaria	Cercozoa	Filosa-Thecofilosea	Filosa-Thecofilosea_X	Filosa-Thecofilosea_XX	Filosa-Thecofilosea_XXX	Filosa-Thecofilosea_XXX_sp.	Flagellated cells
2194	0	0	2	5	0	0	0	0	0	0	0	0	0	0	0	Eukaryota	Rhizaria	Cercozoa	Cercozoa_X	Cercozoa_XX	Cercozoa_XXX	Cercozoa_XXXX	Cercozoa_XXXX_sp.	Flagellated cells
2195	0	0	0	0	0	0	0	0	0	0	0	0	0	0	11	Eukaryota	Alveolata	Dinoflagellata	Dinophyceae	Gymnodiniales	Gymnodiniaceae	Gymnodinium	Gymnodinium_sp.	Dinoflagellata (Alveolata)
2196	0	3	0	0	4	1	0	0	0	0	0	0	0	0	0	Eukaryota	Stramenopiles	Ochrophyta	Bacillariophyta	Bacillariophyta_X	Polar-centric-Mediophyceae	Bacteriastrum	Bacteriastrum_hyalinum	Bacillariophyta (Stramenopiles)
2197	0	0	0	0	0	0	0	36	0	0	0	0	0	0	0	Eukaryota	Rhizaria	Cercozoa	Filosa-Thecofilosea	Cryomonadida	Cryothecomonas-lineage	Cryothecomonas-lineage_X	Cryothecomonas-lineage_X_sp.	Flagellated cells
2198	0	0	0	0	0	0	0	0	0	19	0	0	0	0	0	Eukaryota	Hacrobia	Haptophyta	Prymnesiophyceae	Prymnesiales	Chrysochromulinaceae	Chrysochromulina	Chrysochromulina_sp.	Flagellated cells
2199	0	0	0	0	0	0	0	0	0	0	6	0	0	0	0	Eukaryota	Rhizaria	Cercozoa	Filosa-Thecofilosea	Filosa-Thecofilosea_X	Filosa-Thecofilosea_XX	Filosa-Thecofilosea_XXX	Filosa-Thecofilosea_XXX_sp.	Flagellated cells
2200	0	0	0	0	0	0	0	0	0	0	0	0	4	0	0	Eukaryota	Alveolata	Ciliophora	Oligohymenophorea	Scuticociliatia_1	Philasterida	Mesanophrys	Mesanophrys_carcini	Ciliophora (Alveolata)
2201	0	0	0	0	0	0	7	0	0	0	0	0	0	0	0	Eukaryota	Hacrobia	Cryptophyta	Cryptophyceae	Cryptomonadales	Cryptomonadales_X	Teleaulax	Teleaulax_sp.	Flagellated cells
2204	0	0	0	0	0	0	0	0	43	548	148	55	13	3	0	Eukaryota	Rhizaria	Cercozoa	Filosa-Thecofilosea	Filosa-Thecofilosea_X	Mataza-lineage	Mataza-lineage_X	Mataza-lineage_X_sp.	Flagellated cells
2205	43	487	0	0	0	0	0	0	0	0	0	0	0	0	0	Eukaryota	Alveolata	Dinoflagellata	Noctilucophyceae	Noctilucales	Noctilucaceae	Noctiluca	Noctiluca_scintillans	Dinoflagellata (Alveolata)
2206	0	0	0	0	0	0	0	98	38	12	9	8	0	0	0	Eukaryota	Rhizaria	Cercozoa	Filosa-Imbricatea	Filosa-Imbricatea_X	Novel-clade-2	Novel-clade-2_X	Novel-clade-2_X_sp.	Flagellated cells
2207	772	0	0	7	0	0	0	0	0	0	0	0	0	0	0	Eukaryota	Stramenopiles	Opalozoa	MAST-12	MAST-12E	MAST-12E_X	MAST-12E_XX	MAST-12E_XX_sp.	Bacillariophyta (Stramenopiles)
2208	0	0	0	7	0	0	0	0	0	0	0	0	0	0	0	Eukaryota	Opisthokonta	Choanoflagellida	Choanoflagellatea	Craspedida	Monosigidae_Group_B	Monosigidae_Group_B_X	Monosigidae_Group_B_X_sp.	Flagellated cells
2209	0	0	0	0	0	0	0	0	0	0	0	0	0	0	6	Eukaryota	Alveolata	Dinoflagellata	Dinophyceae	Dinophyceae_X	Dinophyceae_XX	Dinophyceae_XXX	Dinophyceae_XXX_sp.	Dinoflagellata (Alveolata)
2210	0	0	0	0	0	0	0	46	0	0	0	0	0	0	0	Eukaryota	Hacrobia	Cryptophyta	Cryptophyceae	Goniomonadales	Goniomonadales_X	Goniomonadales_XX	Goniomonadales_XX_sp.	Flagellated cells
2211	0	0	0	0	0	0	0	0	0	19	0	48	0	0	0	Eukaryota	Rhizaria	Cercozoa	Filosa-Thecofilosea	Cryomonadida	Protaspa-lineage	Protaspa-lineage_X	Protaspa-lineage_X_sp.	Flagellated cells
2212	0	0	0	0	94	39	0	0	0	0	0	0	0	0	0	Eukaryota	Hacrobia	Haptophyta	Prymnesiophyceae	Isochrysidales	Noelaerhabdaceae	Gephyrocapsa	Gephyrocapsa_oceanica	Flagellated cells
2213	0	0	0	0	0	0	0	0	5	0	3	0	0	0	0	Eukaryota	Opisthokonta	Choanoflagellida	Choanoflagellatea	Craspedida	Monosigidae_Group_M	Monosigidae_Group_M_X	Monosigidae_Group_M_X_sp.	Flagellated cells
2214	14	0	36	0	0	0	0	0	0	0	0	0	0	0	0	Eukaryota	Stramenopiles	Ochrophyta	Bacillariophyta	Bacillariophyta_X	Polar-centric-Mediophyceae	Minidiscus	Minidiscus_trioculatus	Bacillariophyta (Stramenopiles)
2216	0	0	0	7	0	0	0	0	0	0	0	0	0	0	0	Eukaryota	Alveolata	Apicomplexa	Gregarinomorphea	Eugregarinorida	Lecudinidae	Lecudina	Lecudina_phyllochaetopteri	Flagellated cells
2217	0	11	0	0	0	0	0	0	0	0	0	0	0	0	0	Eukaryota	Alveolata	Ciliophora	Spirotrichea	Choreotrichida	Strombidinopsidae	Strombidinopsis	Strombidinopsis_acuminata	Ciliophora (Alveolata)
2218	0	0	0	42	8	0	0	0	0	0	0	0	0	0	0	Eukaryota	Alveolata	Dinoflagellata	Syndiniales	Dino-Group-II	Dino-Group-II-Clade-44	Dino-Group-II-Clade-44_X	Dino-Group-II-Clade-44_X_sp.	Dinoflagellata (Alveolata)
2219	0	0	0	0	0	0	0	0	0	0	0	0	78	0	0	Eukaryota	Rhizaria	Cercozoa	Filosa-Imbricatea	Filosa-Imbricatea_X	Novel-clade-2	Novel-clade-2_X	Novel-clade-2_X_sp.	Flagellated cells
2220	0	0	0	0	0	4	0	0	0	0	0	0	0	0	0	Eukaryota	Stramenopiles	Ochrophyta	Bacillariophyta	Bacillariophyta_X	Polar-centric-Mediophyceae	Thalassiosira	Thalassiosira_minima	Bacillariophyta (Stramenopiles)
2221	0	0	0	0	0	0	0	41	23	0	31	0	0	0	0	Eukaryota	Alveolata	Ciliophora	Spirotrichea	Choreotrichida	Strombidinopsidae	Strombidinopsis	Strombidinopsis_batos	Ciliophora (Alveolata)
2222	0	0	0	0	0	0	0	0	0	0	0	0	0	16	0	Eukaryota	Rhizaria	Cercozoa	Filosa-Thecofilosea	Ventricleftida	Ventricleftida_X	Ventricleftida_XX	Ventricleftida_XX_sp.	Flagellated cells
2223	0	0	0	0	0	0	8	0	0	0	0	0	0	0	0	Eukaryota	Stramenopiles	Ochrophyta	Bacillariophyta	Bacillariophyta_X	Polar-centric-Mediophyceae	Odontella	Odontella_mobiliensis	Bacillariophyta (Stramenopiles)
2224	0	0	0	70	19	0	0	0	0	0	0	0	0	0	0	Eukaryota	Rhizaria	Cercozoa	Filosa-Imbricatea	Filosa-Imbricatea_X	Novel-clade-2	Novel-clade-2_X	Novel-clade-2_X_sp.	Flagellated cells
2225	0	0	0	0	0	0	0	0	0	0	0	0	10	0	0	Eukaryota	Hacrobia	Haptophyta	Prymnesiophyceae	Prymnesiales	Prymnesiophyceae_Clade_B3	Prymnesiophyceae_Clade_B3_X	Prymnesiophyceae_Clade_B3_X_sp.	Flagellated cells
2226	0	0	0	17	0	0	0	0	0	0	0	0	0	0	0	Eukaryota	Hacrobia	Cryptophyta	Cryptophyceae	Cryptomonadales	Cryptomonadales_X	Geminigera	Geminigera_cryophila	Flagellated cells
2227	0	0	0	0	0	0	0	14	0	0	0	0	0	0	0	Eukaryota	Rhizaria	Cercozoa	Filosa-Thecofilosea	Ventricleftida	Ventricleftida_X	Ventricleftida_XX	Ventricleftida_XX_sp.	Flagellated cells
2228	0	0	0	0	0	9	0	0	0	0	0	0	0	0	0	Eukaryota	Alveolata	Dinoflagellata	Dinophyceae	Gymnodiniales	Gymnodiniaceae	Amphidinium	Amphidinium_longum	Dinoflagellata (Alveolata)
2229	0	0	0	0	0	0	497	801	239	137	947	53	20	170	83	Eukaryota	Alveolata	Dinoflagellata	Dinophyceae	Gymnodiniales	Kareniaceae	Karlodinium	Karlodinium_veneficum	Dinoflagellata (Alveolata)
2231	0	7	0	0	0	0	0	0	0	0	0	0	0	0	0	Eukaryota	Alveolata	Dinoflagellata	Syndiniales	Dino-Group-II	Dino-Group-II-Clade-1	Dino-Group-II-Clade-1_X	Dino-Group-II-Clade-1_X_sp.	Dinoflagellata (Alveolata)
2232	0	0	0	0	0	0	10	0	0	0	0	0	0	0	0	Eukaryota	Alveolata	Dinoflagellata	Dinophyceae	Dinophyceae_X	Dinophyceae_XX	Dinophyceae_XXX	Dinophyceae_XXX_sp.	Dinoflagellata (Alveolata)
2233	0	0	0	0	0	0	0	82	46	24	103	49	12	76	28	Eukaryota	Alveolata	Ciliophora	Spirotrichea	Strombidiida	Strombidiidae_B	Strombidiidae_B_X	Strombidiidae_B_X_sp.	Ciliophora (Alveolata)
2235	0	0	0	0	0	0	0	0	5	0	0	0	0	0	0	Eukaryota	Hacrobia	Cryptophyta	Cryptophyceae	Goniomonadales	Goniomonadales_X	Goniomonadales_XX	Goniomonadales_XX_sp.	Flagellated cells
2236	0	0	0	0	0	0	15	0	0	0	0	0	0	0	0	Eukaryota	Rhizaria	Radiolaria	Acantharea	Acantharea-Group-I	Acantharea-Group-I_X	Acantharea-Group-I_XX	Acantharea-Group-I_XX_sp.	Flagellated cells
2237	0	0	0	0	0	8	0	0	0	0	0	0	0	0	0	Eukaryota	Rhizaria	Cercozoa	Filosa-Thecofilosea	Filosa-Thecofilosea_X	Mataza-lineage	Mataza-lineage_X	Mataza-lineage_X_sp.	Flagellated cells
2238	0	0	5	11	0	14	0	0	0	0	0	0	0	0	0	Eukaryota	Hacrobia	Cryptophyta	Cryptophyceae	Cryptomonadales	Cryptomonadales_X	Hemiselmis	Hemiselmis_cryptochromatica	Flagellated cells
2240	0	0	0	0	0	0	4	0	0	0	0	0	0	0	0	Eukaryota	Stramenopiles	Ochrophyta	Bacillariophyta	Bacillariophyta_X	Radial-centric-basal-Coscinodiscophyceae	Coscinodiscus	Coscinodiscus_sp.	Bacillariophyta (Stramenopiles)
2241	0	0	0	0	0	0	0	14	0	0	0	0	0	0	0	Eukaryota	Hacrobia	Cryptophyta	Cryptophyceae	Cryptomonadales	Cryptomonadales_X	Hemiselmis	Hemiselmis_cryptochromatica	Flagellated cells
2242	10	0	0	0	0	0	0	0	0	0	0	0	0	0	0	Eukaryota	Alveolata	Dinoflagellata	Dinophyceae	Gymnodiniales	Gymnodiniaceae	Gyrodinium	Gyrodinium_sp.	Dinoflagellata (Alveolata)
2243	0	0	0	0	0	0	3	0	2	0	0	0	0	0	0	Eukaryota	Apusozoa	Apusomonadidae	Apusomonadidae_Group-1	Apusomonadidae_Group-1_X	Apusomonadidae_Group-1_XX	Apusomonadidae_Group-1_XXX	Apusomonadidae_Group-1_XXX_sp.	Flagellated cells
2244	0	0	0	61	22	42	0	0	0	0	0	0	0	0	0	Eukaryota	Stramenopiles	Ochrophyta	Bacillariophyta	Bacillariophyta_X	Raphid-pennate	Pseudo-nitzschia	Pseudo-nitzschia_sp.	Bacillariophyta (Stramenopiles)
2245	0	0	0	0	0	0	0	50	0	0	0	9	4	0	0	Eukaryota	Alveolata	Dinoflagellata	Dinophyceae	Peridiniales	Thoracosphaeraceae	Thoracosphaeraceae_X	Thoracosphaeraceae_X_sp.	Dinoflagellata (Alveolata)
2246	0	0	0	0	0	13	0	0	0	0	0	0	0	0	0	Eukaryota	Alveolata	Dinoflagellata	Dinophyceae	Dinophyceae_X	Dinophyceae_XX	Dinophyceae_XXX	Dinophyceae_XXX_sp.	Dinoflagellata (Alveolata)
2247	42	0	0	0	0	0	0	0	0	0	0	0	0	0	0	Eukaryota	Alveolata	Dinoflagellata	Dinophyceae	Gymnodiniales	Gymnodiniaceae	Gyrodinium	Gyrodinium_fusiforme	Dinoflagellata (Alveolata)
2248	0	0	0	0	0	0	0	20	35	0	6	0	0	0	0	Eukaryota	Archaeplastida	Rhodophyta	Stylonematophyceae	Porphyridiales-2	Stylonematales-Group-I	Rhodospora	Rhodospora_sordida	Flagellated cells
2249	0	0	2	0	2	0	0	0	0	0	0	0	0	0	0	Eukaryota	Rhizaria	Cercozoa	Filosa-Imbricatea	Filosa-Imbricatea_X	Novel-clade-2	Novel-clade-2_X	Novel-clade-2_X_sp.	Flagellated cells
2252	1	0	0	0	0	0	0	0	0	0	0	0	0	0	0	Eukaryota	Alveolata	Dinoflagellata	Dinophyceae	Gymnodiniales	Gymnodiniaceae	Gyrodinium	Gyrodinium_fusiforme	Dinoflagellata (Alveolata)
2253	0	0	0	22	43	0	0	0	0	0	0	0	0	0	0	Eukaryota	Rhizaria	Cercozoa	Filosa-Thecofilosea	Cryomonadida	Cryothecomonas-lineage	Cryothecomonas	Cryothecomonas_aestivalis	Flagellated cells
2254	0	0	0	6	0	0	0	0	0	0	0	0	0	0	0	Eukaryota	Alveolata	Apicomplexa	Gregarinomorphea	Eugregarinorida	Lecudinidae	Lecudina	Lecudina_phyllochaetopteri	Flagellated cells
2255	0	0	0	0	0	0	0	0	0	0	0	0	5	0	0	Eukaryota	Hacrobia	Haptophyta	Prymnesiophyceae	Prymnesiales	Prymnesiophyceae_Clade_B3	Prymnesiophyceae_Clade_B3_X	Prymnesiophyceae_Clade_B3_X_sp.	Flagellated cells
2256	0	0	0	0	0	0	0	32	0	0	0	0	0	0	0	Eukaryota	Alveolata	Apicomplexa	Gregarinomorphea	Gregarines	Gregarines_X	Selenidium1	Selenidium1_serpulae	Flagellated cells
2257	0	0	0	0	0	0	52	6	0	0	0	0	0	4	6	Eukaryota	Stramenopiles	Opalozoa	MAST-3	MAST-3E	MAST-3E_X	MAST-3E_XX	MAST-3E_XX_sp.	Bacillariophyta (Stramenopiles)
2258	0	0	0	0	0	0	0	0	14	0	0	0	0	0	0	Eukaryota	Alveolata	Ciliophora	Oligohymenophorea	Scuticociliatia_1	Philasterida	Parauronema	Parauronema_cf._virginianum	Ciliophora (Alveolata)
2259	0	0	0	0	0	3	0	0	0	0	0	0	0	0	0	Eukaryota	Alveolata	Apicomplexa	Gregarinomorphea	Eugregarinorida	Lecudinidae	Lecudina	Lecudina_phyllochaetopteri	Flagellated cells
2260	0	0	0	0	0	0	0	0	0	0	0	0	0	6	0	Eukaryota	Alveolata	Dinoflagellata	Syndiniales	Dino-Group-II	Dino-Group-II-Clade-8	Dino-Group-II-Clade-8_X	Dino-Group-II-Clade-8_X_sp.	Dinoflagellata (Alveolata)
2262	0	0	0	0	0	0	25	0	0	0	0	0	0	0	0	Eukaryota	Alveolata	Ciliophora	Spirotrichea	Strombidiida	Strombidiidae_G	Strombidiidae_G_X	Strombidiidae_G_X_sp.	Ciliophora (Alveolata)
2263	0	0	0	0	0	0	0	0	0	0	8	0	0	0	0	Eukaryota	Rhizaria	Cercozoa	Filosa-Thecofilosea	Cryomonadida	Protaspa-lineage	Protaspa-lineage_X	Protaspa-lineage_X_sp.	Flagellated cells
2264	0	0	0	0	0	0	6	3	3	6	0	0	6	0	0	Eukaryota	Apusozoa	Apusomonadidae	Apusomonadidae_Group-1	Apusomonadidae_Group-1_X	Apusomonadidae_Group-1_XX	Apusomonadidae_Group-1_XXX	Apusomonadidae_Group-1_XXX_sp.	Flagellated cells
2265	0	0	0	0	0	10	0	0	0	0	0	0	0	0	0	Eukaryota	Alveolata	Dinoflagellata	Dinophyceae	Dinophyceae_X	Dinophyceae_XX	Dinophyceae_XXX	Dinophyceae_XXX_sp.	Dinoflagellata (Alveolata)
2266	0	4	1	2	0	0	0	0	0	0	0	0	0	0	0	Eukaryota	Stramenopiles	Ochrophyta	Bacillariophyta	Bacillariophyta_X	Polar-centric-Mediophyceae	Chaetoceros	Chaetoceros_curvisetus	Bacillariophyta (Stramenopiles)
2267	0	0	0	12	1	0	0	0	0	0	0	0	0	0	0	Eukaryota	Alveolata	Dinoflagellata	Dinophyceae	Dinophyceae_X	Dinophyceae_XX	Dinophyceae_XXX	Dinophyceae_XXX_sp.	Dinoflagellata (Alveolata)
2268	0	0	0	0	0	0	0	0	0	0	0	0	3	17	0	Eukaryota	Rhizaria	Foraminifera	Monothalamids	Monothalamids_Clade-C	Monothalamids_Clade-C_X	Shinkaiya	Shinkaiya_lindsayi	Flagellated cells
2269	0	0	0	0	0	0	0	0	0	0	0	0	53	82	0	Eukaryota	Alveolata	Dinoflagellata	Syndiniales	Dino-Group-I	Dino-Group-I-Clade-1	Dino-Group-I-Clade-1_X	Dino-Group-I-Clade-1_X_sp.	Dinoflagellata (Alveolata)
2270	13	0	0	0	0	0	0	0	0	0	0	0	0	0	0	Eukaryota	Alveolata	Dinoflagellata	Dinophyceae	Gymnodiniales	Gymnodiniaceae	Gyrodinium	Gyrodinium_spirale	Dinoflagellata (Alveolata)
2271	0	0	0	0	0	0	42	0	58	53	13	14	0	0	0	Eukaryota	Hacrobia	Haptophyta	Prymnesiophyceae	Isochrysidales	Noelaerhabdaceae	Gephyrocapsa	Gephyrocapsa_oceanica	Flagellated cells
2272	0	0	0	0	0	0	18	0	11	0	0	0	0	0	0	Eukaryota	Stramenopiles	Ochrophyta	Bacillariophyta	Bacillariophyta_X	Polar-centric-Mediophyceae	Lauderia	Lauderia_annulata	Bacillariophyta (Stramenopiles)
2273	0	0	0	0	0	0	20	0	0	0	0	0	0	0	7	Eukaryota	Alveolata	Ciliophora	Spirotrichea	Strombidiida	Strombidiidae_H	Strombidiidae_H_X	Strombidiidae_H_X_sp.	Ciliophora (Alveolata)
2274	0	4	0	0	0	0	0	0	0	0	0	0	0	0	0	Eukaryota	Rhizaria	Cercozoa	Cercozoa_X	Cercozoa_XX	Cercozoa_XXX	Cercozoa_XXXX	Cercozoa_XXXX_sp.	Flagellated cells
2275	0	0	0	0	0	0	0	0	0	0	0	15	18	16	0	Eukaryota	Rhizaria	Cercozoa	Filosa-Imbricatea	Thaumatomonadida	Thaumatomonadidae	Thaumatomastix	Thaumatomastix_sp.	Flagellated cells
2279	3	0	0	0	0	0	0	0	0	0	0	0	0	0	0	Eukaryota	Rhizaria	Cercozoa	Filosa-Imbricatea	Filosa-Imbricatea_X	Novel-clade-2	Novel-clade-2_X	Novel-clade-2_X_sp.	Flagellated cells

## Sheet: Taxonomy
#ASV	Kingdom	Supergroup	Division	Class	Order	Family	Genus	Species	TAXA
1	Eukaryota	Alveolata	Ciliophora	CONThreeP	CONThreeP_X	CONThreeP_XX	Askenasia	Askenasia_sp.	Ciliophora (Alveolata)
2	Eukaryota	Alveolata	Dinoflagellata	Syndiniales	Dino-Group-I	Dino-Group-I-Clade-4	Dino-Group-I-Clade-4_X	Dino-Group-I-Clade-4_X_sp.	Dinoflagellata (Alveolata)
3	Eukaryota	Alveolata	Ciliophora	Phyllopharyngea	Suctoria	Ephelotidae	Ephelota	Ephelota_mammillata	Ciliophora (Alveolata)
5	Eukaryota	Stramenopiles	Ochrophyta	Chrysophyceae	Chrysophyceae_X	Chrysophyceae_Clade-C	Chrysophyceae_Clade-C_X	Chrysophyceae_Clade-C_X_sp.	Bacillariophyta (Stramenopiles)
6	Eukaryota	Alveolata	Ciliophora	Phyllopharyngea	Suctoria	Ephelotidae	Ephelota	Ephelota_mammillata	Ciliophora (Alveolata)
7	Eukaryota	Alveolata	Dinoflagellata	Dinophyceae	Dinophyceae_X	Dinophyceae_XX	Dinophyceae_XXX	Dinophyceae_XXX_sp.	Dinoflagellata (Alveolata)
9	Eukaryota	Alveolata	Dinoflagellata	Syndiniales	Dino-Group-I	Dino-Group-I-Clade-4	Dino-Group-I-Clade-4_X	Dino-Group-I-Clade-4_X_sp.	Dinoflagellata (Alveolata)
12	Eukaryota	Alveolata	Ciliophora	CONThreeP	CONThreeP_X	CONThreeP_XX	Askenasia	Askenasia_sp.	Ciliophora (Alveolata)
13	Eukaryota	Stramenopiles	Ochrophyta	Bacillariophyta	Bacillariophyta_X	Polar-centric-Mediophyceae	Thalassiosira	Thalassiosira_minima	Bacillariophyta (Stramenopiles)
14	Eukaryota	Alveolata	Dinoflagellata	Dinophyceae	Dinophyceae_X	Dinophyceae_XX	Dinophyceae_XXX	Dinophyceae_XXX_sp.	Dinoflagellata (Alveolata)
18	Eukaryota	Rhizaria	Cercozoa	Filosa-Thecofilosea	Cryomonadida	Protaspa-lineage	Protaspa-lineage_X	Protaspa-lineage_X_sp.	Flagellated cells
19	Eukaryota	Stramenopiles	Opalozoa	MAST-3	MAST-3E	MAST-3E_X	MAST-3E_XX	MAST-3E_XX_sp.	Bacillariophyta (Stramenopiles)
20	Eukaryota	Stramenopiles	Ochrophyta	Bacillariophyta	Bacillariophyta_X	Raphid-pennate	Cymbella	Cymbella_similis	Bacillariophyta (Stramenopiles)
21	Eukaryota	Alveolata	Dinoflagellata	Dinophyceae	Dinophyceae_X	Dinophyceae_XX	Dinophyceae_XXX	Dinophyceae_XXX_sp.	Dinoflagellata (Alveolata)
24	Eukaryota	Alveolata	Ciliophora	Spirotrichea	Choreotrichida	Strobilidiidae_E	Strobilidium_E	Strobilidium_caudatum	Ciliophora (Alveolata)
25	Eukaryota	Stramenopiles	Ochrophyta	Chrysophyceae	Chrysophyceae_X	Chrysophyceae_Clade-C	Spumella	Spumella_elongata	Bacillariophyta (Stramenopiles)
26	Eukaryota	Alveolata	Ciliophora	Spirotrichea	Tintinnida	Tintinnidae	Tintinnidae_X	Tintinnidae_X_sp.	Ciliophora (Alveolata)
27	Eukaryota	Rhizaria	Cercozoa	Filosa-Sarcomonadea	Cercomonadida	Cercomonadidae	Cercomonas	Cercomonas_alexieffi	Flagellated cells
28	Eukaryota	Stramenopiles	Ochrophyta	Bacillariophyta	Bacillariophyta_X	Polar-centric-Mediophyceae	Thalassiosira	Thalassiosira_minima	Bacillariophyta (Stramenopiles)
31	Eukaryota	Rhizaria	Cercozoa	Filosa-Thecofilosea	Cryomonadida	Protaspa-lineage	Protaspa	Protaspa_grandis	Flagellated cells
32	Eukaryota	Alveolata	Ciliophora	Spirotrichea	Strombidiida	Strombidiidae	Spirostrombidium	Spirostrombidium_agathae	Ciliophora (Alveolata)
33	Eukaryota	Stramenopiles	Ochrophyta	Bacillariophyta	Bacillariophyta_X	Raphid-pennate	Pleurosigma	Pleurosigma_intermedium	Bacillariophyta (Stramenopiles)
34	Eukaryota	Alveolata	Ciliophora	Spirotrichea	Choreotrichida	Strobilidiidae_I	Pelagostrobilidium	Pelagostrobilidium_sp.	Ciliophora (Alveolata)
35	Eukaryota	Opisthokonta	Mesomycetozoa	Ichthyosporea	Ichthyosphonida	Abeoformidae_Group_MAIP_1	Abeoformidae_Group_MAIP_1_X	Abeoformidae_Group_MAIP_1_X_sp.	Flagellated cells
36	Eukaryota	Alveolata	Ciliophora	CONThreeP	CONThreeP_X	CONThreeP_XX	Askenasia	Askenasia_sp.	Ciliophora (Alveolata)
37	Eukaryota	Alveolata	Dinoflagellata	Dinophyceae	Dinophyceae_X	Dinophyceae_XX	Dinophyceae_XXX	Dinophyceae_XXX_sp.	Dinoflagellata (Alveolata)
38	Eukaryota	Stramenopiles	Ochrophyta	Chrysophyceae	Chrysophyceae_X	Chrysophyceae_Clade-F	Chrysophyceae_Clade-F_X	Chrysophyceae_Clade-F_X_sp.	Bacillariophyta (Stramenopiles)
39	Eukaryota	Stramenopiles	Ochrophyta	Bacillariophyta	Bacillariophyta_X	Polar-centric-Mediophyceae	Thalassiosira	Thalassiosira_eccentrica	Bacillariophyta (Stramenopiles)
40	Eukaryota	Rhizaria	Cercozoa	Filosa-Thecofilosea	Ventricleftida	Ventrifissuridae	Ventrifissuridae_X	Ventrifissuridae_X_sp.	Flagellated cells
41	Eukaryota	Alveolata	Dinoflagellata	Dinophyceae	Dinophyceae_X	Dinophyceae_XX	Dinophyceae_XXX	Dinophyceae_XXX_sp.	Dinoflagellata (Alveolata)
42	Eukaryota	Alveolata	Dinoflagellata	Dinophyceae	Dinophyceae_X	Dinophyceae_XX	Dinophyceae_XXX	Dinophyceae_XXX_sp.	Dinoflagellata (Alveolata)
45	Eukaryota	Stramenopiles	Ochrophyta	Bacillariophyta	Bacillariophyta_X	Polar-centric-Mediophyceae	Thalassiosira	Thalassiosira_sp.	Bacillariophyta (Stramenopiles)
46	Eukaryota	Alveolata	Ciliophora	Spirotrichea	Tintinnida	Tintinnidae	Tintinnidae_X	Tintinnidae_X_sp.	Ciliophora (Alveolata)
48	Eukaryota	Alveolata	Ciliophora	Spirotrichea	Hypotrichia	Hypotrichia_X	Hypotrichia_XX	Hypotrichia_XX_sp.	Ciliophora (Alveolata)
50	Eukaryota	Stramenopiles	Ochrophyta	Chrysophyceae	Chrysophyceae_X	Chrysophyceae_Clade-F	Chrysophyceae_Clade-F_X	Chrysophyceae_Clade-F_X_sp.	Bacillariophyta (Stramenopiles)
51	Eukaryota	Alveolata	Ciliophora	CONThreeP	CONThreeP_X	Plagiocampidae	Plagiocampa	Plagiocampa_sp.	Ciliophora (Alveolata)
52	Eukaryota	Alveolata	Ciliophora	CONThreeP	CONThreeP_X	CONThreeP_XX	Askenasia	Askenasia_sp.	Ciliophora (Alveolata)
53	Eukaryota	Rhizaria	Cercozoa	Filosa-Thecofilosea	Cryomonadida	Protaspa-lineage	Protaspa-lineage_X	Protaspa-lineage_X_sp.	Flagellated cells
54	Eukaryota	Rhizaria	Cercozoa	Filosa-Thecofilosea	Cryomonadida	Protaspa-lineage	Protaspa-lineage_X	Protaspa-lineage_X_sp.	Flagellated cells
55	Eukaryota	Rhizaria	Cercozoa	Filosa-Sarcomonadea	Cercomonadida	Cercomonadidae	Cercomonas	Cercomonas_parincurva	Flagellated cells
56	Eukaryota	Alveolata	Ciliophora	CONTH_7	CONTH_7_X	CONTH_7_XX	CONTH_7_XXX	CONTH_7_XXX_sp.	Ciliophora (Alveolata)
57	Eukaryota	Alveolata	Dinoflagellata	Dinophyceae	Dinophyceae_X	Dinophyceae_XX	Dinophyceae_XXX	Dinophyceae_XXX_sp.	Dinoflagellata (Alveolata)
58	Eukaryota	Amoebozoa	Lobosa	Discosea-Longamoebia	Dermamoebida	Mayorellidae	Mayorella	Mayorella_sp.	Flagellated cells
60	Eukaryota	Rhizaria	Cercozoa	Filosa-Thecofilosea	Cryomonadida	Protaspa-lineage	Protaspa-lineage_X	Protaspa-lineage_X_sp.	Flagellated cells
62	Eukaryota	Alveolata	Ciliophora	CONTH_7	CONTH_7_X	CONTH_7_XX	CONTH_7_XXX	CONTH_7_XXX_sp.	Ciliophora (Alveolata)
63	Eukaryota	Alveolata	Dinoflagellata	Dinophyceae	Torodiniales	Torodiniaceae	Torodinium	Torodinium_robustum	Dinoflagellata (Alveolata)
65	Eukaryota	Hacrobia	Haptophyta	Prymnesiophyceae	Prymnesiales	Chrysochromulinaceae	Chrysochromulina	Chrysochromulina_sp.	Flagellated cells
66	Eukaryota	Alveolata	Dinoflagellata	Dinophyceae	Dinophyceae_X	Dinophyceae_XX	Dinophyceae_XXX	Dinophyceae_XXX_sp.	Dinoflagellata (Alveolata)
67	Eukaryota	Stramenopiles	Ochrophyta	Chrysophyceae	Chrysophyceae_X	Chrysophyceae_Clade-F	Paraphysomonas	Paraphysomonas_imperforata	Bacillariophyta (Stramenopiles)
68	Eukaryota	Rhizaria	Cercozoa	Filosa-Thecofilosea	Cryomonadida	Protaspa-lineage	Protaspa-lineage_X	Protaspa-lineage_X_sp.	Flagellated cells
69	Eukaryota	Stramenopiles	Ochrophyta	Bacillariophyta	Bacillariophyta_X	Raphid-pennate	Meuniera	Meuniera_membranacea	Bacillariophyta (Stramenopiles)
70	Eukaryota	Hacrobia	Haptophyta	Prymnesiophyceae	Prymnesiophyceae_Clade_E	Prymnesiophyceae_Clade_E_X	Prymnesiophyceae_Clade_E_XX	Prymnesiophyceae_Clade_E_XX_sp.	Flagellated cells
72	Eukaryota	Stramenopiles	Ochrophyta	Chrysophyceae	Chrysophyceae_X	Chrysophyceae_Clade-F	Paraphysomonas	Paraphysomonas_imperforata	Bacillariophyta (Stramenopiles)
73	Eukaryota	Alveolata	Ciliophora	Spirotrichea	Strombidiida	Strombidiidae	Parallelostrombidium	Parallelostrombidium_conicum	Ciliophora (Alveolata)
74	Eukaryota	Stramenopiles	Ochrophyta	Bacillariophyta	Bacillariophyta_X	Polar-centric-Mediophyceae	Thalassiosira	Thalassiosira_sp.	Bacillariophyta (Stramenopiles)
75	Eukaryota	Alveolata	Dinoflagellata	Syndiniales	Dino-Group-I	Dino-Group-I-Clade-4	Dino-Group-I-Clade-4_X	Dino-Group-I-Clade-4_X_sp.	Dinoflagellata (Alveolata)
76	Eukaryota	Alveolata	Dinoflagellata	Syndiniales	Dino-Group-II	Dino-Group-II-Clade-1	Dino-Group-II-Clade-1_X	Dino-Group-II-Clade-1_X_sp.	Dinoflagellata (Alveolata)
77	Eukaryota	Stramenopiles	Ochrophyta	Bacillariophyta	Bacillariophyta_X	Polar-centric-Mediophyceae	Polar-centric-Mediophyceae_X	Polar-centric-Mediophyceae_X_sp.	Bacillariophyta (Stramenopiles)
78	Eukaryota	Archaeplastida	Chlorophyta	Mamiellophyceae	Dolichomastigales	Dolichomastigaceae	Dolichomastigaceae-B	Dolichomastigaceae-B_sp.	Flagellated cells
79	Eukaryota	Alveolata	Ciliophora	Spirotrichea	Strombidiida	Strombidiidae	Parallelostrombidium	Parallelostrombidium_conicum	Ciliophora (Alveolata)
80	Eukaryota	Alveolata	Dinoflagellata	Dinophyceae	Dinophyceae_X	Dinophyceae_XX	Dinophyceae_XXX	Dinophyceae_XXX_sp.	Dinoflagellata (Alveolata)
81	Eukaryota	Rhizaria	Cercozoa	Filosa-Thecofilosea	Ventricleftida	Ventricleftida_X	Ventricleftida_XX	Ventricleftida_XX_sp.	Flagellated cells
83	Eukaryota	Opisthokonta	Mesomycetozoa	Ichthyosporea	Ichthyosphonida	Abeoformidae_Group_MAIP_1	Abeoformidae_Group_MAIP_1_X	Abeoformidae_Group_MAIP_1_X_sp.	Flagellated cells
84	Eukaryota	Alveolata	Dinoflagellata	Syndiniales	Dino-Group-II	Dino-Group-II-Clade-14	Dino-Group-II-Clade-14_X	Dino-Group-II-Clade-14_X_sp.	Dinoflagellata (Alveolata)
85	Eukaryota	Rhizaria	Cercozoa	Filosa-Thecofilosea	Cryomonadida	Protaspa-lineage	Protaspa-lineage_X	Protaspa-lineage_X_sp.	Flagellated cells
86	Eukaryota	Rhizaria	Cercozoa	Filosa-Thecofilosea	Cryomonadida	Protaspa-lineage	Protaspa-lineage_X	Protaspa-lineage_X_sp.	Flagellated cells
88	Eukaryota	Rhizaria	Cercozoa	Filosa-Imbricatea	Thaumatomonadida	Thaumatomonadidae	Thaumatomastix	Thaumatomastix_salina	Flagellated cells
90	Eukaryota	Opisthokonta	Mesomycetozoa	Ichthyosporea	Ichthyosphonida	Abeoformidae_Group_MAIP_1	Abeoformidae_Group_MAIP_1_X	Abeoformidae_Group_MAIP_1_X_sp.	Flagellated cells
91	Eukaryota	Alveolata	Ciliophora	Spirotrichea	Choreotrichida	Strobilidiidae_G	Strobilidiidae_G_X	Strobilidiidae_G_X_sp.	Ciliophora (Alveolata)
92	Eukaryota	Rhizaria	Cercozoa	Filosa-Thecofilosea	Ebriida	Botuliformidae	Botuliformidae_X	Botuliformidae_X_sp.	Flagellated cells
93	Eukaryota	Alveolata	Dinoflagellata	Syndiniales	Dino-Group-I	Dino-Group-I-Clade-4	Dino-Group-I-Clade-4_X	Dino-Group-I-Clade-4_X_sp.	Dinoflagellata (Alveolata)
96	Eukaryota	Alveolata	Dinoflagellata	Dinophyceae	Gymnodiniales	Kareniaceae	Karlodinium	Karlodinium_veneficum	Dinoflagellata (Alveolata)
97	Eukaryota	Alveolata	Ciliophora	Spirotrichea	Tintinnida	Tintinnidae	Tintinnidae_X	Tintinnidae_X_sp.	Ciliophora (Alveolata)
98	Eukaryota	Alveolata	Ciliophora	Spirotrichea	Choreotrichida	Strobilidiidae_I	Strobilidiidae_I_X	Strobilidiidae_I_X_sp.	Ciliophora (Alveolata)
99	Eukaryota	Opisthokonta	Mesomycetozoa	Ichthyosporea	Ichthyosphonida	Abeoformidae_Group_MAIP_2	Abeoformidae_Group_MAIP_2_X	Abeoformidae_Group_MAIP_2_X_sp.	Flagellated cells
100	Eukaryota	Amoebozoa	Conosa	Mycetozoa-Myxogastrea	Stemonitales-Physarales	Stemonitales-Physarales_X	Kelleromyxa	Kelleromyxa_fimicola	Flagellated cells
102	Eukaryota	Alveolata	Dinoflagellata	Dinophyta_X	Dinophyta_XX	Dinophyta_XXX	Dinophyta_XXXX	Dinophyta_XXXX_sp.	Dinoflagellata (Alveolata)
103	Eukaryota	Stramenopiles	Ochrophyta	Chrysophyceae	Chrysophyceae_X	Chrysophyceae_Clade-F	Paraphysomonas	Paraphysomonas_sp.	Bacillariophyta (Stramenopiles)
104	Eukaryota	Opisthokonta	Mesomycetozoa	Ichthyosporea	Ichthyosphonida	Abeoformidae_Group_MAIP_1	Abeoformidae_Group_MAIP_1_X	Abeoformidae_Group_MAIP_1_X_sp.	Flagellated cells
105	Eukaryota	Stramenopiles	Ochrophyta	Bolidophyceae	Parmales	Parmales_env_3	Parmales_env_3A	Parmales_env_3A_sp.	Bacillariophyta (Stramenopiles)
106	Eukaryota	Stramenopiles	Ochrophyta	Bacillariophyta	Bacillariophyta_X	Raphid-pennate	Raphid-pennate_X	Raphid-pennate_X_sp.	Bacillariophyta (Stramenopiles)
107	Eukaryota	Alveolata	Ciliophora	Spirotrichea	Strombidiida	Strombidiidae	Parallelostrombidium	Parallelostrombidium_conicum	Ciliophora (Alveolata)
108	Eukaryota	Rhizaria	Foraminifera	Monothalamids	Monothalamids_Clade-C	Monothalamids_Clade-C_X	Shinkaiya	Shinkaiya_lindsayi	Flagellated cells
112	Eukaryota	Rhizaria	Cercozoa	Filosa-Thecofilosea	Ventricleftida	Ventricleftida_X	Ventricleftida_XX	Ventricleftida_XX_sp.	Flagellated cells
113	Eukaryota	Stramenopiles	Opalozoa	MAST-3	MAST-3E	MAST-3E_X	MAST-3E_XX	MAST-3E_XX_sp.	Bacillariophyta (Stramenopiles)
114	Eukaryota	Stramenopiles	Opalozoa	MAST-3	MAST-3A	MAST-3A_X	MAST-3A_XX	MAST-3A_XX_sp.	Bacillariophyta (Stramenopiles)
115	Eukaryota	Rhizaria	Cercozoa	Filosa-Thecofilosea	Cryomonadida	Protaspa-lineage	Protaspa-lineage_X	Protaspa-lineage_X_sp.	Flagellated cells
116	Eukaryota	Alveolata	Ciliophora	CONTH_7	CONTH_7_X	CONTH_7_XX	CONTH_7_XXX	CONTH_7_XXX_sp.	Ciliophora (Alveolata)
117	Eukaryota	Rhizaria	Cercozoa	Chlorarachniophyceae	Chlorarachnida	Minorisa-lineage	Minorisa	Minorisa_minuta	Flagellated cells
119	Eukaryota	Alveolata	Dinoflagellata	Dinophyceae	Dinophyceae_X	Dinophyceae_XX	Dinophyceae_XXX	Dinophyceae_XXX_sp.	Dinoflagellata (Alveolata)
120	Eukaryota	Alveolata	Dinoflagellata	Dinophyceae	Dinophyceae_X	Dinophyceae_XX	Dinophyceae_XXX	Dinophyceae_XXX_sp.	Dinoflagellata (Alveolata)
121	Eukaryota	Alveolata	Ciliophora	Oligohymenophorea	Scuticociliatia_1	Thigmophryidae	Myxophyllum	Myxophyllum_sp.	Ciliophora (Alveolata)
122	Eukaryota	Alveolata	Dinoflagellata	Syndiniales	Dino-Group-II	Dino-Group-II-Clade-7	Dino-Group-II-Clade-7_X	Dino-Group-II-Clade-7_X_sp.	Dinoflagellata (Alveolata)
123	Eukaryota	Rhizaria	Cercozoa	Filosa-Thecofilosea	Cryomonadida	Protaspa-lineage	Protaspa-lineage_X	Protaspa-lineage_X_sp.	Flagellated cells
124	Eukaryota	Rhizaria	Cercozoa	Chlorarachniophyceae	Chlorarachnida	Minorisa-lineage	Minorisa-lineage_X	Minorisa-lineage_X_sp.	Flagellated cells
125	Eukaryota	Rhizaria	Cercozoa	Filosa-Imbricatea	Thaumatomonadida	Thaumatomonadidae	Reckertia	Reckertia_filosa	Flagellated cells
126	Eukaryota	Alveolata	Dinoflagellata	Dinophyceae	Peridiniales	Amphidiniopsidaceae	Archaeperidinium	Archaeperidinium_minutum	Dinoflagellata (Alveolata)
127	Eukaryota	Alveolata	Ciliophora	Spirotrichea	Tintinnida	Tintinnidiidae	Tintinnidium	Tintinnidium_sp.	Ciliophora (Alveolata)
128	Eukaryota	Rhizaria	Cercozoa	Filosa-Imbricatea	Marimonadida	Marimonadida_X	Marimonadida_XX	Marimonadida_XX_sp.	Flagellated cells
129	Eukaryota	Stramenopiles	Ochrophyta	Bacillariophyta	Bacillariophyta_X	Polar-centric-Mediophyceae	Thalassiosira	Thalassiosira_guillardii	Bacillariophyta (Stramenopiles)
131	Eukaryota	Rhizaria	Cercozoa	Filosa-Thecofilosea	Ventricleftida	Ventrifissuridae	Ventrifissuridae_X	Ventrifissuridae_X_sp.	Flagellated cells
133	Eukaryota	Alveolata	Ciliophora	Oligohymenophorea	Scuticociliatia_1	Philasterida	Parauronema	Parauronema_longum	Ciliophora (Alveolata)
136	Eukaryota	Alveolata	Dinoflagellata	Dinophyceae	Dinophyceae_X	Dinophyceae_XX	Dinophyceae_XXX	Dinophyceae_XXX_sp.	Dinoflagellata (Alveolata)
137	Eukaryota	Stramenopiles	Ochrophyta	Bacillariophyta	Bacillariophyta_X	Polar-centric-Mediophyceae	Thalassiosira	Thalassiosira_sp.	Bacillariophyta (Stramenopiles)
138	Eukaryota	Alveolata	Dinoflagellata	Dinophyceae	Dinophyceae_X	Ptychodiscaceae	Ptychodiscus	Ptychodiscus_noctiluca	Dinoflagellata (Alveolata)
139	Eukaryota	Alveolata	Ciliophora	Oligohymenophorea	Scuticociliatia_1	Philasterida	Philasterida_X	Philasterida_X_sp.	Ciliophora (Alveolata)
140	Eukaryota	Rhizaria	Cercozoa	Filosa-Imbricatea	Marimonadida	Marimonadida_X	Marimonadida_XX	Marimonadida_XX_sp.	Flagellated cells
143	Eukaryota	Alveolata	Ciliophora	CONThreeP	CONThreeP_X	CONThreeP_XX	Askenasia	Askenasia_sp.	Ciliophora (Alveolata)
145	Eukaryota	Rhizaria	Cercozoa	Filosa-Thecofilosea	Cryomonadida	Protaspa-lineage	Protaspa	Protaspa_grandis	Flagellated cells
146	Eukaryota	Stramenopiles	Ochrophyta	Bacillariophyta	Bacillariophyta_X	Radial-centric-basal-Coscinodiscophyceae	Leptocylindrus	Leptocylindrus_sp.	Bacillariophyta (Stramenopiles)
147	Eukaryota	Rhizaria	Cercozoa	Filosa-Thecofilosea	Cryomonadida	Protaspa-lineage	Protaspa-lineage_X	Protaspa-lineage_X_sp.	Flagellated cells
149	Eukaryota	Alveolata	Dinoflagellata	Syndiniales	Dino-Group-II	Dino-Group-II-Clade-10-and-11	Dino-Group-II-Clade-10-and-11_X	Dino-Group-II-Clade-10-and-11_X_sp.	Dinoflagellata (Alveolata)
150	Eukaryota	Hacrobia	Haptophyta	Prymnesiophyceae	Prymnesiophyceae_Clade_F	Prymnesiophyceae_Clade_F_X	Prymnesiophyceae_Clade_F_XX	Prymnesiophyceae_Clade_F_XX_sp.	Flagellated cells
151	Eukaryota	Alveolata	Dinoflagellata	Syndiniales	Dino-Group-I	Dino-Group-I-Clade-1	Dino-Group-I-Clade-1_X	Dino-Group-I-Clade-1_X_sp.	Dinoflagellata (Alveolata)
152	Eukaryota	Stramenopiles	Ochrophyta	Bacillariophyta	Bacillariophyta_X	Raphid-pennate	Nitzschia	Nitzschia_linearis	Bacillariophyta (Stramenopiles)
153	Eukaryota	Rhizaria	Cercozoa	Filosa-Sarcomonadea	Cercomonadida	Cercomonadidae	Eocercomonas	Eocercomonas_echina	Flagellated cells
155	Eukaryota	Stramenopiles	Ochrophyta	Bacillariophyta	Bacillariophyta_X	Polar-centric-Mediophyceae	Thalassiosira	Thalassiosira_tenera	Bacillariophyta (Stramenopiles)
156	Eukaryota	Stramenopiles	Ochrophyta	Bacillariophyta	Bacillariophyta_X	Radial-centric-basal-Coscinodiscophyceae	Guinardia	Guinardia_flaccida	Bacillariophyta (Stramenopiles)
157	Eukaryota	Alveolata	Ciliophora	Spirotrichea	Tintinnida	Eutintinnidae	Eutintinnus	Eutintinnus_tubulosus	Ciliophora (Alveolata)
158	Eukaryota	Rhizaria	Cercozoa	Filosa-Thecofilosea	Filosa-Thecofilosea_X	Mataza-lineage	Mataza-lineage_X	Mataza-lineage_X_sp.	Flagellated cells
159	Eukaryota	Rhizaria	Cercozoa	Filosa-Thecofilosea	Filosa-Thecofilosea_X	Novel-Clade-4	Novel-Clade-4_X	Novel-Clade-4_X_sp.	Flagellated cells
160	Eukaryota	Alveolata	Ciliophora	Spirotrichea	Tintinnida	Tintinnidae	Amphorellopsis	Amphorellopsis_acuta	Ciliophora (Alveolata)
161	Eukaryota	Stramenopiles	Ochrophyta	Bacillariophyta	Bacillariophyta_X	Polar-centric-Mediophyceae	Thalassiosira	Thalassiosira_oceanica	Bacillariophyta (Stramenopiles)
162	Eukaryota	Rhizaria	Cercozoa	Filosa-Thecofilosea	Ebriida	TAGIRI1-lineage	TAGIRI1-lineage_X	TAGIRI1-lineage_X_sp.	Flagellated cells
164	Eukaryota	Alveolata	Dinoflagellata	Dinophyceae	Peridiniales	Thoracosphaeraceae	Pentapharsodinium	Pentapharsodinium_tyrrhenicum	Dinoflagellata (Alveolata)
167	Eukaryota	Rhizaria	Cercozoa	Filosa-Thecofilosea	Cryomonadida	Cryothecomonas-lineage	Cryothecomonas	Cryothecomonas_sp.	Flagellated cells
168	Eukaryota	Hacrobia	Katablepharidophyta	Katablepharidaceae	Katablepharidales	Katablepharidales_X	Katablepharidales_XX	Katablepharidales_XX_sp.	Flagellated cells
170	Eukaryota	Hacrobia	Haptophyta	Prymnesiophyceae	Prymnesiales	Chrysochromulinaceae	Chrysochromulina	Chrysochromulina_sp.	Flagellated cells
171	Eukaryota	Alveolata	Dinoflagellata	Dinophyceae	Gymnodiniales	Kareniaceae	Karlodinium	Karlodinium_veneficum	Dinoflagellata (Alveolata)
172	Eukaryota	Stramenopiles	Ochrophyta	Bacillariophyta	Bacillariophyta_X	Radial-centric-basal-Coscinodiscophyceae	Radial-centric-basal-Coscinodiscophyceae_X	Radial-centric-basal-Coscinodiscophyceae_X_sp.	Bacillariophyta (Stramenopiles)
173	Eukaryota	Alveolata	Dinoflagellata	Dinophyceae	Suessiales	Suessiaceae	Protodinium	Protodinium_simplex	Dinoflagellata (Alveolata)
174	Eukaryota	Rhizaria	Cercozoa	Filosa-Thecofilosea	Cryomonadida	Protaspa-lineage	Protaspa	Protaspa_grandis	Flagellated cells
175	Eukaryota	Stramenopiles	Ochrophyta	Chrysophyceae	Chrysophyceae_X	Chrysophyceae_Clade-G	Chrysophyceae_Clade-G_X	Chrysophyceae_Clade-G_X_sp.	Bacillariophyta (Stramenopiles)
176	Eukaryota	Stramenopiles	Ochrophyta	Bacillariophyta	Bacillariophyta_X	Polar-centric-Mediophyceae	Thalassiosira	Thalassiosira_hendeyi	Bacillariophyta (Stramenopiles)
177	Eukaryota	Alveolata	Ciliophora	Spirotrichea	Strombidiida_B	Strombidiida_B_X	Strombidiida_B_XX	Strombidiida_B_XX_sp.	Ciliophora (Alveolata)
178	Eukaryota	Alveolata	Dinoflagellata	Dinophyceae	Dinophyceae_X	Dinophyceae_XX	Dinophyceae_XXX	Dinophyceae_XXX_sp.	Dinoflagellata (Alveolata)
179	Eukaryota	Rhizaria	Cercozoa	Filosa-Thecofilosea	Cryomonadida	Protaspa-lineage	Protaspa-lineage_X	Protaspa-lineage_X_sp.	Flagellated cells
181	Eukaryota	Rhizaria	Cercozoa	Filosa-Thecofilosea	Cryomonadida	Protaspa-lineage	Protaspa-lineage_X	Protaspa-lineage_X_sp.	Flagellated cells
182	Eukaryota	Opisthokonta	Mesomycetozoa	Ichthyosporea	Ichthyosphonida	Abeoformidae_Group_MAIP_2	Abeoformidae_Group_MAIP_2_X	Abeoformidae_Group_MAIP_2_X_sp.	Flagellated cells
183	Eukaryota	Alveolata	Ciliophora	Spirotrichea	Strombidiida	Strombidiidae_M	Strombidium_M	Strombidium_M_sp.	Ciliophora (Alveolata)
184	Eukaryota	Rhizaria	Cercozoa	Filosa-Imbricatea	Thaumatomonadida	Thaumatomonadidae	Reckertia	Reckertia_filosa	Flagellated cells
186	Eukaryota	Stramenopiles	Ochrophyta	Bacillariophyta	Bacillariophyta_X	Polar-centric-Mediophyceae	Thalassiosira	Thalassiosira_sp.	Bacillariophyta (Stramenopiles)
188	Eukaryota	Opisthokonta	Mesomycetozoa	Ichthyosporea	Ichthyosphonida	Abeoformidae_Group_MAIP_2	Abeoformidae_Group_MAIP_2_X	Abeoformidae_Group_MAIP_2_X_sp.	Flagellated cells
189	Eukaryota	Alveolata	Ciliophora	CONThreeP	CONThreeP_X	Plagiocampidae	Plagiocampa	Plagiocampa_sp.	Ciliophora (Alveolata)
190	Eukaryota	Rhizaria	Cercozoa	Filosa-Imbricatea	Marimonadida	Marimonadida_X	Marimonadida_XX	Marimonadida_XX_sp.	Flagellated cells
191	Eukaryota	Alveolata	Dinoflagellata	Syndiniales	Dino-Group-I	Dino-Group-I-Clade-4	Dino-Group-I-Clade-4_X	Dino-Group-I-Clade-4_X_sp.	Dinoflagellata (Alveolata)
192	Eukaryota	Alveolata	Dinoflagellata	Noctilucophyceae	Noctilucales	Noctilucaceae	Noctiluca	Noctiluca_scintillans	Dinoflagellata (Alveolata)
193	Eukaryota	Rhizaria	Cercozoa	Cercozoa_X	Cercozoa_XX	Cercozoa_XXX	Cercozoa_XXXX	Cercozoa_XXXX_sp.	Flagellated cells
194	Eukaryota	Rhizaria	Cercozoa	Filosa-Thecofilosea	Cryomonadida	Protaspa-lineage	Protaspa-lineage_X	Protaspa-lineage_X_sp.	Flagellated cells
196	Eukaryota	Alveolata	Dinoflagellata	Dinophyceae	Dinophyceae_X	Dinophyceae_XX	Dinophyceae_XXX	Dinophyceae_XXX_sp.	Dinoflagellata (Alveolata)
197	Eukaryota	Rhizaria	Cercozoa	Filosa-Thecofilosea	Cryomonadida	Protaspa-lineage	Protaspa-lineage_X	Protaspa-lineage_X_sp.	Flagellated cells
198	Eukaryota	Alveolata	Ciliophora	CONThreeP	CONThreeP_X	CONThreeP_XX	Askenasia	Askenasia_sp.	Ciliophora (Alveolata)
199	Eukaryota	Alveolata	Dinoflagellata	Dinophyceae	Peridiniales	Diplopsalidaceae	Diplopsalis	Diplopsalis_caspica	Dinoflagellata (Alveolata)
200	Eukaryota	Alveolata	Dinoflagellata	Dinophyceae	Dinophyceae_X	Dinophyceae_XX	Dinophyceae_XXX	Dinophyceae_XXX_sp.	Dinoflagellata (Alveolata)
201	Eukaryota	Opisthokonta	Mesomycetozoa	Ichthyosporea	Ichthyosphonida	Abeoformidae_Group_MAIP_2	Abeoformidae_Group_MAIP_2_X	Abeoformidae_Group_MAIP_2_X_sp.	Flagellated cells
202	Eukaryota	Stramenopiles	Ochrophyta	Bacillariophyta	Bacillariophyta_X	Polar-centric-Mediophyceae	Thalassiosira	Thalassiosira_sp.	Bacillariophyta (Stramenopiles)
203	Eukaryota	Alveolata	Ciliophora	CONThreeP	CONThreeP_X	Urotrichidae	Urotricha	Urotricha_sp.	Ciliophora (Alveolata)
204	Eukaryota	Alveolata	Dinoflagellata	Dinophyceae	Gymnodiniales	Gymnodiniaceae	Gyrodinium	Gyrodinium_sp.	Dinoflagellata (Alveolata)
205	Eukaryota	Hacrobia	Katablepharidophyta	Katablepharidaceae	Katablepharidales	Katablepharidales_X	Katablepharidales_XX	Katablepharidales_XX_sp.	Flagellated cells
206	Eukaryota	Alveolata	Dinoflagellata	Syndiniales	Dino-Group-II	Dino-Group-II-Clade-1	Dino-Group-II-Clade-1_X	Dino-Group-II-Clade-1_X_sp.	Dinoflagellata (Alveolata)
207	Eukaryota	Stramenopiles	Ochrophyta	Chrysophyceae	Chrysophyceae_X	Chrysophyceae_Clade-H	Chrysophyceae_Clade-H_X	Chrysophyceae_Clade-H_X_sp.	Bacillariophyta (Stramenopiles)
208	Eukaryota	Alveolata	Dinoflagellata	Dinophyceae	Gymnodiniales	Gymnodiniaceae	Gyrodinium	Gyrodinium_sp.	Dinoflagellata (Alveolata)
209	Eukaryota	Stramenopiles	Opalozoa	MAST-3	MAST-3A	MAST-3A_X	MAST-3A_XX	MAST-3A_XX_sp.	Bacillariophyta (Stramenopiles)
210	Eukaryota	Alveolata	Dinoflagellata	Syndiniales	Dino-Group-II	Dino-Group-II-Clade-1	Dino-Group-II-Clade-1_X	Dino-Group-II-Clade-1_X_sp.	Dinoflagellata (Alveolata)
211	Eukaryota	Alveolata	Dinoflagellata	Dinophyceae	Peridiniales	Heterocapsaceae	Heterocapsa	Heterocapsa_nei/rotundata	Dinoflagellata (Alveolata)
213	Eukaryota	Stramenopiles	Ochrophyta	Chrysophyceae	Chrysophyceae_X	Chrysophyceae_Clade-H	Chrysophyceae_Clade-H_X	Chrysophyceae_Clade-H_X_sp.	Bacillariophyta (Stramenopiles)
214	Eukaryota	Alveolata	Ciliophora	CONThreeP	CONThreeP_X	CONThreeP_XX	Askenasia	Askenasia_sp.	Ciliophora (Alveolata)
216	Eukaryota	Stramenopiles	Ochrophyta	Chrysophyceae	Chrysophyceae_X	Chrysophyceae_Clade-H	Chrysophyceae_Clade-H_X	Chrysophyceae_Clade-H_X_sp.	Bacillariophyta (Stramenopiles)
217	Eukaryota	Stramenopiles	Stramenopiles_X	Stramenopiles_X-Group-7	Stramenopiles_X-Group-7_X	Stramenopiles_X-Group-7_XX	Stramenopiles_X-Group-7_XXX	Stramenopiles_X-Group-7_XXX_sp.	Bacillariophyta (Stramenopiles)
218	Eukaryota	Rhizaria	Cercozoa	Filosa-Thecofilosea	Cryomonadida	Cryothecomonas-lineage	Cryothecomonas	Cryothecomonas_aestivalis	Flagellated cells
219	Eukaryota	Rhizaria	Cercozoa	Filosa-Thecofilosea	Cryomonadida	Protaspa-lineage	Protaspa-lineage_X	Protaspa-lineage_X_sp.	Flagellated cells
220	Eukaryota	Archaeplastida	Chlorophyta	Mamiellophyceae	Dolichomastigales	Dolichomastigaceae	Dolichomastigaceae-B	Dolichomastigaceae-B_sp.	Flagellated cells
221	Eukaryota	Alveolata	Dinoflagellata	Dinophyceae	Gymnodiniales	Kareniaceae	Karlodinium	Karlodinium_veneficum	Dinoflagellata (Alveolata)
223	Eukaryota	Stramenopiles	Ochrophyta	Chrysophyceae	Chrysophyceae_X	Chrysophyceae_Clade-H	Chrysophyceae_Clade-H_X	Chrysophyceae_Clade-H_X_sp.	Bacillariophyta (Stramenopiles)
224	Eukaryota	Rhizaria	Cercozoa	Filosa-Thecofilosea	Cryomonadida	Protaspa-lineage	Protaspa-lineage_X	Protaspa-lineage_X_sp.	Flagellated cells
227	Eukaryota	Alveolata	Ciliophora	CONThreeP	CONThreeP_X	CONThreeP_XX	Askenasia	Askenasia_sp.	Ciliophora (Alveolata)
228	Eukaryota	Rhizaria	Cercozoa	Filosa-Thecofilosea	Cryomonadida	Cryothecomonas-lineage	Cryothecomonas	Cryothecomonas_aestivalis	Flagellated cells
229	Eukaryota	Rhizaria	Cercozoa	Filosa-Thecofilosea	Cryomonadida	Protaspa-lineage	Protaspa	Protaspa_grandis	Flagellated cells
230	Eukaryota	Alveolata	Ciliophora	Spirotrichea	Tintinnida	TIN_02	Rhizodomus	Rhizodomus_tagatzi	Ciliophora (Alveolata)
231	Eukaryota	Opisthokonta	Mesomycetozoa	Ichthyosporea	Ichthyosphonida	Abeoformidae_Group_MAIP_2	Abeoformidae_Group_MAIP_2_X	Abeoformidae_Group_MAIP_2_X_sp.	Flagellated cells
232	Eukaryota	Rhizaria	Cercozoa	Filosa-Thecofilosea	Filosa-Thecofilosea_X	Novel-Clade-4	Novel-Clade-4_X	Novel-Clade-4_X_sp.	Flagellated cells
233	Eukaryota	Alveolata	Ciliophora	CONThreeP	CONThreeP_X	CONThreeP_XX	Askenasia	Askenasia_sp.	Ciliophora (Alveolata)
234	Eukaryota	Stramenopiles	Ochrophyta	Bacillariophyta	Bacillariophyta_X	Polar-centric-Mediophyceae	Thalassiosira	Thalassiosira_sp.	Bacillariophyta (Stramenopiles)
237	Eukaryota	Alveolata	Dinoflagellata	Dinophyceae	Dinophyceae_X	Dinophyceae_XX	Dinophyceae_XXX	Dinophyceae_XXX_sp.	Dinoflagellata (Alveolata)
238	Eukaryota	Rhizaria	Cercozoa	Filosa-Thecofilosea	Ebriida	Botuliformidae	Botuliforma	Botuliforma_benthica	Flagellated cells
239	Eukaryota	Alveolata	Dinoflagellata	Dinophyceae	Peridiniales	Heterocapsaceae	Heterocapsa	Heterocapsa_nei/rotundata	Dinoflagellata (Alveolata)
242	Eukaryota	Stramenopiles	Ochrophyta	Bolidophyceae	Parmales	Parmales_env_3	Parmales_env_3_X	Parmales_env_3_X_sp.	Bacillariophyta (Stramenopiles)
243	Eukaryota	Stramenopiles	Ochrophyta	Chrysophyceae	Chrysophyceae_X	Chrysophyceae_Clade-H	Chrysophyceae_Clade-H_X	Chrysophyceae_Clade-H_X_sp.	Bacillariophyta (Stramenopiles)
247	Eukaryota	Stramenopiles	Ochrophyta	Bacillariophyta	Bacillariophyta_X	Polar-centric-Mediophyceae	Thalassiosira	Thalassiosira_sp.	Bacillariophyta (Stramenopiles)
248	Eukaryota	Archaeplastida	Chlorophyta	Mamiellophyceae	Dolichomastigales	Dolichomastigaceae	Dolichomastigaceae-B	Dolichomastigaceae-B_sp.	Flagellated cells
249	Eukaryota	Alveolata	Ciliophora	Spirotrichea	Choreotrichida	Strobilidiidae_A	Strobilidiidae_A_X	Strobilidiidae_A_X_sp.	Ciliophora (Alveolata)
250	Eukaryota	Rhizaria	Cercozoa	Filosa-Thecofilosea	Cryomonadida	Cryothecomonas-lineage	Cryothecomonas	Cryothecomonas_aestivalis	Flagellated cells
251	Eukaryota	Alveolata	Dinoflagellata	Syndiniales	Dino-Group-II	Dino-Group-II-Clade-1	Dino-Group-II-Clade-1_X	Dino-Group-II-Clade-1_X_sp.	Dinoflagellata (Alveolata)
252	Eukaryota	Rhizaria	Cercozoa	Filosa-Thecofilosea	Ventricleftida	Ventrifissuridae	Ventrifissuridae_X	Ventrifissuridae_X_sp.	Flagellated cells
253	Eukaryota	Alveolata	Dinoflagellata	Noctilucophyceae	Noctilucales	Noctilucaceae	Noctiluca	Noctiluca_scintillans	Dinoflagellata (Alveolata)
254	Eukaryota	Alveolata	Ciliophora	Spirotrichea	Strombidiida	Strombidiidae_M	Strombidiidae_M_X	Strombidiidae_M_X_sp.	Ciliophora (Alveolata)
256	Eukaryota	Stramenopiles	Ochrophyta	Chrysophyceae	Chrysophyceae_X	Chrysophyceae_Clade-H	Chrysophyceae_Clade-H_X	Chrysophyceae_Clade-H_X_sp.	Bacillariophyta (Stramenopiles)
258	Eukaryota	Alveolata	Ciliophora	Spirotrichea	Strombidiida_G	Strombidiida_G_X	Strombidiida_G_XX	Strombidiida_G_XX_sp.	Ciliophora (Alveolata)
259	Eukaryota	Stramenopiles	Ochrophyta	Bacillariophyta	Bacillariophyta_X	Polar-centric-Mediophyceae	Thalassiosira	Thalassiosira_sp.	Bacillariophyta (Stramenopiles)
260	Eukaryota	Alveolata	Dinoflagellata	Syndiniales	Dino-Group-II	Dino-Group-II-Clade-13	Dino-Group-II-Clade-13_X	Dino-Group-II-Clade-13_X_sp.	Dinoflagellata (Alveolata)
261	Eukaryota	Alveolata	Ciliophora	Spirotrichea	Choreotrichida	Strombidinopsidae	Parastrombidinopsis	Parastrombidinopsis_shimi	Ciliophora (Alveolata)
262	Eukaryota	Alveolata	Dinoflagellata	Dinophyceae	Gymnodiniales	Gymnodiniaceae	Bispinodinium	Bispinodinium_angelaceum	Dinoflagellata (Alveolata)
263	Eukaryota	Alveolata	Dinoflagellata	Syndiniales	Dino-Group-II	Dino-Group-II-Clade-22	Dino-Group-II-Clade-22_X	Dino-Group-II-Clade-22_X_sp.	Dinoflagellata (Alveolata)
264	Eukaryota	Alveolata	Ciliophora	Spirotrichea	Choreotrichida	Leegaardiellidae_B	Leegaardiella	Leegaardiella_sp.	Ciliophora (Alveolata)
267	Eukaryota	Alveolata	Dinoflagellata	Syndiniales	Dino-Group-II	Dino-Group-II-Clade-8	Dino-Group-II-Clade-8_X	Dino-Group-II-Clade-8_X_sp.	Dinoflagellata (Alveolata)
268	Eukaryota	Rhizaria	Cercozoa	Filosa-Imbricatea	Marimonadida	Marimonadida_X	Marimonadida_XX	Marimonadida_XX_sp.	Flagellated cells
269	Eukaryota	Alveolata	Dinoflagellata	Dinophyceae	Dinophyceae_X	Dinophyceae_XX	Dinophyceae_XXX	Dinophyceae_XXX_sp.	Dinoflagellata (Alveolata)
270	Eukaryota	Rhizaria	Cercozoa	Chlorarachniophyceae	Chlorarachniophyceae_X	NPK2-lineage	NPK2-lineage_X	NPK2-lineage_X_sp.	Flagellated cells
272	Eukaryota	Alveolata	Dinoflagellata	Syndiniales	Dino-Group-I	Dino-Group-I-Clade-4	Dino-Group-I-Clade-4_X	Dino-Group-I-Clade-4_X_sp.	Dinoflagellata (Alveolata)
274	Eukaryota	Stramenopiles	Ochrophyta	Chrysophyceae	Chrysophyceae_X	Chrysophyceae_Clade-H	Chrysophyceae_Clade-H_X	Chrysophyceae_Clade-H_X_sp.	Bacillariophyta (Stramenopiles)
275	Eukaryota	Stramenopiles	Opalozoa	MAST-3	MAST-3J	MAST-3J_X	MAST-3J_XX	MAST-3J_XX_sp.	Bacillariophyta (Stramenopiles)
277	Eukaryota	Alveolata	Ciliophora	Spirotrichea	Choreotrichida	Strobilidiidae_G	Strobilidiidae_G_X	Strobilidiidae_G_X_sp.	Ciliophora (Alveolata)
279	Eukaryota	Hacrobia	Katablepharidophyta	Katablepharidaceae	Katablepharidales	Katablepharidales_X	Katablepharidales_XX	Katablepharidales_XX_sp.	Flagellated cells
280	Eukaryota	Stramenopiles	Ochrophyta	Chrysophyceae	Chrysophyceae_X	Chrysophyceae_Clade-H	Chrysophyceae_Clade-H_X	Chrysophyceae_Clade-H_X_sp.	Bacillariophyta (Stramenopiles)
281	Eukaryota	Stramenopiles	Ochrophyta	Chrysophyceae	Chrysophyceae_X	Chrysophyceae_Clade-H	Chrysophyceae_Clade-H_X	Chrysophyceae_Clade-H_X_sp.	Bacillariophyta (Stramenopiles)
282	Eukaryota	Stramenopiles	Ochrophyta	Chrysophyceae	Chrysophyceae_X	Chrysophyceae_Clade-H	Chrysophyceae_Clade-H_X	Chrysophyceae_Clade-H_X_sp.	Bacillariophyta (Stramenopiles)
283	Eukaryota	Rhizaria	Cercozoa	Filosa-Sarcomonadea	Glissomonadida	Allapsidae	Viridiraptor	Viridiraptor_sp.	Flagellated cells
284	Eukaryota	Alveolata	Dinoflagellata	Syndiniales	Dino-Group-II	Dino-Group-II-Clade-5	Dino-Group-II-Clade-5_X	Dino-Group-II-Clade-5_X_sp.	Dinoflagellata (Alveolata)
285	Eukaryota	Rhizaria	Cercozoa	Filosa-Imbricatea	Euglyphida	Euglyphida_X	Euglyphida_XX	Euglyphida_XX_sp.	Flagellated cells
287	Eukaryota	Hacrobia	Haptophyta	Prymnesiophyceae	Phaeocystales	Phaeocystaceae	Phaeocystis	Phaeocystis_globosa	Flagellated cells
289	Eukaryota	Amoebozoa	Conosa	Mycetozoa-Myxogastrea	Stemonitales-Physarales	Stemonitales-Physarales_X	Kelleromyxa	Kelleromyxa_fimicola	Flagellated cells
291	Eukaryota	Rhizaria	Cercozoa	Filosa-Thecofilosea	Cryomonadida	Cryothecomonas-lineage	Cryothecomonas	Cryothecomonas_aestivalis	Flagellated cells
292	Eukaryota	Alveolata	Ciliophora	Spirotrichea	Choreotrichida	Strombidinopsidae	Parastrombidinopsis	Parastrombidinopsis_sp.	Ciliophora (Alveolata)
293	Eukaryota	Rhizaria	Cercozoa	Filosa-Thecofilosea	Cryomonadida	Protaspa-lineage	Protaspa-lineage_X	Protaspa-lineage_X_sp.	Flagellated cells
295	Eukaryota	Alveolata	Dinoflagellata	Syndiniales	Dino-Group-II	Dino-Group-II-Clade-22	Dino-Group-II-Clade-22_X	Dino-Group-II-Clade-22_X_sp.	Dinoflagellata (Alveolata)
296	Eukaryota	Alveolata	Ciliophora	Spirotrichea	Choreotrichida	Strobilidiidae_I	Pelagostrobilidium	Pelagostrobilidium_minutum	Ciliophora (Alveolata)
297	Eukaryota	Stramenopiles	Ochrophyta	Bacillariophyta	Bacillariophyta_X	Raphid-pennate	Pleurosigma	Pleurosigma_intermedium	Bacillariophyta (Stramenopiles)
298	Eukaryota	Alveolata	Dinoflagellata	Dinophyceae	Dinophyceae_X	Dinophyceae_XX	Dinophyceae_XXX	Dinophyceae_XXX_sp.	Dinoflagellata (Alveolata)
299	Eukaryota	Alveolata	Dinoflagellata	Syndiniales	Dino-Group-II	Dino-Group-II-Clade-14	Dino-Group-II-Clade-14_X	Dino-Group-II-Clade-14_X_sp.	Dinoflagellata (Alveolata)
300	Eukaryota	Alveolata	Ciliophora	Spirotrichea	Strombidiida	Strombidiidae	Strombidiidae_X	Strombidiidae_X_sp.	Ciliophora (Alveolata)
301	Eukaryota	Rhizaria	Cercozoa	Chlorarachniophyceae	Chlorarachniophyceae_X	NPK2-lineage	NPK2-lineage_X	NPK2-lineage_X_sp.	Flagellated cells
302	Eukaryota	Rhizaria	Cercozoa	Filosa-Thecofilosea	Cryomonadida	Rhogostoma-lineage	Rhogostoma	Rhogostoma_minus	Flagellated cells
303	Eukaryota	Alveolata	Dinoflagellata	Syndiniales	Dino-Group-II	Dino-Group-II-Clade-2	Dino-Group-II-Clade-2_X	Dino-Group-II-Clade-2_X_sp.	Dinoflagellata (Alveolata)
304	Eukaryota	Rhizaria	Cercozoa	Cercozoa_X	Cercozoa_XX	Cercozoa_XXX	Cercozoa_XXXX	Cercozoa_XXXX_sp.	Flagellated cells
305	Eukaryota	Rhizaria	Cercozoa	Filosa-Thecofilosea	Cryomonadida	Protaspa-lineage	Protaspa	Protaspa_grandis	Flagellated cells
306	Eukaryota	Rhizaria	Cercozoa	Filosa-Thecofilosea	Cryomonadida	Protaspa-lineage	Protaspa-lineage_X	Protaspa-lineage_X_sp.	Flagellated cells
308	Eukaryota	Alveolata	Dinoflagellata	Dinophyceae	Dinophyceae_X	Dinophyceae_XX	Dinophyceae_XXX	Dinophyceae_XXX_sp.	Dinoflagellata (Alveolata)
309	Eukaryota	Alveolata	Ciliophora	Spirotrichea	Strombidiida_B	Strombidiida_B_X	Strombidiida_B_XX	Strombidiida_B_XX_sp.	Ciliophora (Alveolata)
310	Eukaryota	Alveolata	Ciliophora	Spirotrichea	Strombidiida	Strombidiidae_H	Strombidiidae_H_X	Strombidiidae_H_X_sp.	Ciliophora (Alveolata)
312	Eukaryota	Alveolata	Dinoflagellata	Dinophyceae	Dinophyceae_X	Dinophyceae_XX	Dinophyceae_XXX	Dinophyceae_XXX_sp.	Dinoflagellata (Alveolata)
314	Eukaryota	Alveolata	Dinoflagellata	Dinophyceae	Peridiniales	Amphidiniopsidaceae	Islandinium	Islandinium_tricingulatum	Dinoflagellata (Alveolata)
315	Eukaryota	Rhizaria	Cercozoa	Filosa-Thecofilosea	Cryomonadida	Protaspa-lineage	Protaspa	Protaspa_grandis	Flagellated cells
316	Eukaryota	Stramenopiles	Opalozoa	MAST-3	MAST-3A	MAST-3A_X	MAST-3A_XX	MAST-3A_XX_sp.	Bacillariophyta (Stramenopiles)
317	Eukaryota	Alveolata	Ciliophora	Spirotrichea	Strombidiida_G	Strombidiida_G_X	Strombidiida_G_XX	Strombidiida_G_XX_sp.	Ciliophora (Alveolata)
318	Eukaryota	Stramenopiles	Ochrophyta	Bacillariophyta	Bacillariophyta_X	Polar-centric-Mediophyceae	Thalassiosira	Thalassiosira_allenii	Bacillariophyta (Stramenopiles)
319	Eukaryota	Opisthokonta	Mesomycetozoa	Ichthyosporea	Ichthyosphonida	Ichthyophonidae_Eccrinales	Eccrinidus	Eccrinidus_flexilis	Flagellated cells
320	Eukaryota	Rhizaria	Cercozoa	Filosa-Thecofilosea	Ventricleftida	Ventrifissuridae	Ventrifissuridae_X	Ventrifissuridae_X_sp.	Flagellated cells
321	Eukaryota	Rhizaria	Cercozoa	Filosa-Thecofilosea	Cryomonadida	Protaspa-lineage	Protaspa-lineage_X	Protaspa-lineage_X_sp.	Flagellated cells
322	Eukaryota	Rhizaria	Cercozoa	Filosa-Thecofilosea	Cryomonadida	Protaspa-lineage	Protaspa-lineage_X	Protaspa-lineage_X_sp.	Flagellated cells
323	Eukaryota	Alveolata	Dinoflagellata	Dinophyceae	Peridiniales	Thoracosphaeraceae	Scrippsiella	Scrippsiella_acuminata	Dinoflagellata (Alveolata)
324	Eukaryota	Stramenopiles	Ochrophyta	Bacillariophyta	Bacillariophyta_X	Polar-centric-Mediophyceae	Thalassiosira	Thalassiosira_sp.	Bacillariophyta (Stramenopiles)
328	Eukaryota	Hacrobia	Haptophyta	Prymnesiophyceae	Phaeocystales	Phaeocystaceae	Phaeocystis	Phaeocystis_globosa	Flagellated cells
329	Eukaryota	Alveolata	Dinoflagellata	Dinophyceae	Gymnodiniales	Gymnodiniaceae	Gyrodinium	Gyrodinium_heterogrammum	Dinoflagellata (Alveolata)
330	Eukaryota	Alveolata	Ciliophora	Phyllopharyngea	Suctoria	Ephelotidae	Ephelota	Ephelota_mammillata	Ciliophora (Alveolata)
331	Eukaryota	Rhizaria	Cercozoa	Filosa-Thecofilosea	Cryomonadida	Protaspa-lineage	Protaspa-lineage_X	Protaspa-lineage_X_sp.	Flagellated cells
332	Eukaryota	Alveolata	Ciliophora	Spirotrichea	Choreotrichida	Lynnellidae	Lynnella	Lynnella_semiglobulosa	Ciliophora (Alveolata)
333	Eukaryota	Rhizaria	Cercozoa	Filosa-Thecofilosea	Filosa-Thecofilosea_X	Mataza-lineage	Mataza-lineage_X	Mataza-lineage_X_sp.	Flagellated cells
335	Eukaryota	Hacrobia	Katablepharidophyta	Katablepharidaceae	Katablepharidales	Katablepharidales_X	Katablepharidales_XX	Katablepharidales_XX_sp.	Flagellated cells
336	Eukaryota	Stramenopiles	Ochrophyta	Bacillariophyta	Bacillariophyta_X	Raphid-pennate	Navicula	Navicula_cryptocephala_var._veneta	Bacillariophyta (Stramenopiles)
337	Eukaryota	Alveolata	Dinoflagellata	Dinophyceae	Suessiales	Suessiaceae	Protodinium	Protodinium_simplex	Dinoflagellata (Alveolata)
338	Eukaryota	Stramenopiles	Ochrophyta	Bacillariophyta	Bacillariophyta_X	Radial-centric-basal-Coscinodiscophyceae	Rhizosolenia	Rhizosolenia_setigera	Bacillariophyta (Stramenopiles)
340	Eukaryota	Alveolata	Dinoflagellata	Dinophyceae	Dinophyceae_X	Dinophyceae_XX	Dinophyceae_XXX	Dinophyceae_XXX_sp.	Dinoflagellata (Alveolata)
341	Eukaryota	Alveolata	Ciliophora	Spirotrichea	Strombidiida_G	Strombidiida_G_X	Strombidiida_G_XX	Strombidiida_G_XX_sp.	Ciliophora (Alveolata)
342	Eukaryota	Stramenopiles	Ochrophyta	Chrysophyceae	Chrysophyceae_X	Chrysophyceae_Clade-H	Chrysophyceae_Clade-H_X	Chrysophyceae_Clade-H_X_sp.	Bacillariophyta (Stramenopiles)
343	Eukaryota	Rhizaria	Cercozoa	Filosa-Sarcomonadea	Glissomonadida	Sandonidae	Sandonidae_X	Sandonidae_X_sp.	Flagellated cells
344	Eukaryota	Rhizaria	Cercozoa	Filosa-Thecofilosea	Ventricleftida	Ventrifissuridae	Ventrifissura	Ventrifissura_artocarpoidea	Flagellated cells
345	Eukaryota	Stramenopiles	Ochrophyta	Bacillariophyta	Bacillariophyta_X	Polar-centric-Mediophyceae	Chaetoceros	Chaetoceros_eibenii	Bacillariophyta (Stramenopiles)
346	Eukaryota	Stramenopiles	Opalozoa	MAST-3	MAST-3F	MAST-3F_X	MAST-3F_XX	MAST-3F_XX_sp.	Bacillariophyta (Stramenopiles)
347	Eukaryota	Rhizaria	Cercozoa	Filosa-Thecofilosea	Cryomonadida	Protaspa-lineage	Protaspa-lineage_X	Protaspa-lineage_X_sp.	Flagellated cells
348	Eukaryota	Alveolata	Dinoflagellata	Dinophyceae	Suessiales	Suessiaceae	Pelagodinium	Pelagodinium_beii	Dinoflagellata (Alveolata)
349	Eukaryota	Stramenopiles	Ochrophyta	Bacillariophyta	Bacillariophyta_X	Radial-centric-basal-Coscinodiscophyceae	Rhizosolenia	Rhizosolenia_fallax	Bacillariophyta (Stramenopiles)
351	Eukaryota	Rhizaria	Cercozoa	Filosa-Imbricatea	Thaumatomonadida	Thaumatomonadidae	Reckertia	Reckertia_filosa	Flagellated cells
353	Eukaryota	Stramenopiles	Opalozoa	MAST-3	MAST-3A	MAST-3A_X	MAST-3A_XX	MAST-3A_XX_sp.	Bacillariophyta (Stramenopiles)
354	Eukaryota	Hacrobia	Katablepharidophyta	Katablepharidaceae	Katablepharidales	Katablepharidales_X	Katablepharidales_XX	Katablepharidales_XX_sp.	Flagellated cells
355	Eukaryota	Rhizaria	Cercozoa	Filosa-Thecofilosea	Cryomonadida	Cryomonadida_X	Cryomonadida_XX	Cryomonadida_XX_sp.	Flagellated cells
357	Eukaryota	Alveolata	Ciliophora	Spirotrichea	Strombidiida	Strombidiidae_Q	Strombidiidae_Q_X	Strombidiidae_Q_X_sp.	Ciliophora (Alveolata)
358	Eukaryota	Alveolata	Dinoflagellata	Dinophyceae	Gymnodiniales	Gymnodiniaceae	Bispinodinium	Bispinodinium_angelaceum	Dinoflagellata (Alveolata)
359	Eukaryota	Rhizaria	Cercozoa	Filosa-Imbricatea	Thaumatomonadida	Thaumatomonadidae	Thaumatomastix	Thaumatomastix_sp.	Flagellated cells
360	Eukaryota	Alveolata	Dinoflagellata	Dinophyceae	Dinophyceae_X	Dinophyceae_XX	Dinophyceae_XXX	Dinophyceae_XXX_sp.	Dinoflagellata (Alveolata)
361	Eukaryota	Archaeplastida	Chlorophyta	Mamiellophyceae	Dolichomastigales	Dolichomastigaceae	Dolichomastigaceae-B	Dolichomastigaceae-B_sp.	Flagellated cells
362	Eukaryota	Alveolata	Dinoflagellata	Syndiniales	Dino-Group-II	Dino-Group-II-Clade-46	Dino-Group-II-Clade-46_X	Dino-Group-II-Clade-46_X_sp.	Dinoflagellata (Alveolata)
365	Eukaryota	Hacrobia	Centroheliozoa	Centroheliozoa_X	Pterocystida	Pterocystida_X	Pterocystida_XX	Pterocystida_XX_sp.	Flagellated cells
366	Eukaryota	Archaeplastida	Chlorophyta	Mamiellophyceae	Mamiellales	Bathycoccaceae	Bathycoccus	Bathycoccus_prasinos	Flagellated cells
367	Eukaryota	Rhizaria	Cercozoa	Filosa-Imbricatea	Marimonadida	Marimonadida_X	Pseudopirsonia	Pseudopirsonia_mucosa	Flagellated cells
368	Eukaryota	Stramenopiles	Ochrophyta	Chrysophyceae	Chrysophyceae_X	Chrysophyceae_Clade-H	Chrysophyceae_Clade-H_X	Chrysophyceae_Clade-H_X_sp.	Bacillariophyta (Stramenopiles)
369	Eukaryota	Stramenopiles	Ochrophyta	Bacillariophyta	Bacillariophyta_X	Raphid-pennate	Cylindrotheca	Cylindrotheca_sp.	Bacillariophyta (Stramenopiles)
370	Eukaryota	Hacrobia	Centroheliozoa	Centroheliozoa_X	Pterocystida	Pterocystida_X	Pterocystida_XX	Pterocystida_XX_sp.	Flagellated cells
371	Eukaryota	Rhizaria	Cercozoa	Filosa-Imbricatea	Filosa-Imbricatea_X	Novel-clade-2	Novel-clade-2_X	Novel-clade-2_X_sp.	Flagellated cells
373	Eukaryota	Alveolata	Dinoflagellata	Syndiniales	Dino-Group-I	Dino-Group-I-Clade-3	Dino-Group-I-Clade-3_X	Dino-Group-I-Clade-3_X_sp.	Dinoflagellata (Alveolata)
374	Eukaryota	Stramenopiles	Ochrophyta	Bacillariophyta	Bacillariophyta_X	Raphid-pennate	Meuniera	Meuniera_membranacea	Bacillariophyta (Stramenopiles)
375	Eukaryota	Alveolata	Ciliophora	Spirotrichea	Strombidiida	Strombidiidae_L	Strombidiidae_L_X	Strombidiidae_L_X_sp.	Ciliophora (Alveolata)
378	Eukaryota	Alveolata	Dinoflagellata	Dinophyceae	Dinophyceae_X	Tovelliaceae	Woloszynskia	Woloszynskia_halophila	Dinoflagellata (Alveolata)
379	Eukaryota	Stramenopiles	Opalozoa	MAST-3	MAST-3F	MAST-3F_X	MAST-3F_XX	MAST-3F_XX_sp.	Bacillariophyta (Stramenopiles)
381	Eukaryota	Alveolata	Ciliophora	Spirotrichea	Tintinnida	TIN_11	Helicostomella	Helicostomella_subulata	Ciliophora (Alveolata)
382	Eukaryota	Alveolata	Dinoflagellata	Dinophyceae	Dinophyceae_X	Dinophyceae_XX	Dinophyceae_XXX	Dinophyceae_XXX_sp.	Dinoflagellata (Alveolata)
383	Eukaryota	Alveolata	Ciliophora	Spirotrichea	Choreotrichida	Strobilidiidae_I	Pelagostrobilidium	Pelagostrobilidium_neptuni	Ciliophora (Alveolata)
385	Eukaryota	Alveolata	Dinoflagellata	Dinophyceae	Prorocentrales	Prorocentraceae	Prorocentrum	Prorocentrum_sp.	Dinoflagellata (Alveolata)
386	Eukaryota	Alveolata	Dinoflagellata	Dinophyceae	Dinophysiales	Oxyphysiaceae	Phalachroma	Phalacroma_rotundatum	Dinoflagellata (Alveolata)
387	Eukaryota	Hacrobia	Katablepharidophyta	Katablepharidaceae	Katablepharidales	Katablepharidales_X	Katablepharidales_XX	Katablepharidales_XX_sp.	Flagellated cells
388	Eukaryota	Alveolata	Dinoflagellata	Dinophyceae	Suessiales	Suessiaceae	Pelagodinium	Pelagodinium_sp.	Dinoflagellata (Alveolata)
389	Eukaryota	Alveolata	Ciliophora	Spirotrichea	Strombidiida	Strombidiidae	Strombidiidae_X	Strombidiidae_X_sp.	Ciliophora (Alveolata)
391	Eukaryota	Rhizaria	Cercozoa	Filosa-Thecofilosea	Ventricleftida	Ventrifissuridae	Ventrifissuridae_X	Ventrifissuridae_X_sp.	Flagellated cells
393	Eukaryota	Rhizaria	Cercozoa	Filosa-Thecofilosea	Cryomonadida	Cryothecomonas-lineage	Cryothecomonas-lineage_X	Cryothecomonas-lineage_X_sp.	Flagellated cells
394	Eukaryota	Rhizaria	Cercozoa	Filosa-Sarcomonadea	Cercomonadida	Cercomonadidae	Eocercomonas	Eocercomonas_echina	Flagellated cells
395	Eukaryota	Opisthokonta	Mesomycetozoa	Ichthyosporea	Ichthyosphonida	Ichthyosphonida_X	Ichthyosphonida_XX	Ichthyosphonida_XX_sp.	Flagellated cells
396	Eukaryota	Rhizaria	Cercozoa	Filosa-Thecofilosea	Filosa-Thecofilosea_X	Mataza-lineage	Mataza-lineage_X	Mataza-lineage_X_sp.	Flagellated cells
398	Eukaryota	Hacrobia	Centroheliozoa	Centroheliozoa_X	Centroheliozoa_XX	Centroheliozoa_XXX	Centroheliozoa_XXXX	Centroheliozoa_XXXX_sp.	Flagellated cells
399	Eukaryota	Rhizaria	Cercozoa	Endomyxa	Novel-clade-9	Novel-clade-9_X	Novel-clade-9_XX	Novel-clade-9_XX_sp.	Flagellated cells
400	Eukaryota	Alveolata	Dinoflagellata	Dinophyceae	Peridiniales	Thoracosphaeraceae	Pentapharsodinium	Pentapharsodinium_tyrrhenicum	Dinoflagellata (Alveolata)
402	Eukaryota	Rhizaria	Cercozoa	Filosa-Imbricatea	Marimonadida	Marimonadida_X	Pseudopirsonia	Pseudopirsonia_sp.	Flagellated cells
404	Eukaryota	Opisthokonta	Mesomycetozoa	Ichthyosporea	Ichthyosphonida	Pseudoperkinsidae	Pseudoperkinsidae_X	Pseudoperkinsidae_X_sp.	Flagellated cells
405	Eukaryota	Alveolata	Dinoflagellata	Dinophyceae	Peridiniales	Heterocapsaceae	Heterocapsa	Heterocapsa_nei/rotundata	Dinoflagellata (Alveolata)
406	Eukaryota	Stramenopiles	Ochrophyta	Chrysophyceae	Chrysophyceae_X	Chrysophyceae_Clade-H	Chrysophyceae_Clade-H_X	Chrysophyceae_Clade-H_X_sp.	Bacillariophyta (Stramenopiles)
407	Eukaryota	Alveolata	Ciliophora	Phyllopharyngea	Suctoria	Ephelotidae	Ephelota	Ephelota_mammillata	Ciliophora (Alveolata)
408	Eukaryota	Hacrobia	Katablepharidophyta	Katablepharidaceae	Katablepharidales	Katablepharidales_X	Katablepharis	Katablepharis_japonica	Flagellated cells
409	Eukaryota	Alveolata	Ciliophora	Spirotrichea	Choreotrichida	Strombidinopsidae	Strombidinopsis	Strombidinopsis_acuminata	Ciliophora (Alveolata)
410	Eukaryota	Alveolata	Dinoflagellata	Syndiniales	Dino-Group-II	Dino-Group-II-Clade-14	Dino-Group-II-Clade-14_X	Dino-Group-II-Clade-14_X_sp.	Dinoflagellata (Alveolata)
411	Eukaryota	Rhizaria	Cercozoa	Filosa-Thecofilosea	Cryomonadida	Protaspa-lineage	Protaspa-lineage_X	Protaspa-lineage_X_sp.	Flagellated cells
412	Eukaryota	Hacrobia	Haptophyta	Prymnesiophyceae	Prymnesiales	Chrysochromulinaceae	Chrysochromulina	Chrysochromulina_sp.	Flagellated cells
414	Eukaryota	Hacrobia	Katablepharidophyta	Katablepharidaceae	Katablepharidales	Katablepharidales_X	Leucocryptos	Leucocryptos_marina	Flagellated cells
416	Eukaryota	Stramenopiles	Ochrophyta	Bacillariophyta	Bacillariophyta_X	Polar-centric-Mediophyceae	Thalassiosira	Thalassiosira_oceanica	Bacillariophyta (Stramenopiles)
417	Eukaryota	Alveolata	Dinoflagellata	Dinophyceae	Peridiniales	Kryptoperidiniaceae	Unruhdinium	Unruhdinium_minima	Dinoflagellata (Alveolata)
418	Eukaryota	Alveolata	Dinoflagellata	Dinophyceae	Gymnodiniales	Kareniaceae	Karlodinium	Karlodinium_veneficum	Dinoflagellata (Alveolata)
419	Eukaryota	Alveolata	Dinoflagellata	Syndiniales	Dino-Group-I	Dino-Group-I-Clade-4	Dino-Group-I-Clade-4_X	Dino-Group-I-Clade-4_X_sp.	Dinoflagellata (Alveolata)
421	Eukaryota	Rhizaria	Cercozoa	Filosa-Imbricatea	Thaumatomonadida	Thaumatomonadidae	Thaumatomastix	Thaumatomastix_sp.	Flagellated cells
422	Eukaryota	Rhizaria	Cercozoa	Filosa-Thecofilosea	Ebriida	Botuliformidae	Botuliformidae_X	Botuliformidae_X_sp.	Flagellated cells
423	Eukaryota	Rhizaria	Cercozoa	Filosa-Thecofilosea	Cryomonadida	Protaspa-lineage	Protaspa-lineage_X	Protaspa-lineage_X_sp.	Flagellated cells
425	Eukaryota	Rhizaria	Cercozoa	Filosa-Thecofilosea	Cryomonadida	Cryothecomonas-lineage	Cryothecomonas	Cryothecomonas_sp.	Flagellated cells
426	Eukaryota	Rhizaria	Cercozoa	Filosa-Thecofilosea	Cryomonadida	Protaspa-lineage	Protaspa-lineage_X	Protaspa-lineage_X_sp.	Flagellated cells
427	Eukaryota	Alveolata	Dinoflagellata	Syndiniales	Dino-Group-II	Dino-Group-II-Clade-1	Dino-Group-II-Clade-1_X	Dino-Group-II-Clade-1_X_sp.	Dinoflagellata (Alveolata)
428	Eukaryota	Rhizaria	Cercozoa	Filosa-Thecofilosea	Cryomonadida	Cryothecomonas-lineage	Cryothecomonas	Cryothecomonas_aestivalis	Flagellated cells
429	Eukaryota	Stramenopiles	Ochrophyta	Bacillariophyta	Bacillariophyta_X	Polar-centric-Mediophyceae	Chaetoceros	Chaetoceros_danicus	Bacillariophyta (Stramenopiles)
430	Eukaryota	Stramenopiles	Ochrophyta	Bacillariophyta	Bacillariophyta_X	Raphid-pennate	Navicula	Navicula_sp.	Bacillariophyta (Stramenopiles)
431	Eukaryota	Alveolata	Dinoflagellata	Syndiniales	Dino-Group-I	Dino-Group-I-Clade-1	Dino-Group-I-Clade-1_X	Dino-Group-I-Clade-1_X_sp.	Dinoflagellata (Alveolata)
432	Eukaryota	Archaeplastida	Chlorophyta	Mamiellophyceae	Mamiellales	Bathycoccaceae	Bathycoccus	Bathycoccus_prasinos	Flagellated cells
433	Eukaryota	Archaeplastida	Chlorophyta	Trebouxiophyceae	Microthamniales	Microthamniales_X	Trebouxia	Trebouxia_sp.	Flagellated cells
434	Eukaryota	Alveolata	Dinoflagellata	Noctilucophyceae	Noctilucales	Noctilucaceae	Spatulodinium	Spatulodinium_pseudonoctiluca	Dinoflagellata (Alveolata)
436	Eukaryota	Alveolata	Dinoflagellata	Syndiniales	Dino-Group-II	Dino-Group-II-Clade-1	Dino-Group-II-Clade-1_X	Dino-Group-II-Clade-1_X_sp.	Dinoflagellata (Alveolata)
437	Eukaryota	Stramenopiles	Ochrophyta	Chrysophyceae	Chrysophyceae_X	Chrysophyceae_Clade-H	Chrysophyceae_Clade-H_X	Chrysophyceae_Clade-H_X_sp.	Bacillariophyta (Stramenopiles)
438	Eukaryota	Stramenopiles	Ochrophyta	Bacillariophyta	Bacillariophyta_X	Raphid-pennate	Nitzschia	Nitzschia_pusilla	Bacillariophyta (Stramenopiles)
439	Eukaryota	Rhizaria	Radiolaria	Acantharea	Acantharea_X	Acantharea_XX	Acantharea_XXX	Acantharea_XXX_sp.	Flagellated cells
440	Eukaryota	Rhizaria	Cercozoa	Filosa-Imbricatea	Thaumatomonadida	Thaumatomonadidae	Reckertia	Reckertia_filosa	Flagellated cells
441	Eukaryota	Alveolata	Dinoflagellata	Syndiniales	Dino-Group-II	Dino-Group-II-Clade-47	Dino-Group-II-Clade-47_X	Dino-Group-II-Clade-47_X_sp.	Dinoflagellata (Alveolata)
442	Eukaryota	Alveolata	Ciliophora	CONThreeP	CONThreeP_X	CONThreeP_XX	Askenasia	Askenasia_sp.	Ciliophora (Alveolata)
443	Eukaryota	Alveolata	Dinoflagellata	Dinophyceae	Gymnodiniales	Gymnodiniaceae	Gymnodinium	Gymnodinium_microreticulatum	Dinoflagellata (Alveolata)
444	Eukaryota	Rhizaria	Cercozoa	Filosa-Thecofilosea	Cryomonadida	Cryothecomonas-lineage	Cryothecomonas	Cryothecomonas_aestivalis	Flagellated cells
445	Eukaryota	Alveolata	Ciliophora	CONThreeP	CONThreeP_X	Urotrichidae	Urotricha	Urotricha_sp.	Ciliophora (Alveolata)
446	Eukaryota	Alveolata	Ciliophora	CONThreeP	CONThreeP_X	Urotrichidae	Urotricha	Urotricha_sp.	Ciliophora (Alveolata)
447	Eukaryota	Stramenopiles	Ochrophyta	Chrysophyceae	Chrysophyceae_X	Chrysophyceae_Clade-H	Chrysophyceae_Clade-H_X	Chrysophyceae_Clade-H_X_sp.	Bacillariophyta (Stramenopiles)
448	Eukaryota	Stramenopiles	Opalozoa	MAST-3	MAST-3I	MAST-3I_X	MAST-3I_XX	MAST-3I_XX_sp.	Bacillariophyta (Stramenopiles)
449	Eukaryota	Stramenopiles	Ochrophyta	Bacillariophyta	Bacillariophyta_X	Raphid-pennate	Pleurosigma	Pleurosigma_intermedium	Bacillariophyta (Stramenopiles)
451	Eukaryota	Alveolata	Dinoflagellata	Dinophyceae	Gymnodiniales	Gymnodiniaceae	Gyrodinium	Gyrodinium_fusiforme	Dinoflagellata (Alveolata)
452	Eukaryota	Hacrobia	Katablepharidophyta	Katablepharidaceae	Katablepharidales	Katablepharidales_X	Roombia	Roombia_truncata	Flagellated cells
453	Eukaryota	Alveolata	Ciliophora	CONThreeP	CONThreeP_X	Urotrichidae	Urotricha	Urotricha_sp.	Ciliophora (Alveolata)
455	Eukaryota	Alveolata	Dinoflagellata	Dinophyceae	Dinophyceae_X	Dinophyceae_XX	Dinophyceae_XXX	Dinophyceae_XXX_sp.	Dinoflagellata (Alveolata)
456	Eukaryota	Alveolata	Ciliophora	Phyllopharyngea	Suctoria	Suctoria_X	Suctoria_XX	Suctoria_XX_sp.	Ciliophora (Alveolata)
457	Eukaryota	Alveolata	Dinoflagellata	Dinophyceae	Gymnodiniales	Warnowiaceae	Warnowia	Warnowia_sp.	Dinoflagellata (Alveolata)
458	Eukaryota	Rhizaria	Cercozoa	Filosa-Thecofilosea	Cryomonadida	Protaspa-lineage	Protaspa-lineage_X	Protaspa-lineage_X_sp.	Flagellated cells
459	Eukaryota	Alveolata	Dinoflagellata	Syndiniales	Dino-Group-II	Dino-Group-II-Clade-47	Dino-Group-II-Clade-47_X	Dino-Group-II-Clade-47_X_sp.	Dinoflagellata (Alveolata)
460	Eukaryota	Alveolata	Dinoflagellata	Syndiniales	Dino-Group-II	Dino-Group-II-Clade-22	Dino-Group-II-Clade-22_X	Dino-Group-II-Clade-22_X_sp.	Dinoflagellata (Alveolata)
463	Eukaryota	Alveolata	Dinoflagellata	Dinophyceae	Peridiniales	Peridiniaceae	Peridinium	Peridinium_sociale	Dinoflagellata (Alveolata)
464	Eukaryota	Rhizaria	Cercozoa	Filosa-Thecofilosea	Ebriida	Botuliformidae	Botuliforma	Botuliforma_benthica	Flagellated cells
465	Eukaryota	Alveolata	Perkinsea	Perkinsida	Perkinsida_X	Perkinsida_XX	Perkinsus	Perkinsus_qugwadi	Flagellated cells
467	Eukaryota	Amoebozoa	Lobosa	Lobosa_X	Himatismenida	Parvamoebidae	Parvamoeba	Parvamoeba_sp.	Flagellated cells
468	Eukaryota	Rhizaria	Cercozoa	Filosa-Imbricatea	Marimonadida	Marimonadida_X	Auranticordis	Auranticordis_quadriverberis	Flagellated cells
469	Eukaryota	Alveolata	Ciliophora	Spirotrichea	Choreotrichida	Strombidinopsidae	Strombidinopsis	Strombidinopsis_batos	Ciliophora (Alveolata)
470	Eukaryota	Alveolata	Ciliophora	Oligohymenophorea	Scuticociliatia_1	Philasterida	Philasterida_X	Philasterida_X_sp.	Ciliophora (Alveolata)
471	Eukaryota	Alveolata	Dinoflagellata	Syndiniales	Dino-Group-I	Dino-Group-I-Clade-4	Dino-Group-I-Clade-4_X	Dino-Group-I-Clade-4_X_sp.	Dinoflagellata (Alveolata)
472	Eukaryota	Rhizaria	Cercozoa	Filosa-Imbricatea	Euglyphida	Euglyphida_X	Euglyphida_XX	Euglyphida_XX_sp.	Flagellated cells
473	Eukaryota	Alveolata	Dinoflagellata	Dinophyceae	Suessiales	Suessiaceae	Pelagodinium	Pelagodinium_sp.	Dinoflagellata (Alveolata)
474	Eukaryota	Stramenopiles	Ochrophyta	Bacillariophyta	Bacillariophyta_X	Polar-centric-Mediophyceae	Chaetoceros	Chaetoceros_protuberans	Bacillariophyta (Stramenopiles)
477	Eukaryota	Stramenopiles	Ochrophyta	Bacillariophyta	Bacillariophyta_X	Radial-centric-basal-Coscinodiscophyceae	Actinocyclus	Actinocyclus_sp.	Bacillariophyta (Stramenopiles)
478	Eukaryota	Alveolata	Dinoflagellata	Dinophyceae	Gymnodiniales	Gymnodiniaceae	Gyrodinium	Gyrodinium_fusiforme	Dinoflagellata (Alveolata)
479	Eukaryota	Rhizaria	Cercozoa	Endomyxa	Novel-clade-9	Novel-clade-9_X	Novel-clade-9_XX	Novel-clade-9_XX_sp.	Flagellated cells
480	Eukaryota	Rhizaria	Cercozoa	Filosa-Thecofilosea	Cryomonadida	Protaspa-lineage	Protaspa-lineage_X	Protaspa-lineage_X_sp.	Flagellated cells
481	Eukaryota	Stramenopiles	Opalozoa	MAST-3	MAST-3A	MAST-3A_X	MAST-3A_XX	MAST-3A_XX_sp.	Bacillariophyta (Stramenopiles)
482	Eukaryota	Alveolata	Dinoflagellata	Syndiniales	Dino-Group-II	Dino-Group-II-Clade-6	Dino-Group-II-Clade-6_X	Dino-Group-II-Clade-6_X_sp.	Dinoflagellata (Alveolata)
483	Eukaryota	Alveolata	Dinoflagellata	Syndiniales	Dino-Group-II	Dino-Group-II-Clade-14	Dino-Group-II-Clade-14_X	Dino-Group-II-Clade-14_X_sp.	Dinoflagellata (Alveolata)
484	Eukaryota	Rhizaria	Cercozoa	Filosa-Thecofilosea	Cryomonadida	Protaspa-lineage	Protaspa-lineage_X	Protaspa-lineage_X_sp.	Flagellated cells
485	Eukaryota	Alveolata	Ciliophora	CONThreeP	CONThreeP_X	Urotrichidae	Urotricha	Urotricha_sp.	Ciliophora (Alveolata)
486	Eukaryota	Stramenopiles	Ochrophyta	Bolidophyceae	Parmales	Parmales_X	Parmales_XX	Parmales_XX_sp.	Bacillariophyta (Stramenopiles)
487	Eukaryota	Alveolata	Ciliophora	Spirotrichea	Strombidiida	Strombidiidae	Spirostrombidium	Spirostrombidium_agathae	Ciliophora (Alveolata)
488	Eukaryota	Alveolata	Ciliophora	CONThreeP	CONThreeP_X	Urotrichidae	Urotricha	Urotricha_sp.	Ciliophora (Alveolata)
489	Eukaryota	Rhizaria	Cercozoa	Filosa-Thecofilosea	Filosa-Thecofilosea_X	Mataza-lineage	Mataza-lineage_X	Mataza-lineage_X_sp.	Flagellated cells
490	Eukaryota	Rhizaria	Cercozoa	Filosa-Thecofilosea	Ebriida	Botuliformidae	Botuliforma	Botuliforma_benthica	Flagellated cells
491	Eukaryota	Hacrobia	Haptophyta	Prymnesiophyceae	Prymnesiales	Chrysochromulinaceae	Chrysochromulina	Chrysochromulina_sp.	Flagellated cells
492	Eukaryota	Alveolata	Ciliophora	Spirotrichea	Strombidiida	Strombidiidae	Strombidium	Strombidium_sp.	Ciliophora (Alveolata)
493	Eukaryota	Alveolata	Dinoflagellata	Dinophyceae	Peridiniales	Protoperidiniaceae	Protoperidinium	Protoperidinium_bipes	Dinoflagellata (Alveolata)
495	Eukaryota	Alveolata	Dinoflagellata	Dinophyceae	Dinophyceae_X	Dinophyceae_XX	Dinophyceae_XXX	Dinophyceae_XXX_sp.	Dinoflagellata (Alveolata)
496	Eukaryota	Stramenopiles	Ochrophyta	Bacillariophyta	Bacillariophyta_X	Araphid-pennate	Delphineis	Delphineis_sp.	Bacillariophyta (Stramenopiles)
498	Eukaryota	Rhizaria	Cercozoa	Filosa-Thecofilosea	Ebriida	Botuliformidae	Botuliforma	Botuliforma_benthica	Flagellated cells
501	Eukaryota	Alveolata	Dinoflagellata	Dinophyceae	Gymnodiniales	Gymnodiniaceae	Gyrodinium	Gyrodinium_fusiforme	Dinoflagellata (Alveolata)
502	Eukaryota	Alveolata	Dinoflagellata	Dinophyceae	Gymnodiniales	Gymnodiniaceae	Gyrodinium	Gyrodinium_fusiforme	Dinoflagellata (Alveolata)
503	Eukaryota	Stramenopiles	Ochrophyta	Chrysophyceae	Chrysophyceae_X	Chrysophyceae_Clade-H	Chrysophyceae_Clade-H_X	Chrysophyceae_Clade-H_X_sp.	Bacillariophyta (Stramenopiles)
504	Eukaryota	Hacrobia	Picozoa	Picozoa_X	Picozoa_XX	Picozoa_XXX	Picomonas	Picomonas_judraskeda	Flagellated cells
505	Eukaryota	Rhizaria	Cercozoa	Filosa-Imbricatea	Marimonadida	Marimonadida_X	Pseudopirsonia	Pseudopirsonia_sp.	Flagellated cells
506	Eukaryota	Rhizaria	Cercozoa	Filosa-Sarcomonadea	Cercomonadida	Cercomonadidae	Eocercomonas	Eocercomonas_echina	Flagellated cells
507	Eukaryota	Rhizaria	Cercozoa	Filosa-Thecofilosea	Cryomonadida	Protaspa-lineage	Protaspa-lineage_X	Protaspa-lineage_X_sp.	Flagellated cells
508	Eukaryota	Rhizaria	Cercozoa	Filosa-Thecofilosea	Filosa-Thecofilosea_X	Mataza-lineage	Mataza	Mataza_hastifera	Flagellated cells
509	Eukaryota	Archaeplastida	Rhodophyta	Stylonematophyceae	Porphyridiales-2	Stylonematales-Group-I	Rhodospora	Rhodospora_sordida	Flagellated cells
510	Eukaryota	Alveolata	Dinoflagellata	Dinophyceae	Dinophyceae_X	Dinophyceae_XX	Dinophyceae_XXX	Dinophyceae_XXX_sp.	Dinoflagellata (Alveolata)
511	Eukaryota	Rhizaria	Cercozoa	Filosa-Thecofilosea	Ventricleftida	Ventrifissuridae	Ventrifissura	Ventrifissura_foliiformis	Flagellated cells
512	Eukaryota	Alveolata	Dinoflagellata	Dinophyceae	Gymnodiniales	Warnowiaceae	Warnowia	Warnowia_sp.	Dinoflagellata (Alveolata)
513	Eukaryota	Alveolata	Ciliophora	Spirotrichea	Strombidiida_G	Strombidiida_G_X	Strombidiida_G_XX	Strombidiida_G_XX_sp.	Ciliophora (Alveolata)
514	Eukaryota	Archaeplastida	Chlorophyta	Mamiellophyceae	Mamiellales	Bathycoccaceae	Ostreococcus	Ostreococcus_lucimarinus	Flagellated cells
515	Eukaryota	Alveolata	Dinoflagellata	Dinophyceae	Dinophyceae_X	Dinophyceae_XX	Dinophyceae_XXX	Dinophyceae_XXX_sp.	Dinoflagellata (Alveolata)
516	Eukaryota	Alveolata	Dinoflagellata	Dinophyceae	Gymnodiniales	Gymnodiniaceae	Gyrodinium	Gyrodinium_fusiforme	Dinoflagellata (Alveolata)
517	Eukaryota	Alveolata	Dinoflagellata	Dinophyceae	Gymnodiniales	Kareniaceae	Karlodinium	Karlodinium_veneficum	Dinoflagellata (Alveolata)
518	Eukaryota	Stramenopiles	Ochrophyta	Chrysophyceae	Chrysophyceae_X	Chrysophyceae_Clade-H	Chrysophyceae_Clade-H_X	Chrysophyceae_Clade-H_X_sp.	Bacillariophyta (Stramenopiles)
519	Eukaryota	Stramenopiles	Ochrophyta	Bacillariophyta	Bacillariophyta_X	Polar-centric-Mediophyceae	Chaetoceros	Chaetoceros_elegans	Bacillariophyta (Stramenopiles)
520	Eukaryota	Hacrobia	Picozoa	Picozoa_X	Picozoa_XX	Picozoa_XXX	Picomonas	Picomonas_judraskeda	Flagellated cells
522	Eukaryota	Stramenopiles	Ochrophyta	Chrysophyceae	Chrysophyceae_X	Chrysophyceae_Clade-H	Chrysophyceae_Clade-H_X	Chrysophyceae_Clade-H_X_sp.	Bacillariophyta (Stramenopiles)
523	Eukaryota	Rhizaria	Cercozoa	Filosa-Thecofilosea	Cryomonadida	Protaspa-lineage	Protaspa	Protaspa_grandis	Flagellated cells
525	Eukaryota	Stramenopiles	Ochrophyta	Chrysophyceae	Chrysophyceae_X	Chrysophyceae_Clade-I	Chrysophyceae_Clade-I_X	Chrysophyceae_Clade-I_X_sp.	Bacillariophyta (Stramenopiles)
526	Eukaryota	Alveolata	Ciliophora	Spirotrichea	Strombidiida	Strombidiidae_H	Strombidiidae_H_X	Strombidiidae_H_X_sp.	Ciliophora (Alveolata)
527	Eukaryota	Alveolata	Dinoflagellata	Syndiniales	Dino-Group-II	Dino-Group-II-Clade-8	Dino-Group-II-Clade-8_X	Dino-Group-II-Clade-8_X_sp.	Dinoflagellata (Alveolata)
528	Eukaryota	Alveolata	Dinoflagellata	Dinophyceae	Dinophyceae_X	Dinophyceae_XX	Dinophyceae_XXX	Dinophyceae_XXX_sp.	Dinoflagellata (Alveolata)
530	Eukaryota	Stramenopiles	Opalozoa	MAST-3	MAST-3E	MAST-3E_X	MAST-3E_XX	MAST-3E_XX_sp.	Bacillariophyta (Stramenopiles)
531	Eukaryota	Stramenopiles	Opalozoa	MAST-3	MAST-3A	MAST-3A_X	MAST-3A_XX	MAST-3A_XX_sp.	Bacillariophyta (Stramenopiles)
532	Eukaryota	Stramenopiles	Ochrophyta	Bacillariophyta	Bacillariophyta_X	Radial-centric-basal-Coscinodiscophyceae	Paralia	Paralia_sulcata	Bacillariophyta (Stramenopiles)
533	Eukaryota	Hacrobia	Picozoa	Picozoa_X	Picozoa_XX	Picozoa_XXX	Picomonas	Picomonas_judraskeda	Flagellated cells
535	Eukaryota	Rhizaria	Cercozoa	Filosa-Thecofilosea	Cryomonadida	Protaspa-lineage	Protaspa-lineage_X	Protaspa-lineage_X_sp.	Flagellated cells
536	Eukaryota	Alveolata	Ciliophora	Cyclotrichium_like_organism	Cyclotrichium_like_organism_X	Cyclotrichium_like_organism_XX	Cyclotrichium	Cyclotrichium_cyclokaryon	Ciliophora (Alveolata)
537	Eukaryota	Stramenopiles	Ochrophyta	Bacillariophyta	Bacillariophyta_X	Polar-centric-Mediophyceae	Ditylum	Ditylum_brightwellii	Bacillariophyta (Stramenopiles)
[truncated: 1,460 more rows]
